# Supplementary material for: IL1-Induced JAK/STAT Signaling Is Antagonized by TGFβ to Shape CAF Heterogeneity in Pancreatic Ductal Adenocarcinoma
Source: Oxford University Press journal article supplement (doi:10.1158/2159-8290.cd-18-0710), 2018-10-26
Supplement: 21598290cd180710-sup-204092_2_supp_5105354_pgt0q9.xls [file 21598290cd180710-sup-204092_2_supp_5105354_pgt0q9.xls]

## Sheet: TPM.final.count.table RNA-seq
geneid	type	geneName	TPM.298860 (MG_1)	TPM.298861 (CM_1)	TPM.298862 (CM+JAKi_1)	TPM.298863 (MG_2)	TPM.298864 (CM_2)	TPM.298865 (CM+JAKi_2)	TPM.298866 (MG_3)	TPM.298867 (CM_3)	TPM.298868 (CM+JAKi_3)
ENSMUSG00000000001.4	protein_coding	Gnai3	58.11	53.03	62.97	60.89	64.22	67.45	68.48	70.25	75.34
ENSMUSG00000000003.9	protein_coding	Pbsn	0	0	0	0	0	0	0	0	0
ENSMUSG00000000028.8	protein_coding	Cdc45	31.65	43.41	32.2	27.89	37.98	29.85	28.91	37.71	27.33
ENSMUSG00000000031.9	processed_transcript	H19	183.24	2.24	54.76	9.16	5.27	10.79	16.8	6.6	7.95
ENSMUSG00000000037.9	protein_coding	Scml2	1.34	0.63	0.85	0.93	0.63	0.72	0.93	0.78	1.09
ENSMUSG00000000049.5	protein_coding	Apoh	0.26	0.11	0.24	0.42	0.1	0.55	0.53	0	0.41
ENSMUSG00000000056.7	protein_coding	Narf	4.96	5.26	5.22	5.45	5.43	6.17	6.76	6.31	8.75
ENSMUSG00000000058.6	protein_coding	Cav2	21.71	12.86	16.04	19.65	18.68	14.68	21.62	16.68	16.64
ENSMUSG00000000078.6	protein_coding	Klf6	27.31	19.39	23.41	33.44	27.79	29.97	32.35	24.48	31.76
ENSMUSG00000000085.9	protein_coding	Scmh1	13.95	14.69	13.61	12.16	14.11	12.55	11.35	13.62	14.56
ENSMUSG00000000088.6	protein_coding	Cox5a	86.05	91.48	90.89	92.96	80.2	89.01	104.19	106.04	105.44
ENSMUSG00000000093.6	protein_coding	Tbx2	0.27	0.2	0.39	0.25	0.27	0.44	0.24	0.15	0.41
ENSMUSG00000000094.6	protein_coding	Tbx4	0	0	0	0	0	0.01	0	0	0.01
ENSMUSG00000000103.6	protein_coding	Zfy2	0	0	0	0	0	0	0	0	0
ENSMUSG00000000120.6	protein_coding	Ngfr	0.08	0.02	0.08	0.07	0.05	0.03	0.08	0.02	0.02
ENSMUSG00000000125.5	protein_coding	Wnt3	0.04	0	0.02	0.03	0.02	0.02	0.02	0	0.02
ENSMUSG00000000126.5	protein_coding	Wnt9a	0.27	0.13	0.31	0.25	0.23	0.38	0.16	0.31	0.56
ENSMUSG00000000127.7	protein_coding	Fer	28.15	23.11	26.47	30.42	30.67	30.71	29.16	30.57	32.29
ENSMUSG00000000131.9	protein_coding	Xpo6	18.26	19.03	18.22	16.43	20.15	19.79	22.81	21.69	23.99
ENSMUSG00000000134.11	protein_coding	Tcfe3	38.03	42.15	43.32	30.84	37.47	30.63	34.63	34.59	34.72
ENSMUSG00000000142.9	protein_coding	Axin2	2.34	0.16	1.44	1.79	0.35	1.58	1.34	0.57	0.97
ENSMUSG00000000148.10	protein_coding	Baat1	7.15	4.93	7.7	6.6	6.13	7.97	6.97	6.53	9.08
ENSMUSG00000000149.5	protein_coding	Gna12	31.53	23.72	37.01	31.33	28.23	38.23	34.13	27.92	37.78
ENSMUSG00000000154.8	protein_coding	Slc22a18	0.04	0.02	0	0.08	0	0.04	0	0.02	0.05
ENSMUSG00000000157.8	protein_coding	Itgb2l	0	0	0	0	0	0	0	0	0
ENSMUSG00000000159.9	protein_coding	Igsf5	0	0	0	0	0	0	0	0.11	0
ENSMUSG00000000167.8	protein_coding	Pih1d2	2.7	1.53	2.78	2.11	2.42	2.3	2.16	3.08	2.26
ENSMUSG00000000168.3	protein_coding	Dlat	22.59	20.34	24.68	24.41	21.51	21.43	25.51	20.78	20.67
ENSMUSG00000000171.4	protein_coding	Sdhd	66.56	69.05	77.19	71.64	66.66	73.16	73.52	80	80.36
ENSMUSG00000000182.7	protein_coding	Fgf23	31.93	17.63	5.56	6.04	14.35	0.37	10.84	34.08	1.2
ENSMUSG00000000183.5	protein_coding	Fgf6	0	0.02	0	0	0	0.02	0.03	0	0
ENSMUSG00000000184.9	protein_coding	Ccnd2	17.01	15.06	15.93	21.49	18.88	15.64	26.21	22.53	25.84
ENSMUSG00000000194.7	protein_coding	Gpr107	21.74	23.27	25.33	22.92	25.42	24.18	24.73	27.66	23.67
ENSMUSG00000000197.6	protein_coding	Nalcn	0.02	0	0.02	0.01	0	0.01	0	0	0
ENSMUSG00000000202.3	protein_coding	Btbd17	0	0	0	0.01	0	0.01	0	0	0.06
ENSMUSG00000000204.8	protein_coding	Slfn4	0	0.08	0	0	0.02	0	0	0.02	0
ENSMUSG00000000214.4	protein_coding	Th	0	0	0	0	0.03	0	0	0	0
ENSMUSG00000000215.4	protein_coding	Ins2	0	0	0.17	0	0	0	0	0	0
ENSMUSG00000000216.7	protein_coding	Scnn1g	0.04	0	0.03	0	0	0	0	0	0
ENSMUSG00000000223.6	protein_coding	Drp2	1.07	0.25	1	0.83	0.36	0.77	0.79	0.37	0.81
ENSMUSG00000000244.9	protein_coding	Tspan32	0.04	0	0	0.13	0	0.07	0.05	0	0.13
ENSMUSG00000000247.4	protein_coding	Lhx2	0.35	0.16	0.48	0.24	0.19	0.39	0.4	0.39	0.31
ENSMUSG00000000248.9	protein_coding	Clec2g	0.13	0.01	0	0.12	0.01	0	0	0	0
ENSMUSG00000000253.6	protein_coding	Gmpr	3.19	2.09	3.5	2.67	2.37	3.99	2.81	2.9	3.77
ENSMUSG00000000263.9	protein_coding	Glra1	0	0.03	0	0	0.01	0.01	0	0.02	0.02
ENSMUSG00000000266.5	protein_coding	Mid2	5.48	2.91	4.06	4.5	3.37	3.09	4.28	2.17	2.47
ENSMUSG00000000275.9	protein_coding	Trim25	15.22	22.22	4.62	8.85	27.52	5.61	10.97	22.32	6.39
ENSMUSG00000000276.5	protein_coding	Dgke	2.52	3.28	2.75	2.25	3.83	3.19	3.2	4.1	3.66
ENSMUSG00000000278.9	protein_coding	Scpep1	218.73	162.99	189.39	220.03	239.69	194.71	227.58	189.46	179.32
ENSMUSG00000000282.6	protein_coding	Mnt	3.58	3.2	3.99	2.43	3.06	2.96	2.8	3.43	3.8
ENSMUSG00000000290.7	protein_coding	Itgb2	0.87	1.07	1.12	0.38	1.02	0.81	0.49	0.99	0.79
ENSMUSG00000000295.6	protein_coding	Hddc2	7.71	7.9	7.43	9.93	8.15	10.01	9.48	11.71	13.33
ENSMUSG00000000296.6	protein_coding	Tpd52l1	0.73	0.95	0.62	0.8	0.92	1.24	1.35	1.25	1.68
ENSMUSG00000000301.9	protein_coding	Pemt	3.17	3.88	2.49	4.46	5.18	3.52	5.1	5.78	4.57
ENSMUSG00000000303.6	protein_coding	Cdh1	0	0.05	0.02	0.01	0.04	0.04	0.05	0.02	0.05
ENSMUSG00000000305.6	protein_coding	Cdh4	0	0	0	0	0	0	0.05	0	0
ENSMUSG00000000308.8	protein_coding	Ckmt1	0.05	0.09	0.02	0.05	0	0.02	0	0	0.12
ENSMUSG00000000317.5	protein_coding	Bcl6b	0.43	0.7	0.66	0.53	0.69	0.61	0.32	0.52	0.73
ENSMUSG00000000318.9	protein_coding	Clec10a	0	0	0	0.09	0.02	0	0	0	0.08
ENSMUSG00000000320.3	protein_coding	Alox12	0.21	0.33	0.19	0.14	0.18	0.29	0.18	0.23	0.32
ENSMUSG00000000325.8	protein_coding	Arvcf	8.83	1.96	7.98	5.9	2.72	6.62	4.75	2.11	5.88
ENSMUSG00000000326.6	protein_coding	Comt	57.98	34.56	49.69	46.22	34.89	41.65	43.41	34.06	40.53
ENSMUSG00000000339.8	protein_coding	Rtcd1	22.44	25.55	21.34	24.47	25.14	23.5	27.73	27.49	26.77
ENSMUSG00000000340.6	protein_coding	Dbt	4.19	1.81	5.02	5.39	3.97	6.54	6.05	5.18	7.36
ENSMUSG00000000346.7	protein_coding	Dazap2	83.07	76.64	81.35	78.69	77.35	67	75.33	81.07	68.13
ENSMUSG00000000355.6	protein_coding	Mcts1	25.99	30.5	26.4	21.85	22.87	22.87	23.99	26.65	24.28
ENSMUSG00000000359.3	protein_coding	Rem1	4.97	3.16	4.69	4.94	5.58	3.82	4.12	3.07	2.48
ENSMUSG00000000365.7	protein_coding	Rnf17	0.02	0.01	0.01	0	0	0.01	0.01	0	0.01
ENSMUSG00000000374.7	protein_coding	Trappc10	19.59	16.65	20.77	18.2	19.29	21.95	20.97	20.79	23.21
ENSMUSG00000000378.8	protein_coding	Ccm2	25.66	25.94	29.26	31.67	35.86	36.9	35.68	35.18	39.32
ENSMUSG00000000381.9	protein_coding	Wap	0.1	0.15	0.11	0.1	0.09	0.24	0.1	0.09	0.1
ENSMUSG00000000384.8	protein_coding	Tbrg4	15.51	22.53	16.56	20.8	26.21	22.83	27.42	25.29	26.01
ENSMUSG00000000385.7	protein_coding	Tmprss2	0.18	0.23	0.02	0.05	0.28	0	0.02	0.16	0.01
ENSMUSG00000000386.8	protein_coding	Mx1	1.77	4.44	0.16	0.49	8.79	0.03	0.48	2.37	0.04
ENSMUSG00000000392.11	protein_coding	Fap	3.83	2.11	7.4	5.13	6.54	12.97	3	5	13.8
ENSMUSG00000000394.9	protein_coding	Gcg	0	0	0	0	0.03	0	0	0.05	0
ENSMUSG00000000399.7	protein_coding	Ndufa9	46.71	37.7	49.05	53.88	48.97	58.08	61.65	57.55	61.92
ENSMUSG00000000402.2	protein_coding	Egfl6	4.45	0.04	1.21	0.62	0.05	0.22	1.24	0.18	0.33
ENSMUSG00000000409.8	protein_coding	Lck	1.3	5.82	0.75	1.1	5.21	0.78	1.17	3.04	1.55
ENSMUSG00000000411.7	protein_coding	Tssk3	0.19	0.02	0.07	0.02	0.15	0.08	0.18	0.14	0.06
ENSMUSG00000000416.9	protein_coding	Cttnbp2	0.01	0.07	0.01	0.1	0.27	0.09	0.26	0.2	0.26
ENSMUSG00000000420.8	protein_coding	Galnt1	27.06	30.5	31.28	28.91	30.97	34.88	31.68	34.81	37.57
ENSMUSG00000000435.1	protein_coding	Myf5	0	0	0	0	0	0	0	0.01	0
ENSMUSG00000000439.7	protein_coding	Mkrn2	9.96	9.93	10.72	11.16	10.69	11.13	10.66	10.23	13.55
ENSMUSG00000000440.6	protein_coding	Pparg	1.3	0.52	1.81	1.74	1.33	3.42	1.48	1.09	3.49
ENSMUSG00000000441.10	protein_coding	Raf1	44.71	34.64	46.61	44.47	38.26	44.92	42.28	38.12	47.78
ENSMUSG00000000486.7	protein_coding	2001-09-01	2.08	0.62	1.62	0.9	0.61	1.79	1.07	0.68	1.45
ENSMUSG00000000489.6	protein_coding	Pdgfb	0.23	0.21	0.2	0.22	0.25	0.15	0.15	0.13	0.14
ENSMUSG00000000530.9	protein_coding	Acvrl1	1.66	2.32	1.98	1.23	1.2	1.4	0.84	1.77	2.86
ENSMUSG00000000531.4	protein_coding	Grasp	11.17	6.6	10.07	7.53	8.69	7.75	7.36	7.53	7.63
ENSMUSG00000000532.8	protein_coding	Acvr1b	8.92	12.59	9.02	5.87	9.46	7.18	7.78	15.53	9.32
ENSMUSG00000000538.11	protein_coding	Tom1l2	14.59	9.16	14.54	13.53	13.17	16.93	13.22	12.66	17.28
ENSMUSG00000000544.8	protein_coding	Gpa33	0.03	0	0	0.01	0.02	0.01	0	0	0.01
ENSMUSG00000000552.8	protein_coding	Zfp385a	3.46	2.77	3.7	2.61	3.26	3.53	3.11	3.56	4.68
ENSMUSG00000000555.6	protein_coding	Itga5	16.05	28.34	15.13	16.31	20.67	14.7	19.29	25.55	16.52
ENSMUSG00000000560.5	protein_coding	Gabra2	0	0	0	0	0	0.02	0	0	0.01
ENSMUSG00000000561.8	protein_coding	Wdr77	28.7	37.68	25.47	34.31	37.51	31.62	40.38	38.34	40.6
ENSMUSG00000000562.4	protein_coding	Adora3	0	0	0	0	0	0	0	0	0
ENSMUSG00000000563.11	protein_coding	Atp5f1	108.22	110.92	125.1	131.22	120.54	133.28	144.09	148.18	152.79
ENSMUSG00000000567.4	protein_coding	Sox9	5.15	2.43	3.18	2.97	3.85	3.22	2.89	2.51	2.91
ENSMUSG00000000568.9	protein_coding	Hnrnpd	39.7	38.9	37.51	26.28	36.23	25.93	29.81	33.86	29.59
ENSMUSG00000000579.8	protein_coding	Dynlt1c	9.39	6.16	10.58	10.62	9.17	11.2	9.58	9.21	9.75
ENSMUSG00000000581.2	protein_coding	C1d	25.25	20.87	30.65	31.05	29.02	34.61	32.54	37.28	40.26
ENSMUSG00000000594.7	protein_coding	Gm2a	11.98	5.27	11.57	10.77	7.63	13.03	9.16	9.7	15.02
ENSMUSG00000000600.8	protein_coding	Krit1	13.55	12.48	14.93	12.35	14.42	14.36	11.52	13.42	13.86
ENSMUSG00000000605.7	protein_coding	Clcn4-2	14.81	13.4	16.58	13.99	13.9	14.31	13.58	13.81	14.78
ENSMUSG00000000606.8	protein_coding	Vmn2r88	0	0	0	0	0	0	0	0	0
ENSMUSG00000000617.8	protein_coding	Grm6	0	0	0	0	0.02	0.01	0	0	0
ENSMUSG00000000627.9	protein_coding	Sema4f	0.06	0.05	0.09	0.03	0.1	0.06	0.04	0.14	0.07
ENSMUSG00000000628.4	protein_coding	Hk2	5.42	11.06	3.23	3.89	8.94	3.71	6.39	13.75	5.92
ENSMUSG00000000631.12	protein_coding	Myo18a	8.12	5.08	9.06	8.52	6.69	8.55	8.52	8.19	8.66
ENSMUSG00000000632.7	protein_coding	Sez6	0.01	0	0	0.02	0.01	0.02	0	0	0
ENSMUSG00000000673.8	protein_coding	Haao	0	0	0	0	0	0	0	0	0
ENSMUSG00000000682.7	protein_coding	Cd52	0	0	0	0	0	0.07	0	0	0
ENSMUSG00000000686.11	protein_coding	Abhd15	1.79	1.44	1.94	1.99	2.31	2.44	2.32	1.62	2.83
ENSMUSG00000000690.3	protein_coding	Hoxb6	15.91	9.49	16.98	17.01	16.11	21.6	20.67	18.02	19.42
ENSMUSG00000000693.4	protein_coding	Loxl3	25.35	16.4	19.41	22.23	23.79	20.12	24.53	26.26	19.04
ENSMUSG00000000701.7	protein_coding	Tcl1b5	0	0	0	0	0	0.03	0	0	0
ENSMUSG00000000706.9	protein_coding	Btn1a1	0.02	0.03	0.14	0.02	0.09	0.11	0.02	0.1	0.36
ENSMUSG00000000708.8	protein_coding	Kat2b	21.77	14.12	19.93	23.1	22.19	18.97	22.55	23.04	20.32
ENSMUSG00000000711.2	protein_coding	Rab5b	34.48	26.86	37.16	35.3	32.06	42.7	35.38	34.65	42.82
ENSMUSG00000000724.9	protein_coding	Cryba1	0.35	0.37	0.49	0.39	0.55	0.34	0.41	0.4	0.73
ENSMUSG00000000730.7	protein_coding	Dnmt3l	2	7.12	1.91	2.02	5.6	0.96	1.84	3.24	1.73
ENSMUSG00000000731.9	protein_coding	Aire	0	0.02	0	0	0	0	0	0	0
ENSMUSG00000000732.7	protein_coding	Icosl	3.19	1.52	4.03	3.31	2.1	3.69	2.51	1.78	6.14
ENSMUSG00000000738.11	protein_coding	Spg7	32.53	32.42	35.21	26.45	27.26	28.95	29.15	32.05	30.2
ENSMUSG00000000739.7	protein_coding	Sult5a1	1.47	2.91	2.72	0.99	3.03	4.07	1.56	2.16	4.39
ENSMUSG00000000740.5	protein_coding	Rpl13	730.43	1038.13	630.25	835.67	798.32	778.38	896.41	911.87	904.32
ENSMUSG00000000743.8	protein_coding	Chmp1a	53.26	42.08	56.89	45.61	47.08	53.74	47.22	48.18	54.65
ENSMUSG00000000751.7	protein_coding	Rpa1	81.86	55.87	97.01	110.45	98.5	139.9	109.76	94.46	138.58
ENSMUSG00000000753.8	protein_coding	Serpinf1	212.79	328.48	409.95	187.43	252.94	356.02	162.99	256.24	353.7
ENSMUSG00000000759.8	protein_coding	Tubgcp3	36.54	25.25	34.79	30.48	29.85	32.88	30.36	29.01	35.09
ENSMUSG00000000766.11	protein_coding	Oprm1	0	0	0	0	0	0	0	0	0
ENSMUSG00000000776.5	protein_coding	Polr3d	9.61	15.43	8.67	8.31	11.08	9.45	10.21	11.05	11.01
ENSMUSG00000000782.8	protein_coding	Tcf7	2.54	1.43	1.68	1.52	2.12	1.54	1.3	1.68	1
ENSMUSG00000000787.6	protein_coding	Ddx3x	165	185.2	200.53	148.39	164.97	161.24	173.93	182.58	167.78
ENSMUSG00000000791.7	protein_coding	Il12rb1	0.08	0.09	0.03	0.02	0.1	0.05	0.09	0.05	0.06
ENSMUSG00000000792.2	protein_coding	Slc5a5	0.16	0.12	0.1	0.14	0.11	0.16	0.15	0.08	0.11
ENSMUSG00000000794.7	protein_coding	Kcnn3	0.07	0.02	0.12	0.09	0.02	0.06	0.06	0.08	0.05
ENSMUSG00000000804.8	protein_coding	Usp32	12.63	11.36	11.67	10.06	14.68	12.74	11.98	18.39	13.4
ENSMUSG00000000805.11	protein_coding	Car4	0	0	0	0	0	0	0	0	0
ENSMUSG00000000811.7	protein_coding	Txnrd3	3.63	3.3	2.76	3.73	3.69	3.89	3.68	3.55	4.36
ENSMUSG00000000817.8	protein_coding	Fasl	0	0.03	0	0	0	0	0	0.01	0.02
ENSMUSG00000000823.9	protein_coding	Znf512b	7.88	4.45	10.72	9.47	7.79	11.5	10.3	7.55	12.72
ENSMUSG00000000826.10	protein_coding	Dnajc5	22.58	21.77	24.58	25.3	27.71	26.85	28.59	31.3	26.73
ENSMUSG00000000827.10	protein_coding	Tpd52l2	48.02	40.59	45.91	43.89	39.63	49.39	46.9	48.52	50.7
ENSMUSG00000000838.10	protein_coding	Fmr1	78.43	79.83	75.12	57.63	104.61	61.06	70.4	112.39	69.17
ENSMUSG00000000861.9	protein_coding	Bcl11a	0	0	0	0	0	0	0	0	0
ENSMUSG00000000869.6	protein_coding	Il4	0	0	0	0	0	0	0	0	0
ENSMUSG00000000876.5	protein_coding	Pxmp4	7.74	4.42	11.37	10.77	6.9	10.81	7.68	6.65	10.76
ENSMUSG00000000881.6	protein_coding	Dlg3	20.01	12.33	18.14	17.04	13.98	16.3	16.55	17.28	17.2
ENSMUSG00000000884.9	protein_coding	Gnb1l	3.28	3.25	3.83	3.12	2.37	3.62	2.91	2.6	3.6
ENSMUSG00000000889.7	protein_coding	Dbh	0	0	0.01	0.03	0.01	0.01	0	0.01	0.02
ENSMUSG00000000901.8	protein_coding	Mmp11	47.37	15.97	53.33	29.62	22.75	38.37	21.4	17	24.63
ENSMUSG00000000902.6	protein_coding	Smarcb1	47.16	36.63	47.81	49.15	47.36	50.08	48.88	46.98	58.14
ENSMUSG00000000903.3	protein_coding	Vpreb3	0	0.05	0	0	0	0	0.06	0.05	0
ENSMUSG00000000915.9	protein_coding	Hip1r	7.43	5.74	6.79	5.34	5.09	5.87	4.05	4.01	5.17
ENSMUSG00000000916.9	protein_coding	Nsun5	10.68	9.58	8.9	10.12	10.31	10.25	11.65	10.78	12.62
ENSMUSG00000000934.8	protein_coding	Top1mt	6.95	6.42	6.44	5.79	7.66	6.83	6.53	6.68	7.17
ENSMUSG00000000938.9	protein_coding	Hoxa10	19.55	10.55	24.24	15.22	10.34	13.86	14.13	11.06	13.12
ENSMUSG00000000942.9	protein_coding	Hoxa4	1.24	0.91	1.13	0.98	0.79	1.15	0.94	1.11	1.32
ENSMUSG00000000948.9	protein_coding	Snrpn	0.86	0.69	1.37	1.59	1.17	2.64	2.42	1.92	2.93
ENSMUSG00000000957.8	protein_coding	Mmp14	111.08	55.32	113.07	80.66	68.71	80.32	71.54	55.47	78.39
ENSMUSG00000000958.4	protein_coding	Slc7a7	0.6	1.09	0.67	0.35	0.69	0.45	0.31	0.33	0.28
ENSMUSG00000000959.5	protein_coding	Oxa1l	7.27	7.65	6.87	8.25	7.75	7.56	7.94	8.59	8.98
ENSMUSG00000000976.7	protein_coding	Heatr6	8.72	7.52	8.79	10.66	10.44	10.38	10.64	11.04	12.31
ENSMUSG00000000982.5	protein_coding	Ccl3	0	0.12	0.08	0	0.04	0	0	0.04	0.05
ENSMUSG00000000983.7	protein_coding	Expi	0.45	0	0	0.07	0	0	0	0	0
ENSMUSG00000001014.5	protein_coding	Icam4	0.09	0.07	0.2	0	0.11	0.42	0.14	0.07	0.22
ENSMUSG00000001016.8	protein_coding	Ilf2	54.57	54	60.34	62.46	58.89	66.97	68.61	70.5	73.72
ENSMUSG00000001017.9	protein_coding	2500003M10Rik	56.06	59.44	57.11	52.8	57.96	51.76	56.13	57.65	59.55
ENSMUSG00000001018.7	protein_coding	Snapin	28.02	18.23	29.22	29.81	23.78	29.72	27.59	22.85	31.3
ENSMUSG00000001020.7	protein_coding	S100a4	871.47	262.68	1280.57	874.71	260.17	526.77	817.16	340.81	554.65
ENSMUSG00000001021.8	protein_coding	S100a3	2.48	1.1	1.25	2.57	1.64	1.55	2.07	1.17	2
ENSMUSG00000001023.4	protein_coding	S100a5	0.62	0.09	1.02	0.48	0.62	0.45	1.24	0.69	0.87
ENSMUSG00000001025.4	protein_coding	S100a6	1205.36	374.85	984.61	1565.25	721.76	1214.52	1803.14	1050.71	1291.18
ENSMUSG00000001027.7	protein_coding	Scn4a	0.01	0	0	0	0	0.01	0	0	0.01
ENSMUSG00000001029.9	protein_coding	Icam2	0	0	0	0.02	0.07	0.05	0	0	0.09
ENSMUSG00000001034.10	protein_coding	Mapk7	14.03	9.36	13.16	11.61	13.7	14.27	15.7	12.49	16.22
ENSMUSG00000001036.10	protein_coding	Epn2	18.03	25.1	26.49	20.42	30.53	36.26	21.4	38.36	41.69
ENSMUSG00000001039.5	protein_coding	B9d1	13.69	14.87	15.61	13.4	13.41	15.2	12.29	13.3	16.69
ENSMUSG00000001052.8	protein_coding	Sec24b	16.55	16.77	15.39	10.6	18.63	11.88	13.05	20.85	14.02
ENSMUSG00000001053.9	protein_coding	N4bp3	4.6	5.05	4.9	5.26	6.35	6.02	5.42	5.36	5.62
ENSMUSG00000001054.3	protein_coding	Rmnd5b	13.6	11.32	16.04	16.54	16.31	19.07	17.78	15.24	19.95
ENSMUSG00000001056.3	protein_coding	Nhp2	37.52	53.59	33.44	50.16	56.24	45.25	58.79	63.31	56.43
ENSMUSG00000001062.11	protein_coding	1300018I17Rik	9.32	5.65	10.88	8.75	8.73	10.67	9.04	7.19	11.83
ENSMUSG00000001065.8	protein_coding	Zfp276	14.89	10.62	15.95	14.04	14.13	16.91	13.19	12.67	17.18
ENSMUSG00000001076.6	protein_coding	C1ql4	0.15	0.1	0.14	0.14	0.16	0.2	0.04	0.14	0.14
ENSMUSG00000001082.6	protein_coding	Mfsd10	42.59	41.1	40.22	37.15	42.58	37.23	39.51	40.08	40.24
ENSMUSG00000001089.8	protein_coding	Luzp1	23.3	20.39	27.37	20.03	21.37	26.47	20.38	24.15	22.82
ENSMUSG00000001095.5	protein_coding	Slc13a2	0.02	0.01	0	0	0	0.05	0	0	0
ENSMUSG00000001098.8	protein_coding	Kctd10	100.06	58.31	108.01	114.43	80.82	118.46	113.26	89.14	119.23
ENSMUSG00000001100.4	protein_coding	Poldip2	41.56	36.98	42.19	47.57	47.03	52.95	53.36	54.16	62.88
ENSMUSG00000001103.6	protein_coding	Sebox	0.14	0.08	0.11	0.17	0.35	0.22	0.26	0.14	0.29
ENSMUSG00000001105.9	protein_coding	Ift20	31.08	32.83	39.15	38.55	37.68	41.41	37.57	44.43	46.9
ENSMUSG00000001119.6	protein_coding	Col6a1	166.62	46.75	240.74	188.15	87.87	230.68	158.17	67.34	201.79
ENSMUSG00000001120.8	protein_coding	Pcbp3	13.19	9.5	11.92	14.6	12.32	14.61	14.59	12.69	14.84
ENSMUSG00000001123.9	protein_coding	Lgals9	52.43	60.59	29.09	48.6	80.79	33.16	52.58	82.72	39.33
ENSMUSG00000001127.5	protein_coding	Araf	31.05	26.01	39.58	33.47	31.79	38.76	30.86	30.26	41.42
ENSMUSG00000001128.7	protein_coding	Cfp	3.37	2.55	3.26	2.46	3.56	2.77	2.62	3.44	2.47
ENSMUSG00000001131.5	protein_coding	Timp1	272.63	441.05	179.16	260.42	260.02	172.11	302.71	439.14	220.01
ENSMUSG00000001134.3	protein_coding	Uxt	26.19	35.45	25.42	20.26	29.11	18.61	19.67	25.82	20.87
ENSMUSG00000001138.7	protein_coding	Cnnm3	9.42	5.16	8.22	6.26	5.87	4.96	5.76	5.81	5.96
ENSMUSG00000001143.7	protein_coding	Lman2l	3.27	2.77	4.41	2.56	3.52	3.78	2.67	3.03	3.87
ENSMUSG00000001150.5	protein_coding	Mcm3ap	12.37	9.32	12.19	11.2	12.18	14.67	13.33	14	14.68
ENSMUSG00000001151.8	protein_coding	Pcnt	9.96	8.13	10	7.49	9.86	8.86	9.49	10.42	9.03
ENSMUSG00000001155.7	protein_coding	Ftcd	0.01	0	0	0	0	0.01	0	0.01	0
ENSMUSG00000001156.7	protein_coding	Mxd1	4.68	3.04	5.97	4.55	3.85	6.08	4.79	4.13	5.75
ENSMUSG00000001157.7	protein_coding	Gmcl1	10.69	5.53	10.87	9.54	7.39	9.25	9.7	8.26	9.71
ENSMUSG00000001158.7	protein_coding	Snrnp27	41.05	43.62	45.14	40.01	40.36	40.11	39.38	41.68	43.85
ENSMUSG00000001166.10	protein_coding	Oas1c	1.57	1.9	0.61	0.75	2.23	0.81	1.29	2.14	1.13
ENSMUSG00000001168.9	protein_coding	Oas1h	0	0.04	0	0.02	0.34	0.02	0.08	0.38	0.03
ENSMUSG00000001173.9	protein_coding	Ocrl	11.67	8.81	10.32	9.12	9.29	9.64	10.01	10.35	11.42
ENSMUSG00000001175.7	protein_coding	Calm1	177.25	190.76	169.81	163.2	157.92	183.24	193.45	206.86	223.11
ENSMUSG00000001211.8	protein_coding	Agpat3	30.19	31.49	38.08	32.66	31.72	36.62	34.51	32.62	38.74
ENSMUSG00000001225.6	protein_coding	Slc26a3	0.03	0	0.03	0	0	0	0	0.01	0
ENSMUSG00000001227.5	protein_coding	Sema6b	1.41	3.79	0.6	0.53	2.2	0.5	0.81	2.55	0.59
ENSMUSG00000001228.8	protein_coding	Uhrf1	67.87	53.51	55.39	76.61	78.55	63.58	81.24	76.84	69.06
ENSMUSG00000001229.6	protein_coding	Dpp9	14.07	9.88	12.33	16.24	17.08	15.28	18.45	17.45	15.88
ENSMUSG00000001240.7	protein_coding	Ramp2	1.25	0.3	2.26	0.56	0.5	1.29	0.67	0.61	1.48
ENSMUSG00000001247.9	protein_coding	Lsr	1.99	1.44	1.49	1.3	1.28	1.38	1.15	1.33	1.32
ENSMUSG00000001248.7	protein_coding	Gramd1a	15.36	13.72	15.45	12.47	12.69	12.82	11.32	12.34	13.93
ENSMUSG00000001249.8	protein_coding	Hpn	0.33	0.19	0	0.05	0.05	0.01	0.08	0.05	0.06
ENSMUSG00000001260.5	protein_coding	Gabrg1	0	0	0	0	0	0	0	0	0.01
ENSMUSG00000001270.8	protein_coding	Ckb	3.42	1.05	5.51	6.32	3.23	8.61	5.34	4.1	5.48
ENSMUSG00000001280.6	protein_coding	Sp1	32.62	25.56	32.96	26.24	29.8	30.56	30.51	32.07	31.25
ENSMUSG00000001281.3	protein_coding	Itgb7	0.38	1.01	0.44	0.4	1.57	0.76	0.64	1.2	0.67
ENSMUSG00000001285.6	protein_coding	Myg1	43.9	45.24	48.27	44.48	52.13	49.83	46.89	49.67	51
ENSMUSG00000001288.8	protein_coding	Rarg	26.64	23.87	24.95	24.29	27.66	25.74	25.21	30.72	25.92
ENSMUSG00000001289.6	protein_coding	Pfdn5	149.39	113.48	163.09	181.9	151.48	175.9	160.06	162.31	193.18
ENSMUSG00000001300.8	protein_coding	Efnb2	15	15.14	12.84	11.14	17.06	14.33	13.33	18.68	16.75
ENSMUSG00000001305.5	protein_coding	Rrp15	18.91	21.19	17.76	19.2	21.17	17.58	22.24	23.24	20.53
ENSMUSG00000001313.6	protein_coding	Rnd2	11.76	6.65	13.31	13.55	13.59	16.21	13.84	10.61	15.86
ENSMUSG00000001323.10	protein_coding	Srr	6.13	4.92	7.76	8.32	9.23	9.99	8.54	8.25	12.19
ENSMUSG00000001333.8	protein_coding	Sync	1.59	0.75	1.4	1.67	1.79	2.16	1.72	0.92	2.03
ENSMUSG00000001334.9	protein_coding	Fndc5	0.06	0.08	0.08	0.06	0.12	0.05	0.12	0.1	0.08
ENSMUSG00000001348.8	protein_coding	Acp5	0.3	0.46	0.7	0.4	0.41	0.83	0.27	0.75	0.83
ENSMUSG00000001349.4	protein_coding	Cnn1	5.1	0.84	3.06	10.95	2.97	8.27	14.01	4.07	9.44
ENSMUSG00000001366.8	protein_coding	Fbxo9	16.14	12.31	17.02	16.02	12.5	15.87	14.47	12.98	15.14
ENSMUSG00000001376.9	protein_coding	Ccdc132	29.99	20.7	25.93	29.83	28.16	28.03	31.42	27.14	31.39
ENSMUSG00000001379.8	protein_coding	Apbb3	4.8	4.48	5.48	4.23	4.82	6.11	4.24	6.11	6.77
ENSMUSG00000001380.6	protein_coding	Hars	39.35	35.03	40.3	52.3	48.68	52.06	58.9	56.51	59.29
ENSMUSG00000001383.8	protein_coding	Zmat2	18.69	12.96	19	21.69	19.82	23.55	20.18	19.14	24.32
ENSMUSG00000001403.7	protein_coding	Ube2c	52.16	55.79	62.33	54.51	40.48	51.33	57.13	62.88	69.42
ENSMUSG00000001415.5	protein_coding	Smg5	34.57	32.07	36.47	37.44	39.37	44	47.24	43.93	48.85
ENSMUSG00000001416.7	protein_coding	Cct3	117.05	138.74	110.49	150.94	156.63	150.61	193.38	188.21	194.28
ENSMUSG00000001417.4	protein_coding	Rhbg	0.09	0.29	0.1	0.02	0.16	0.05	0.05	0.14	0
ENSMUSG00000001418.6	protein_coding	0610031J06Rik	127.46	82.17	137.73	130.99	128.81	135.23	119.14	104.5	120.95
ENSMUSG00000001419.10	protein_coding	Mef2d	15.53	14.23	14.57	10.31	14.03	13.47	10.8	15.48	13.65
ENSMUSG00000001420.7	protein_coding	Tmem79	3.03	2.13	2.64	2.02	2.37	2.44	2.07	2.33	2
ENSMUSG00000001424.7	protein_coding	Snd1	51.1	61.61	48.82	50.25	59.27	55.86	59.62	57.77	65.27
ENSMUSG00000001435.8	protein_coding	Col18a1	10.07	9.32	9.73	10.7	9.42	7.65	10.81	8.7	9.16
ENSMUSG00000001436.9	protein_coding	Slc19a1	8.91	11.47	6.07	8.67	9.54	8.04	10.86	9.26	8.31
ENSMUSG00000001440.5	protein_coding	Kpnb1	91.96	97.52	87.01	102.2	124.22	104.43	133.81	143.13	130.42
ENSMUSG00000001441.7	protein_coding	Npepps	23.4	24.96	24.31	20.1	27.78	23.31	25.18	33.71	27.48
ENSMUSG00000001444.2	protein_coding	Tbx21	0.01	0	0	0	0.01	0.02	0	0.01	0
ENSMUSG00000001445.4	protein_coding	Mrpl10	22.41	21.54	26.25	27.2	27.1	31.83	27.55	27.98	34.18
ENSMUSG00000001467.4	protein_coding	Cyp51	56.36	160.43	70.18	44.29	94.51	48.97	61.6	92.24	60.98
ENSMUSG00000001472.9	protein_coding	Tcf25	123.11	108.75	128.96	113.26	107.73	119.63	118.69	113.71	134.43
ENSMUSG00000001473.6	protein_coding	Tubb6	147.7	202.2	174.71	158.27	177.12	165.37	180.56	246.63	225.13
ENSMUSG00000001482.8	protein_coding	Def8	18.22	13.46	19.74	13.27	12.68	16.03	14.74	13.34	17.75
ENSMUSG00000001493.9	protein_coding	Meox1	0.18	0.41	0.32	0.21	0.27	0.18	0.35	0.21	0.09
ENSMUSG00000001494.5	protein_coding	Sost	0.04	0.01	0.04	0.03	0	0	0	0	0
ENSMUSG00000001496.7	protein_coding	Nkx2-1	0	0	0	0	0	0	0	0	0.01
ENSMUSG00000001497.11	protein_coding	Pax9	0.55	0.86	0.73	0.19	0.11	0.13	0.12	0.14	0.18
ENSMUSG00000001504.8	protein_coding	Irx2	56.39	36.98	69.17	24.38	27.59	15.26	28.01	20.22	15.3
ENSMUSG00000001506.9	protein_coding	Col1a1	103.27	78.32	189.67	102.79	91.87	159.52	118.08	131.69	199.81
ENSMUSG00000001507.9	protein_coding	Itga3	5.27	2.76	5.7	3.68	3.52	6.59	8.51	7.43	8.05
ENSMUSG00000001508.9	protein_coding	Sgca	0	0.04	0.26	0.06	0.01	0.11	0.07	0.02	0.08
ENSMUSG00000001510.7	protein_coding	Dlx3	0	0	0.03	0.07	0	0.06	0.02	0	0
ENSMUSG00000001517.8	protein_coding	Foxm1	36.42	27.15	33.1	27.78	30.07	25.71	30.75	34.35	30.45
ENSMUSG00000001518.9	protein_coding	Itfg2	8.09	8.07	8.06	7.14	8.83	9.25	8.27	8	9.19
ENSMUSG00000001520.6	protein_coding	Nrip2	1.56	1.8	1.75	1.32	2.02	2.22	1.7	1.1	1.67
ENSMUSG00000001521.6	protein_coding	Tulp3	15.38	11.57	13.28	13.68	14.02	14.01	16.38	16.12	13.75
ENSMUSG00000001524.8	protein_coding	Gtf2h4	14.57	13.43	14.44	14.17	14.79	16.71	16.08	14.84	15.72
ENSMUSG00000001525.9	protein_coding	Tubb5	647.05	446.18	603.61	704.63	540.29	597.68	713.58	584.16	644.19
ENSMUSG00000001542.6	protein_coding	Ell2	9.53	17.49	11.34	7.1	10.81	6.24	9.59	12.7	6.35
ENSMUSG00000001552.8	protein_coding	Jup	14.47	2.49	14.28	17.17	8.96	23.69	18.43	10.38	20.76
ENSMUSG00000001555.4	protein_coding	Fkbp10	45.79	52.89	58.97	54.61	54.83	69.14	61.04	66.24	72.64
ENSMUSG00000001558.4	protein_coding	Klhl10	5.47	5.4	5.81	5.43	6.43	6.94	6.58	6.85	5.95
ENSMUSG00000001566.8	protein_coding	Mnx1	0	0	0	0	0	0	0	0	0
ENSMUSG00000001569.9	protein_coding	Nom1	15.21	17.01	14.01	11.99	16.91	15.96	15.54	16.22	13.96
ENSMUSG00000001576.8	protein_coding	Ergic1	64.93	47.05	61.26	60.1	61.86	70.35	79.14	75.2	85.02
ENSMUSG00000001583.6	protein_coding	Tnk1	0.11	0.06	0.11	0.19	0.31	0.04	0.19	0.29	0.19
ENSMUSG00000001588.6	protein_coding	Acap1	0.05	0.03	0	0.03	0.05	0.09	0.08	0.02	0.09
ENSMUSG00000001604.8	protein_coding	Tcea3	4.38	1.37	4.64	2.97	1.41	3.48	1.9	1.13	2.72
ENSMUSG00000001622.9	protein_coding	Csn3	0	0	0.03	0	0	0	0	0	0
ENSMUSG00000001627.5	protein_coding	Ifrd1	70.42	155.26	82	66.03	96.8	72.41	79.44	95.21	91.58
ENSMUSG00000001630.7	protein_coding	Stk38l	9.54	13.49	10.62	8.22	10.76	10.46	10.1	11.29	10.37
ENSMUSG00000001632.9	protein_coding	Brpf1	14.75	13.11	15.23	12.54	14.11	14.68	14.02	15.01	14.83
ENSMUSG00000001642.11	protein_coding	Akr1b3	105.77	108.45	148.95	123.43	141.56	158.32	232.1	200.63	139.73
ENSMUSG00000001655.6	protein_coding	Hoxc13	1.31	0.38	0.95	0.37	0.08	0.14	0.28	0.12	0.33
ENSMUSG00000001656.3	protein_coding	Hoxc11	0.23	0.3	0.33	0	0.01	0	0	0	0
ENSMUSG00000001657.6	protein_coding	Hoxc8	0.18	0.14	0.26	0	0.03	0.06	0.01	0.02	0.02
ENSMUSG00000001661.4	protein_coding	Hoxc6	4.28	3.08	4.2	4.2	2.86	4.17	4.44	3.24	4.23
ENSMUSG00000001663.4	protein_coding	Gstt1	6.35	3.68	6.56	6.42	4.05	5.52	7.06	6.54	6.33
ENSMUSG00000001665.4	protein_coding	Gstt3	2.89	2.62	2.27	2.85	2.7	4.27	2.76	5.02	4.56
ENSMUSG00000001666.8	protein_coding	Ddt	30.29	18.77	31.35	35.95	28.15	40.11	36.08	35.04	39.02
ENSMUSG00000001670.7	protein_coding	Tat	0	0	0	0	0	0	0	0	0
ENSMUSG00000001672.8	protein_coding	Marveld3	0.01	0.02	0.01	0	0	0.01	0	0	0.03
ENSMUSG00000001674.5	protein_coding	Ddx18	31.7	38	29.62	31.13	34.12	32.62	36.63	37.91	40.62
ENSMUSG00000001687.9	protein_coding	Ubl3	22.62	19.03	27.88	19.76	18.75	25.17	19.61	17.93	24.54
ENSMUSG00000001700.8	protein_coding	Gramd3	2.19	3.26	3.61	2.71	2.85	3.79	2.53	3.33	3.82
ENSMUSG00000001707.7	protein_coding	Eef1e1	15.71	27.95	15.53	21.33	24.14	19.25	22.36	26.99	24.22
ENSMUSG00000001729.7	protein_coding	Akt1	95.73	81.35	91.11	82.55	81.38	90.1	98.71	92.94	110.73
ENSMUSG00000001739.7	protein_coding	Cldn15	5.25	0.51	12.87	3.51	3.97	15.91	3.77	1.61	4.56
ENSMUSG00000001741.5	protein_coding	Il16	12.25	6.41	11.13	4.9	5.32	3.28	7.19	5.87	2.25
ENSMUSG00000001750.9	protein_coding	Tcirg1	72.63	72.08	60.79	54.82	98.44	55.7	52.1	80.8	67.9
ENSMUSG00000001751.8	protein_coding	Naglu	18.2	15.52	20.19	18.4	24.33	19.75	14.72	16.85	18.62
ENSMUSG00000001755.6	protein_coding	Coasy	7.64	13.71	9.28	10.75	13.77	10.36	9.14	11.42	11.25
ENSMUSG00000001761.6	protein_coding	Smo	41.05	28.74	40.48	35.53	29.49	40.94	35.82	31.34	43.2
ENSMUSG00000001763.8	protein_coding	Tspan33	0.45	0.49	0.39	0.28	0.48	0.36	0.25	0.41	0.29
ENSMUSG00000001767.5	protein_coding	Crnkl1	15.24	13.86	15.87	14.78	15.79	15.13	16.46	17.83	16.02
ENSMUSG00000001768.9	protein_coding	Rin2	34.33	10.01	44.51	25.32	18.43	24.59	21.66	15.2	21.91
ENSMUSG00000001773.7	protein_coding	Folh1	0	0.01	0.02	0	0.03	0.07	0.01	0.02	0.12
ENSMUSG00000001774.7	protein_coding	Chordc1	17.5	18.89	18.9	17.08	17.35	16.54	18.4	18	19.27
ENSMUSG00000001783.3	protein_coding	D10Wsu52e	59.21	56.78	56.65	67.26	61.2	68.56	76.48	68.5	76.25
ENSMUSG00000001785.5	protein_coding	Pwp1	21.06	20.62	18.41	24.34	22.46	22.91	26.16	24.67	27.66
ENSMUSG00000001786.8	protein_coding	Fbxo7	12.54	8.51	10.79	10.14	11.01	11.46	11.87	10.19	11.22
ENSMUSG00000001794.6	protein_coding	Capns1	90.47	79.51	106.5	90.04	98.11	101.14	102.67	103.43	121.09
ENSMUSG00000001802.9	protein_coding	Lrp3	0.27	0.05	0.13	0.19	0.04	0.12	0.08	0.04	0.05
ENSMUSG00000001804.8	protein_coding	Dsg4	0	0	0	0	0	0	0	0	0
ENSMUSG00000001815.8	protein_coding	Evx2	0	0	0	0	0.02	0	0	0	0
ENSMUSG00000001819.4	protein_coding	Hoxd13	0	0.01	0	0	0	0	0	0	0
ENSMUSG00000001823.4	protein_coding	Hoxd12	0	0	0	0	0	0	0	0	0
ENSMUSG00000001827.5	protein_coding	Folr1	0.13	0.25	0.25	0.38	0.31	0.79	0.22	0.36	0.8
ENSMUSG00000001829.9	protein_coding	Clpb	16.91	17.39	14.61	17.32	18.9	19.17	18.82	18.58	21.59
ENSMUSG00000001833.9	protein_coding	2007-09-01	98.17	71.48	97.09	97.66	78.94	88.43	100.57	84.2	98.27
ENSMUSG00000001844.4	protein_coding	Zdhhc4	27.53	16.7	26.92	22.06	21.16	25.18	22.89	20.61	26.78
ENSMUSG00000001847.8	protein_coding	Rac1	127.56	100.35	128.81	127.45	110.1	130.66	132.9	124.48	141.11
ENSMUSG00000001855.8	protein_coding	Nup214	10.93	9.34	9.01	8.93	9.92	10.64	10.6	15.17	11.34
ENSMUSG00000001864.7	protein_coding	Aif1l	11.43	4.76	7.04	14.7	12	12.34	17.82	16.76	16.56
ENSMUSG00000001865.1	protein_coding	Cpa3	0	0	0.02	0	0	0	0	0	0
ENSMUSG00000001870.8	protein_coding	Ltbp1	85.39	25.97	39.9	66.65	74.83	49.62	84.24	78.17	53.73
ENSMUSG00000001891.10	protein_coding	Ugp2	29.27	21.73	30.13	33.94	26.46	36.33	34.56	33.46	38.38
ENSMUSG00000001901.8	protein_coding	Kcnh6	0.01	0.02	0.01	0.03	0.03	0.08	0.02	0.02	0.03
ENSMUSG00000001909.7	protein_coding	Trmt1	29.32	31.14	28.73	30.91	35.83	31.9	31.73	28.38	35.35
ENSMUSG00000001910.4	protein_coding	Nacc1	40.55	37.26	39.58	33.65	39.14	39.77	40.01	43.24	43.31
ENSMUSG00000001911.9	protein_coding	Nfix	59.9	26.27	52.52	48.36	36.08	53.99	47.18	35.33	49.08
ENSMUSG00000001918.10	protein_coding	Slc1a5	22.53	45.08	21.28	22.87	39.96	22.05	25.94	27.21	28.13
ENSMUSG00000001924.9	protein_coding	Uba1	115.77	108	121.97	115.91	105.14	115.38	131.12	126	135.52
ENSMUSG00000001930.10	protein_coding	Vwf	0.51	0.36	0.24	0.32	0.43	0.15	0.24	0.21	0.22
ENSMUSG00000001942.7	protein_coding	Siae	6.03	3.48	6.42	5.85	5.22	6.46	5.25	5.33	6.45
ENSMUSG00000001943.6	protein_coding	Vsig2	0	0	0	0	0.03	0	0	0	0
ENSMUSG00000001946.7	protein_coding	Esam	0.15	0.4	0.19	0.32	0.27	0.25	0.13	0.14	0.12
ENSMUSG00000001948.8	protein_coding	Spa17	1.1	1.01	1.55	0.9	0.67	0.63	0.84	0.74	0.78
ENSMUSG00000001962.7	protein_coding	Fam50a	59.6	37.6	55.26	61.05	49.51	57.12	50.52	38.47	51.29
ENSMUSG00000001964.8	protein_coding	Emd	41.59	33.96	41.69	43.37	34.15	40.86	40.52	33.79	41.09
ENSMUSG00000001983.7	protein_coding	Taco1	3.19	2.5	4.09	3.72	4.53	4.61	4.52	4.85	5.08
ENSMUSG00000001985.8	protein_coding	Grik3	0	0.01	0	0	0	0	0	0	0
ENSMUSG00000001986.9	protein_coding	Gria3	1.93	0.58	2.96	2.69	1.28	4.39	2.33	1.36	6.47
ENSMUSG00000001988.8	protein_coding	Npas1	0.18	0.28	0.25	0.24	0.3	0.29	0.27	0.24	0.27
ENSMUSG00000001995.7	protein_coding	Sipa1l2	76.29	50.24	67.57	50.93	65.25	60.14	64.09	64.68	54.68
ENSMUSG00000001998.8	protein_coding	Ap4e1	5.72	5.26	5.62	4.29	6.07	5.23	4.96	6.42	5.73
ENSMUSG00000001999.9	protein_coding	Blvra	16.89	14.06	18.26	21.83	19.3	19.23	21.05	20.79	24.32
ENSMUSG00000002006.6	protein_coding	Pdzd4	11.95	9.11	10.95	9.17	6.37	8.31	8.25	6.25	7.31
ENSMUSG00000002007.5	protein_coding	Srpk3	1.34	0.92	0.68	0.41	0.6	0.33	0.57	0.65	0.61
ENSMUSG00000002010.10	protein_coding	Idh3g	77.67	78.22	81.49	67.37	57.21	58.45	64.36	59.11	66.66
ENSMUSG00000002012.7	protein_coding	Pnck	0.16	0.26	0.21	0.18	0.2	0.07	0.04	0.06	0
ENSMUSG00000002014.6	protein_coding	Ssr4	102.58	139.64	106.75	97.14	90.59	83.78	95.69	96.39	105.1
ENSMUSG00000002015.5	protein_coding	Bcap31	109.01	135.79	119.2	119.35	115.44	111.74	114.84	125.24	117.89
ENSMUSG00000002017.9	protein_coding	Fam98a	16.71	15.82	18.44	15.6	15.01	15.02	16.97	17.51	20.45
ENSMUSG00000002020.8	protein_coding	Ltbp2	37.2	23.66	44.45	27.58	18.77	29.61	25.05	16.97	31.05
ENSMUSG00000002028.6	protein_coding	Mll1	7.29	4.22	4.96	3.35	5.35	4.11	4.45	6.12	4.64
ENSMUSG00000002031.4	protein_coding	Ift46	49.47	33.44	55.66	47.4	42.06	52.4	51.19	45.7	49.55
ENSMUSG00000002032.9	protein_coding	Tmem25	0.3	0.12	0.22	0.26	0.2	0.34	0.23	0.06	0.2
ENSMUSG00000002033.7	protein_coding	Cd3g	0	0	0	0	0	0	0	0	0
ENSMUSG00000002043.10	protein_coding	Trappc6a	8.55	9.6	8.18	7.56	8.2	8.9	6.9	9.38	9.49
ENSMUSG00000002052.6	protein_coding	Supt6h	16.84	14.34	17.51	15.27	19.72	18.87	18.57	20	20.02
ENSMUSG00000002055.3	protein_coding	Spag5	26.8	28.53	32.2	29.42	35.37	29.19	31.54	36.46	33.93
ENSMUSG00000002057.4	protein_coding	Foxn1	0.09	0.02	0.03	0.04	0.02	0.1	0.07	0.08	0.15
ENSMUSG00000002058.7	protein_coding	Unc119	16.73	11.91	18.23	16.91	15.59	21.08	16.49	15.75	21.4
ENSMUSG00000002059.11	protein_coding	Rab34	47.18	46.91	52.95	58.4	62.91	64.45	58.51	67.16	72.9
ENSMUSG00000002064.9	protein_coding	Sdf2	28.68	24.66	34.44	37.13	35.67	40	33.53	35.3	37.55
ENSMUSG00000002068.10	protein_coding	Ccne1	11.37	11.86	12.38	11.85	11.03	12.5	11.6	12.48	14.98
ENSMUSG00000002076.5	protein_coding	Hsf2bp	0	0.14	0.01	0.04	0.33	0.03	0.09	0.14	0
ENSMUSG00000002083.6	protein_coding	Bbc3	3.94	4.2	4.75	5.42	5.29	8.61	5.44	4.05	9.21
ENSMUSG00000002100.8	protein_coding	Mybpc3	0	0	0	0	0.01	0	0	0	0
ENSMUSG00000002102.9	protein_coding	Psmc3	103.43	91.55	110.66	122.55	116.44	123.26	127.68	130.18	140.28
ENSMUSG00000002103.8	protein_coding	Acp2	10.59	8.98	11.4	10.85	11.69	12.81	10.74	9.46	12.35
ENSMUSG00000002104.5	protein_coding	Rapsn	1.06	0.28	0.68	0.29	0.16	0.28	0.16	0.16	0.4
ENSMUSG00000002105.8	protein_coding	Slc39a13	28.48	24.01	28.58	25.25	24.67	28.17	28.08	32.29	31.32
ENSMUSG00000002107.9	protein_coding	Celf2	42.1	16.64	49.79	47.14	29.35	64.48	50.02	36.54	70.15
ENSMUSG00000002108.4	protein_coding	Nr1h3	1.47	1.2	2.79	1.62	1.75	1.41	1.08	1.41	1.61
ENSMUSG00000002109.7	protein_coding	Ddb2	5.57	2.88	5.16	5.91	5.56	7.84	5.23	4.69	7.4
ENSMUSG00000002111.8	protein_coding	Sfpi1	0	0	0	0	0	0	0	0	0
ENSMUSG00000002129.5	protein_coding	Sf3a1	15.16	13.05	15.14	17.26	17.4	19.31	19.05	19.57	21.06
ENSMUSG00000002147.11	protein_coding	Stat6	21.91	18.66	22.64	22.67	23.51	25.28	22.48	21.82	27.76
ENSMUSG00000002190.7	protein_coding	Clgn	0.33	0.29	0.34	0.35	0.45	0.53	0.42	0.53	0.57
ENSMUSG00000002204.8	protein_coding	Napsa	0	0	0	0	0	0	0	0	0
ENSMUSG00000002205.9	protein_coding	Vrk3	10.68	9.83	11.87	9.94	11.14	9.68	9.92	11.97	11.38
ENSMUSG00000002210.5	protein_coding	1500002O20Rik	10.13	9.11	10.61	10.03	11.96	10.67	10.68	11.09	11.74
ENSMUSG00000002221.7	protein_coding	Paxip1	14.99	13.54	15.02	12.87	15.6	14.08	14.13	15.43	15.29
ENSMUSG00000002222.8	protein_coding	Rmnd5a	23.25	22.09	28.73	20.42	23.51	25.78	21.69	24.03	23.72
ENSMUSG00000002227.8	protein_coding	Mov10	12.81	13.43	8.2	8.41	17.61	7.62	10.92	17.92	10.24
ENSMUSG00000002228.6	protein_coding	Ppm1j	0.41	1.04	0.44	0.22	0.52	0.55	0.22	0.64	0.5
ENSMUSG00000002233.6	protein_coding	Rhoc	117.46	152.92	130.78	119.45	140.39	127.07	125.25	143.76	153.9
ENSMUSG00000002240.6	protein_coding	4930432K09Rik	0	0	0	0	0	0	0	0	0
ENSMUSG00000002249.10	protein_coding	Tead3	21.36	10.81	18.02	17.9	16.36	22.13	20.92	18.52	21.21
ENSMUSG00000002250.9	protein_coding	Ppard	8.31	7.1	7.95	5.99	7.9	6.68	6.91	7.99	6.73
ENSMUSG00000002257.6	protein_coding	Def6	0.57	0.4	0.64	0.49	0.3	0.85	0.54	0.31	0.8
ENSMUSG00000002265.8	protein_coding	Peg3	0.17	0.1	0.15	0.08	0.1	0.21	0.08	0.1	0.12
ENSMUSG00000002266.9	protein_coding	Zim1	0	0.01	0.04	0	0.02	0	0	0.02	0
ENSMUSG00000002274.6	protein_coding	Metrn	21.31	19	28.75	22.29	27.46	37.47	27.41	37.99	44.97
ENSMUSG00000002279.11	protein_coding	Lmf1	7.35	8.74	6.83	9.61	9.47	8.62	8.91	9.49	9.75
ENSMUSG00000002280.4	protein_coding	Narfl	11.01	6.9	13.07	13.59	11.63	17.43	13.45	11.59	17.21
ENSMUSG00000002289.9	protein_coding	Angptl4	8.24	69.87	40.29	8.96	53.46	40.33	15.34	55.17	62.58
ENSMUSG00000002290.7	pseudogene	Rab11b-ps2	0.43	0.41	0.89	0.38	0.56	0.61	0.44	0.54	0.6
ENSMUSG00000002297.9	protein_coding	Dbf4	38.92	45.33	43.75	32.99	38.62	31.45	36.15	43.45	39.86
ENSMUSG00000002307.9	protein_coding	Daxx	16.93	22.68	13.54	14.02	28.55	13.88	15.99	20.63	13.65
ENSMUSG00000002308.9	protein_coding	Cd320	46.92	39.39	55.59	63.6	53.03	64.53	62.98	71.06	72.83
ENSMUSG00000002319.9	protein_coding	Ipo4	27.46	33.34	29.81	29.73	36.11	31.36	37.18	39.84	39.89
ENSMUSG00000002320.9	protein_coding	Tm9sf1	39.78	39.98	40.9	37.24	41.08	44.32	39.01	43.13	48.63
ENSMUSG00000002324.7	protein_coding	Rec8	0.12	0.29	0.13	0.11	0.14	0.04	0	0.14	0.05
ENSMUSG00000002325.8	protein_coding	Irf9	44.06	51.7	8.22	24.88	59.22	8.37	29.26	50.08	7.69
ENSMUSG00000002326.5	protein_coding	Gmpr2	9.12	7.57	8.83	10.55	9.73	11.02	10.11	10.19	11.68
ENSMUSG00000002329.6	protein_coding	Mdp1	6.37	5.88	7.36	7.86	6.98	8.06	7.85	7.04	8.57
ENSMUSG00000002332.9	protein_coding	Dhrs1	21.73	20.01	23.83	21.18	20.74	27.15	24.47	28.16	29.85
ENSMUSG00000002341.8	protein_coding	Ncan	0.01	0.01	0.01	0.01	0.04	0.06	0.01	0.01	0.04
ENSMUSG00000002342.9	protein_coding	Tmem161a	21.98	29.39	28.19	22.21	24.11	26.33	22.79	23.78	30.23
ENSMUSG00000002343.5	protein_coding	Armc6	11.41	7.99	13.11	11.61	9.15	13.11	11.35	9.37	13.58
ENSMUSG00000002345.10	protein_coding	2310045N01Rik	23.3	19.27	27.63	22.83	20.53	27.35	19.35	22.42	28.92
ENSMUSG00000002346.9	protein_coding	Slc25a42	1.64	0.86	1.91	1.37	1.3	2.47	1.29	1.18	2.77
ENSMUSG00000002365.8	protein_coding	Snx9	86.39	73.27	95.52	72.89	80.41	79.6	82.05	86.73	64.83
ENSMUSG00000002372.7	protein_coding	Ranbp3	41.95	35.82	43.09	53.63	54.18	60.44	61.11	60.25	61.49
ENSMUSG00000002379.6	protein_coding	Ndufa11	11.42	8.46	12.77	17.2	12.82	17.63	16.44	14.57	20.4
ENSMUSG00000002384.2	protein_coding	Bmp8b	0.2	0.18	0.15	0.17	0.25	0.14	0.31	0.15	0.24
ENSMUSG00000002393.8	protein_coding	Nr2f6	30.89	29.97	37.6	28.4	32.22	33.8	32.69	32.82	37.86
ENSMUSG00000002395.8	protein_coding	Use1	48.36	47.77	48.61	44.35	41.8	44.2	41.52	43.21	50.72
ENSMUSG00000002396.8	protein_coding	Ocel1	12.34	7.75	11.5	8.58	9.49	10.42	10.72	9.77	10.94
ENSMUSG00000002409.10	protein_coding	Dyrk1b	5.45	3.18	4.86	4.29	4.71	5.44	4.82	4.64	4.67
ENSMUSG00000002413.8	protein_coding	Braf	10.54	7.31	9.27	6.74	8.19	8.5	7.12	8.35	8.97
ENSMUSG00000002416.7	protein_coding	Ndufb2	40.64	29.59	49.96	48.68	36.31	47.69	42.61	43.02	50.76
ENSMUSG00000002428.6	protein_coding	Hltf	11.16	10.35	11.12	9.32	11.24	10.68	9.23	12.19	11.35
ENSMUSG00000002455.8	protein_coding	Prpf6	23.79	19.2	25.5	24.4	24.68	27.51	26.24	25.39	28.4
ENSMUSG00000002458.7	protein_coding	Rgs19	15.7	14.28	14.74	13.12	17.77	13.66	19.23	19.33	17.74
ENSMUSG00000002459.10	protein_coding	Rgs20	0.05	0.02	0.11	0.05	0.17	0.07	0.35	0.1	0.04
ENSMUSG00000002475.9	protein_coding	Abhd3	0.5	0.28	0.68	0.64	0.43	1.03	0.58	0.57	0.96
ENSMUSG00000002477.4	protein_coding	Snrpd1	69.42	71.48	73.03	96.01	87	94.88	104.09	106.21	111.85
ENSMUSG00000002486.9	protein_coding	Tchp	5.68	4.84	6.05	4.65	5.28	6.35	5.11	4.07	6.19
ENSMUSG00000002489.8	protein_coding	Tiam1	8.66	9.3	8.45	7.12	8.11	7.89	8.25	9.72	7.11
ENSMUSG00000002496.8	protein_coding	Tsc2	23.67	14.09	23.22	23.42	24.24	28.11	26	25.45	29.67
ENSMUSG00000002500.8	protein_coding	Rpl3l	0.09	0	0	0	0.03	0	0	0	0.03
ENSMUSG00000002504.7	protein_coding	Slc9a3r2	11.06	5.1	12.61	14.7	9.36	19.03	11.27	8.36	14.45
ENSMUSG00000002524.9	protein_coding	Puf60	100.97	87.97	106.88	113.9	109.89	121.47	127.24	118.51	126.51
ENSMUSG00000002546.9	protein_coding	Golga2	26.15	23.6	29.55	24.1	21.15	25.82	21.8	23.45	28.14
ENSMUSG00000002550.9	protein_coding	Uck1	31.48	22.28	35.18	29.9	30.33	32.16	29.9	30.44	34.93
ENSMUSG00000002565.9	protein_coding	Scin	0.23	0.51	0.11	0.13	0.22	0.19	0.12	0.11	0.2
ENSMUSG00000002578.8	protein_coding	Ikzf4	0.68	0.44	0.49	0.7	0.38	0.79	0.41	0.75	0.68
ENSMUSG00000002580.7	protein_coding	1810046J19Rik	22.62	13.98	24.96	29.22	23.54	28.01	23.79	22.06	28.93
ENSMUSG00000002588.5	protein_coding	Pon1	0	0.02	0	0.02	0	0.02	0	0.02	0.02
ENSMUSG00000002602.9	protein_coding	Axl	198.63	151.68	196.67	181.47	252.98	229.84	236.64	254.49	247.79
ENSMUSG00000002603.9	protein_coding	Tgfb1	7.12	11.6	7.76	5.96	9	5.4	4.89	7.92	5.21
ENSMUSG00000002608.2	protein_coding	Ccdc97	8.52	6.3	7.46	6.8	8.29	8.97	8.28	9.2	9.7
ENSMUSG00000002617.8	protein_coding	Zfp40	2.72	1.13	2.53	3.3	2.71	2.59	2.47	2.58	3.07
ENSMUSG00000002625.8	protein_coding	Akap8l	11.15	9.29	11.62	11.33	12.14	13.27	9.92	9.96	14.99
ENSMUSG00000002633.3	protein_coding	Shh	0	0	0	0	0	0	0	0	0
ENSMUSG00000002635.5	protein_coding	Pdcd2l	8.36	10.14	9.83	9.88	10.16	12.48	8.99	11.33	13.59
ENSMUSG00000002658.8	protein_coding	Gtf2f1	41.19	37.66	40.85	52.05	59.83	51.82	61.05	64.14	58.2
ENSMUSG00000002660.7	protein_coding	Clpp	25.42	25.89	27.07	32.98	34.58	37.14	35.11	37.6	42.32
ENSMUSG00000002661.8	protein_coding	Alkbh7	7.41	4.66	7.67	10.3	9.41	12.5	12.91	10.65	14.96
ENSMUSG00000002664.2	protein_coding	Pspn	0.34	0.22	0.64	0.4	0.82	0.68	0.19	0.66	1.35
ENSMUSG00000002668.7	protein_coding	Dennd1c	0	0.01	0	0	0	0	0	0	0
ENSMUSG00000002679.8	protein_coding	Med6	21.28	25.2	22.03	20.69	24.33	21.63	21.39	24.76	22.83
ENSMUSG00000002688.7	protein_coding	Prkd1	10.88	6.34	11.4	10.37	11.73	13.29	15.78	17.44	11.87
ENSMUSG00000002699.5	protein_coding	Lcp2	0	0.02	0	0	0	0	0	0	0
ENSMUSG00000002718.8	protein_coding	Cse1l	41.58	40.98	39.22	40.48	45.2	40.52	47.22	53.9	44.16
ENSMUSG00000002728.8	protein_coding	Naa20	40.71	40.38	44.17	37.51	42.21	35.15	38.25	44.29	38.69
ENSMUSG00000002731.6	protein_coding	Prkra	11.14	7.34	10.94	13.31	8.27	13.89	12.5	9.56	13.93
ENSMUSG00000002732.7	protein_coding	Fkbp7	26.63	16.7	26.35	31.33	20.89	28.9	24.47	20.58	28.87
ENSMUSG00000002733.8	protein_coding	Plekha3	22.34	28.14	23.89	19.65	27.69	23.27	21.9	28.81	23
ENSMUSG00000002741.9	protein_coding	Ykt6	31.11	31.4	36.3	36.78	39.96	40.06	40.96	42.03	44.17
ENSMUSG00000002748.5	protein_coding	Baz1b	69.41	63.33	70.33	52.64	66.23	59.84	58.4	66.77	59.71
ENSMUSG00000002763.10	protein_coding	Pex6	6.4	4.67	7.28	7.04	6.37	7.62	7.01	5.91	7.2
ENSMUSG00000002767.7	protein_coding	Mrpl2	30.04	29.4	29.81	39.01	41.45	41.47	42.56	42.35	45.32
ENSMUSG00000002768.7	protein_coding	Mea1	50.68	43.57	57.59	74.7	75.08	79.8	76.12	74.19	82.79
ENSMUSG00000002769.8	protein_coding	Gnmt	0.06	0.2	0.18	0.11	0.15	0.03	0.04	0.11	0.11
ENSMUSG00000002771.9	protein_coding	Grin2d	0.56	0.5	0.5	0.33	0.5	0.49	0.44	0.37	0.45
ENSMUSG00000002778.6	protein_coding	Kdelr1	46.71	46.34	48.87	49.17	45.34	51.17	45.87	45.3	56.27
ENSMUSG00000002781.9	protein_coding	Tmem143	3.69	3.31	4.57	4.3	4.97	6.02	4.76	3.84	6.76
ENSMUSG00000002791.9	processed_transcript	Pdxk-ps	0.07	0.17	0.15	0.1	0.11	0.2	0.12	0.21	0.21
ENSMUSG00000002797.7	protein_coding	Ggct	6.54	6.55	10.99	6.38	8.74	8.34	8.65	10.78	9.17
ENSMUSG00000002799.5	protein_coding	Jag2	0.08	0.1	0.13	0.08	0.11	0.09	0.06	0.09	0.09
ENSMUSG00000002803.7	protein_coding	Btbd6	3.15	2.18	3.24	2.7	2.42	2.94	3.06	2.82	2.73
ENSMUSG00000002804.3	protein_coding	Nudt14	9.55	7.19	11.23	9.3	9.11	13.02	9.76	9.49	13.72
ENSMUSG00000002808.6	protein_coding	Epdr1	24.96	15.25	19.66	29.1	18.21	20.12	24.59	16.92	18.17
ENSMUSG00000002812.4	protein_coding	Flii	33.48	22.12	32.48	36.22	32.76	38.3	39.09	36.33	41.06
ENSMUSG00000002814.8	protein_coding	Top3a	7.9	6.96	7.69	9.84	9.72	9.98	9.55	9.48	10.28
ENSMUSG00000002820.5	protein_coding	Atg4d	7.48	6.68	7.62	8.14	7.63	7.95	9.62	9.28	9.94
ENSMUSG00000002825.6	protein_coding	Qtrt1	8.32	11.3	6.76	8.35	10.95	8.29	11.62	10.01	11.21
ENSMUSG00000002831.7	protein_coding	Plin4	4.53	0.81	2.52	4.19	2.22	4.02	2.79	0.96	2.33
ENSMUSG00000002833.9	protein_coding	Hdgfrp2	33.83	24.45	34.71	40.79	40.12	44.21	43	38.08	44.52
ENSMUSG00000002835.7	protein_coding	Chaf1a	24.96	22.1	24.53	27.21	33.14	28.8	30.72	31.19	28.72
ENSMUSG00000002844.8	protein_coding	Adprh	29.19	28.82	32.94	28.18	29.41	32.77	27.23	28.18	33.11
ENSMUSG00000002845.8	protein_coding	Tmem39a	32.27	64.71	42.05	30.5	48.78	37.54	31.93	40.57	41.79
ENSMUSG00000002846.9	protein_coding	4930455C21Rik	10.55	12.08	12.53	10.08	11.48	13.94	12.98	12.26	13.89
ENSMUSG00000002847.6	protein_coding	Pla1a	4.76	4.34	1.08	1.03	2.95	0.35	1.55	2.13	0.38
ENSMUSG00000002870.7	protein_coding	Mcm2	96.68	90.62	99.7	88.5	103.17	92.54	93.96	90.89	91.3
ENSMUSG00000002871.8	protein_coding	Tpra1	22.33	17.23	23.31	20.77	22.49	21.69	19.22	18.32	21.2
ENSMUSG00000002881.8	protein_coding	Nab1	23.07	34.51	30.65	18.69	31.93	23.37	22.93	35.66	25.66
ENSMUSG00000002885.8	protein_coding	Cd97	12.79	8.75	15.88	15.03	14.6	15.93	14.21	12.35	13.83
ENSMUSG00000002897.3	protein_coding	Il17ra	11.17	9.05	11.25	8.42	10.21	8.59	9.59	9.64	8.83
ENSMUSG00000002900.8	protein_coding	Lamb1	57.32	66.53	57.23	38.89	57.13	55.22	50.83	69.09	66.49
ENSMUSG00000002908.8	protein_coding	Kcnn1	0.38	0.24	0.38	0.44	0.47	0.88	0.57	0.34	1.01
ENSMUSG00000002910.9	protein_coding	Arrdc2	5.28	4.07	4.42	4.04	4.57	4.28	3.53	4.15	4.88
ENSMUSG00000002930.5	protein_coding	Gsbs	0	0	0	0	0	0	0	0	0
ENSMUSG00000002944.8	protein_coding	Cd36	0	0	0.01	0	0	0	0	0.01	0.01
ENSMUSG00000002948.11	protein_coding	Map2k7	25.74	20.31	24.27	19.68	21.53	24.14	22	20.91	25.42
ENSMUSG00000002949.8	protein_coding	Timm44	27.84	29.68	30.34	25.94	28.48	26.4	26.2	28.17	30.58
ENSMUSG00000002957.8	protein_coding	Ap2a2	35.92	24.84	31.95	38.3	32.89	37.72	45.07	42.04	45.97
ENSMUSG00000002963.9	protein_coding	Pnkp	12.9	13.06	13.76	11.41	15.13	14.82	12.93	14.26	19.47
ENSMUSG00000002968.6	protein_coding	Med25	15.97	13.76	15.8	15.27	16.15	18.51	17.38	17.68	21.32
ENSMUSG00000002980.8	protein_coding	Bcam	2.54	1.44	3.97	3.07	2.41	3.62	2.55	2.61	3.65
ENSMUSG00000002981.9	protein_coding	Clptm1	28.47	29.19	29.45	30.05	36.12	33.84	33.31	35.26	34.46
ENSMUSG00000002983.9	protein_coding	Relb	19.9	31.92	27.92	17.92	27.42	27.3	20.43	26.16	33.84
ENSMUSG00000002984.10	protein_coding	Tomm40	24.98	29.13	22.26	26.54	28.7	27.22	33.58	30.5	36.11
ENSMUSG00000002985.9	protein_coding	Apoe	70.12	9.03	121.73	101.8	48.43	192.48	60.4	28.27	226.72
ENSMUSG00000002992.10	protein_coding	Apoc2	0	0	0	0	0	0	0	0	0
ENSMUSG00000002996.9	protein_coding	Hbp1	33.16	32.66	38.94	27.54	27.38	34.33	29.69	31.59	35.32
ENSMUSG00000002997.9	protein_coding	Prkar2b	32.95	16.59	30.97	31.17	22.67	28.65	36.47	23.16	24.68
ENSMUSG00000003031.8	protein_coding	Cdkn1b	36.77	16.94	36.81	32.86	21.16	35.53	30.8	24.92	34.17
ENSMUSG00000003032.7	protein_coding	Klf4	7.38	3.98	5.98	8.77	7.68	8.79	7.34	3.21	9.41
ENSMUSG00000003033.8	protein_coding	Ap1m1	33.2	22.91	29.19	27.76	25.97	26.7	26.65	23.94	28.58
ENSMUSG00000003037.9	protein_coding	Rab8a	40.45	29.1	40.05	32.86	29.65	34.67	33.61	29.18	38.79
ENSMUSG00000003038.9	protein_coding	Hmgn2	308.67	222.29	329.99	294.9	228.37	250.27	252.75	237.36	283.72
ENSMUSG00000003039.8	protein_coding	Fam32a	37.55	32.72	41.14	34.56	32.29	40.04	32.98	33.53	41.32
ENSMUSG00000003051.7	protein_coding	Elf3	0.01	0.04	0.11	0	0	0.03	0	0.01	0.02
ENSMUSG00000003053.9	protein_coding	Cyp2c29	0	0	0	0	0	0	0	0	0
ENSMUSG00000003062.8	protein_coding	Stard3nl	18.63	25.85	18.67	18.22	22.82	17.07	19.95	22.93	18.61
ENSMUSG00000003068.8	protein_coding	Stk11	35.67	30.97	36.11	29.69	32.26	34.54	34.3	36.65	35.89
ENSMUSG00000003070.6	protein_coding	Efna2	1.28	0.68	1.37	1.26	0.87	2.18	0.99	0.87	1.47
ENSMUSG00000003072.9	protein_coding	Atp5d	97.87	80.88	104.63	124.21	103.09	138.85	143.18	127.32	169.34
ENSMUSG00000003099.5	protein_coding	Ppp5c	17.27	19.66	19.44	20.42	19.2	21.08	21.65	20.4	23.39
ENSMUSG00000003119.7	protein_coding	Cdk12	14.83	14.64	14.07	13.44	18.6	16.32	16.57	19.46	17.95
ENSMUSG00000003123.9	protein_coding	Lipe	5.35	6.48	7.78	4.57	5.95	7.67	5.47	5.12	6.77
ENSMUSG00000003131.5	protein_coding	Pafah1b2	44.74	50	48.33	44.94	49.24	49.72	48.83	54.47	53.88
ENSMUSG00000003134.5	protein_coding	Tbc1d8	1.84	1.03	1.65	1.38	1.13	1.22	1.24	0.97	1.22
ENSMUSG00000003135.9	protein_coding	D1Bwg0212e	15.21	16.35	14.85	12.36	13.23	12.48	14.27	14.57	13.22
ENSMUSG00000003153.4	protein_coding	Slc2a3	2.02	2.03	1.66	0.87	1.32	1.05	0.8	1.79	0.92
ENSMUSG00000003154.8	protein_coding	Foxj2	6.36	3.84	5.83	4.49	4.28	5.14	4.69	4.48	5.38
ENSMUSG00000003161.9	protein_coding	Sri	57.29	34.47	65.37	60.64	47.73	57.05	58.07	48.31	71.28
ENSMUSG00000003166.12	protein_coding	Dgcr2	33.16	27.06	33.01	27.19	26.63	29.88	28	28.06	31.13
ENSMUSG00000003178.6	protein_coding	Mical3	4.96	3.49	4.65	3.51	3.5	4.24	4.34	4.39	4.85
ENSMUSG00000003184.8	protein_coding	Irf3	25.44	23.03	29.77	26.86	30.35	30.09	24.91	26.77	34.22
ENSMUSG00000003190.5	protein_coding	Bcl2l12	9.67	6.68	10.57	12.42	9.51	10.95	10.18	9.28	12.25
ENSMUSG00000003198.8	protein_coding	Zfp959	4.21	3.3	4.4	5.14	5.33	4.8	5.16	5.8	5.41
ENSMUSG00000003199.10	protein_coding	Mpnd	40.48	31.78	47.67	55.89	50.07	56.62	50.69	50.09	58.88
ENSMUSG00000003200.8	protein_coding	Sh3gl1	36.2	32.03	38.77	45.67	44.29	46.53	47.51	45.4	49.41
ENSMUSG00000003206.6	protein_coding	Ebi3	0	0	0	0.02	0.02	0.05	0	0.05	0
ENSMUSG00000003208.8	protein_coding	Ccdc94	7.79	6.86	8.03	9.54	9.39	10.14	10.43	9.56	9.84
ENSMUSG00000003226.6	protein_coding	Ranbp2	36.31	36.96	39.36	31.53	42.92	38.33	38.28	45.86	41.17
ENSMUSG00000003227.4	protein_coding	Edar	0.03	0.01	0.04	0.01	0.03	0.04	0.03	0.02	0.07
ENSMUSG00000003228.8	protein_coding	Grk5	4.84	3.7	5.78	3.88	3.85	4.12	3.91	4.52	4.36
ENSMUSG00000003233.5	protein_coding	Dvl3	4.72	2.97	4.39	2.59	3.05	3.23	2.86	3.42	3.71
ENSMUSG00000003234.9	protein_coding	Abcf3	24.17	21.27	22.91	20.35	23.32	21.12	21	19.95	26.86
ENSMUSG00000003235.6	protein_coding	Eif2b5	13.89	15.71	12.91	12.67	11.16	12.46	13.99	12.45	15.15
ENSMUSG00000003269.8	protein_coding	Cyth2	26.18	25.46	27.06	28.17	27.4	29.07	24.23	26.01	30.41
ENSMUSG00000003271.9	protein_coding	Sult2b1	0.26	0.37	0.31	0.15	0.18	0.14	0.24	0.36	0.24
ENSMUSG00000003273.7	protein_coding	Car11	1.43	1.08	1.85	1.15	1.37	1.55	1.08	0.8	2.41
ENSMUSG00000003279.9	protein_coding	Dlgap1	0.09	0.12	0.01	0.01	0.05	0.03	0.08	0.1	0.02
ENSMUSG00000003282.3	protein_coding	Plag1	4.18	4.38	4.23	3.44	6.1	6.5	4.83	6.6	6.85
ENSMUSG00000003283.7	protein_coding	Hck	0.17	0.27	0.15	0.17	0.25	0.21	0.26	0.24	0.34
ENSMUSG00000003299.9	protein_coding	Mrpl4	19.34	15.33	22.26	21.13	18.73	22.78	22.72	19.21	23.15
ENSMUSG00000003308.8	protein_coding	Keap1	20.16	17.03	21.57	17.5	17.82	20.16	18.75	18.28	19.29
ENSMUSG00000003309.7	protein_coding	Ap1m2	0	0.01	0	0	0	0	0	0	0
ENSMUSG00000003316.8	protein_coding	Glg1	44.63	39.8	41.99	29.37	38.81	37	36.34	44.34	35.31
ENSMUSG00000003341.7	protein_coding	Atp8b3	0.41	0.06	0.72	0.44	0.3	0.58	0.25	0.31	0.97
ENSMUSG00000003344.8	protein_coding	Btbd2	19.62	8.35	17.69	20.6	15.34	25.92	16.5	15.21	23.98
ENSMUSG00000003345.8	protein_coding	Csnk1g2	51.37	46.72	58.57	50.02	51.23	60.38	54.86	57.31	60.84
ENSMUSG00000003346.7	protein_coding	Fam108a	32.34	27.17	34.37	34.83	33.45	43.19	39.74	37.76	45.5
ENSMUSG00000003348.9	protein_coding	Mob3a	18.98	14.5	16.89	20.59	19.21	22.07	22.7	20.25	21.15
ENSMUSG00000003352.7	protein_coding	Cacnb3	47.19	28.08	46	41.25	35.22	50.45	40.25	38.03	40.87
ENSMUSG00000003354.4	protein_coding	Ccdc65	0.76	0.32	0.89	0.61	0.56	0.99	0.96	0.8	1.08
ENSMUSG00000003355.6	protein_coding	Fkbp11	16.47	29.12	16.62	17.64	21.84	18.63	16.67	20.15	19.2
ENSMUSG00000003360.8	protein_coding	Ddx23	32.9	29.85	32.37	34.45	36.83	31.83	35.44	34.03	37.34
ENSMUSG00000003363.9	protein_coding	Pld3	63.17	30.11	77.05	69.94	58.46	93.78	64.67	52.15	89.16
ENSMUSG00000003378.8	protein_coding	Grik5	1.27	0.87	1.32	1.47	1.79	1.99	1.26	2.08	2.27
ENSMUSG00000003379.7	protein_coding	Cd79a	0.08	0.05	0.11	0.06	0.05	0.02	0.07	0.02	0.03
ENSMUSG00000003380.9	protein_coding	Rabac1	44.12	42.17	47.18	49.1	40.83	50.38	41.04	41.48	44.88
ENSMUSG00000003382.11	protein_coding	Etv3	7.26	6.54	7.09	6.16	6.99	7.73	7.04	7.34	7.57
ENSMUSG00000003402.7	protein_coding	Prkcsh	66.25	62.86	70.91	64.91	67.71	72.48	65.05	64.66	68.54
ENSMUSG00000003410.7	protein_coding	Elavl3	0.02	0.04	0.03	0.03	0.03	0.01	0.04	0.04	0.01
ENSMUSG00000003411.4	protein_coding	Rab3b	6.84	2.01	5.4	5.25	3	6.34	4.52	4.05	5
ENSMUSG00000003418.9	protein_coding	St8sia6	0.04	0.01	0.02	0.04	0.02	0.02	0.04	0.01	0.01
ENSMUSG00000003420.7	protein_coding	Fcgrt	74.94	33.2	91.93	67.24	46.93	85.99	57.56	42.01	73.5
ENSMUSG00000003421.6	protein_coding	Nosip	25.56	20.79	24.04	20.73	22.29	22.32	26.36	26.44	25.63
ENSMUSG00000003423.8	protein_coding	Pih1d1	47.67	40.91	48.77	49.21	51.87	46.02	49.79	48.82	48.71
ENSMUSG00000003429.9	protein_coding	Rps11	429.95	568.93	386.26	614.38	531.27	509.72	640.56	604.44	690.51
ENSMUSG00000003435.8	protein_coding	Supt5h	40.65	36.71	42.17	41.25	47.04	49.94	46.68	43.87	50.57
ENSMUSG00000003436.10	protein_coding	Dll3	0.01	0.01	0.07	0.04	0.01	0.01	0.04	0.1	0.06
ENSMUSG00000003437.8	protein_coding	Paf1	27.2	19.15	33.06	28.76	27.72	32.98	32.56	29.58	35.86
ENSMUSG00000003438.10	protein_coding	Timm50	26.15	25.33	26.76	33.39	32.21	34.12	33.74	31.3	35.27
ENSMUSG00000003444.8	protein_coding	Med29	12.34	10.41	13.07	14.11	13.25	17.21	15.9	15.31	18.56
ENSMUSG00000003452.9	protein_coding	Bicd1	2.31	2.02	3.74	2.43	4.51	6.6	3.04	2.9	6.83
ENSMUSG00000003458.6	protein_coding	Ncstn	48.85	39.2	50.93	40.97	46.52	45.81	43.18	47.94	48.85
ENSMUSG00000003464.7	protein_coding	Pex19	40.71	32.25	44.89	41.06	33.39	43.67	41.22	40.87	47.13
ENSMUSG00000003469.3	protein_coding	Phyhip	0.4	0.1	0.45	0.27	0.09	0.11	0.19	0.26	0.18
ENSMUSG00000003476.8	protein_coding	Crhr2	0.03	0.02	0.01	0	0.02	0	0.01	0	0
ENSMUSG00000003477.5	protein_coding	Inmt	0.97	0	6.51	0.05	0.1	2.41	0.32	0.03	1.36
ENSMUSG00000003484.4	protein_coding	Cyp4f18	0	0	0.07	0	0	0.02	0	0.07	0
ENSMUSG00000003500.7	protein_coding	Impdh1	7.67	11.36	7.34	7.16	8.63	6.82	8.68	8.99	9.55
ENSMUSG00000003505.8	protein_coding	Psg18	0	0	0	0	0	0	0	0	0
ENSMUSG00000003518.6	protein_coding	Dusp3	15.3	8.59	14.48	16.18	14.28	16.38	17.47	11.45	20.05
ENSMUSG00000003526.5	protein_coding	Prodh	1.23	0.71	0.91	0.73	0.56	0.31	0.95	0.43	0.84
ENSMUSG00000003527.8	protein_coding	Dgcr14	9.39	6.86	9.54	7.95	6.6	8.09	7.68	7.35	8.18
ENSMUSG00000003528.8	protein_coding	Slc25a1	32.03	44.23	35.17	29.1	35.61	29.46	27.83	35.76	31.72
ENSMUSG00000003531.8	protein_coding	Dgcr6	16.78	14.56	17.23	16.01	12.82	16.36	16.8	14.64	17.26
ENSMUSG00000003534.10	protein_coding	Ddr1	20.2	10.28	20.05	22.31	16.33	26.34	24.69	17.1	33.31
ENSMUSG00000003541.6	protein_coding	Ier3	92.84	171.55	101.2	85.85	107.22	68.57	105.74	122.34	59.1
ENSMUSG00000003545.2	protein_coding	Fosb	0.13	0.24	0.23	0.14	0.23	0.32	0.14	0.31	0.25
ENSMUSG00000003546.8	protein_coding	Klc4	6.2	3.95	7.15	7.22	6.21	10.18	7.62	6.71	9.4
ENSMUSG00000003549.2	protein_coding	Ercc1	15.42	14.61	15.75	16.44	13.88	17.73	14.37	14.84	20.65
ENSMUSG00000003555.7	protein_coding	Cyp17a1	0	0.01	0.01	0	0	0	0	0.03	0
ENSMUSG00000003559.7	protein_coding	As3mt	0.35	0.79	0.62	0.33	0.48	0.34	0.35	0.53	0.37
ENSMUSG00000003573.9	protein_coding	Homer3	48.87	30.19	50.26	44.06	41.08	55.9	44.11	39.28	59.78
ENSMUSG00000003575.7	protein_coding	Crtc1	7.17	3.58	6.07	4.07	4.12	5.39	4.99	4.53	5.91
ENSMUSG00000003581.8	protein_coding	Rnf215	9.22	8.05	12.28	10.89	10.45	13.4	10.27	10.91	14.8
ENSMUSG00000003585.7	protein_coding	Sec14l2	1.02	0.84	1.1	0.91	0.99	1.01	0.71	0.89	0.7
ENSMUSG00000003604.7	protein_coding	Aven	9.21	8.68	8.29	8.89	10.03	8.79	10.95	11.01	10.11
ENSMUSG00000003617.10	protein_coding	Cp	47.04	89.98	77.32	43.97	129.35	78.14	59.43	148.89	174.11
ENSMUSG00000003623.4	protein_coding	Crot	14.27	9.41	12.71	13.72	10.97	13.67	13.31	12.74	13.35
ENSMUSG00000003644.11	protein_coding	Rps6ka1	6.07	6.07	5.79	5.62	6.24	8.51	6.11	7.63	7.83
ENSMUSG00000003657.7	protein_coding	Calb2	0	0	0	0	0	0	0	0	0
ENSMUSG00000003660.9	protein_coding	Snrnp200	41.04	30.79	39.11	33.47	38.89	36.58	40.59	40.63	41.2
ENSMUSG00000003662.4	protein_coding	Ciao1	37.74	28.55	38.31	36.09	37.54	38.62	37.72	39.02	41.04
ENSMUSG00000003665.6	protein_coding	Has1	2.23	8.67	3.47	0.98	3.36	1.52	2.51	4.91	1.59
ENSMUSG00000003680.7	protein_coding	Taf6l	20.32	16.22	20.89	18.98	20.01	22.29	18.74	18.75	21.06
ENSMUSG00000003721.8	protein_coding	Insig2	19.84	11.05	37.34	15.6	15.16	36.99	18.64	19.33	53.09
ENSMUSG00000003731.7	protein_coding	Kpna6	23.79	21.36	23.92	23.42	24.59	25.98	29.31	25.95	31.83
ENSMUSG00000003746.9	protein_coding	Man1a	11.15	8.27	14.37	9.59	9.07	13.97	12.64	12.97	20.04
ENSMUSG00000003752.8	protein_coding	Itpkc	3.78	3.88	3.74	3.94	3.67	3.89	4.05	3.72	4.32
ENSMUSG00000003762.7	protein_coding	Adck4	5.89	6.42	5.66	3.96	5.62	4.51	4.16	6.21	5.45
ENSMUSG00000003778.8	protein_coding	Brd8	31.96	24.16	38.15	32.23	32.56	36.04	32.43	33.12	37.14
ENSMUSG00000003779.8	protein_coding	Kif20a	53.13	40.27	65.34	53.83	47.31	56.06	59.68	63.18	69.01
ENSMUSG00000003808.11	protein_coding	Farsa	31.51	38.17	32.06	32.04	33.53	32.63	38.15	35.46	38.16
ENSMUSG00000003809.7	protein_coding	Gcdh	18.21	9.46	16.82	13.89	12.82	18.68	14.3	14.15	20.76
ENSMUSG00000003810.6	protein_coding	Mast2	27.22	22.73	26.18	21.33	27.86	27.91	25.24	27.88	31.01
ENSMUSG00000003812.7	protein_coding	Dnase2a	45.8	22.97	45.48	39.92	32.02	38.8	34.41	26.18	35.27
ENSMUSG00000003813.8	protein_coding	Rad23a	42.21	45.09	47.82	31.16	42.53	36.38	34.47	40.16	42.74
ENSMUSG00000003814.8	protein_coding	Calr	492.19	560.7	600.48	503.1	435.03	577.78	542.56	588.52	645.9
ENSMUSG00000003824.6	protein_coding	Syce2	33.03	37.19	33.14	25.87	27.81	27.37	17.31	23.11	24.44
ENSMUSG00000003847.9	protein_coding	Nfat5	24.48	15.48	23.21	13.07	19.12	22.22	14.37	21.6	20.05
ENSMUSG00000003848.8	protein_coding	Nob1	16.79	18.77	13.62	17.75	17.54	17.26	19.47	15.52	18.28
ENSMUSG00000003849.8	protein_coding	Nqo1	18.74	12.76	25.04	28.56	13.77	19.29	23.48	10.76	15.71
ENSMUSG00000003863.9	protein_coding	Ppfia3	0.92	0.86	1.02	1.26	1.02	2.26	0.96	0.95	1.98
ENSMUSG00000003865.8	protein_coding	Gys1	8.74	15.73	7.28	7.47	12.09	7.84	9.89	16	8.68
ENSMUSG00000003868.6	protein_coding	Ruvbl2	26.51	41.89	25.27	33.8	38.83	33.34	38.46	43.31	42.13
ENSMUSG00000003872.7	protein_coding	Lin7b	1.03	1.11	0.85	0.79	1.28	1.45	0.86	0.88	2.24
ENSMUSG00000003873.9	protein_coding	Bax	61.74	54.6	69.26	81.16	71.23	85.95	74.92	63.04	98.99
ENSMUSG00000003882.4	protein_coding	Il7r	0	0.01	0	0	0.01	0	0	0.01	0
ENSMUSG00000003923.8	protein_coding	Tfam	27.73	35.07	23.21	26.92	38.28	27.96	23.98	36.34	29.73
ENSMUSG00000003929.9	protein_coding	Zfp81	4.05	3.42	4.62	3.87	4	5.53	4.63	4.39	4.57
ENSMUSG00000003934.5	protein_coding	Efnb3	0.56	0.42	0.57	0.57	0.72	0.38	0.55	0.57	0.54
ENSMUSG00000003948.9	protein_coding	Mmd	22.21	18.07	64.81	31.74	32.9	69.14	37.92	39.9	53.3
ENSMUSG00000003949.8	protein_coding	Hlf	4.91	0.9	7.92	2.21	3.06	4.82	4.5	7.1	4.66
ENSMUSG00000003955.7	protein_coding	Fam162a	30.05	159.68	30.36	26.73	47.62	26.7	29.99	97.86	28.21
ENSMUSG00000003970.8	protein_coding	Rpl8	801.88	973.32	753.34	1085.13	998.41	986.02	1198.44	1166.29	1129.34
ENSMUSG00000003974.4	protein_coding	Grm3	0	0	0.01	0	0	0.01	0	0	0.06
ENSMUSG00000003992.8	protein_coding	Ssbp2	35.41	16.7	36.82	35.72	23.77	32.32	30.12	22.31	44.15
ENSMUSG00000004018.3	protein_coding	Fancl	5.03	4.16	5.98	6.62	5.16	5.48	5.53	5.8	7.41
ENSMUSG00000004031.8	protein_coding	Fam5b	0	0.01	0	0	0	0	0	0	0
ENSMUSG00000004032.4	protein_coding	Gstm5	34.48	28.84	48.09	47.35	37.93	62.85	47.66	47.06	72.54
ENSMUSG00000004035.6	protein_coding	Gstm7	4.83	1.1	5.91	6	2.27	5.83	5.65	3.39	7.15
ENSMUSG00000004038.7	protein_coding	Gstm3	0	0.02	0.02	0	0	0	0	0.03	0
ENSMUSG00000004040.10	protein_coding	Stat3	77.01	70.6	67.5	66.5	81.91	60.14	78.95	98.18	68.56
ENSMUSG00000004043.8	protein_coding	Stat5a	11.45	17.84	12.74	11.45	16.44	10.62	12.39	19.2	13.39
ENSMUSG00000004044.8	protein_coding	Ptrf	61.17	31.69	49.05	69.01	52.11	71.35	90.34	59.58	76.79
ENSMUSG00000004054.8	protein_coding	Map3k11	12.36	8.85	12.83	11.05	11.61	14.03	12.47	12.21	16.19
ENSMUSG00000004056.8	protein_coding	Akt2	40.89	31.73	42.36	38.4	38.31	44.94	39.83	38.81	47.3
ENSMUSG00000004069.9	protein_coding	Dnaja3	19.1	26.65	19.27	16.62	21.16	17.86	18.52	18.94	19.31
ENSMUSG00000004070.9	protein_coding	Hmox2	31.79	25.16	33.4	32.23	26.47	33.97	28.18	30.57	32.83
ENSMUSG00000004071.6	protein_coding	5730403B10Rik	22.22	18.01	23.03	16.83	17.61	20.6	15.92	17.59	23.18
ENSMUSG00000004085.8	protein_coding	B230120H23Rik	13.11	13.27	14.68	15.45	14.64	16.33	14.51	14.73	18.04
ENSMUSG00000004096.8	protein_coding	Cwc15	56.6	59.46	62.78	57.31	57	58.74	60.58	62.79	60.75
ENSMUSG00000004098.7	protein_coding	Col5a3	1.26	3.18	1.64	1.27	1.93	1.59	1.47	2.75	2.27
ENSMUSG00000004099.8	protein_coding	Dnmt1	91.15	70.76	88.28	81.15	87.1	81.44	90.86	85.14	84.58
ENSMUSG00000004100.5	protein_coding	Ppan	25.25	39.79	21.86	25.92	33.03	21.44	27.56	31.06	29.09
ENSMUSG00000004105.6	protein_coding	Angptl2	42.14	33.48	28.7	35.01	29.1	21.38	31.62	28.49	20.93
ENSMUSG00000004110.7	protein_coding	Cacna1e	0	0	0	0	0	0	0	0	0
ENSMUSG00000004113.11	protein_coding	Cacna1b	0.07	0.13	0.03	0.17	0.06	0.04	0.08	0.01	0.02
ENSMUSG00000004127.6	protein_coding	Rg9mtd2	5.41	5.8	5.69	5.61	6.35	7.01	8.26	7.31	7.81
ENSMUSG00000004151.8	protein_coding	Etv1	10.52	28.28	8.78	6.01	14.96	8.03	11.04	19.45	5.84
ENSMUSG00000004187.9	protein_coding	Kifc2	1.17	0.55	1.53	1.04	1.01	2	0.79	0.97	1.96
ENSMUSG00000004207.7	protein_coding	Psap	779.95	561.67	642.86	717.65	668.89	632.26	644.27	593.58	594.65
ENSMUSG00000004221.9	protein_coding	Ikbkg	24.24	19.05	23.01	19.13	22.9	22.42	21.77	21.3	21.54
ENSMUSG00000004231.7	protein_coding	Pax2	0.01	0	0	0	0.01	0.01	0	0	0
ENSMUSG00000004233.8	protein_coding	Wars2	2.43	2.1	3.08	2.9	2.96	4.15	3.45	3.19	4.17
ENSMUSG00000004263.9	protein_coding	Atn1	9.56	5.4	5.97	3.98	5.72	5.57	5.27	9.55	7.57
ENSMUSG00000004264.10	protein_coding	Phb2	91.42	95.55	87.02	101.73	106.21	100.2	116.12	125.16	131.42
ENSMUSG00000004266.9	protein_coding	Ptpn6	0.72	0.98	1.13	0.39	0.96	0.55	0.4	0.93	0.93
ENSMUSG00000004267.10	protein_coding	Eno2	32.33	20.05	28.94	20.77	26.17	25.47	14.81	15.6	27.67
ENSMUSG00000004268.5	protein_coding	Emg1	60.53	65.78	62.1	70.38	71.71	69.57	75.3	87.09	78.26
ENSMUSG00000004270.7	protein_coding	Lpcat3	21.98	27.53	24.17	20.35	31.95	26.18	24.11	35.13	30.75
ENSMUSG00000004285.6	protein_coding	Atp6v1f	138.64	115.94	148.02	132.31	152.9	149.67	122.95	131.14	139.88
ENSMUSG00000004296.8	protein_coding	Il12b	0	0.03	0.01	0	0	0.01	0	0	0
ENSMUSG00000004317.8	protein_coding	Clcn5	17.09	13.4	12.84	11.34	16.39	13.39	14.95	16.51	18.67
ENSMUSG00000004319.9	protein_coding	Clcn3	5.87	9.37	6.46	4.8	7.77	6.07	6.19	7.07	6.96
ENSMUSG00000004328.8	protein_coding	Hif3a	0	0	0	0	0.02	0.01	0.02	0.01	0.03
ENSMUSG00000004341.7	protein_coding	Gpx6	0	0	0	0	0	0	0	0	0
ENSMUSG00000004344.5	protein_coding	Gpx5	0	0	0	0	0	0	0	0	0
ENSMUSG00000004347.9	protein_coding	Pde1c	0.06	0.02	0.09	0.16	0.04	0.04	0.19	0.03	0.05
ENSMUSG00000004356.7	protein_coding	Utp20	11.65	13.21	9.53	11.52	14.17	12.56	15.6	15.33	16.19
ENSMUSG00000004359.9	protein_coding	Spic	0	0.02	0	0	0.02	0	0	0	0
ENSMUSG00000004360.8	protein_coding	9330159F19Rik	0	0	0	0.01	0.02	0.02	0	0.01	0.04
ENSMUSG00000004364.8	protein_coding	Cul3	50.43	51.01	53.79	41	49.22	43.81	50.53	63	50.29
ENSMUSG00000004366.3	protein_coding	Sst	0	0.05	0.06	0	0.05	0	0	0	0
ENSMUSG00000004371.7	protein_coding	Il11	0.11	7.66	1.71	0.3	1.17	0.63	0.41	2.75	0.62
ENSMUSG00000004383.10	protein_coding	Large	17.03	12.23	16.42	13.27	13.31	15.13	15.92	14.34	17.62
ENSMUSG00000004393.4	protein_coding	Ddx56	24.14	25.54	23.01	33.26	36.75	32.1	36.48	36.61	41.48
ENSMUSG00000004394.6	protein_coding	Tmed4	31.22	27.07	38.19	40.13	40.37	50.43	42.9	44.41	51.24
ENSMUSG00000004415.8	protein_coding	Emid2	0	0.01	0	0	0.01	0	0	0	0
ENSMUSG00000004446.6	protein_coding	Bid	20	13.38	18.47	18.5	16.54	12.69	16.8	12.14	15.22
ENSMUSG00000004451.8	protein_coding	Ralb	25.99	18.15	25.28	24.46	22.52	26.32	24.47	21.72	28.7
ENSMUSG00000004455.10	protein_coding	Ppp1cc	139.49	142.05	159.28	133.41	146.51	156.01	145.06	163.54	183.97
ENSMUSG00000004460.9	protein_coding	Dnajb11	44.75	54.16	51.19	36.15	42.35	43.15	39.28	47.08	45.76
ENSMUSG00000004462.6	protein_coding	Tbccd1	8.21	5.42	8.56	6.37	5.61	7.5	6.34	5.27	8.33
ENSMUSG00000004473.9	protein_coding	Clec11a	0.88	0.73	1.25	0.78	0.48	0.62	0.49	0.49	0.87
ENSMUSG00000004500.8	protein_coding	Zfp324	4.7	2.44	5.23	4.57	3.15	5.88	4.64	3.59	6.18
ENSMUSG00000004508.5	protein_coding	Gab2	5.59	5.38	4.96	4.96	6.02	5.56	5.18	5.42	4.87
ENSMUSG00000004530.6	protein_coding	Coro1c	40.89	29.07	43.41	42.9	39.53	44.44	46.84	40.92	57.2
ENSMUSG00000004535.6	protein_coding	Tax1bp1	52.58	54.88	58.53	46.1	53.21	52.44	47.59	55.59	53.15
ENSMUSG00000004540.7	protein_coding	Psg17	0.01	0.02	0.03	0	0.02	0.04	0	0.05	0.07
ENSMUSG00000004542.7	protein_coding	Psg19	0	0	0	0	0	0	0	0.01	0
ENSMUSG00000004552.10	protein_coding	Ctse	0	0	0	0	0	0	0	0	0.02
ENSMUSG00000004558.8	protein_coding	Ndrg2	10.45	17.67	11.62	4.54	6.49	10.05	5.35	10.24	7.67
ENSMUSG00000004561.8	protein_coding	Mettl17	5.75	4.78	5.16	6.51	6.2	7.34	6.45	5.41	7.56
ENSMUSG00000004562.8	protein_coding	Arhgef40	19.2	15.82	21.89	14.59	14.74	23.19	16.09	16.19	21.69
ENSMUSG00000004565.8	protein_coding	Pnpla6	7.73	6.48	8.52	6.18	6.79	8.38	6.58	7.15	8.01
ENSMUSG00000004567.8	protein_coding	Mcoln1	49.26	34.84	47.69	36	45.22	40.64	31.56	31.07	40.26
ENSMUSG00000004568.6	protein_coding	Arhgef18	14.79	8.08	14.87	11.21	9.98	14.92	12.83	10.85	15.83
ENSMUSG00000004591.9	protein_coding	Pkn2	37.09	36.97	37.08	37.67	42.06	38.48	39.8	42.91	40.93
ENSMUSG00000004609.5	protein_coding	Cd33	0.05	0.06	0.04	0.01	0.06	0.02	0.05	0.21	0.03
ENSMUSG00000004610.3	protein_coding	Etfb	30.44	19.37	46.12	48.78	36.64	68.18	50.21	40.04	80.93
ENSMUSG00000004612.7	protein_coding	Nkg7	0	0	0	0	0	0	0	0	0.06
ENSMUSG00000004613.5	protein_coding	Lim2	0	0	0.02	0	0	0	0	0.04	0.05
ENSMUSG00000004626.8	protein_coding	Stxbp2	20.89	17.27	20.41	18.58	18.69	25.15	18.07	20.17	22.86
ENSMUSG00000004630.12	protein_coding	Pcp2	0.21	0.2	0.12	0.24	0.2	0.18	0.14	0.06	0.44
ENSMUSG00000004631.9	protein_coding	Sgce	31.18	20.01	32.34	36.56	27.42	40.8	31.98	25.38	38.17
ENSMUSG00000004633.9	protein_coding	Chn2	0.04	0	0.07	0.07	0.1	0.07	0.07	0.07	0.05
ENSMUSG00000004637.9	protein_coding	Wwox	5.51	4.4	5.86	5.29	5.05	5.95	5.12	4.9	6.45
ENSMUSG00000004642.7	protein_coding	Slbp	142.28	113.02	144.99	122.59	125.61	125.06	116.55	124.56	112.79
ENSMUSG00000004651.4	protein_coding	Tyr	0	0	0.01	0	0	0	0	0.01	0
ENSMUSG00000004654.4	protein_coding	Ghrhr	0	0	0	0	0	0	0	0	0
ENSMUSG00000004655.5	protein_coding	Aqp1	15.03	2.94	23.05	6.72	4.5	5.91	7.53	4.39	4.32
ENSMUSG00000004661.8	protein_coding	Arid3b	1.28	0.55	1.09	1.64	1.17	1.01	1.06	1.46	1.31
ENSMUSG00000004665.4	protein_coding	Cnn2	127.54	25.64	120.88	144.7	65.42	139.12	170.33	94.54	170.96
ENSMUSG00000004667.11	protein_coding	Polr2e	53.59	51.73	54.19	59.2	61.84	66.86	66.3	65.91	80.58
ENSMUSG00000004668.7	protein_coding	Abca13	0	0	0	0	0	0.01	0	0	0.01
ENSMUSG00000004677.8	protein_coding	Myo9b	26.27	24.05	24.61	18.58	26.48	22.44	23.51	27.31	25.19
ENSMUSG00000004698.8	protein_coding	Hdac9	1.97	0.26	3.6	0.58	0.6	1.49	0.34	0.29	1.68
ENSMUSG00000004707.8	protein_coding	Ly9	0.01	0	0	0	0	0	0.02	0	0
ENSMUSG00000004709.8	protein_coding	Cd244	0	0	0	0	0	0	0	0	0
ENSMUSG00000004730.7	protein_coding	Emr1	0	0	0	0	0	0	0	0	0
ENSMUSG00000004748.5	protein_coding	Mtfp1	1.5	1.27	2.01	1.58	2.04	2.4	2.05	2.16	2.13
ENSMUSG00000004768.8	protein_coding	Rab23	12.38	10.6	11.5	10.79	10.94	10.62	11.5	11.87	11.23
ENSMUSG00000004771.6	protein_coding	Rab11a	81.54	84.95	88.81	82.01	79.9	81.84	78.6	85.93	98.27
ENSMUSG00000004788.5	protein_coding	Eif2b2	28.72	30.25	29.03	30.78	32.18	32.15	28.47	36.35	30.98
ENSMUSG00000004789.8	protein_coding	Dlst	39.54	41.2	38.58	43.7	41.04	46.43	50.06	48.26	55.99
ENSMUSG00000004791.6	protein_coding	Pgf	6.59	5.91	10.46	6.26	4.45	5.62	5.73	5.7	5.88
ENSMUSG00000004798.8	protein_coding	Ulk2	10.26	7.05	10.62	10.2	8.33	10.38	10.27	8.53	10.14
ENSMUSG00000004814.7	protein_coding	Ccl24	0.05	0	0.04	0	0	0	0	0	0.03
ENSMUSG00000004815.6	protein_coding	Dgkq	11.1	7.85	10.12	7.98	8.4	10.84	7.65	7.21	11.21
ENSMUSG00000004821.1	protein_coding	Tmed11	0	0	0	0	0	0	0	0	0
ENSMUSG00000004837.2	protein_coding	Grap	0.09	0.2	0.41	0.05	0.19	0.41	0.04	0.21	0.72
ENSMUSG00000004842.9	protein_coding	Pou1f1	0.03	0.03	0.06	0.02	0	0	0	0.03	0.02
ENSMUSG00000004843.6	protein_coding	Chmp2b	30.23	22.75	34.24	21.53	19.49	20.51	20.77	20.03	21.11
ENSMUSG00000004846.4	protein_coding	Plod3	71.96	61.73	51.33	55.24	70.16	51.05	61.98	70.3	44.38
ENSMUSG00000004849.8	protein_coding	Ap1s1	49.87	39.96	52.45	56.39	49.14	50.54	50.88	46.87	53.89
ENSMUSG00000004864.6	protein_coding	Mapk13	2.4	3.91	4.44	1.91	1.82	5.16	2.83	4.91	7.21
ENSMUSG00000004865.9	protein_coding	Srpk1	40.58	43.87	34.52	40.52	42.84	36.75	46.48	47.76	43.08
ENSMUSG00000004872.9	protein_coding	Pax3	17.38	11.13	16.56	13.01	14.63	12.37	15.05	13.45	12.74
ENSMUSG00000004880.6	protein_coding	Lbr	48.02	61.41	52.5	37.11	46.77	34.8	41.06	53.33	39.21
ENSMUSG00000004885.5	protein_coding	Crabp2	1.64	2.19	1.09	0.55	1.69	0.58	0.64	2.14	0.89
ENSMUSG00000004891.10	protein_coding	Nes	8.92	7.74	9.48	14.15	13.97	16.89	19.16	17.4	23.83
ENSMUSG00000004892.8	protein_coding	Bcan	0.01	0.07	0.02	0.02	0.01	0.01	0.02	0.02	0.02
ENSMUSG00000004894.4	protein_coding	Hapln2	0.05	0	0.01	0.02	0	0.02	0.02	0.02	0.02
ENSMUSG00000004895.8	protein_coding	Prcc	19.19	16.65	20.33	19.19	19.92	21.62	20.95	19.69	22.13
ENSMUSG00000004896.10	protein_coding	Rrnad1	8.9	7.62	9.22	8.59	8.18	10.02	8.21	8.65	11.18
ENSMUSG00000004897.10	protein_coding	Hdgf	152.48	146.22	145.61	149.71	154.96	138.11	172.53	169.67	171.75
ENSMUSG00000004902.5	protein_coding	Slc25a18	0.26	0.25	0.13	0.15	0.17	0.17	0.18	0.23	0.18
ENSMUSG00000004929.6	protein_coding	Thop1	22.75	24.63	21.49	27.98	32	28.68	33.39	33.88	36.03
ENSMUSG00000004931.9	protein_coding	Apba3	28.29	30.65	29.3	25.65	27.44	30.91	27.19	31.82	30.97
ENSMUSG00000004933.10	protein_coding	Matk	1.56	1.22	1.45	1.4	1.64	1.71	1.64	1.39	1.41
ENSMUSG00000004934.7	protein_coding	Pias4	20.34	15.36	20.14	20.37	20.3	26.04	22.65	17.58	27.17
ENSMUSG00000004936.8	protein_coding	Map2k1	44.18	94.79	34.82	36.03	66.31	34.81	40.86	72.67	35.29
ENSMUSG00000004937.5	protein_coding	Sgta	41.4	32.15	43.46	42.22	43.22	51.2	44.52	42.17	53.03
ENSMUSG00000004939.6	protein_coding	Itgb1bp3	0.03	0.01	0	0	0.01	0.01	0	0	0
ENSMUSG00000004945.8	protein_coding	5730437N04Rik	27.49	21.18	32.68	33.54	25.36	32.75	33.64	28.13	34.15
ENSMUSG00000004947.8	protein_coding	Dtx2	11.06	8.4	10.71	9.87	10.76	10.69	9.08	9.49	10.69
ENSMUSG00000004948.6	protein_coding	Zp3	0.14	0.02	0.08	0.17	0.04	0.2	0.03	0	0.11
ENSMUSG00000004951.9	protein_coding	Hspb1	28.92	14.92	25.02	31.45	18.34	35.57	30.55	24.24	30.57
ENSMUSG00000004952.7	protein_coding	Rasa4	5.67	1.66	3.99	4.51	3.04	5.28	3.75	3.08	5.54
ENSMUSG00000004961.6	protein_coding	Syt5	0.07	0.21	0.09	0.05	0.12	0.07	0.07	0.1	0
ENSMUSG00000004980.9	protein_coding	Hnrnpa2b1	130.67	147.3	147.15	88.7	120.47	86.69	101.63	118.91	100.81
ENSMUSG00000004988.7	protein_coding	Fxyd4	0.28	0.27	0.21	0.26	0.27	0.41	0.45	0.4	0.34
ENSMUSG00000004994.6	protein_coding	Ccdc130	11.29	8.15	11.95	7.3	10.8	11.53	7.91	7.92	11.26
ENSMUSG00000004996.3	protein_coding	Mri1	14.33	16.08	13.92	14.36	16.33	17.79	17.29	16.17	18.26
ENSMUSG00000005034.8	protein_coding	Prkacb	29.1	24.89	31.14	27.69	27.36	33.04	28.42	29.17	31.39
ENSMUSG00000005043.7	protein_coding	Sgsh	5.04	3.03	6.18	4.87	4.9	5.66	6.1	5.09	5.26
ENSMUSG00000005045.9	protein_coding	Chd5	0.09	0.17	0.14	0.08	0.09	0.13	0.12	0.08	0.14
ENSMUSG00000005054.6	protein_coding	Cstb	223.9	238.63	240.35	231.62	297.07	221.88	231.09	272.33	265.96
ENSMUSG00000005057.9	protein_coding	Sh2b2	4.34	3.67	3.87	3.56	3.68	3.39	3.06	3.4	3.03
ENSMUSG00000005069.6	protein_coding	Pex5	19.95	24.42	21.91	20.69	20.97	24.43	23.47	25.14	26.73
ENSMUSG00000005078.10	protein_coding	Jkamp	14.99	13.82	17.11	14.62	14.5	18.47	15.16	15.5	16.42
ENSMUSG00000005087.10	protein_coding	Cd44	38.14	24.32	31.43	37.84	29.23	36.43	45.96	43.65	46.93
ENSMUSG00000005089.8	protein_coding	Slc1a2	0.31	0.01	0.43	0.36	0.05	0.19	0.34	0.01	0.11
ENSMUSG00000005102.6	protein_coding	Eif2ak4	11.65	8.1	11.04	10.11	11.03	12.18	10.24	9.87	11.58
ENSMUSG00000005103.9	protein_coding	Wdr1	99.02	72.77	99.19	125.47	91	127.51	146.07	116.77	164.85
ENSMUSG00000005107.7	protein_coding	Slc2a9	0.84	0.37	0.8	1.01	0.76	1.1	0.79	0.47	1.26
ENSMUSG00000005124.3	protein_coding	Wisp1	42.12	49.77	41.06	35.62	59.43	30.32	41.52	53.89	30.53
ENSMUSG00000005125.6	protein_coding	Ndrg1	36.71	28.82	18.1	32.73	27.54	14.86	31.53	26.57	13.47
ENSMUSG00000005131.2	protein_coding	4930550C14Rik	0.27	0.35	0.25	0.23	0.17	0.29	0.11	0.32	0.22
ENSMUSG00000005142.9	protein_coding	Man2b1	25.58	12.87	26.19	24.23	20.36	26.7	22.12	21.35	29.18
ENSMUSG00000005148.7	protein_coding	Klf5	3.37	2.16	3.43	2.98	3.78	3.2	4.04	3.61	4.42
ENSMUSG00000005150.9	protein_coding	Wdr83	10.64	8.93	11.51	8.87	9.64	9.67	8.01	9.64	11.67
ENSMUSG00000005161.9	protein_coding	Prdx2	197.74	164.38	192.7	196.54	138.14	179.92	197.25	192.08	199.16
ENSMUSG00000005198.9	protein_coding	Polr2a	14.11	7.99	9.74	7.59	11.13	9.89	11.36	22.35	12.88
ENSMUSG00000005202.2	protein_coding	Shbg	0.06	0.22	0.08	0.04	0.09	0.02	0.05	0.14	0.03
ENSMUSG00000005204.5	protein_coding	Senp3	36.25	39.21	39.6	43.27	51.4	48.98	45.5	49.56	53.38
ENSMUSG00000005220.2	protein_coding	Corin	0.02	0.04	0.02	0.02	0.02	0.02	0.03	0.07	0.03
ENSMUSG00000005225.9	protein_coding	Plekha8	4.98	3.75	5.48	5.03	4.3	6.54	5.7	5.49	7.64
ENSMUSG00000005232.5	protein_coding	G6pc2	0	0	0	0	0	0	0	0	0
ENSMUSG00000005233.9	protein_coding	Spc25	38.57	30.12	47.33	39.43	32.87	31.21	33.86	34.02	34.85
ENSMUSG00000005237.7	protein_coding	Dnahc2	0.16	0.06	0.14	0.09	0.1	0.19	0.13	0.07	0.1
ENSMUSG00000005251.8	protein_coding	Ripk4	0	0.01	0	0	0	0	0	0.01	0.01
ENSMUSG00000005262.6	protein_coding	Ufd1l	28.51	28.4	27.72	23.91	25.13	24.51	24.28	26.21	28.27
ENSMUSG00000005267.6	protein_coding	Zfp287	6.08	4.48	6.21	6.14	5.85	7.37	6.78	5.12	7.35
ENSMUSG00000005268.13	protein_coding	Prlr	0.37	0.13	0.14	0.16	0.3	0.15	0.32	0.48	0.24
ENSMUSG00000005299.5	protein_coding	Letm1	9.09	9.04	10.03	7.69	8.11	8.36	9.88	9.04	9.89
ENSMUSG00000005312.7	protein_coding	Ubqln1	28.12	28.81	28.95	27.16	27.68	29.31	31.01	32.02	33.27
ENSMUSG00000005320.8	protein_coding	Fgfr4	0.01	0.05	0.02	0.01	0.01	0.01	0.02	0.01	0.01
ENSMUSG00000005338.6	protein_coding	Cadm3	0.49	0.3	0.3	0.45	0.76	0.51	0.57	0.52	0.21
ENSMUSG00000005339.5	protein_coding	Fcer1a	0	0	0	0	0	0	0	0	0
ENSMUSG00000005354.9	protein_coding	Txn2	39.63	33.59	36.7	57.85	42.48	48.75	52.79	41.35	54.7
ENSMUSG00000005355.7	protein_coding	Casp14	0.04	0	0.08	0.1	0.05	0.1	0.06	0.02	0.03
ENSMUSG00000005357.8	protein_coding	Slc1a6	2	0.22	2.62	1.81	0.72	2.64	1.56	0.4	3.41
ENSMUSG00000005360.8	protein_coding	Slc1a3	6.05	2.4	12.8	5.67	3.15	8.27	13.47	3.7	6.49
ENSMUSG00000005362.8	protein_coding	Crbn	17.18	11.78	17.09	16.5	15.65	19.58	17.89	15.9	20.19
ENSMUSG00000005364.8	protein_coding	Il5ra	0	0	0	0	0	0	0	0.02	0
ENSMUSG00000005370.3	protein_coding	Msh6	39.59	40.56	39.88	38.89	43.11	42.43	41.24	45.25	43.37
ENSMUSG00000005371.8	protein_coding	Fbxo11	13.31	9.3	10.88	10.21	11.56	10.96	10.74	15.36	11.33
ENSMUSG00000005373.6	protein_coding	Mlxipl	0.09	0.19	0.11	0.02	0.06	0.04	0.06	0.06	0.04
ENSMUSG00000005374.7	protein_coding	Tbl2	14.35	14.34	17.08	11.92	12.88	12.96	12.66	14.4	12.95
ENSMUSG00000005378.10	protein_coding	Wbscr22	25.79	22.84	30.05	20.65	24.2	24.87	23.9	26.49	26.12
ENSMUSG00000005397.7	protein_coding	Nid1	47.88	21.89	51.76	46.76	48.25	64.73	58.31	65.54	75.55
ENSMUSG00000005410.4	protein_coding	Mcm5	89.98	94.77	93.65	82.4	93.48	85.77	89.56	89.82	83.38
ENSMUSG00000005413.6	protein_coding	Hmox1	93.19	129.03	90.56	108.63	101.38	85.24	90.35	60.44	79.89
ENSMUSG00000005417.10	protein_coding	Mprip	116.05	84.47	120.88	124.3	115.64	148.96	145.37	135.13	158.24
ENSMUSG00000005442.6	protein_coding	Cic	40.85	30.06	36.51	24.05	34.22	35.03	27.74	36.2	35.03
ENSMUSG00000005447.6	protein_coding	Pafah1b3	41.08	39.83	43.46	47.2	48.83	58.08	52.5	62.81	57.37
ENSMUSG00000005465.7	protein_coding	Il27ra	1.37	1.09	1.35	1.34	1.14	1.48	0.71	0.67	1.51
ENSMUSG00000005469.8	protein_coding	Prkaca	65.15	45.05	75.27	63.46	52.09	73.02	66.18	56.9	75.65
ENSMUSG00000005470.8	protein_coding	Asf1b	32.72	33.05	32.23	26.89	30.54	26.44	31.22	33.81	29.63
ENSMUSG00000005474.5	protein_coding	Myl10	0	0	0	0	0	0	0	0	0
ENSMUSG00000005481.10	protein_coding	Ddx39	60.61	65.17	57.91	60.16	54.14	54.88	71.74	61.38	73.49
ENSMUSG00000005483.8	protein_coding	Dnajb1	28.71	26.59	28.98	24.94	25.05	27.46	25.42	25	26.91
ENSMUSG00000005493.8	protein_coding	Msh4	0.13	0.16	0.19	0.06	0.19	0.15	0.16	0.19	0.25
ENSMUSG00000005501.7	protein_coding	Usp40	9.65	8.93	10.14	7.98	9.9	8.8	9.53	10.23	9.03
ENSMUSG00000005503.8	protein_coding	Evx1	0	0	0	0	0	0	0	0	0
ENSMUSG00000005505.6	protein_coding	Kbtbd4	16.06	12.41	17.64	17.25	14.73	20.09	17.56	16.07	16.91
ENSMUSG00000005506.9	protein_coding	Celf1	29.11	33.79	29.11	23	36.13	23.95	28.28	39.92	30.11
ENSMUSG00000005510.3	protein_coding	Ndufs3	50.41	45.08	51.9	53.75	52.14	56.14	53.05	53.19	58.92
ENSMUSG00000005514.8	protein_coding	Por	59.1	67.01	73.55	56.85	73.08	67.1	62.35	64.94	78.39
ENSMUSG00000005533.8	protein_coding	Igf1r	11.97	4.72	7.93	8.15	6.7	8.69	10.6	9.67	9.9
ENSMUSG00000005534.8	protein_coding	Insr	13.99	10.14	13.87	9.16	10.29	13.28	11.03	12.45	15.77
ENSMUSG00000005540.8	protein_coding	Fcer2a	0.22	0.09	0.19	0.18	0.09	0.1	0.15	0.19	0.11
ENSMUSG00000005547.8	protein_coding	Cyp2a5	0	0	0	0	0	0	0	0	0
ENSMUSG00000005553.7	protein_coding	Atp4a	0.01	0.01	0.01	0.01	0.01	0.03	0.02	0.02	0.02
ENSMUSG00000005566.7	protein_coding	Trim28	129.55	128.83	130.27	145.95	145.94	158.44	161.3	158.89	178.06
ENSMUSG00000005575.8	protein_coding	Ube2m	48.35	56.33	52.71	55.53	57.79	55.06	56.7	61.22	67.01
ENSMUSG00000005580.4	protein_coding	Adcy9	4.78	2.69	3.87	3.37	3.07	3.76	3.23	2.62	3.19
ENSMUSG00000005583.8	protein_coding	Mef2c	5.9	2.46	7.06	2.79	2.74	4.33	1.89	2.25	3.46
ENSMUSG00000005609.8	protein_coding	Ctr9	19.45	15.07	21.57	21.76	20.37	30.42	22.38	21.65	31.1
ENSMUSG00000005610.10	protein_coding	Eif4g2	142.69	129.31	165.02	129	138.57	154.41	159.07	163.96	178.73
ENSMUSG00000005611.8	protein_coding	Mrvi1	0.98	0	0.93	1.15	0.14	2.43	0.29	0.07	1.21
ENSMUSG00000005615.8	protein_coding	Pcyt1a	20.98	12.6	21.65	16.55	14.79	17.32	16.1	14.75	19
ENSMUSG00000005621.9	protein_coding	Zfp592	9.38	7.84	9.05	7.47	7.5	8.73	7.54	8.36	7.79
ENSMUSG00000005625.9	protein_coding	Psmd4	108.52	131.67	119.54	117.5	146.52	135.85	128.5	156.05	147.98
ENSMUSG00000005628.6	protein_coding	Tmod4	0.17	0.3	0.26	0.29	0.33	0.14	0.17	0.13	0.24
ENSMUSG00000005640.5	protein_coding	Insrr	0	0.01	0.01	0	0.01	0.02	0.01	0.02	0.03
ENSMUSG00000005649.10	protein_coding	Cabp5	0.03	0.08	0.09	0.05	0.03	0.05	0.1	0.08	0.02
ENSMUSG00000005656.8	protein_coding	Snx6	27.26	25.52	30.18	32.59	26.47	32.31	32.28	30.33	36.69
ENSMUSG00000005667.6	protein_coding	Mthfd2	28.72	85.46	34.19	35.83	72.72	35.2	45.58	58.41	39.9
ENSMUSG00000005672.6	protein_coding	Kit	0.01	0	0.04	0.07	0.01	0	0.01	0	0
ENSMUSG00000005674.3	protein_coding	Tomm40l	10.01	10.13	10.34	9.98	9.63	10.54	9.3	10.13	11.92
ENSMUSG00000005677.7	protein_coding	Nr1i3	0.31	0.33	0.25	0.2	0.26	0.23	0.15	0.22	0.33
ENSMUSG00000005681.6	protein_coding	Apoa2	0.63	0.24	0.81	0.57	0.78	0.72	0.85	0.87	0.33
ENSMUSG00000005682.7	protein_coding	Pan2	9.39	6.56	9.18	7.39	8.61	9.6	7.32	8.17	10.66
ENSMUSG00000005683.7	protein_coding	Cs	68.46	61.05	68.66	78.58	69.21	81.91	92.16	84.19	96.93
ENSMUSG00000005686.9	protein_coding	Ampd3	4.82	3.96	5.59	3.11	3.95	2.71	3.69	4.99	4.32
ENSMUSG00000005687.8	protein_coding	Bcas2	40	34.96	41.9	42.9	40.52	43.02	41.16	40.09	45.62
ENSMUSG00000005696.5	protein_coding	Sh2d1a	0	0	0	0	0	0	0	0	0
ENSMUSG00000005698.9	protein_coding	Ctcf	35.11	34.73	36.9	30.95	32.42	29.83	31.09	34.79	32.62
ENSMUSG00000005699.8	protein_coding	Pard6a	6.95	7.67	8.22	6.64	7.76	7.83	6.86	5.53	8.24
ENSMUSG00000005705.5	protein_coding	Agrp	0.48	0.38	0.3	0.2	0.23	0.38	0.41	0.41	0.07
ENSMUSG00000005716.10	protein_coding	Pvalb	0	0	0.03	0	0	0	0	0	0
ENSMUSG00000005718.7	protein_coding	Tcfap4	6.71	5.01	4.18	4.01	4.2	3.57	4.47	3.55	3.52
ENSMUSG00000005732.8	protein_coding	Ranbp1	146.36	164.74	136.74	128.52	141.22	118.9	135.91	145.6	136.1
ENSMUSG00000005763.8	protein_coding	Cd247	0.43	0.25	0.13	0.12	0.12	0.1	0.19	0.13	0.15
ENSMUSG00000005774.5	protein_coding	Rfx5	10.56	8.71	10.75	9.18	10.41	8.6	10.25	8.9	10.13
ENSMUSG00000005779.6	protein_coding	Psmb4	153.52	175.94	180.71	187.27	195.27	194.3	189.93	222.23	214.21
ENSMUSG00000005800.2	protein_coding	Mmp8	0.11	0.02	0.14	0.02	0.04	0.01	0.03	0.06	0.11
ENSMUSG00000005802.6	protein_coding	Slc30a4	23.77	25.18	25.09	24.97	33.58	28.08	33.96	34.38	28.28
ENSMUSG00000005803.7	protein_coding	Sqrdl	17.42	21.94	15.76	19.25	23.26	17.31	22.76	21.58	21.76
ENSMUSG00000005804.8	protein_coding	Pldn	7.75	6.88	8.02	8.53	9.47	10.04	9.05	9.83	9.54
ENSMUSG00000005813.8	protein_coding	Metap1	19.42	25.98	21.12	21.51	23.91	22.78	25.83	28.1	28.35
ENSMUSG00000005823.7	protein_coding	Gpr108	20.51	18.38	22.69	20.2	20.72	21.98	20.71	18.68	20.7
ENSMUSG00000005824.6	protein_coding	Tnfsf14	0	0.07	0	0	0.01	0	0	0.05	0
ENSMUSG00000005836.8	protein_coding	Gata6	4.21	2.75	4.94	5.34	4.57	9.07	5.31	5.29	11.14
ENSMUSG00000005846.10	protein_coding	Rsl1d1	51.14	75.15	48.32	48.3	58.63	46.99	58.56	66.52	57.01
ENSMUSG00000005864.7	protein_coding	Cnga2	0.02	0	0.12	0.02	0.02	0.11	0.01	0.12	0.02
ENSMUSG00000005871.7	protein_coding	Apc	21.09	15.55	21.29	18.41	19.83	22.37	19.63	24.52	23.16
ENSMUSG00000005873.5	protein_coding	Reep5	33.96	35.64	38.72	33.96	34.25	37.28	34.89	35.82	37.79
ENSMUSG00000005881.7	protein_coding	Ergic3	74.64	58.46	84	84.64	83.53	94.69	79.07	74.19	93.31
ENSMUSG00000005882.11	protein_coding	Uqcc	12.56	16.66	17.36	19.05	22.37	17.05	18.19	18.75	21.29
ENSMUSG00000005883.9	protein_coding	Spo11	0	0	0	0	0	0	0	0	0
ENSMUSG00000005886.8	protein_coding	Ncoa2	13.52	10.72	14.21	12.06	10.67	13.38	9.55	9.55	10.77
ENSMUSG00000005891.6	protein_coding	Prl4a1	0	0	0	0	0	0	0	0	0
ENSMUSG00000005892.4	protein_coding	Trh	0	0	0	0	0.02	0.02	0.02	0	0
ENSMUSG00000005893.8	protein_coding	Nr2c2	22.6	22.49	22.89	16.82	22.48	19.7	20.21	21.88	21.26
ENSMUSG00000005897.8	protein_coding	Nr2c1	3.37	3.17	3.27	3.44	2.85	4.09	3.36	3.15	4.15
ENSMUSG00000005899.6	protein_coding	Smpd4	21.07	18.27	23.39	19.66	19.81	23.09	19.16	18.87	21.9
ENSMUSG00000005907.8	protein_coding	Pex1	4.97	3.55	6.04	4.19	4.11	4.69	3.74	4.04	5.65
ENSMUSG00000005917.8	protein_coding	Otx1	0.25	0.06	0.28	0.16	0.09	0.16	0.28	0.23	0.21
ENSMUSG00000005936.11	protein_coding	Kctd20	24.13	18.62	22.55	27.96	22.72	25.06	26.72	25.9	32.27
ENSMUSG00000005947.5	protein_coding	Itgae	0.22	0.14	0.22	0.21	0.23	0.26	0.16	0.15	0.25
ENSMUSG00000005949.3	protein_coding	Ctns	22.69	11.46	21.69	19.6	19.75	22.89	17.72	12.5	20.43
ENSMUSG00000005950.8	protein_coding	P2rx5	2.53	0.51	2.63	2.07	1.86	3.04	1.92	1.13	2.25
ENSMUSG00000005951.6	protein_coding	Shpk	0.58	0.42	0.97	0.84	0.76	1.18	0.83	0.67	1.88
ENSMUSG00000005952.9	protein_coding	Trpv1	0.02	0	0	0	0	0	0	0.07	0.09
ENSMUSG00000005958.7	protein_coding	Ephb3	11.83	4	12.28	7.92	5.69	11.15	7.96	6.13	10.22
ENSMUSG00000005968.7	protein_coding	Tuft1	4.66	3.54	4.12	4.81	4.31	5.57	4.53	4.56	4.83
ENSMUSG00000005973.6	protein_coding	Rcn1	42.41	48.33	46.62	44.93	54.15	47.76	49.82	55.06	51.35
ENSMUSG00000005980.8	protein_coding	Dnase1	1.48	1.05	1.09	0.87	1.04	1.43	1.13	0.86	1.19
ENSMUSG00000005981.9	protein_coding	Trap1	24.89	24.73	23.24	21.92	22.04	22.49	22.96	23	25.52
ENSMUSG00000005982.6	protein_coding	Nat15	14.24	11.69	17.31	9.58	10.43	12.53	10.67	12.29	12.54
ENSMUSG00000005983.8	protein_coding	1700037C18Rik	3.26	2.19	2.89	1.92	2.05	2.42	1.96	1.87	2.9
ENSMUSG00000005986.8	protein_coding	Ankrd13d	2.59	2.55	3.67	2.52	2.39	4.9	1.99	2.12	4.88
ENSMUSG00000005994.8	protein_coding	Tyrp1	0	0	0	0	0	0	0	0	0
ENSMUSG00000006005.9	protein_coding	Tpr	57.1	52.76	55.49	41.59	56.15	44.82	48.01	54.91	46.44
ENSMUSG00000006007.7	protein_coding	Pdc	0	0.02	0.02	0	0	0	0	0	0
ENSMUSG00000006010.8	protein_coding	BC003331	17.04	14.55	17.28	15.25	15.96	15.48	13.17	15.82	16.85
ENSMUSG00000006014.9	protein_coding	Prg4	0.21	0.33	0.15	0.19	0.15	0.16	0.18	0.18	0.1
ENSMUSG00000006019.9	protein_coding	Dhx34	4.65	2.83	4.14	3.93	4.57	4.47	4.02	3.69	4.86
ENSMUSG00000006021.5	protein_coding	Kptn	5.32	4.5	7.73	7.45	6.4	9.6	8.31	6.79	9.28
ENSMUSG00000006024.6	protein_coding	Napa	49.47	46.82	50.99	49.19	57.82	52.17	49.92	51.95	56.26
ENSMUSG00000006050.4	protein_coding	Sra1	48.97	50.68	57.42	55.6	53.69	56.64	54.25	56.98	60.77
ENSMUSG00000006056.6	protein_coding	Calcoco2	0.02	0.02	0.02	0.02	0	0.02	0.02	0.06	0
ENSMUSG00000006057.8	protein_coding	Atp5g1	109.22	105.62	118.03	165.47	148.29	164.89	168.42	162.35	201.31
ENSMUSG00000006058.4	protein_coding	Snf8	29.32	28.48	32.34	36.05	34.53	35.96	34.38	33.07	34.99
ENSMUSG00000006095.6	protein_coding	Tbcb	32.02	31.64	33.64	36.74	35.55	38.06	40.07	39.31	45.12
ENSMUSG00000006127.3	protein_coding	Inpp5k	9.11	6.8	10.44	10.54	11.41	11.49	10.29	10.47	12.55
ENSMUSG00000006134.3	protein_coding	Crkl	21.34	18.34	19.8	17.29	18.05	18.57	17.47	18.27	18.49
ENSMUSG00000006143.6	protein_coding	2310043J07Rik	0.05	0	0.05	0.1	0	0	0	0.05	0
ENSMUSG00000006154.7	protein_coding	Eps8l1	1.07	0.68	1.2	1.54	1.18	1.51	1.14	0.67	0.95
ENSMUSG00000006169.12	protein_coding	Clint1	22.6	29.09	24.63	23.93	30.24	25.83	26.44	30.06	28.64
ENSMUSG00000006179.2	protein_coding	Prss16	3.85	3.67	4.33	2.49	3.12	2.46	3.46	3.41	1.87
ENSMUSG00000006191.10	protein_coding	Cdkal1	10.1	7.95	9.37	9.06	9.42	9.69	8.6	8.31	9.35
ENSMUSG00000006200.3	protein_coding	Rhox6	0	0	0	0	0	0	0	0	0
ENSMUSG00000006204.5	protein_coding	5430419D17Rik	0	0	0	0	0	0.01	0	0	0.04
ENSMUSG00000006205.7	protein_coding	Htra1	11	3.1	10.13	21.18	12.38	15.99	14.73	8.97	12.18
ENSMUSG00000006215.6	protein_coding	Zbtb17	13.3	12.5	15.02	15.26	17.25	20.79	18.95	17.35	21.62
ENSMUSG00000006216.4	protein_coding	Clcnkb	0.31	0	0.03	0.02	0.18	0.01	0.01	0.01	0.22
ENSMUSG00000006218.4	protein_coding	Fam131c	0.57	0.53	0.6	0.56	0.29	0.59	0.53	0.32	0.33
ENSMUSG00000006219.6	protein_coding	Fblim1	15.62	22.55	10.62	6.74	21.62	6.49	12.32	30.18	8.1
ENSMUSG00000006221.7	protein_coding	Hspb7	2.54	2.08	2.22	1	1.97	0.94	1.12	1.46	0.57
ENSMUSG00000006235.5	protein_coding	Epor	0.23	0.2	0.26	0.12	0.4	0.51	0.17	0.31	0.25
ENSMUSG00000006241.8	protein_coding	Ccdc159	1.07	0.82	1.45	1.47	1.54	2.33	1.15	1.26	1.79
ENSMUSG00000006262.9	protein_coding	Mob1b	13.02	10.97	12.47	8.23	10.78	10.16	10.24	12.51	10.29
ENSMUSG00000006269.6	protein_coding	Atp6v1b1	0.12	0.08	0.11	0.08	0.08	0.07	0.08	0.12	0.04
ENSMUSG00000006270.4	protein_coding	Vax1	0	0	0	0	0	0.01	0	0	0
ENSMUSG00000006273.8	protein_coding	Atp6v1b2	56.5	41.04	42.98	44.69	44.14	36.11	38.52	32.16	39.36
ENSMUSG00000006276.8	protein_coding	Eps15l1	16.97	12.44	16.57	15.05	13.19	16.99	14.8	13.7	18.79
ENSMUSG00000006281.7	protein_coding	Tep1	2.18	1.94	1.77	1.56	2.23	1.63	1.87	2.02	1.65
ENSMUSG00000006288.6	protein_coding	Ttc5	8.56	6.27	9.19	8.54	7.95	11.37	9.17	8.91	12.42
ENSMUSG00000006289.8	protein_coding	Osgep	22.73	14.16	23.99	21.08	19.19	25.9	23.41	18.82	28.75
ENSMUSG00000006299.6	protein_coding	Aamp	59.47	58.68	64.67	53.46	57.71	59.79	57.07	64.31	61.85
ENSMUSG00000006301.10	protein_coding	Tmbim1	25.53	26.8	28.78	23.73	26.8	24.92	24.39	27.03	29.72
ENSMUSG00000006304.8	protein_coding	Arpc2	92.76	87.7	109.05	96.66	83.24	93.9	97.13	94.55	106.08
ENSMUSG00000006307.9	protein_coding	Wbp7	6.22	5.04	4.72	3.93	5.45	5.12	5.39	5.94	5.65
ENSMUSG00000006310.10	protein_coding	Zbtb32	0.19	0.1	0.17	0.14	0.18	0.23	0.34	0.15	0.18
ENSMUSG00000006311.6	protein_coding	Etv2	0	0.03	0	0	0	0.03	0.03	0	0
ENSMUSG00000006313.4	protein_coding	Upk1a	0.33	0.14	0.15	0.04	0.24	0.16	0.15	0.2	0.31
ENSMUSG00000006315.8	protein_coding	Tmem147	27.21	40.53	34	33.13	36.21	36.59	36.57	39.71	42.33
ENSMUSG00000006333.8	protein_coding	Rps9	569.4	662.78	478.63	701.8	617.59	580.94	722.88	690.18	698.31
ENSMUSG00000006335.9	protein_coding	Tfpt	8.95	8.18	9.03	9.79	12.18	10.31	10.28	11.36	11.06
ENSMUSG00000006342.8	protein_coding	Susd2	1.75	0.2	3.32	2.23	0.56	2.53	1.91	0.63	2.48
ENSMUSG00000006344.9	protein_coding	Ggt5	3.22	0	1.46	2.06	0.19	0.67	1.93	0.3	0.67
ENSMUSG00000006345.4	protein_coding	Ggt1	0.1	0.05	0.13	0.04	0	0.15	0	0	0.29
ENSMUSG00000006356.6	protein_coding	Crip2	44.23	10.05	48.44	59.6	25.15	53.2	47.44	18	47.29
ENSMUSG00000006360.7	protein_coding	Crip1	55.7	49.83	70.4	65.2	46.91	50.25	46.04	46.77	31.81
ENSMUSG00000006362.9	protein_coding	Cbfa2t3	0.07	0.02	0.3	0.05	0.02	0.04	0.35	0.02	0.04
ENSMUSG00000006369.8	protein_coding	Fbln1	92.25	46.28	107.11	47.37	47	100.02	39.02	49.69	92.37
ENSMUSG00000006373.9	protein_coding	Pgrmc1	92.06	87.9	110.33	87.47	81.7	99.43	83.62	74.07	90.83
ENSMUSG00000006378.7	protein_coding	Gcat	15.97	14.6	17.99	19.82	19.52	24.94	23.48	25.48	31.4
ENSMUSG00000006386.9	protein_coding	Tek	0.46	0.23	0.24	0.43	0.16	0.32	0.37	0.15	0.56
ENSMUSG00000006389.6	protein_coding	Mpl	0	0	0	0	0	0	0	0	0
ENSMUSG00000006390.9	protein_coding	Elovl1	48.52	51.66	52.33	48.36	53.75	46.77	52.44	49.71	55.51
ENSMUSG00000006392.10	protein_coding	Med8	30.99	35.95	33.19	32.07	35.28	29.76	34.9	38.17	37.01
ENSMUSG00000006395.9	protein_coding	Hyi	7.32	4.39	5.8	6.26	4.32	3.85	4.33	4.26	5.53
ENSMUSG00000006398.7	protein_coding	Cdc20	58.21	50.31	68.26	58.7	48.6	60.28	62.33	59.86	81.99
ENSMUSG00000006403.6	protein_coding	Adamts4	6.82	12.19	6.53	5.55	6.51	5.14	6.01	8.1	4.98
ENSMUSG00000006411.6	protein_coding	Pvrl4	0.04	0.05	0.1	0.02	0.02	0.12	0.03	0.05	0.04
ENSMUSG00000006412.4	protein_coding	Pfdn2	22.09	21.82	17.81	16.83	18.45	19	18.55	21.16	20.94
ENSMUSG00000006418.10	protein_coding	Rnf114	25.19	27.05	23.21	24.17	38.17	25.52	25.63	31.23	27.31
ENSMUSG00000006423.8	protein_coding	C330007P06Rik	44.2	37.75	49.28	38.83	41.17	39.34	39.77	41.87	40.66
ENSMUSG00000006435.9	protein_coding	Neurl1a	1.27	1.01	0.99	1.12	1.36	1.23	1.04	0.96	1.05
ENSMUSG00000006442.10	protein_coding	Srm	48.19	75.7	38.64	54.64	59.07	47.1	70.55	66.72	69.9
ENSMUSG00000006445.3	protein_coding	Epha2	17.04	17.04	16.89	18.5	19.49	24.92	25.33	18.06	25.89
ENSMUSG00000006456.9	protein_coding	Rbm14	57.52	51.17	63.12	61.86	59.28	80.24	64.39	59.74	76.9
ENSMUSG00000006457.3	protein_coding	Actn3	2.09	1.4	2.54	2.19	2.58	4.08	2.04	2.38	4.29
ENSMUSG00000006462.6	processed_transcript	A530013C23Rik	0.8	0.58	0.69	0.51	0.61	0.91	0.58	0.58	0.54
ENSMUSG00000006463.7	protein_coding	Zdhhc24	4.96	3.58	5.06	4.46	5.16	5.06	3.94	3.6	5.78
ENSMUSG00000006464.8	protein_coding	Bbs1	2.99	1.82	4.01	2.88	2.42	4.2	2.35	2.28	4.06
ENSMUSG00000006469.7	protein_coding	Slc34a3	0	0	0	0	0	0	0	0	0
ENSMUSG00000006471.10	protein_coding	Ndor1	8.04	7.5	7.14	6.02	8.83	6.73	8.33	8.53	7.17
ENSMUSG00000006476.12	protein_coding	Nelf	21.75	18.82	27.4	19.66	22.64	25.37	21.51	20.42	31.75
ENSMUSG00000006488.9	protein_coding	Prl7a1	0.04	0	0	0	0	0.03	0.04	0	0
ENSMUSG00000006490.2	protein_coding	Prl8a9	0	0	0	0	0	0	0	0	0
ENSMUSG00000006494.5	protein_coding	Pdk1	7.24	28.86	5.92	4.41	11.07	2.76	5.28	25.97	5.39
ENSMUSG00000006498.9	protein_coding	Ptbp1	150.61	144.91	142.75	147.2	151.31	157.4	172.02	175.16	194.93
ENSMUSG00000006517.4	protein_coding	Mvd	20.5	45.14	26.37	19.61	31.26	23.76	26.09	31.66	29.92
ENSMUSG00000006519.9	protein_coding	Cyba	75.84	51.12	74.83	81.16	80.23	83.29	71.2	79.51	94.82
ENSMUSG00000006522.9	protein_coding	Itih3	0.19	0	0.06	0.05	0.02	0.04	0.06	0.01	0.18
ENSMUSG00000006526.5	protein_coding	Tmem110	8.75	8.95	10.38	9.65	7.3	9.18	7.86	8.27	9.26
ENSMUSG00000006527.8	protein_coding	Sfmbt1	6.46	5.54	5.6	5.53	6.48	5.89	6.22	5.76	6.14
ENSMUSG00000006529.8	protein_coding	Itih1	0.02	0	0.01	0.03	0	0.03	0.02	0.13	0.02
ENSMUSG00000006538.8	protein_coding	Ihh	0.12	0.05	0.04	0.03	0.02	0.05	0.08	0.02	0.04
ENSMUSG00000006542.7	protein_coding	Prkag3	0.15	0.01	0.12	0.12	0.05	0.09	0.11	0.05	0.13
ENSMUSG00000006546.2	protein_coding	Cryba2	0	0	0.04	0	0	0	0	0	0
ENSMUSG00000006567.5	protein_coding	Atp7b	0.21	0.75	0.38	0.13	0.47	0.54	0.13	0.71	0.65
ENSMUSG00000006570.3	protein_coding	Defb2	0	0	0	0	0	0	0	0	0
ENSMUSG00000006574.9	protein_coding	Slc4a1	0	0	0	0	0.01	0	0	0	0
ENSMUSG00000006575.8	protein_coding	Rundc3a	0.47	0.74	0.79	0.47	0.76	0.38	0.6	0.74	0.72
ENSMUSG00000006576.9	protein_coding	Slc4a3	2.53	2.31	3.16	2.11	2.75	3.33	2	2.85	4.04
ENSMUSG00000006585.2	protein_coding	Cdt1	53.12	52.57	47.29	46.11	58.88	52.34	47.64	48.7	48.05
ENSMUSG00000006586.9	protein_coding	Runx1t1	13.61	6.19	13.76	10.88	11.71	14.1	11.2	11.75	12.62
ENSMUSG00000006587.5	protein_coding	Snai3	0.02	0.02	0	0.02	0	0.07	0	0.02	0.05
ENSMUSG00000006589.7	protein_coding	Aprt	83.42	73.19	81.25	103.44	68.04	98.79	106.97	82.23	132.48
ENSMUSG00000006599.6	protein_coding	Gtf2h1	30.62	31.12	31.92	30.41	34.37	30.16	29.69	28.92	34.3
ENSMUSG00000006611.8	protein_coding	Hfe	3.6	5.27	2.72	3.2	4.46	2.07	2.62	2.74	1.71
ENSMUSG00000006638.8	lincRNA	Abhd1	1.46	1.05	1.84	1.67	2.5	1.82	2.05	1.19	2.53
ENSMUSG00000006641.6	protein_coding	Slc5a6	6.79	4.28	8.26	5.15	5.06	5.13	6.96	4.21	7.65
ENSMUSG00000006642.2	protein_coding	Tcf23	0.12	0.04	0.16	0.09	0.07	0.22	0.05	0.04	0.17
ENSMUSG00000006649.9	protein_coding	Nphs1	0	0	0	0	0	0	0	0	0.01
ENSMUSG00000006651.6	protein_coding	Aplp1	0.95	0.68	1.26	0.77	0.51	0.97	0.54	0.37	0.52
ENSMUSG00000006673.8	protein_coding	Qrich1	53.5	44.99	53.45	52.32	51.97	55.24	55.68	54.37	57
ENSMUSG00000006675.5	protein_coding	P4htm	0.62	0.26	0.42	0.7	0.25	0.42	0.42	0.16	0.53
ENSMUSG00000006676.9	protein_coding	Usp19	29.38	23.06	31.25	23.32	27.37	26.29	24.11	25.5	26.42
ENSMUSG00000006678.5	protein_coding	Pola1	41.04	38.15	39.95	34.58	37.97	30.34	35.56	34.19	28.55
ENSMUSG00000006699.10	protein_coding	Cdc42	160.09	137.73	176.47	186.04	141.31	193.48	196.38	181.94	227.51
ENSMUSG00000006705.5	protein_coding	Pknox1	9.84	9.3	10.17	8.81	8.14	8.35	8.49	8.79	8.91
ENSMUSG00000006711.9	protein_coding	D130043K22Rik	0.06	0.06	0.06	0.09	0.09	0.09	0.16	0.07	0.28
ENSMUSG00000006715.4	protein_coding	Gmnn	24.92	30.9	25.06	26.69	31.5	24.86	27.03	34.9	23.46
ENSMUSG00000006717.6	protein_coding	Acot13	46.37	28.43	46.89	45.89	43.42	42.79	42.86	36.83	47.44
ENSMUSG00000006720.9	protein_coding	Zfp184	6.22	4.15	6.24	6.16	5.36	6.6	5.6	5.55	6.36
ENSMUSG00000006724.5	protein_coding	Cyp27b1	0.21	0.48	0.06	0.03	0.09	0.04	0.03	0.08	0.11
ENSMUSG00000006728.6	protein_coding	Cdk4	524.87	407.67	482.89	563.12	496.89	560.73	588.53	484.9	582.14
ENSMUSG00000006731.8	protein_coding	B4galnt1	12.38	11.66	9.39	10.78	12.27	11.58	9.33	10.02	9.83
ENSMUSG00000006732.8	protein_coding	Mettl1	7	12.75	6.12	6.88	8.08	6.68	9.06	8.43	8.64
ENSMUSG00000006736.8	protein_coding	Tspan31	47.4	38.45	51.5	55.02	49.73	64.51	54.43	53.38	59.77
ENSMUSG00000006740.7	protein_coding	Kif5b	43.62	42.01	47.75	44.17	58.23	51.49	49.33	57.23	59.73
ENSMUSG00000006763.6	protein_coding	Saal1	11.2	9	10.6	10.46	12.05	11.79	12.89	11.14	12.38
ENSMUSG00000006764.8	protein_coding	Tph2	0.12	0.3	0.18	0.05	0.1	0.08	0.08	0.17	0.13
ENSMUSG00000006777.7	protein_coding	Krt23	0	0	0	0	0	0	0	0	0.02
ENSMUSG00000006782.10	protein_coding	Cnp	8.46	4	9.53	12.68	9.58	12.8	10.15	8.72	11.12
ENSMUSG00000006784.8	protein_coding	Ttc25	0.36	0.11	0.48	0.27	0.33	0.47	0.35	0.24	0.52
ENSMUSG00000006800.7	protein_coding	Sulf2	17.93	1.32	17.29	20.88	2.78	17.1	11.83	1.72	19.1
ENSMUSG00000006818.4	protein_coding	Sod2	44.63	127.05	75.53	33.99	66.08	45.34	50.33	108.39	76.62
ENSMUSG00000006850.7	protein_coding	Tmco6	4.26	4.4	5.36	4.89	4.63	6.14	4.53	5.01	6.05
ENSMUSG00000006906.9	protein_coding	Stambp	2.35	1.34	1.62	2.22	1.69	1.97	1.75	1.94	1.86
ENSMUSG00000006920.8	protein_coding	Ezh1	9.04	5.82	8.81	9.47	8.79	10.49	9.1	7.87	11.58
ENSMUSG00000006930.8	protein_coding	Hap1	11.26	11.39	9.2	9.87	31.05	9.45	11.88	18.81	9.52
ENSMUSG00000006931.7	protein_coding	Leprel4	26.67	21.08	29.72	30.05	24.82	34.18	31.15	29.44	31.97
ENSMUSG00000006932.9	protein_coding	Ctnnb1	213.36	190.71	224.09	173.61	188.51	197.59	182.65	200.2	204.91
ENSMUSG00000006941.4	protein_coding	Eif1b	28.25	23.78	31.45	27.72	18.8	24.27	21.79	19.91	23.52
ENSMUSG00000006948.5	protein_coding	Klk4	0	0	0	0	0	0	0	0	0
ENSMUSG00000006958.7	protein_coding	Chrd	0.6	0.5	0.85	0.49	0.56	0.67	0.35	0.51	0.79
ENSMUSG00000006998.8	protein_coding	Psmd2	124.99	132.23	123.01	107.09	115.51	113.92	123.38	129.28	131.05
ENSMUSG00000007021.4	protein_coding	Syngr3	1.61	1.23	1.59	1.87	2.65	3.42	1.54	2.41	2.62
ENSMUSG00000007029.9	protein_coding	Vars	47.97	72.29	40.14	44.06	76.78	50.11	57.92	80.45	69.24
ENSMUSG00000007030.2	protein_coding	D17H6S56E-3	0.06	0.09	0.07	0.03	0.05	0.04	0.02	0.04	0.07
ENSMUSG00000007033.3	protein_coding	Hspa1l	1.73	1.1	1.57	1.44	1.04	1.41	1.56	1.41	1.11
ENSMUSG00000007034.8	protein_coding	Slc44a4	0.01	0	0.02	0	0	0.01	0.01	0	0.03
ENSMUSG00000007035.8	protein_coding	Msh5	2.84	1.51	2.47	2.34	1.5	2.94	1.73	1.43	3.24
ENSMUSG00000007036.8	protein_coding	Abhd16a	32.4	27.75	36.58	34.55	32.84	37.96	35.41	30.67	34.21
ENSMUSG00000007038.5	protein_coding	Neu1	22.34	13.65	26.48	24.7	19.7	27.85	20.53	16.87	29.02
ENSMUSG00000007039.6	protein_coding	Ddah2	58.56	19.11	64.04	70.87	44.92	72.59	64.79	52.48	67.19
ENSMUSG00000007041.9	protein_coding	Clic1	132.47	158.72	128.04	154.94	148.97	140.5	145.28	166.34	154.01
ENSMUSG00000007044.4	protein_coding	Ly6g6c	0	0	0	0	0	0	0	0	0.04
ENSMUSG00000007050.10	protein_coding	Lsm2	49.42	44.99	51.02	59.61	53.77	56.18	60.53	57.8	65.45
ENSMUSG00000007080.7	protein_coding	Pole	32.09	27.19	26.48	26.64	32.45	26.91	28.08	31.58	29.02
ENSMUSG00000007097.8	protein_coding	Atp1a2	0.06	0.03	0.77	0.08	0.04	0.23	0.03	0.05	0.42
ENSMUSG00000007107.5	protein_coding	Atp1a4	0	0	0.01	0	0.01	0.01	0	0	0
ENSMUSG00000007122.4	protein_coding	Casq1	0.17	0.11	0.18	0.03	0.06	0.26	0.18	0.18	0.24
ENSMUSG00000007207.4	protein_coding	Stx1a	3.72	3.45	3.82	3.73	5.83	5.24	4.15	4.77	5.83
ENSMUSG00000007209.3	protein_coding	Ceacam9	0	0	0	0	0	0	0	0	0
ENSMUSG00000007216.4	protein_coding	Zfp775	1.86	2.45	1.76	1.56	1.75	1.75	1.75	2.26	2.18
ENSMUSG00000007279.7	protein_coding	Scube2	0.01	0.03	0.09	0.07	0.03	0.05	0.02	0.02	0.08
ENSMUSG00000007338.8	protein_coding	Mrpl49	46.23	32.86	50.09	43.64	39.41	47.73	44.57	42.9	47.76
ENSMUSG00000007379.8	protein_coding	Dennd2c	4.56	2.42	4.66	5.21	3.98	6.93	5.18	3.9	6.34
ENSMUSG00000007411.8	protein_coding	Mark3	26.72	27.48	28.96	25.02	26.42	28.04	25.68	29.2	30.46
ENSMUSG00000007415.9	protein_coding	Gatad1	37.44	34.99	38.9	36.78	34.69	39.98	38.28	39.51	42.29
ENSMUSG00000007440.7	protein_coding	Pcdha11	0.13	0.05	0.13	0.54	0.47	0.88	0.29	0.19	0.56
ENSMUSG00000007457.3	protein_coding	2310003L06Rik	0	0	0	0	0	0	0	0	0
ENSMUSG00000007458.8	protein_coding	M6pr	68.81	61.41	70.82	72.14	71.64	74.93	76.26	75.45	77.21
ENSMUSG00000007476.11	protein_coding	Lrrc8a	19.26	18.91	20.62	17.45	20.75	19.22	18.92	18.58	18.35
ENSMUSG00000007480.2	protein_coding	Mc5r	0.03	0	0.2	0	0	0.09	0.03	0.03	0.03
ENSMUSG00000007564.8	protein_coding	Ppp2r1a	84.77	70.98	88.72	96.25	77.83	92.31	99.47	87.9	107
ENSMUSG00000007570.8	protein_coding	Fance	17.76	16.13	18.62	21.88	20.73	22	20.86	19.39	20.91
ENSMUSG00000007589.7	protein_coding	Tinf2	15.38	20.04	17.52	16.42	21.53	18.44	17.64	23.57	21.65
ENSMUSG00000007591.7	protein_coding	Tssk4	0.66	0.5	0.68	0.48	0.55	0.51	0.65	0.62	0.38
ENSMUSG00000007594.9	protein_coding	Hapln4	0.37	1.91	0.34	0.55	1.62	0.81	0.76	1.47	0.93
ENSMUSG00000007603.8	protein_coding	Dus3l	8.04	7.06	7.67	9.53	9.97	10.29	10.68	9.19	11.56
ENSMUSG00000007610.8	protein_coding	Gtpbp3	17.98	19.46	18.04	14	18.28	17.37	15.95	18.53	17.37
ENSMUSG00000007613.9	protein_coding	Tgfbr1	27.37	44.97	20.05	15.79	26.61	14.59	22.19	33.52	13.48
ENSMUSG00000007617.10	protein_coding	Homer1	5.63	8.78	5.5	5.13	7.55	4.79	5.38	8.08	5.58
ENSMUSG00000007646.7	protein_coding	Rad51c	7.51	5.68	9.59	8.58	8.03	11.68	8.3	7.55	10.84
ENSMUSG00000007653.5	protein_coding	Gabrb2	0	0.01	0	0.01	0	0.01	0	0	0
ENSMUSG00000007655.9	protein_coding	Cav1	59.85	11.26	40.71	68.78	31.84	41.04	82.65	33	52.28
ENSMUSG00000007656.7	protein_coding	Arpp19	101	98.61	98.88	105.67	105.82	97.36	105.38	118.69	110.04
ENSMUSG00000007659.11	protein_coding	Bcl2l1	27.05	24.96	26.2	29.83	32.21	32.31	35.17	29.17	37.5
ENSMUSG00000007670.8	protein_coding	Khsrp	38.81	31.41	34.59	32.24	35.84	34.87	37.65	37.19	39.3
ENSMUSG00000007682.5	protein_coding	Dio2	0.04	0.02	0.05	0.03	0.06	0.06	0.03	0.09	0.1
ENSMUSG00000007721.5	protein_coding	Ccdc124	38.92	34.74	43.09	36.66	27.88	38.66	37.55	32.14	43.2
ENSMUSG00000007739.4	protein_coding	Cct4	61.68	68.15	63.2	91.06	85.8	89.86	100.41	99.88	115.49
ENSMUSG00000007777.3	protein_coding	0610009B22Rik	13	10.82	15.98	15.59	15.27	21.04	14.88	16.34	19.83
ENSMUSG00000007783.8	protein_coding	Cpt1c	12.78	7.99	14.56	14.23	12.29	18.93	12.8	11.36	17.62
ENSMUSG00000007805.3	protein_coding	Twist2	42.48	52.16	55.78	30.61	43.4	44.19	39.23	42.07	42.33
ENSMUSG00000007812.9	protein_coding	Zfp655	22.89	22.26	20.66	18.35	23.27	18.54	19.15	22.91	19.23
ENSMUSG00000007815.8	protein_coding	Rhoa	106.15	99.3	111.67	100.05	96.65	100.14	110.59	111.78	115.99
ENSMUSG00000007817.8	protein_coding	Zmiz1	8.12	5.01	6.04	4.41	5.55	5.73	4.98	7.12	6.15
ENSMUSG00000007827.8	protein_coding	Ankrd26	5.08	5.2	5.31	4.45	5.35	4.76	4.69	5.07	4.96
ENSMUSG00000007833.7	protein_coding	Aldh16a1	31.77	23.84	25.62	26.79	29.28	27.28	31.12	28.22	30.21
ENSMUSG00000007836.6	protein_coding	Hnrnpa0	34.02	29.85	34.77	30.16	31.74	34.27	35.94	33.6	36.38
ENSMUSG00000007837.4	protein_coding	Prrg2	6.88	4.27	9.92	10.17	8.23	13.8	11.2	7.93	12.4
ENSMUSG00000007850.10	protein_coding	Hnrnph1	146.13	124.53	175.31	172.79	180.17	178.86	173.67	187.48	213.08
ENSMUSG00000007867.7	protein_coding	1700019E19Rik	21.59	16.27	20.05	20.25	15.89	16.81	15.92	14.64	18.83
ENSMUSG00000007872.3	protein_coding	Id3	93.58	15.74	72.87	139.44	22.14	140.67	104.28	29.09	125.71
ENSMUSG00000007877.2	protein_coding	Tcap	0.1	0.06	0.16	0.09	0.18	0.06	0.11	0.13	0.21
ENSMUSG00000007880.9	protein_coding	Arid1a	10.17	7.47	8.11	6.45	8.94	8.27	8.1	10.34	10.26
ENSMUSG00000007888.9	protein_coding	Crlf1	31.88	32.17	23.01	22.19	7.51	14.88	17.4	12.79	4.34
ENSMUSG00000007891.8	protein_coding	Ctsd	436.25	318.2	458.99	385.59	486.5	416.32	354.5	386.45	379.83
ENSMUSG00000007892.7	protein_coding	Rplp1	1671.41	1957.15	1354.23	1980.38	1694.44	1542.92	2031.71	1813.95	1849.95
ENSMUSG00000007907.3	protein_coding	4931407G18Rik	0	0	0	0	0	0	0	0	0
ENSMUSG00000007908.7	protein_coding	Hmgcll1	0.01	0.01	0.03	0	0	0.01	0.02	0.01	0.02
ENSMUSG00000007944.7	protein_coding	Ttc9b	0.07	0	0.1	0	0.03	0.03	0.04	0	0
ENSMUSG00000007946.8	protein_coding	Phox2a	0.03	0.09	0.07	0	0.04	0.09	0.04	0.12	0.04
ENSMUSG00000007950.8	protein_coding	Abhd8	30.04	20.46	34.77	22.83	19.94	30.57	24.05	22.98	31.4
ENSMUSG00000007987.8	protein_coding	Rabl5	19.03	13.77	18.97	19.8	17.38	19.2	16.98	15.88	18.85
ENSMUSG00000007989.5	protein_coding	Fzd3	3.72	2.59	3.44	3.46	3.99	4.23	3.85	3.82	3.7
ENSMUSG00000008028.8	protein_coding	1700008O03Rik	0.05	0.23	0.13	0	0.06	0.03	0.09	0.05	0.08
ENSMUSG00000008035.6	protein_coding	Mid1ip1	33.92	57.97	31.23	26.65	43.36	18.24	25.56	38.12	23.97
ENSMUSG00000008036.9	protein_coding	Ap2s1	84.26	79.15	92.65	95.26	86.66	101.57	98.63	99.73	113.62
ENSMUSG00000008090.8	protein_coding	Fgfrl1	9.46	6.68	10.91	8.04	5.5	11.55	7.07	6.59	11.6
ENSMUSG00000008129.8	protein_coding	4930432K21Rik	1.95	1.15	1.87	1.75	1.63	2.34	1.7	1.48	1.74
ENSMUSG00000008136.8	protein_coding	Fhl2	80.22	16.76	101.25	87.59	48.26	105.7	94.37	44.58	80.97
ENSMUSG00000008140.10	protein_coding	2310044H10Rik	44.68	40.1	42.98	45.33	39.61	44.73	41	40.69	47.49
ENSMUSG00000008153.5	protein_coding	Clstn3	0.34	0.42	0.36	0.13	0.48	0.3	0.2	0.49	0.48
ENSMUSG00000008167.8	protein_coding	Fbxw9	5.3	4.15	7.04	6.11	6	8.61	5.8	5.41	8.66
ENSMUSG00000008193.6	protein_coding	Spib	3.34	0.42	2.76	2.55	2.58	2.78	2.82	2.44	5.96
ENSMUSG00000008200.7	protein_coding	Fnbp4	30.19	28.7	30.2	23.64	39.86	25.55	29.43	34.03	29.81
ENSMUSG00000008206.7	protein_coding	Lass4	3.37	4.25	3.55	3.09	4.04	3.1	3.45	5.06	4.39
ENSMUSG00000008226.8	protein_coding	Scrn3	6.24	4.46	10.56	6.83	6.33	8.61	8.3	6.31	7.67
ENSMUSG00000008301.5	protein_coding	Phax	22.7	20.49	26.75	26.1	23.33	28.6	28.6	26.75	29.36
ENSMUSG00000008305.11	protein_coding	Tle1	18.4	12.83	14.34	23.83	23.86	29.09	24.38	20.93	26.41
ENSMUSG00000008307.5	protein_coding	1700109H08Rik	1.31	1.42	0.81	0.42	1.16	0.8	1.23	0.63	0.5
ENSMUSG00000008318.3	protein_coding	Relt	3.37	3.26	4.15	3.95	3.53	5.09	4.2	4.06	3.72
ENSMUSG00000008333.6	protein_coding	Snrpb2	25.4	26.87	28.33	27.37	25.78	27.93	26.59	32.94	31.09
ENSMUSG00000008348.8	protein_coding	Ubc	700.53	632.1	718.91	669.9	698.22	772.44	688.73	630.04	718.67
ENSMUSG00000008373.9	protein_coding	Prpf31	25.33	27.14	25.15	28.74	32.66	31.01	34.4	34.51	37.56
ENSMUSG00000008384.8	protein_coding	Sertad1	31.41	25.5	24.24	38.47	29.73	31.98	34.85	34.13	31.99
ENSMUSG00000008393.8	protein_coding	Carhsp1	61.14	50.53	60.28	55.36	50.99	60.9	54.29	54.95	61.54
ENSMUSG00000008398.7	protein_coding	Elk3	24.69	31.12	25.91	22.23	26.6	28.29	27.07	33.23	27.25
ENSMUSG00000008429.7	protein_coding	Herpud2	7.02	4.9	7.44	6.41	6.15	5.85	6.2	5.53	6.6
ENSMUSG00000008435.9	protein_coding	Rdh13	6.03	7.39	6.89	7.71	8.02	8.6	9.05	6.9	8.21
ENSMUSG00000008438.3	protein_coding	Adam21	0.14	0.1	0.11	0.1	0.1	0.1	0.1	0.13	0.12
ENSMUSG00000008450.7	protein_coding	Nutf2	17.46	19.66	16.3	16.14	16.66	18.33	17.79	19.3	20.6
ENSMUSG00000008461.5	protein_coding	Fut1	0.03	0.27	0.03	0.02	0.07	0.02	0.01	0.05	0
ENSMUSG00000008475.7	protein_coding	Arpc5	53.57	45.79	56.12	51.43	47.17	46.57	53.73	54.01	60.58
ENSMUSG00000008482.8	protein_coding	Rnf151	0.13	0.25	0.24	0.17	0.27	0.21	0.31	0.18	0.19
ENSMUSG00000008489.10	protein_coding	Elavl2	0.03	0.03	0.08	3.53	1.43	4.3	3.36	1.02	3.29
ENSMUSG00000008496.9	protein_coding	Pou2f2	0	0.03	0.11	0	0.02	0.16	0	0.13	0.18
ENSMUSG00000008540.5	protein_coding	Mgst1	87.47	43.87	59.25	114.94	95.07	70.59	78.48	90.88	109.41
ENSMUSG00000008575.10	protein_coding	Nfib	20.69	12.71	20.65	12.41	13.95	17.43	13.89	15.13	20.17
ENSMUSG00000008590.4	protein_coding	Htr3b	0	0	0	0	0	0	0	0	0
ENSMUSG00000008601.6	protein_coding	Rab25	0.17	0.24	0.16	0.03	0.26	0.16	0.22	0.26	0.18
ENSMUSG00000008604.6	protein_coding	Ubqln4	24.54	27.25	20.48	23.18	28.95	24.19	26.15	27.32	25.05
ENSMUSG00000008658.8	protein_coding	Rbfox1	0.4	0.29	0.24	0.08	0.15	0.04	0.02	0.09	0.09
ENSMUSG00000008668.7	protein_coding	Rps18	880.08	1289.57	756.55	1145.42	1197.93	948.72	1236.59	1276.35	1168.75
ENSMUSG00000008682.7	protein_coding	Rpl10	1078.73	1370.57	943.16	1288.12	1026.41	1008.61	1268.93	1057.7	1203.62
ENSMUSG00000008683.10	protein_coding	Rps15a	413.34	619.59	403.63	594.58	552.19	533.06	645.29	637.01	650.18
ENSMUSG00000008686.8	protein_coding	Zfp955a	7.69	6.12	9.04	8.55	9.18	9.98	9.6	9.25	9.38
ENSMUSG00000008690.9	protein_coding	Ncaph2	91.77	83.03	95.36	103.47	101.79	105.03	102.37	105.39	107.73
ENSMUSG00000008730.10	protein_coding	Hipk1	29.13	31.5	25.01	20.14	27.26	23.56	22.97	29.7	22.91
ENSMUSG00000008734.8	protein_coding	Gprc5b	7.15	3.92	10.14	7.13	5.5	13.56	7.43	7.48	15.03
ENSMUSG00000008763.8	protein_coding	Man1a2	37.38	26.05	42.13	31.76	35.51	35.59	37.97	37.75	40.01
ENSMUSG00000008789.8	protein_coding	Ceacam5	0	0	0	0	0	0	0	0	0
ENSMUSG00000008813.5	protein_coding	Tppp2	0	0	0	0	0	0	0	0	0
ENSMUSG00000008822.9	protein_coding	Acyp1	10.89	8.79	13.72	11.6	9.65	13.78	8.13	9.65	12.12
ENSMUSG00000008843.4	protein_coding	Cldn13	0	0.03	0	0	0	0	0	0	0
ENSMUSG00000008845.3	protein_coding	Cd163	0	0	0	0	0	0	0	0.01	0
ENSMUSG00000008855.10	protein_coding	Hdac5	43.8	36.75	46.35	37.97	51.61	53.75	41.17	51.34	44.66
ENSMUSG00000008859.7	protein_coding	Rala	13.3	12.58	15.47	14.68	14.6	15.1	16.48	17.14	17.37
ENSMUSG00000008874.3	protein_coding	Clec3a	0	0	0	0	0	0	0	0	0
ENSMUSG00000008892.4	protein_coding	Vdac3	105.67	136.96	104.33	106.65	103.59	99.27	115	112.67	117.22
ENSMUSG00000008932.7	protein_coding	Slc1a7	0.03	0.1	0.02	0.03	0.06	0.01	0.02	0.04	0
ENSMUSG00000008958.8	protein_coding	Vps72	31.57	24.52	30.03	31.54	33.81	34.53	32.9	30.36	34.83
ENSMUSG00000008976.9	protein_coding	Gabpa	31.83	27.49	31.67	24.43	26.69	26.62	26.51	26.72	27.85
ENSMUSG00000008999.7	protein_coding	Bmp7	0	0.01	0	0	0	0	0	0	0
ENSMUSG00000009013.4	protein_coding	Dynll1	194.85	159.49	196.65	202.42	154.58	195.9	201.64	197.81	222.21
ENSMUSG00000009030.8	protein_coding	Pdcl	13.85	11.12	16.42	13.63	12.95	16.21	13.52	12.84	15.76
ENSMUSG00000009035.6	protein_coding	Tmem184b	22.68	19.32	22.02	20.36	20.6	23.59	23.88	21.87	25.52
ENSMUSG00000009047.3	protein_coding	Gm5965	0	0	0	0	0	0	0	0	0
ENSMUSG00000009070.7	protein_coding	Rtdr1	0	0	0	0	0	0.02	0.07	0	0
ENSMUSG00000009073.9	protein_coding	Nf2	17.47	14.74	17.76	17.32	17.62	20.27	18.88	19.1	24.21
ENSMUSG00000009075.2	protein_coding	Cabp7	0.05	0.05	0.06	0.01	0.08	0.09	0.14	0.05	0.14
ENSMUSG00000009076.4	protein_coding	Zmat5	8.96	5.64	9.09	11.97	8.42	12.33	11.81	10.74	13.63
ENSMUSG00000009079.10	protein_coding	Ewsr1	151.99	143.89	155.29	151.38	191.29	167.97	168.54	186.38	210.51
ENSMUSG00000009090.10	protein_coding	Ap1b1	19.16	13.1	19.84	19.83	20.73	23.75	23.77	20.62	23.09
ENSMUSG00000009092.4	protein_coding	Derl3	0.34	0.16	0.36	0.25	0.34	0.16	0.32	0.35	0.39
ENSMUSG00000009093.7	protein_coding	Gstt4	0.07	0.12	0.03	0	0.15	0.03	0.04	0.1	0.04
ENSMUSG00000009097.8	protein_coding	Tbx1	0	0.03	0	0	0.01	0	0	0	0
ENSMUSG00000009108.9	protein_coding	Gnat2	0.46	0.73	0.3	0.28	0.61	0.73	0.71	0.49	1
ENSMUSG00000009112.2	protein_coding	Bcl2l13	10.37	8.36	10.66	8.59	9.25	10.39	9.97	10.69	11.06
ENSMUSG00000009114.10	protein_coding	2610028H24Rik	0	0	0	0	0	0	0	0	0
ENSMUSG00000009115.5	protein_coding	1700027D21Rik	0.09	0.13	0.08	0.03	0	0.05	0	0.06	0.04
ENSMUSG00000009145.4	protein_coding	Dqx1	0.26	0.74	0.28	0.18	0.33	0.26	0.15	0.19	0.23
ENSMUSG00000009185.2	protein_coding	Ccl8	8.05	52.47	3.69	1.65	11.08	0.2	2.68	9.51	0.56
ENSMUSG00000009207.9	protein_coding	Lnp	15.54	15.88	17.52	16.67	18.28	15.89	19.03	18.54	17.41
ENSMUSG00000009210.4	protein_coding	2310007L24Rik	0	0.02	0	0	0	0	0	0	0
ENSMUSG00000009214.3	protein_coding	Tmem8c	0	0	0	0	0	0	0	0	0
ENSMUSG00000009216.7	protein_coding	Fam163b	0	0.02	0	0.01	0	0	0	0	0
ENSMUSG00000009246.7	protein_coding	Trpm5	0.6	0.56	0.71	0.82	0.28	0.54	0.36	0.34	0.87
ENSMUSG00000009248.5	protein_coding	Ascl2	0	0.02	0	0	0.02	0.03	0.02	0.04	0
ENSMUSG00000009281.4	protein_coding	Rarres2	7.53	170.29	5.72	3.22	18.16	4.3	4.08	62.42	8.76
ENSMUSG00000009291.6	protein_coding	Pttg1ip	84.43	66.33	98.4	94.59	88.38	117.52	95.39	93.31	125.13
ENSMUSG00000009292.9	protein_coding	Trpm2	0.01	0.02	0.01	0.01	0.05	0.03	0.01	0.15	0.01
ENSMUSG00000009293.10	protein_coding	Ube2g2	16.35	16.38	21.45	19.01	20.41	24.06	24.05	19.21	27.11
ENSMUSG00000009350.7	protein_coding	Mpo	0	0.12	0.21	0	0.15	0.15	0	0.06	0
ENSMUSG00000009356.6	protein_coding	Lpo	0	0	0	0	0	0	0	0	0
ENSMUSG00000009376.8	protein_coding	Met	9.16	3.46	6.83	11.72	6.29	10.56	17.94	12.32	16.81
ENSMUSG00000009378.3	protein_coding	Slc16a12	0.01	0.02	0.02	0.01	0.04	0.01	0.01	0.03	0.03
ENSMUSG00000009394.6	protein_coding	Syn2	0.03	0.01	0.02	0.01	0.01	0.02	0.02	0.02	0.04
ENSMUSG00000009406.7	protein_coding	Elk1	14.15	11.81	14.24	11.81	12.59	11.49	11.62	11.9	11.78
ENSMUSG00000009418.8	protein_coding	Nav1	4.41	2.88	3.47	1.99	2.62	2.52	2.42	3.95	2.68
ENSMUSG00000009470.9	protein_coding	Tnpo1	38.84	38.49	38.26	36	42.49	37.86	46.38	49.94	44.98
ENSMUSG00000009471.3	protein_coding	Myod1	0	0	0	0.01	0.01	0	0	0.02	0
ENSMUSG00000009487.8	protein_coding	Otog	0.01	0	0	0	0	0	0	0	0
ENSMUSG00000009535.7	protein_coding	Rnmt	16.12	24.01	18.75	17.94	25.07	20.8	21.07	27.14	23
ENSMUSG00000009545.7	protein_coding	Kcnq1	0.03	0	0	0	0	0.01	0	0.01	0.01
ENSMUSG00000009549.8	protein_coding	Srp14	77.84	61.73	92.12	87.28	73.92	92.84	77.45	80.29	88.28
ENSMUSG00000009551.2	protein_coding	6330409D20Rik	0.25	0.07	0.34	0.21	0.2	0.25	0.24	0.19	0.33
ENSMUSG00000009555.10	protein_coding	Cdk9	22.53	23.81	23.31	19.26	25.24	21.66	22.33	24.92	26.24
ENSMUSG00000009563.8	protein_coding	Tor2a	19.37	21.48	21.57	20.25	21.26	20.9	20.09	21.79	22.66
ENSMUSG00000009566.6	protein_coding	Fpgs	8.77	10.57	8.45	9.19	10.97	10.07	11.18	10.99	11.44
ENSMUSG00000009569.8	protein_coding	Mkl2	7.75	5.3	5.67	4.29	5.27	5.17	4.81	5.42	5.3
ENSMUSG00000009575.8	protein_coding	Cbx5	84.72	66.48	97.12	83.65	90	95.59	100.36	100.83	104.2
ENSMUSG00000009580.7	protein_coding	Odam	0	0	0	0	0	0	0	0	0
ENSMUSG00000009585.9	protein_coding	Apobec3	5.62	3.65	4.62	3.78	5.11	4.08	3.07	5.29	3.43
ENSMUSG00000009588.8	protein_coding	St6galnac1	0	0	0	0	0	0	0	0	0
ENSMUSG00000009596.3	protein_coding	Taf7l	0	0.54	0	0	0.4	0.02	0.03	0.01	0
ENSMUSG00000009614.10	protein_coding	Sardh	12.89	8.84	16.68	13.33	12.41	16.15	12.54	9.46	16.02
ENSMUSG00000009621.10	protein_coding	Vav2	6.7	5.13	7.41	6.91	7.24	7.48	7.68	7.72	8.17
ENSMUSG00000009628.8	protein_coding	Tex15	4.11	2.73	3.92	2.08	2.71	2.91	1.78	2.03	2.81
ENSMUSG00000009630.9	protein_coding	Ppp2cb	38.74	33.59	40.02	37.35	35.07	43.18	41.43	38.65	49.02
ENSMUSG00000009633.2	protein_coding	G0s2	9.1	5.19	24.38	3.75	1.4	10.28	1.16	0.45	3.96
ENSMUSG00000009640.5	protein_coding	Dmap1	21.31	16.56	22.73	20.97	21.09	24.77	22.26	22.02	24.95
ENSMUSG00000009646.7	protein_coding	Pla2g12b	0.04	0.07	0	0	0	0	0	0	0.1
ENSMUSG00000009647.7	protein_coding	Ccdc109a	12.35	8.46	10.91	10.53	10.32	11.91	11.76	9.41	12.29
ENSMUSG00000009654.4	protein_coding	Oit3	0.2	0.09	0.07	0.2	0.22	0.08	0.1	0.32	0.14
ENSMUSG00000009670.5	protein_coding	Tex11	0	0.01	0.04	0	0.02	0.02	0.01	0.01	0
ENSMUSG00000009681.8	protein_coding	Bcr	9.4	5.93	9.19	7.8	7.21	9.42	8.15	7.97	10.26
ENSMUSG00000009687.8	protein_coding	Fxyd5	23.47	36.8	11.76	10.17	16.32	5.69	8.68	17.07	7.66
ENSMUSG00000009731.4	protein_coding	Kcnd1	1.02	0.83	1.14	0.88	1.08	1.13	1.18	1.41	1.05
ENSMUSG00000009733.7	protein_coding	Tcfcp2	7.7	5.61	7.53	7.36	7.23	8.74	7.32	7.34	7.87
ENSMUSG00000009734.9	protein_coding	Pou6f2	0	0	0	0	0	0	0	0	0
ENSMUSG00000009739.8	protein_coding	Pou6f1	5.52	4.23	5.52	3.26	3.13	3.93	3.2	3.75	3.44
ENSMUSG00000009741.8	protein_coding	Ubp1	21.45	17.46	20.94	17.8	19.82	17.68	17.93	18.79	20.28
ENSMUSG00000009772.9	protein_coding	Nuak2	5.59	1.92	3.84	5.32	2.74	4.09	5.12	3.13	5.49
ENSMUSG00000009828.9	protein_coding	Ick	9.5	7.73	11.16	8.17	7.69	7.85	8.09	6.78	8.28
ENSMUSG00000009863.8	protein_coding	Sdhb	66.15	56.9	72.41	72.21	63.18	73.28	76.01	71.99	80.01
ENSMUSG00000009876.7	protein_coding	Cox4i2	1.66	4.14	1.57	1.62	3.32	3.68	1.6	3.37	1.55
ENSMUSG00000009894.9	protein_coding	Snap47	21.71	16.29	27.03	28.87	24.24	41.31	29.91	27.51	43.77
ENSMUSG00000009900.7	protein_coding	Wnt3a	0	0	0	0	0	0	0	0	0
ENSMUSG00000009905.4	protein_coding	Kdsr	7.5	7.53	6.66	6.18	7.57	6.95	6.56	6.94	6.8
ENSMUSG00000009907.10	protein_coding	Vps4b	33.36	31.43	30.95	29.77	30.77	25.77	28.47	32	27.3
ENSMUSG00000009927.8	protein_coding	Rps25	351.71	511.47	330.19	441.65	389.71	369.76	440.68	462.84	455.43
ENSMUSG00000009941.4	protein_coding	Nxf2	0.24	0.15	0.11	0.14	0.13	0.07	0.2	0.2	0.09
ENSMUSG00000009995.10	protein_coding	Taz	20.46	16.7	23.08	19.35	19.18	20.49	17.65	14.39	25.47
ENSMUSG00000010021.7	protein_coding	Kif19a	0.16	0.08	0.22	0.11	0.08	0.33	0.27	0.08	0.21
ENSMUSG00000010025.11	protein_coding	Aldh3a2	21.9	18.89	19.89	22.39	25.67	24.86	24.26	27.01	27.6
ENSMUSG00000010044.6	protein_coding	Zmynd10	0.3	0.12	0.25	0.14	0.23	0.16	0.22	0.11	0.16
ENSMUSG00000010045.1	protein_coding	Tmem115	20.35	19.54	20.87	20.26	19.22	19.47	20.16	18.65	19.89
ENSMUSG00000010047.7	protein_coding	Hyal2	17.34	11.65	18.66	19.21	13.64	19.81	18.66	16.98	19.8
ENSMUSG00000010048.5	protein_coding	Ifrd2	13.79	20.67	13.15	13.64	17.86	12.8	17.34	16.55	15.01
ENSMUSG00000010051.7	protein_coding	Hyal1	3.62	1.88	5.47	3.86	2.66	6.09	2.74	2.44	5.62
ENSMUSG00000010054.3	protein_coding	Tusc2	12.39	8.52	13.38	13.08	11.77	13.52	11.47	11.16	14.47
ENSMUSG00000010057.3	protein_coding	Nprl2	11.48	9.04	14.04	12.42	11.36	14.48	12.17	11.92	13.62
ENSMUSG00000010064.8	protein_coding	Slc38a3	0.39	0.19	0.24	0.28	0.25	0.35	0.29	0.29	0.19
ENSMUSG00000010066.8	protein_coding	Cacna2d2	0.01	0.01	0.01	0	0	0	0.02	0.01	0.02
ENSMUSG00000010067.7	protein_coding	Rassf1	42.54	39.49	38.6	38.48	39.9	35.67	40.76	39.89	40.6
ENSMUSG00000010080.8	protein_coding	Epn3	0.05	0.03	0.04	0.04	0.02	0.04	0	0.04	0.07
ENSMUSG00000010086.10	protein_coding	Rnf112	0.03	0.01	0.08	0	0	0.04	0.01	0	0.02
ENSMUSG00000010095.7	protein_coding	Slc3a2	52.75	136.09	53.43	44.86	86.57	36.82	48.61	51.56	42.45
ENSMUSG00000010097.6	protein_coding	Nxf1	41.44	41.33	46.44	40.92	41.57	46.11	43.56	46.5	51.66
ENSMUSG00000010110.9	protein_coding	Stx5a	40.15	43.38	45.93	34.68	38.11	42.54	34.79	35.84	42.08
ENSMUSG00000010122.7	protein_coding	Slc47a1	0	0.05	0.04	0	0.01	0.09	0.01	0.01	0.02
ENSMUSG00000010136.7	protein_coding	1700027A23Rik	0	0	0	0	0	0	0	0	0
ENSMUSG00000010142.6	protein_coding	Tnfrsf13b	0.02	0.03	0	0.1	0	0	0	0.05	0.01
ENSMUSG00000010154.6	protein_coding	Spire2	2.23	2.25	1.86	1.76	1.66	2.16	2.66	2.23	2.36
ENSMUSG00000010175.6	protein_coding	Prox1	0.01	0	0.01	0.01	0.01	0.02	0.01	0.03	0.02
ENSMUSG00000010205.9	protein_coding	Raver1	27.04	23.98	24.83	20.61	23.76	21.72	23.08	26.25	23.52
ENSMUSG00000010277.7	protein_coding	2610507B11Rik	45.01	35.55	40.33	40.54	54.13	44.43	51.79	55.04	46.88
ENSMUSG00000010290.7	protein_coding	AI597479	7.34	6.75	9.2	6.98	5.88	8.34	7.14	7.32	9.11
ENSMUSG00000010307.5	protein_coding	Tmem86a	6.95	5.5	9.04	5.74	7.18	6.86	6.5	8.27	5.99
ENSMUSG00000010311.8	protein_coding	Optc	0.24	0.1	0.35	0.16	0.27	0.29	0.27	0.22	0.2
ENSMUSG00000010342.9	protein_coding	Tex14	0.29	0.21	0.38	0.17	0.22	0.2	0.17	0.06	0.09
ENSMUSG00000010358.7	protein_coding	Ifi35	43.49	57.14	18.79	37.71	96.84	25.34	39.71	70.24	25.48
ENSMUSG00000010362.3	protein_coding	Rdm1	13.12	10.47	17.81	15.24	11.26	15.35	12.18	10.1	15.12
ENSMUSG00000010376.8	protein_coding	Nedd8	101.88	105.3	115.92	123.4	118.51	127.77	127.18	138.27	150.79
ENSMUSG00000010392.8	protein_coding	Gosr1	14.51	16.77	20.49	17.29	23.2	22.56	19.02	20.13	25.79
ENSMUSG00000010406.7	protein_coding	Mrpl52	43.14	63.48	47.59	47.87	53.33	47.71	55.98	58.22	51.16
ENSMUSG00000010435.6	protein_coding	Spaca7	0	0	0	0	0	0	0	0	0
ENSMUSG00000010453.5	protein_coding	4632411B12Rik	14.71	13.83	14.34	11.97	14.01	12.43	11.83	11.97	12.04
ENSMUSG00000010461.7	protein_coding	Eya4	2.23	0.7	1.37	2.25	0.78	1.38	1.61	0.65	1.14
ENSMUSG00000010476.6	protein_coding	Ebf3	0.03	0.01	0.03	0.02	0.01	0.06	0.01	0.01	0.06
ENSMUSG00000010492.10	processed_transcript	Gm16119	2.16	1.19	1.73	1.52	1.68	1.8	1.81	1.46	1.79
ENSMUSG00000010505.7	protein_coding	Myt1	0	0.01	0	0	0	0	0	0	0
ENSMUSG00000010517.7	protein_coding	Faf1	19.21	18.39	19.24	19.02	18.82	20.51	19.01	18.11	21.32
ENSMUSG00000010529.5	protein_coding	Gm266	0	0.16	0.02	0	0.13	0.04	0.03	0.07	0.12
ENSMUSG00000010538.7	protein_coding	1700021C14Rik	1.51	2.4	1.57	2.9	3.06	2.72	2.49	2.28	2.59
ENSMUSG00000010554.7	protein_coding	Mettl16	14.95	15.17	14.8	18.04	21.48	20.76	21.14	21.74	22.07
ENSMUSG00000010592.7	protein_coding	Dazl	0	0	0.01	0	0	0.01	0	0	0
ENSMUSG00000010601.5	protein_coding	Apol7a	0.27	0.37	0.24	0.2	0.45	0.22	0.19	0.32	0.21
ENSMUSG00000010607.7	protein_coding	Pigyl	13.14	6.23	13.33	11.99	9.12	13.24	9.86	8.74	11.98
ENSMUSG00000010608.8	protein_coding	Rbm25	23.16	23.43	22.31	18.63	24.61	18.54	21.54	22.2	19.96
ENSMUSG00000010609.9	protein_coding	Psen2	3.54	3.69	4.86	3.99	3.47	4.62	4.18	3.5	5.75
ENSMUSG00000010651.4	protein_coding	Acaa1b	0.89	0.02	0.38	0.81	0.04	0.6	0.43	0.04	0.42
ENSMUSG00000010660.2	protein_coding	Plcd1	6.7	3.91	7.14	5.2	3.24	6.21	4.38	3.32	5.66
ENSMUSG00000010663.4	protein_coding	Fads1	65.37	93.56	80.55	63.19	94.72	76.95	70.77	92.85	84.73
ENSMUSG00000010721.8	protein_coding	Lmbr1	3.34	2.83	3.32	2.55	2.57	2.57	2.18	2.3	2.69
ENSMUSG00000010751.8	protein_coding	Tnfrsf22	3.11	3.37	2.21	1.43	2.82	1.23	1.79	2.66	0.78
ENSMUSG00000010755.9	protein_coding	Cars	27.34	58.22	27.64	25.91	55.62	28.08	35.33	47.53	34.74
ENSMUSG00000010760.4	protein_coding	Phlda2	0	0.08	0	0.04	0	0	0.05	0.09	0
ENSMUSG00000010796.5	protein_coding	Asz1	0	0	0	0	0	0	0	0	0
ENSMUSG00000010797.2	protein_coding	Wnt2	0.39	0	0.02	0.22	0.02	0.03	0.26	0.05	0.04
ENSMUSG00000010803.6	protein_coding	Gabra1	0	0	0	0.01	0	0.01	0	0	0
ENSMUSG00000010825.11	protein_coding	Grid2ip	0.09	0.02	0.01	0.05	0.02	0.04	0.06	0.01	0.06
ENSMUSG00000010830.7	protein_coding	Kdelr3	55.13	81.29	65.7	63.23	68.03	62.4	61.35	66.61	60.52
ENSMUSG00000010841.6	protein_coding	1700006E09Rik	0	0	0	0	0	0	0	0	0
ENSMUSG00000010911.6	protein_coding	Apip	12.58	10.14	16.02	16.41	13.03	16.06	14.25	13.9	17.14
ENSMUSG00000010914.4	protein_coding	Pdhx	11.1	10.75	11.8	11.42	12.17	12.44	10.9	12.54	15.83
ENSMUSG00000010936.9	protein_coding	Vac14	23.71	19.49	23.5	20.68	22.33	20.7	20.55	18.22	22.2
ENSMUSG00000011008.7	protein_coding	Mcoln2	3.12	3.8	0.3	1.93	2.78	0.17	2.17	3.61	0.19
ENSMUSG00000011034.3	protein_coding	Slc5a1	0	0	0	0	0	0	0	0	0
ENSMUSG00000011052.5	processed_transcript	1700049J03Rik	0	0.09	0	0	0	0	0.11	0.1	0
ENSMUSG00000011096.9	protein_coding	Akt1s1	38.47	32.6	38.87	34.27	41.05	42.34	40.17	34.72	42.07
ENSMUSG00000011114.10	protein_coding	Tbrg1	68.84	98.74	61.47	55.32	70.39	49.55	57.83	68.01	52.41
ENSMUSG00000011118.3	protein_coding	Panx3	0.03	0.06	0.02	0	0.01	0.01	0	0.01	0
ENSMUSG00000011148.6	protein_coding	Adssl1	1.96	1.51	2.42	1.53	1.35	1.64	1.09	0.9	0.78
ENSMUSG00000011154.9	protein_coding	1700026D08Rik	0.47	0.77	0.77	0.4	1.68	0.57	1.38	1.84	0.34
ENSMUSG00000011158.7	protein_coding	Brf1	12.82	9.62	11.62	10.46	9.75	11.24	11.29	10.29	10.97
ENSMUSG00000011171.4	protein_coding	Vipr2	0.2	0.25	0.23	0.08	0.48	0.15	0.15	0.21	0.16
ENSMUSG00000011179.6	protein_coding	Odc1	48.3	57.3	48.36	45.8	39.31	38.35	60.16	56.04	53.91
ENSMUSG00000011254.9	protein_coding	Thg1l	8.67	14.83	6.76	9.51	11.9	8.34	10.6	15.1	10.07
ENSMUSG00000011256.9	protein_coding	Adam19	7.44	9.78	7.84	7.16	9.74	9.96	9.43	12.72	13.08
ENSMUSG00000011257.10	protein_coding	Pabpc4	34.8	40.55	30.59	37.32	37.02	34.93	47.79	40.77	52.46
ENSMUSG00000011263.9	protein_coding	Exoc3l2	0.01	0	0	0.04	0	0.05	0.01	0	0.1
ENSMUSG00000011267.6	protein_coding	Zfp296	0.67	0.62	0.47	0.43	0.92	0.81	0.7	1.03	0.81
ENSMUSG00000011305.5	protein_coding	Plin5	0.24	0.06	0.09	0.08	0.1	0.16	0.13	0.11	0.2
ENSMUSG00000011306.6	protein_coding	Sugp1	13.56	9.77	13.06	13.75	11.9	13.8	13.27	12.39	13.98
ENSMUSG00000011349.5	protein_coding	Dmrtc2	0	0	0	0	0	0	0	0	0
ENSMUSG00000011350.9	processed_transcript	Gm5893	0	0	0	0	0	0.08	0	0	0
ENSMUSG00000011382.6	protein_coding	Dhdh	0.44	1.09	0.67	0.62	1.14	0.92	0.9	1.22	1.21
ENSMUSG00000011427.8	protein_coding	Zfp790	4.1	3.42	4.62	3.96	3.9	4.85	3.9	3.93	4.76
ENSMUSG00000011463.5	protein_coding	Cpb1	0.08	0	0.07	0.06	0	0.19	0.03	0.01	0.19
ENSMUSG00000011486.8	protein_coding	Slc25a41	0.03	0.07	0.02	0.07	0	0.09	0	0.02	0.06
ENSMUSG00000011589.8	protein_coding	Fsd1	1.67	1.3	2.16	3.19	4.68	5.97	3.57	4.68	5.66
ENSMUSG00000011632.6	protein_coding	2310033E01Rik	0	0	0.04	0	0	0	0	0	0
ENSMUSG00000011658.8	protein_coding	Fuz	5.44	3.01	5.91	5.14	5.43	7.16	5.01	5.13	7.23
ENSMUSG00000011751.10	protein_coding	Spnb4	0.05	0.05	0.13	0.08	0.04	0.09	0.08	0.08	0.13
ENSMUSG00000011752.6	protein_coding	Pgam1	165.52	287.19	163.47	174.02	194.75	183.63	221.86	344.29	226.53
ENSMUSG00000011831.9	protein_coding	Evi5	23.64	25.3	23.86	19.76	25.23	19.78	22.16	24.94	21.03
ENSMUSG00000011832.7	protein_coding	Evi5l	6.06	2.52	7.33	5.39	3.55	7.17	4.94	3.75	7.48
ENSMUSG00000011837.3	protein_coding	Snapc2	18.68	17.1	19.21	19.66	15.53	20.81	20.22	18.34	22.86
ENSMUSG00000011877.7	protein_coding	Git1	21.75	19.69	21.24	19.07	25.37	22.63	21.23	23.54	25.56
ENSMUSG00000011884.7	protein_coding	Gltp	19.94	13.12	20.01	16.93	13.22	17.17	16.85	15.71	17.39
ENSMUSG00000011958.11	protein_coding	Bnip2	72.96	75.2	75.85	72.46	68.89	66.44	71.56	79.56	66.47
ENSMUSG00000011960.6	protein_coding	Ccnt1	22.63	23.41	25.46	22.99	27.06	28.72	28.22	28.06	27.92
ENSMUSG00000012017.3	protein_coding	Scarf2	31.52	14.93	37.69	19.29	17.93	28.48	20.55	15.63	25.17
ENSMUSG00000012042.4	protein_coding	4930579F01Rik	0.02	0	0	0	0	0	0	0	0
ENSMUSG00000012076.6	protein_coding	Brms1l	18.05	16.59	19.58	17.67	19.65	17.92	17.61	17.91	19.46
ENSMUSG00000012114.9	protein_coding	Med15	16.55	11.65	14.45	11.9	13.07	13.95	12.99	14.48	13.73
ENSMUSG00000012117.7	protein_coding	Dhdds	17.99	18.03	19.85	19.91	20.92	21.36	20.45	19.73	21.42
ENSMUSG00000012123.9	protein_coding	Aim1l	0.38	0.08	0.1	0.01	0.09	0.31	0.08	0.06	0.07
ENSMUSG00000012126.10	protein_coding	Ubxn11	2.11	1.48	1.47	1.52	1.71	2.09	1.12	1.26	1.89
ENSMUSG00000012187.7	protein_coding	Mogat1	0.04	0.07	0	0	0	0.14	0.25	0.3	0.05
ENSMUSG00000012211.7	protein_coding	Tex22	0.28	0.13	0.04	0.04	0.19	0.17	0.16	0.09	0.06
ENSMUSG00000012282.2	protein_coding	Wnt8a	0	0	0	0	0.01	0	0	0	0.02
ENSMUSG00000012296.8	protein_coding	Tjap1	15.08	13.51	16.75	20.94	19.74	23.48	22.43	20.91	25.08
ENSMUSG00000012350.8	protein_coding	Ehf	0	0.29	0.02	0	0	0	0	0	0.02
ENSMUSG00000012396.5	protein_coding	Nanog	0.04	0.01	0.07	0.03	0.04	0.14	0.09	0.07	0.11
ENSMUSG00000012405.9	protein_coding	Rpl15	110.43	160.23	105.26	137.87	151.38	139.12	178.14	177.88	191.95
ENSMUSG00000012422.8	protein_coding	Tmem167	13.89	15.92	14.7	14.3	15.38	13.09	14.84	14.97	14.95
ENSMUSG00000012428.8	protein_coding	Steap4	18.86	45.25	97.83	3.26	17.4	17.45	4.45	29.5	43.53
ENSMUSG00000012429.7	protein_coding	2810021B07Rik	8.88	8.18	9.5	9.5	8.81	7.46	9.02	9.73	8.76
ENSMUSG00000012443.3	protein_coding	Kif11	43.85	39.64	48.44	33.8	34.19	31.47	33.22	39.78	35.69
ENSMUSG00000012483.4	protein_coding	Rpa3	35.86	36.22	33.56	37.14	39.38	32.83	35.94	42.83	33.01
ENSMUSG00000012519.8	protein_coding	Mlkl	25.23	40.96	17.79	18.75	40.38	14.71	23.99	34.19	18.87
ENSMUSG00000012520.7	protein_coding	Phox2b	0	0	0.02	0	0	0	0	0	0
ENSMUSG00000012535.8	protein_coding	Tnpo3	35.29	35.25	37.84	34.66	37.58	39.65	39.13	40.67	44.93
ENSMUSG00000012609.10	protein_coding	Ttll5	6.57	6.24	6.94	6.06	7.12	6.05	6.75	7.78	6.83
ENSMUSG00000012640.9	protein_coding	Zfp715	6.65	5.85	7.25	6.34	7.73	7.41	8.07	8.31	8.34
ENSMUSG00000012705.9	protein_coding	Retn	1.32	1.03	3.11	1.18	0.98	2.77	1.53	1.93	4.1
ENSMUSG00000012777.7	protein_coding	Acpt	0.04	0.12	0.07	0.02	0.03	0.05	0.04	0.04	0.02
ENSMUSG00000012819.8	protein_coding	Cdh23	1.03	0.92	0.71	0.59	1.32	0.63	1.08	1.5	0.79
ENSMUSG00000012848.8	protein_coding	Rps5	499.05	700.23	387.54	647.87	643.91	549.14	691.62	654.54	683.78
ENSMUSG00000012889.8	protein_coding	Podnl1	2.53	1.92	3.18	3.13	2.2	4.69	3.21	3.32	5.35
ENSMUSG00000013033.10	protein_coding	Lphn1	19.42	14.46	20.77	13.39	14.61	19.93	16.14	15.78	18.34
ENSMUSG00000013076.8	protein_coding	Amotl1	27.65	31.66	27.6	17.65	27.95	22.69	20.35	25.2	23.8
ENSMUSG00000013083.7	protein_coding	2200002J24Rik	0	0	0	0	0	0	0	0	0
ENSMUSG00000013089.8	protein_coding	Etv5	15.09	17.25	16.25	8.73	15.2	13.03	11.18	14.85	10.65
ENSMUSG00000013091.4	protein_coding	Tmem190	0	0.17	0.12	0.06	0	0	0	0	0
ENSMUSG00000013150.9	protein_coding	Gfod2	13.93	9.69	14.72	12.68	10.25	13.96	14.65	12.38	13.96
ENSMUSG00000013155.9	protein_coding	E130303B06Rik	18.38	24.75	18.39	14.83	18.72	15.39	14.56	18.18	16.25
ENSMUSG00000013158.4	protein_coding	4933405L10Rik	0.2	0.07	0.26	0.1	0.12	0.25	0.09	0.05	0.27
ENSMUSG00000013160.7	protein_coding	Atp6v0d1	74.97	45.35	82	72.8	53.6	70.55	66.8	48.75	74.48
ENSMUSG00000013236.9	protein_coding	Ptprs	47.05	29.59	50.15	46.45	47.73	63.08	50.86	49.8	62.9
ENSMUSG00000013275.9	protein_coding	Slc41a1	10.4	13.63	11.31	6.57	10.73	8.12	7.64	11.3	7.68
ENSMUSG00000013338.10	protein_coding	Fer1l4	0.03	0.04	0.03	0.03	0.02	0.05	0.03	0.07	0.05
ENSMUSG00000013353.4	protein_coding	4931406B18Rik	0	0	0	0	0	0	0	0.06	0
ENSMUSG00000013367.4	protein_coding	Iglon5	1.76	1.26	2.02	2.36	2.51	3.68	2.67	3.05	4.36
ENSMUSG00000013415.3	protein_coding	Igf2bp1	1.71	1.55	2.04	5.04	6.76	6.45	7.69	7.49	7.58
ENSMUSG00000013418.8	protein_coding	B4galnt2	0.21	0.3	0.06	0.25	0.24	0.2	0.28	0.12	0.1
ENSMUSG00000013419.6	protein_coding	Zfp651	4.56	3.04	6.2	4.35	3.57	5.3	3.71	3.1	5.53
ENSMUSG00000013465.11	protein_coding	Cobra1	19.37	18.05	23.58	21.33	20.42	23.18	21.39	19.82	23.67
ENSMUSG00000013483.8	protein_coding	Card14	0.03	0.01	0.03	0.02	0.01	0.03	0.04	0	0.04
ENSMUSG00000013495.9	protein_coding	Tmem175	9.07	7.75	9.71	8.83	9.93	11.65	9.21	9.18	9.96
ENSMUSG00000013523.7	protein_coding	Bcas1	0.04	0	0	0.07	0.01	0.11	0.01	0.06	0.02
ENSMUSG00000013539.7	protein_coding	D16H22S680E	10.06	5.61	10.4	10.06	7.72	8.94	9.2	6.56	9.59
ENSMUSG00000013562.8	processed_transcript	4833413E03Rik	0.05	0.09	0	0.03	0	0	0	0	0
ENSMUSG00000013584.5	protein_coding	Aldh1a2	3.99	0.37	0.56	1.55	0.8	0.12	2.03	1.1	0.12
ENSMUSG00000013593.6	protein_coding	Ndufs2	82.77	80.31	87.49	86.61	82.99	86.51	89.22	91.94	93.84
ENSMUSG00000013611.8	protein_coding	Snx31	0.02	0.01	0.01	0.02	0.01	0.01	0	0.02	0
ENSMUSG00000013622.8	protein_coding	0610007C21Rik	46.76	23.82	54.37	46.94	28.4	47.37	37.8	27.55	45.88
ENSMUSG00000013629.10	protein_coding	Cad	13.15	14.38	12.99	10.76	14.47	13.62	12.81	11.93	18.58
ENSMUSG00000013643.7	protein_coding	2210415F13Rik	0	0	0	0	0	0	0	0	0
ENSMUSG00000013646.10	protein_coding	Sh3bp5l	8.9	7.35	10.15	12.87	11.61	15.11	11.98	11.78	15.64
ENSMUSG00000013653.2	protein_coding	1810065E05Rik	0	0	0	0	0	0	0	0	0.04
ENSMUSG00000013662.4	protein_coding	Atad1	28.77	37.27	33.11	26.87	31.99	29.24	29.02	32.36	30.05
ENSMUSG00000013663.7	protein_coding	Pten	42.92	31.51	44.86	28.88	27.96	34.21	30.17	31.01	34.28
ENSMUSG00000013668.8	protein_coding	4933402N03Rik	0	0	0	0	0	0	0	0	0
ENSMUSG00000013698.6	protein_coding	Pea15a	65.38	40.17	66.3	61.06	50.99	66.14	62.85	49.93	70.88
ENSMUSG00000013701.6	protein_coding	Timm23	46.33	57.55	48.23	49.74	51.96	49.57	56.47	57.91	60.62
ENSMUSG00000013707.3	protein_coding	Tnfaip8l2	0.45	0.22	0.33	0.23	0.22	0.07	0.09	0.19	0.37
ENSMUSG00000013736.10	protein_coding	Trnt1	27	27.2	26.73	26.48	30	26.4	27.64	29.73	32.53
ENSMUSG00000013766.5	protein_coding	Ly6g6e	0	0.04	0	0.04	0	0	0	0	0
ENSMUSG00000013787.9	protein_coding	Ehmt2	63.14	44.34	63.94	58.79	52.33	65.81	56.95	51.48	67.55
ENSMUSG00000013822.6	protein_coding	Elof1	50.82	42.94	56.46	57.35	51.56	54.75	55.5	54.21	58.87
ENSMUSG00000013833.8	protein_coding	Med16	9.52	4.31	8.77	8.74	6.47	11.94	9.61	7.36	11.9
ENSMUSG00000013846.8	protein_coding	St3gal1	29.35	24.39	24.8	28.24	28.29	25.22	31.44	40.17	24.69
ENSMUSG00000013858.7	protein_coding	ORF61	39.28	40.56	47.68	37.68	46.15	51.39	41.99	47.5	51.92
ENSMUSG00000013878.10	protein_coding	Rnf170	9.78	10.15	10.96	8.41	9.89	9.59	8.63	10.1	10.48
ENSMUSG00000013921.8	protein_coding	Clip3	22.55	10.54	19.18	18.49	12.9	21.9	17.76	15.42	21.41
ENSMUSG00000013928.6	protein_coding	Thap8	0.13	0.11	0.23	0.09	0.08	0.08	0.03	0.13	0.21
ENSMUSG00000013936.6	protein_coding	Myl2	0	0	0.08	0.17	0.08	0.09	0	0	0
ENSMUSG00000013973.6	protein_coding	Dedd	17.86	16.41	19.47	15.68	15.85	15.77	13.53	16.65	17.31
ENSMUSG00000013974.2	protein_coding	1810033B17Rik	0.47	0.34	0.56	0.15	0.17	0.61	0.45	0.5	0.67
ENSMUSG00000013989.4	lincRNA	D430018E03Rik	0.24	0.29	0.3	0.18	0.32	0.31	0.28	0.17	0.27
ENSMUSG00000013997.4	protein_coding	Nit1	13.58	11.26	16.41	13.41	12.29	14.22	12.23	13.33	16.37
ENSMUSG00000014030.9	protein_coding	Pax5	0	0.04	0	0	0.05	0.01	0	0	0
ENSMUSG00000014039.10	protein_coding	Prdm15	4.82	5.59	5.01	4.72	5.61	4.59	4.37	5.08	4.61
ENSMUSG00000014074.10	protein_coding	Rnf168	21.26	19.6	22.99	15.83	18.65	18.44	18.01	18.21	18.86
ENSMUSG00000014075.9	protein_coding	Tctex1d2	10.54	10.41	10.43	6.67	7.36	7.2	6.34	9.54	7.91
ENSMUSG00000014077.7	protein_coding	1500003O03Rik	44.08	39.36	46.92	45.4	38.99	46.76	49.45	46.71	47.96
ENSMUSG00000014104.6	protein_coding	Sval2	0	0	0	0	0	0	0	0	0
ENSMUSG00000014158.5	protein_coding	Trpv4	0.69	0.17	0.82	0.46	0.52	0.87	0.29	0.38	0.32
ENSMUSG00000014164.7	protein_coding	Klhl3	0.13	0.16	0.21	0.2	0.19	0.28	0.28	0.28	0.3
ENSMUSG00000014177.4	protein_coding	Fam18b	14.53	15.72	18.66	14.83	16.14	21.02	13.4	14.6	19.56
ENSMUSG00000014195.9	protein_coding	Dnajc7	27.93	28.54	30.71	29.03	35.45	35.35	31.79	37.87	38.15
ENSMUSG00000014198.8	protein_coding	Zfp385c	0.12	0.09	0.21	0.12	0.1	0.11	0.14	0.12	0.13
ENSMUSG00000014226.4	protein_coding	Cacybp	51.28	49.28	50.83	49.65	51.51	47.97	55.61	58.77	60.9
ENSMUSG00000014232.7	protein_coding	Cluap1	9.08	7.39	9.38	8	6.88	7.18	7.58	7.27	7.43
ENSMUSG00000014243.5	protein_coding	Zswim7	4.04	4.88	4.67	6.91	6.47	9.69	6.35	8.39	11.49
ENSMUSG00000014245.6	protein_coding	Pigl	2.48	2.52	2.56	2.53	3.01	3.22	2.7	2.61	2.72
ENSMUSG00000014294.3	protein_coding	Ndufa2	168.65	156.84	205.27	205.92	210.04	239.44	209.52	222.41	249
ENSMUSG00000014301.6	protein_coding	Pam16	23.81	21.77	27.77	22.78	21.95	26.24	23.31	22.94	29
ENSMUSG00000014303.7	protein_coding	Glis2	7.97	8.53	8.7	7.48	9.09	9.02	7.22	10.07	11.77
ENSMUSG00000014313.8	protein_coding	Cox6c	222.31	220.27	264.75	270.03	203.86	254.25	259.3	266.39	284.62
ENSMUSG00000014329.7	protein_coding	Bicc1	28.28	24.04	29.21	17.5	19.64	17.23	18.79	22.01	20.47
ENSMUSG00000014349.7	protein_coding	Ube2z	27.43	30.24	29.2	33.12	36.92	35.31	35.95	39.84	38.04
ENSMUSG00000014351.6	protein_coding	Gip	0	0	0.11	0	0	0	0	0	0
ENSMUSG00000014353.7	protein_coding	Tmem87b	9.68	9.45	11.18	8.96	10.37	10.84	9.32	10.49	10.85
ENSMUSG00000014355.4	protein_coding	Anapc1	50.27	49.56	49.62	47.23	58.03	50.59	58.94	61.64	60.63
ENSMUSG00000014361.5	protein_coding	Mertk	2.61	0.49	3.12	2.35	1.75	3.24	2.39	1.54	2.7
ENSMUSG00000014372.7	protein_coding	Cyp2d10	0	0	0	0	0	0	0	0	0
ENSMUSG00000014402.8	protein_coding	Tsg101	25.19	25.82	25.8	24.56	28.05	27.74	28.36	31.14	30.9
ENSMUSG00000014418.8	protein_coding	Hps5	14.03	11.12	16.56	14.16	12.48	14.06	13.49	14.28	16.48
ENSMUSG00000014426.7	protein_coding	Map3k4	11.1	6.32	9.9	9.5	8.01	9.7	9.92	8.6	9.94
ENSMUSG00000014444.9	protein_coding	Fam38a	24.34	19.3	23.13	19.69	22.74	21.56	23.08	20.96	25.79
ENSMUSG00000014453.3	protein_coding	Blk	0.01	0	0	0	0	0	0	0	0
ENSMUSG00000014470.4	protein_coding	Rnf166	25.2	20.24	26.85	19.45	20.8	24.5	19.98	20.58	23.01
ENSMUSG00000014496.7	protein_coding	Ankrd28	15.4	6.75	10.44	13.48	9.83	10.89	13.92	9.76	11.16
ENSMUSG00000014498.3	protein_coding	Ankrd52	9.57	8.34	8.8	6.66	9.25	8.41	9.94	12.23	11.14
ENSMUSG00000014503.7	protein_coding	Pkd2l2	0.91	0.59	1.07	0.85	1.03	1.07	0.96	0.92	1.37
ENSMUSG00000014504.9	protein_coding	Srp19	19.5	26.98	23.78	19.01	25.27	20.55	20.29	22.82	17.7
ENSMUSG00000014529.3	protein_coding	4930511M11Rik	0	0.02	0.02	0	0.02	0.02	0	0.05	0
ENSMUSG00000014542.2	protein_coding	Clec4f	0	0	0.01	0	0	0	0	0	0
ENSMUSG00000014543.7	protein_coding	Klra17	0	0	0	0	0.08	0.21	0.09	0.1	0.36
ENSMUSG00000014547.9	protein_coding	Wdfy2	5.93	4.94	5.88	5.12	5.57	7.09	5.45	5.95	6.34
ENSMUSG00000014550.8	protein_coding	Zfyve20	13.99	13.69	15.19	13.33	14.53	16.58	15.92	14.26	16.92
ENSMUSG00000014551.8	protein_coding	Mrps25	23.36	19.43	25.71	29.84	28.38	30.51	34.51	33.07	34.64
ENSMUSG00000014554.7	protein_coding	Dguok	16.32	11.02	18.05	17.6	15.07	21.99	18.15	17.03	24.04
ENSMUSG00000014592.10	protein_coding	Camta1	6.1	6.78	7.11	4.84	6.36	5.51	7	7.16	5.8
ENSMUSG00000014599.4	protein_coding	Csf1	96.68	52.74	82.93	112.93	90.57	94.33	123.23	68.98	125.76
ENSMUSG00000014601.8	protein_coding	Fam40a	14.56	10.24	16.92	17.27	12.93	19.27	17.87	14.49	20.01
ENSMUSG00000014602.8	protein_coding	Kif1a	1.45	0.83	1.38	1.08	1.38	0.99	0.66	0.51	0.34
ENSMUSG00000014603.1	protein_coding	Alx3	0.02	0	0.01	0	0	0.03	0	0	0.02
ENSMUSG00000014606.8	protein_coding	Slc25a11	39.67	33.15	47.98	55.74	48.87	62.21	58.11	55.42	69.49
ENSMUSG00000014609.9	protein_coding	Chrne	0.08	0.07	0.14	0	0	0.24	0.09	0.15	0
ENSMUSG00000014633.9	protein_coding	2310061C15Rik	19.26	11.2	21.91	18.21	12	22.6	20.87	16.14	25.29
ENSMUSG00000014668.8	protein_coding	Chfr	10.3	7.04	12.51	9.24	9.05	11.61	10.26	9.68	13.11
ENSMUSG00000014686.7	protein_coding	Ceacam16	0.04	0	0	0.02	0	0	0	0	0
ENSMUSG00000014704.8	protein_coding	Hoxa2	0.35	0.4	0.34	0.28	0.21	0.26	0.47	0.32	0.28
ENSMUSG00000014725.7	protein_coding	Adam28	0	0	0	0	0	0	0	0.01	0
ENSMUSG00000014747.4	protein_coding	Ankrd53	0.11	0.22	0.16	0.06	0.1	0.12	0.18	0.13	0.27
ENSMUSG00000014748.7	protein_coding	Tex261	26.26	17.99	22.86	19.89	23.17	24.66	20.18	20.17	26.7
ENSMUSG00000014763.7	protein_coding	Fam120b	8.96	7.05	8.75	8.5	7.96	9.45	8.61	8.49	9.39
ENSMUSG00000014767.10	protein_coding	Tbp	21.75	22.53	25.62	27.62	25.13	27.85	26.59	29.05	28.29
ENSMUSG00000014769.9	protein_coding	Psmb1	144.68	144.46	162.53	190.5	168.11	177.06	192.04	202.7	204.4
ENSMUSG00000014771.6	protein_coding	Pdcd2	25.32	25.39	26.37	30.4	33.84	27.09	28.41	29.53	29.96
ENSMUSG00000014773.7	protein_coding	Dll1	0.8	4.37	0.62	0.15	0.67	0.13	0.16	0.72	0.25
ENSMUSG00000014776.6	protein_coding	Nol3	0.31	0.49	0.43	0.34	0.96	0.58	0.56	0.79	0.51
ENSMUSG00000014778.4	protein_coding	Fhod1	6.91	4.91	5.93	4.75	3.78	4.9	5.63	5.44	4.38
ENSMUSG00000014782.8	protein_coding	Plekhg4	0.31	0.29	0.25	0.44	0.27	0.39	0.28	0.39	0.46
ENSMUSG00000014786.7	protein_coding	Slc9a5	2.51	2.02	2.66	1.98	2.06	2.45	1.85	1.74	2.6
ENSMUSG00000014791.8	protein_coding	Elmo3	1.09	0.99	1.21	0.96	1.11	1.42	0.91	1.05	1.53
ENSMUSG00000014813.7	protein_coding	Stc1	1.57	5.33	2.38	0.52	1.29	0.42	0.87	3.29	0.57
ENSMUSG00000014837.8	protein_coding	4931428F04Rik	0.3	0.14	0.43	0.38	0.26	0.63	0.47	0.47	0.91
ENSMUSG00000014846.5	protein_coding	Tppp3	3.52	2.25	3.37	3.53	3.26	6.23	2.57	3.34	3.92
ENSMUSG00000014850.8	protein_coding	Msh3	15.36	17.41	15.49	13	18.18	12.88	13.52	15.07	14.16
ENSMUSG00000014852.9	protein_coding	Adamts13	0.02	0	0.04	0.01	0.01	0.03	0	0	0.06
ENSMUSG00000014856.5	protein_coding	Tmem208	34.34	39.65	39.1	33.27	35.96	34.12	29.59	38.62	36.84
ENSMUSG00000014859.8	protein_coding	E2f4	23.17	26.81	21.85	17.73	22.08	19.84	20.22	24.55	22.11
ENSMUSG00000014867.3	protein_coding	Surf4	91.79	130.36	104.69	96.3	107.03	103.24	110.44	132.94	137.39
ENSMUSG00000014873.8	protein_coding	Surf2	18.8	16.93	17.89	18.66	19.77	15.75	19.96	19.59	19.15
ENSMUSG00000014905.3	protein_coding	Dnajb9	12.44	20.94	12.5	10.81	14.7	11.86	11.57	12.44	11.32
ENSMUSG00000014907.8	protein_coding	Naf1	6.08	8.24	6.32	6	6.31	8.56	8.13	7.01	10.69
ENSMUSG00000014932.8	protein_coding	Yes1	15.07	14.73	17.27	12.22	13.95	14.02	12.37	13.46	12.48
ENSMUSG00000014956.9	protein_coding	Ppp1cb	33.5	31.23	39.33	33.76	27	37.3	29.64	35.53	39.69
ENSMUSG00000014959.6	protein_coding	Gorasp2	49.89	58	52.58	51.8	55.63	51.7	55.75	60.12	57.23
ENSMUSG00000014980.8	protein_coding	Tsen15	17.59	16.53	18.51	17.69	13.26	16.84	15.42	15.14	18.92
ENSMUSG00000015001.10	protein_coding	Oc90	0.07	0.02	0	0.05	0.03	0.06	0.06	0.04	0.02
ENSMUSG00000015002.9	protein_coding	Efr3a	38.8	36.86	36.89	41.2	45.18	44.59	46.32	47.99	47.61
ENSMUSG00000015013.8	protein_coding	Trappc2l	55.57	41.06	63.14	60.62	48.48	57.23	51.5	46.64	61.26
ENSMUSG00000015016.6	protein_coding	Acsf3	6.41	5.7	6.75	5.33	5.09	5.83	5.97	5.24	6.98
ENSMUSG00000015023.7	protein_coding	Ddx19a	35.68	32.66	39.39	32.68	32.46	35.47	36.94	35.84	38.61
ENSMUSG00000015027.9	protein_coding	Galns	15.88	9.64	15.04	13.78	13.73	15.76	12.35	12.84	16.23
ENSMUSG00000015053.8	protein_coding	Gata2	10.4	7.44	7.83	5.94	4.94	4.93	6.49	6.17	4.77
ENSMUSG00000015083.5	protein_coding	C8g	1.07	0.72	1.26	1.16	0.76	1.81	0.95	0.76	1.64
ENSMUSG00000015085.7	protein_coding	Entpd2	0.6	0.43	0.61	0.24	0.29	0.19	0.33	0.21	0.04
ENSMUSG00000015087.8	protein_coding	B230208H17Rik	33.49	32.63	36.07	31.83	30.8	31.98	27.52	27.66	33.98
ENSMUSG00000015090.7	protein_coding	Ptgds	0.85	0.05	1.25	0.6	0.26	0.73	0.43	0	0.3
ENSMUSG00000015092.3	protein_coding	Edf1	104.72	87.16	122.41	121.76	103.86	123.03	132.59	120.75	141.89
ENSMUSG00000015093.8	protein_coding	Clic3	0.62	0.2	0.68	0.49	0.34	0.69	0.54	0.29	0.43
ENSMUSG00000015094.9	protein_coding	Npdc1	35.65	23.12	31.05	35.82	31.83	28.85	30.31	26.14	27.4
ENSMUSG00000015095.5	protein_coding	Fbxw5	23.08	18.95	25.14	22.21	23.51	25.93	22.06	23.44	30.23
ENSMUSG00000015112.7	protein_coding	Slc25a13	5.08	5.02	5.45	5.65	5.58	6.34	7.27	7.55	8.82
ENSMUSG00000015120.9	protein_coding	Ube2i	203.88	181.46	204.81	223.83	205.75	241.85	244.37	237.88	269.54
ENSMUSG00000015126.8	protein_coding	0610007P22Rik	14.68	17.22	13.98	17.5	19.31	16.06	18.24	21.5	20.77
ENSMUSG00000015127.7	protein_coding	Unkl	7.51	5.99	7.41	5.84	7.89	7.28	7.62	7.41	6.86
ENSMUSG00000015133.9	protein_coding	Lrrk1	11.79	4.82	11.14	11.4	8.75	12.62	15.13	9.65	12.36
ENSMUSG00000015134.8	protein_coding	Aldh1a3	1.39	0.9	0.56	1.3	0.87	0.73	0.95	0.77	0.92
ENSMUSG00000015143.8	protein_coding	Actn1	50.61	35.65	57.2	52.69	43.72	65.92	69.08	60.16	91.82
ENSMUSG00000015149.7	protein_coding	Sirt2	26.49	17.28	25.38	27	20.93	24.4	23.28	18.41	24.11
ENSMUSG00000015165.9	protein_coding	Hnrnpl	143.96	141.59	140.37	129.29	139.41	134.57	145.75	144.9	151.26
ENSMUSG00000015176.8	protein_coding	Nolc1	35.22	45.49	32.53	31.84	37.22	31.15	38.85	39.31	40.39
ENSMUSG00000015189.5	protein_coding	Casd1	9.89	10.77	12.7	10.24	11.51	12.95	10.49	12.49	14.25
ENSMUSG00000015202.7	protein_coding	Cnksr3	6.42	2.39	5.05	4.46	3.15	7.08	4.4	3.4	5.96
ENSMUSG00000015214.7	protein_coding	Mtmr1	10.75	6	11.81	10.93	7.64	10.28	12.17	7.53	12.97
ENSMUSG00000015217.5	protein_coding	Hmgb3	11.03	11.73	11.03	10.09	7.74	6.93	9.68	10.44	11.77
ENSMUSG00000015222.10	protein_coding	Mtap2	5.22	2.52	5.98	4.25	3.18	5.28	4.33	1.89	5.37
ENSMUSG00000015224.9	protein_coding	Cyp2j9	0.95	0.17	0.37	1.74	1.21	2.03	1.16	0.76	2.26
ENSMUSG00000015242.7	protein_coding	Nipsnap3a	0	0	0	0	0	0	0	0	0
ENSMUSG00000015243.4	protein_coding	Abca1	12.23	15.38	13.21	5.69	12.46	9.51	6.65	13.26	13.96
ENSMUSG00000015247.4	protein_coding	Nipsnap3b	20.77	22	24.19	25.55	25.64	23.04	25.25	28.64	27.27
ENSMUSG00000015289.4	protein_coding	Lage3	31.4	23.19	36.36	38.77	27	36.76	31.6	28.65	39.93
ENSMUSG00000015290.8	protein_coding	Ubl4	22.89	20.32	21.29	19.62	18.32	14.71	20.8	19.58	19.35
ENSMUSG00000015291.4	protein_coding	Gdi1	59.74	42.64	68.54	54.04	52.07	57.94	50.85	47.24	61.03
ENSMUSG00000015305.5	protein_coding	Sash1	19.03	10.07	18.62	14.58	12.39	15.56	16.39	12.25	16.31
ENSMUSG00000015312.8	protein_coding	Gadd45b	16.34	12.16	15.35	17.7	13.14	19.77	19.13	15.17	22.4
ENSMUSG00000015314.4	protein_coding	Slamf6	0	0	0	0	0	0	0.01	0	0
ENSMUSG00000015316.9	protein_coding	Slamf1	0	0	0	0	0	0	0	0	0
ENSMUSG00000015335.10	protein_coding	Zdhhc12	6.1	7.95	7.15	6.54	8.29	7.87	7.86	8.49	9.3
ENSMUSG00000015337.5	protein_coding	Endog	2.51	1.99	2.32	2.17	1.74	1.69	2.14	1.73	2.17
ENSMUSG00000015340.4	protein_coding	Cybb	0.01	0	0	0	0.01	0	0	0.01	0.14
ENSMUSG00000015341.10	protein_coding	Golga7	31.2	33.52	34.52	29.49	30.05	32.21	32.42	34.51	35.1
ENSMUSG00000015342.6	protein_coding	Xk	0.78	0.32	0.89	0.41	0.51	0.76	0.63	0.68	0.76
ENSMUSG00000015354.8	protein_coding	Pcolce2	2.33	0.69	0.75	1.54	0.69	0.86	1.75	0.55	0.84
ENSMUSG00000015355.7	protein_coding	Cd48	0	0	0	0	0	0	0	0	0
ENSMUSG00000015357.4	protein_coding	Clpx	18.37	15.79	19.26	17.45	14.23	20.08	18.03	17.72	18.62
ENSMUSG00000015363.7	protein_coding	Trabd	18.28	19.79	19.92	22.36	22.07	23.87	24.1	22.99	26.09
ENSMUSG00000015365.8	protein_coding	Mov10l1	0	0.03	0.01	0	0	0	0	0	0
ENSMUSG00000015377.9	protein_coding	Fam116b	0.83	1.26	0.89	0.79	1.36	0.98	0.73	1.03	1.16
ENSMUSG00000015396.2	protein_coding	Cd83	0.01	0.01	0.02	0	0	0.01	0	0	0
ENSMUSG00000015401.6	protein_coding	Tmem27	0	0.06	0	0	0	0	0	0	0
ENSMUSG00000015405.9	protein_coding	Ace2	0	0	0.05	0.52	0	0.06	0.19	0	0.06
ENSMUSG00000015437.4	protein_coding	Gzmb	0	0	0	0	0	0	0	0	0
ENSMUSG00000015441.3	protein_coding	Gzmf	0	0	0	0	0	0	0	0	0
ENSMUSG00000015443.7	protein_coding	Gzmn	0	0	0	0	0	0	0	0	0
ENSMUSG00000015451.9	processed_transcript	C4a	0.85	0.41	0.71	0.61	0.74	0.82	0.92	0.77	0.28
ENSMUSG00000015452.6	protein_coding	Ager	1.02	1.04	0.82	0.82	0.75	1.05	0.49	0.97	1.13
ENSMUSG00000015461.8	protein_coding	Atf6b	17.36	13.63	17.08	15.47	15.74	17.11	17.98	17.08	18.17
ENSMUSG00000015467.8	protein_coding	Egfl8	0.94	0.45	0.91	0.42	0.65	0.75	0.37	0.46	0.51
ENSMUSG00000015468.8	protein_coding	Notch4	0.96	0.52	0.95	0.41	0.59	0.95	0.76	0.89	1.25
ENSMUSG00000015474.10	protein_coding	Ppt2	11.36	9.4	13.69	12.64	10.34	14.45	14	11.41	14.11
ENSMUSG00000015476.6	protein_coding	Prrt1	0.22	0.23	0.27	0.14	0.2	0.27	0.27	0.11	0.32
ENSMUSG00000015478.7	protein_coding	Rnf5	6.88	5.31	8	7.9	6.66	8.21	6.88	6.17	7.67
ENSMUSG00000015484.3	protein_coding	Fam163a	0	0.01	0.01	0	0.01	0.01	0	0.01	0
ENSMUSG00000015488.8	protein_coding	5930434B04Rik	6.41	6	5.83	4.7	6.12	5.29	4.51	6.45	6.91
ENSMUSG00000015501.4	protein_coding	Hivep2	7.45	8.44	9.53	5.18	7.51	7.85	7.09	9.4	10.69
ENSMUSG00000015519.6	protein_coding	2310057J18Rik	0	0	0	0	0	0	0	0	0
ENSMUSG00000015522.11	protein_coding	Arnt	27.77	23.76	30.04	20.7	26.31	28.18	26.74	30.9	30.38
ENSMUSG00000015533.8	protein_coding	Itga2	0.74	1.96	0.94	0.34	0.82	0.36	0.58	0.89	0.39
ENSMUSG00000015536.7	protein_coding	Mocs2	26.09	22.43	29.71	28.94	25.24	30.22	27.96	27.37	31.85
ENSMUSG00000015542.11	protein_coding	Nat9	7.44	5.66	7.72	10.41	9.72	10.55	7.4	6.35	11.08
ENSMUSG00000015568.8	protein_coding	Lpl	31.74	5.83	44.75	15.31	11.68	15.71	19.69	16.72	16.43
ENSMUSG00000015575.8	protein_coding	Atp6v0e	78.94	65.45	100.05	95.62	78.71	98.87	91.02	81.26	104.04
ENSMUSG00000015579.4	protein_coding	Nkx2-5	0.61	0.45	0.7	0.87	0.46	0.57	1.05	0.47	0.91
ENSMUSG00000015597.9	protein_coding	Zfp318	5.25	3.96	5.76	6.21	5.87	6.25	4.86	5.78	5.95
ENSMUSG00000015599.8	protein_coding	Ttbk1	0.28	0.2	0.28	0.37	0.22	0.56	0.46	0.2	0.32
ENSMUSG00000015605.5	protein_coding	Srf	12.36	9.66	10.49	14.94	12.64	15.71	16.32	13.23	19.21
ENSMUSG00000015619.9	protein_coding	Gata3	2.22	0.85	1.09	1.45	0.8	1.37	2.13	1.33	1.46
ENSMUSG00000015627.4	protein_coding	Gata5	0	0	0	0	0	0	0	0	0
ENSMUSG00000015647.8	protein_coding	Lama5	6.57	3.38	8.78	3.76	5.86	6.31	2.96	4.31	4.75
ENSMUSG00000015652.3	protein_coding	Steap1	36.22	76.26	16.54	21.14	46.83	11.39	29.88	56.1	12.69
ENSMUSG00000015653.7	protein_coding	Steap2	51.73	69.4	32.87	26.68	50.78	22.49	35.87	64.13	21.19
ENSMUSG00000015656.10	protein_coding	Hspa8	920.17	1019.34	910.02	1042.25	1045.09	1027.4	1229.51	1229.07	1314.96
ENSMUSG00000015659.6	protein_coding	Serac1	9.03	4.98	7.51	5.78	7.37	6.78	6.38	6.04	6.71
ENSMUSG00000015665.8	protein_coding	Awat1	0	0	0	0	0	0	0	0	0
ENSMUSG00000015668.7	protein_coding	Pdzd11	33.97	30.81	41.14	35.04	28.32	37.83	37.11	33.1	41.01
ENSMUSG00000015671.9	protein_coding	Psma2	40.86	45.41	42.88	48.62	45.79	43.79	50.58	54.83	53.07
ENSMUSG00000015672.3	protein_coding	Mrpl32	18.43	20.48	20.11	23.13	23.38	18.74	22.68	24.68	24.3
ENSMUSG00000015697.8	protein_coding	Setdb1	21.37	23.17	22.15	18.76	23.03	21.35	21.2	26.33	25.38
ENSMUSG00000015702.7	protein_coding	Anxa9	1.94	2.98	1.29	1.48	2.17	1.45	1.67	1.93	1.65
ENSMUSG00000015709.8	protein_coding	Arnt2	5.12	3.16	4.49	3.04	2.39	2.79	2.72	2.3	2.91
ENSMUSG00000015711.8	protein_coding	Prune	11.16	9.32	12.78	11.25	10.8	12.47	11.62	11.17	11.46
ENSMUSG00000015714.4	protein_coding	Lass2	64.82	81.23	66.34	70.98	86.36	67.36	72.07	81.22	76.37
ENSMUSG00000015721.10	protein_coding	Nlrp5	0	0.01	0	0	0	0.02	0	0	0
ENSMUSG00000015733.7	protein_coding	Capza2	61.63	57.11	60.73	61.72	64.86	64.19	69.32	68.9	71.73
ENSMUSG00000015745.3	protein_coding	Plekho1	35.55	33.04	26.24	31.7	33.3	27.6	29.93	35.71	32
ENSMUSG00000015747.5	protein_coding	Vps45	12.63	8.5	13.09	13.18	11.16	16.28	14.28	13.32	19.03
ENSMUSG00000015748.7	protein_coding	Prpf3	20.18	16.63	18.2	21.3	23.25	20.3	18.92	18.64	22.7
ENSMUSG00000015749.6	protein_coding	Anp32e	35.63	35.36	36.24	35.8	36.16	30.9	36.99	36.65	32.92
ENSMUSG00000015750.8	protein_coding	Aph1a	32.7	27.62	33.25	34.12	33.06	33.63	36.43	33.71	36.28
ENSMUSG00000015755.10	protein_coding	Tab2	22.83	25.76	24.74	19.68	24.33	25.59	22.39	28.42	29.33
ENSMUSG00000015757.4	protein_coding	Ppil4	12.76	11.24	14.3	13.26	15.31	15.55	15.3	15.18	16.68
ENSMUSG00000015759.4	protein_coding	Cnih	29.83	41.6	30.58	37.06	36.23	36.85	43.17	41.82	43.26
ENSMUSG00000015766.8	protein_coding	Eps8	91.22	83.88	59.27	65.91	129.11	67.65	109.62	132.35	62.2
ENSMUSG00000015776.6	protein_coding	Med22	22.25	15.46	23.56	24.94	20.94	27.58	27.4	23.67	27.99
ENSMUSG00000015787.9	protein_coding	Abo	0	0.01	0	0	0	0	0	0	0
ENSMUSG00000015790.7	protein_coding	Surf1	28.75	21.58	29.88	31.81	27.21	28.26	28.45	29.19	28.91
ENSMUSG00000015804.8	protein_coding	Med28	95.59	81.94	96.02	100.01	93.61	101.81	90.6	85.37	99.8
ENSMUSG00000015806.6	protein_coding	Qdpr	26.61	22.55	24.17	22.58	24.75	25.98	24.48	19.07	23.82
ENSMUSG00000015812.7	protein_coding	Gnrh1	0.52	0.2	0.41	0.28	0.06	0.72	0.24	0.29	0.45
ENSMUSG00000015829.7	protein_coding	Tnr	0.29	0.07	0.16	0.03	0.18	0.07	0.11	0.24	0.05
ENSMUSG00000015837.9	protein_coding	Sqstm1	189.7	222.25	204.77	231.53	296.88	247.05	208.31	174.08	236.29
ENSMUSG00000015839.6	protein_coding	Nfe2l2	74.39	62.09	69.51	70.67	68.02	64.69	63.65	61.99	54.47
ENSMUSG00000015843.4	protein_coding	Rxrg	0.07	0.02	0	0	0.02	0	0.02	0	0
ENSMUSG00000015846.8	protein_coding	Rxra	26.45	19.83	28.81	21.64	21.24	22.73	21.33	19.15	22.53
ENSMUSG00000015850.5	protein_coding	Adamtsl4	5.72	1.27	4.23	5.56	2.47	4.39	6.42	3.95	5.71
ENSMUSG00000015852.7	protein_coding	Fcrls	0	0	0	0	0	0	0	0	0
ENSMUSG00000015854.6	protein_coding	Cd5l	0	0.01	0	0	0	0	0	0	0
ENSMUSG00000015869.10	protein_coding	Prpsap1	31.59	25.68	31.76	37.72	36.7	40.36	43.19	38.72	44.19
ENSMUSG00000015879.7	protein_coding	Fam184b	0.18	0.1	0.11	0.09	0.13	0.12	0.12	0.08	0.1
ENSMUSG00000015880.9	protein_coding	Ncapg	31.53	31.7	33.07	27.89	34.33	26.95	31.21	37.6	31.28
ENSMUSG00000015882.10	protein_coding	Lcorl	6.95	6.03	7.26	5.85	6.67	6.17	5.83	4.91	5.93
ENSMUSG00000015889.7	protein_coding	Lta4h	31.75	20.82	33.42	32.58	27.43	35.32	30.73	29.63	37.04
ENSMUSG00000015890.2	protein_coding	Amdhd1	0.02	0.14	0.04	0.03	0.06	0.03	0.05	0.07	0.09
ENSMUSG00000015932.8	protein_coding	Dstn	107.74	57.38	108.68	157.78	79.34	146.51	158.01	100.22	189.55
ENSMUSG00000015937.8	protein_coding	H2afy	64.61	77.59	63.25	53.11	69.76	63.63	66.59	78.96	68.8
ENSMUSG00000015942.3	protein_coding	Gtf2ird2	6.49	6.28	5.76	4.2	6.05	4.78	4.38	5.13	4.6
ENSMUSG00000015943.4	protein_coding	Bola1	15.73	16.46	21.51	19.14	20.57	20.2	19.52	21.04	24.02
ENSMUSG00000015944.8	protein_coding	Gatsl2	6.27	2.57	6.6	4.5	3.76	5.88	5.16	4.91	6.29
ENSMUSG00000015947.5	protein_coding	Fcgr1	0.01	0.01	0.02	0	0.02	0.02	0.03	0.02	0
ENSMUSG00000015950.6	protein_coding	Ncf1	0.01	0.04	0.02	0.15	0.07	0.06	0.05	0.02	0.01
ENSMUSG00000015957.4	protein_coding	Wnt11	0.26	0.27	0.3	1.69	0.11	0.83	0.8	0.15	0.68
ENSMUSG00000015961.8	protein_coding	Adss	27.04	24.01	23.73	24.62	23.29	23.17	27.44	24.71	28.77
ENSMUSG00000015962.5	protein_coding	1700016C15Rik	0	0	0.04	0	0	0.08	0	0	0
ENSMUSG00000015966.9	protein_coding	Il17rb	0.44	0.2	0.32	0.14	0.22	0.23	0.3	0.11	0.34
ENSMUSG00000015968.9	protein_coding	Cacna1d	0.01	0.03	0.01	0	0	0.01	0	0.02	0
ENSMUSG00000015970.11	protein_coding	Chdh	0.48	0.02	0.12	0.04	0.07	0.03	0.05	0	0.03
ENSMUSG00000015971.4	protein_coding	Actr8	10.73	10.89	11.36	11.27	9.98	11.33	11.53	10.04	12.9
ENSMUSG00000015980.8	protein_coding	Lrrc27	0.96	2.73	1.48	1.52	1.56	1.24	0.78	1.02	2.23
ENSMUSG00000015981.5	protein_coding	Stk32c	0.06	0.04	0.04	0.05	0	0.04	0.02	0.04	0
ENSMUSG00000015994.9	protein_coding	Fnta	33.87	24.48	36.47	35.86	24.65	38.34	35.8	28.47	40.43
ENSMUSG00000016018.3	protein_coding	Skiv2l2	26.1	24.45	25.61	27.16	28.73	26.59	28.67	30.74	27.04
ENSMUSG00000016024.3	protein_coding	Lbp	8.87	3.5	8.48	4.76	3.88	4.17	4.5	5.28	11.16
ENSMUSG00000016028.8	protein_coding	Celsr1	0.1	0.02	0.11	0.1	0.06	0.06	0.1	0.05	0.06
ENSMUSG00000016087.6	protein_coding	Fli1	0.52	0.6	0.46	0.31	0.32	0.19	0.3	0.24	0.19
ENSMUSG00000016128.8	protein_coding	Stard13	6.64	4.31	6.94	7.03	4.88	8.53	8.19	6.07	8.48
ENSMUSG00000016150.9	protein_coding	Odz1	0.01	0	0.03	0	0	0.01	0	0	0.01
ENSMUSG00000016179.5	protein_coding	Camk1g	0.21	0.04	0.59	0.11	0.11	0.24	0.08	0.05	0.23
ENSMUSG00000016181.4	protein_coding	Diexf	2.82	3.13	2.5	2.83	2.85	2.69	2.88	2.7	3.13
ENSMUSG00000016194.8	protein_coding	Hsd11b1	17.98	6.77	24.73	4.25	9.19	4.87	6.07	20.78	4.88
ENSMUSG00000016200.7	protein_coding	Syt14	0	0.01	0.03	0.03	0.03	0.03	0	0	0
ENSMUSG00000016206.6	protein_coding	H2-M3	11.31	9.05	8.2	12.18	10.66	9.87	9.35	8.63	10.75
ENSMUSG00000016239.5	protein_coding	Lonrf3	20.04	22.47	16.57	11.72	17.32	9.23	11.64	14.72	8.51
ENSMUSG00000016252.7	protein_coding	Atp5e	109.77	91.93	124.98	117.47	99.08	117.21	117.41	112.61	127.02
ENSMUSG00000016253.6	protein_coding	Th1l	27.34	21.45	30.07	29.88	30.49	34.23	33.75	33.38	37.07
ENSMUSG00000016255.5	protein_coding	Tubb1	0	0	0	0.04	0	0.02	0	0	0
ENSMUSG00000016256.9	protein_coding	Ctsz	112.22	91.1	116.05	101.47	120.43	108.04	97.18	109.71	105.7
ENSMUSG00000016257.9	protein_coding	Slmo2	31.09	36.86	36.56	36.78	39.05	37.72	39.03	48.31	43.69
ENSMUSG00000016262.7	protein_coding	Sertad4	3.58	0.77	7.23	2.84	2.33	5.93	3.03	2.04	7.02
ENSMUSG00000016283.6	protein_coding	H2-M2	0	0	0	0	0.03	0	0	0	0.04
ENSMUSG00000016308.8	protein_coding	Ube2a	27.82	30.46	33.54	29.02	26.2	24.84	30.87	30.09	27.69
ENSMUSG00000016319.3	protein_coding	Slc25a5	287.36	373.02	311.9	322.73	264.66	251.84	365.11	322.48	330.37
ENSMUSG00000016327.3	protein_coding	Atp1b4	0.02	0	0.02	0.02	0.03	0.01	0.04	0.02	0.01
ENSMUSG00000016344.8	protein_coding	Ppdpf	18.63	14.07	23.13	22.29	15.82	24.36	21.22	19.94	26.01
ENSMUSG00000016346.11	protein_coding	Kcnq2	0	0	0.01	0	0	0	0	0	0.01
ENSMUSG00000016349.9	protein_coding	Eef1a2	0	0.01	0.05	0	0.01	0	0	0	0
ENSMUSG00000016356.10	protein_coding	Col20a1	0.4	0.12	0.26	0.11	0.06	0.17	0.1	0.08	0.1
ENSMUSG00000016382.9	protein_coding	Pls3	60.65	43.56	65.46	57.85	41.51	53.71	60.73	52.63	59.29
ENSMUSG00000016386.9	protein_coding	Mpped2	0.61	0.11	0.37	0.3	0.17	0.21	1	0.27	0.3
ENSMUSG00000016409.4	protein_coding	Nkap	11.36	8.95	10.23	8.85	10.14	8.75	8.17	8.88	9.12
ENSMUSG00000016427.7	protein_coding	Ndufa1	126.54	97.63	142.69	124.36	100.19	116.13	111.87	108.05	124.39
ENSMUSG00000016458.6	protein_coding	Wt1	0.41	0.54	0.2	0.06	0.26	0.02	0.12	0.76	0.05
ENSMUSG00000016477.11	protein_coding	E2f3	8.31	8.26	5.34	5.28	6.13	4.99	5.77	7.6	5.5
ENSMUSG00000016481.9	protein_coding	Cr1l	12.73	16.99	14.35	11.78	14.63	10.48	11.95	14.08	13.39
ENSMUSG00000016487.9	protein_coding	Ppfibp1	50.61	38.59	53.81	48.11	51.16	55.29	57.38	50.06	57.06
ENSMUSG00000016493.6	protein_coding	Cd46	0.33	0.37	0.4	0.28	0.48	0.24	0.25	0.25	0.3
ENSMUSG00000016494.3	protein_coding	Cd34	16.12	4.09	21.19	8.78	1.9	10.23	10.11	3.39	14.96
ENSMUSG00000016495.6	protein_coding	5033414D02Rik	34.77	25.85	40.27	31.46	38.26	38.59	32.66	34.32	39.7
ENSMUSG00000016496.7	protein_coding	Cd274	1.12	1.81	0.97	0.58	2.38	0.91	0.85	1.45	0.77
ENSMUSG00000016498.9	protein_coding	Pdcd1lg2	0.02	0.05	0	0	0	0	0.02	0	0.04
ENSMUSG00000016503.9	protein_coding	Gtf3a	35.81	28.78	34.37	39.37	33.39	37.02	39.31	37.02	44.6
ENSMUSG00000016510.5	protein_coding	Mtif3	9.29	8	8.37	10.27	7.89	12.86	10.54	9.31	9.47
ENSMUSG00000016520.7	protein_coding	Lnx2	3.19	3.01	3.37	3.32	2.89	2.98	2.72	3.04	3.35
ENSMUSG00000016524.6	protein_coding	Il19	0.12	0.71	0	0.03	0.11	0.03	0.14	0.54	0.05
ENSMUSG00000016526.7	protein_coding	Dyrk3	1.71	2.71	1.63	1.71	1.91	1.66	2.17	2.12	2.06
ENSMUSG00000016528.3	protein_coding	Mapkapk2	94.43	93.06	114.79	65.75	84.24	74.66	83.5	115.75	85.44
ENSMUSG00000016529.5	protein_coding	Il10	0	0	0	0	0	0	0	0	0
ENSMUSG00000016534.9	protein_coding	Lamp2	393.14	324.81	371.57	326.06	343.87	286.26	312.12	312.73	291.38
ENSMUSG00000016541.8	protein_coding	Atxn10	53.41	40.18	50.19	57.39	47	53.24	56.17	50.8	56.82
ENSMUSG00000016552.7	protein_coding	Foxred2	6.3	6.38	6.02	7.23	9.29	6.69	7.3	7.6	5.94
ENSMUSG00000016554.8	protein_coding	Eif3d	86.35	98.02	85.48	110.78	112.57	110.2	121.55	118.96	124.1
ENSMUSG00000016559.8	protein_coding	H3f3b	275.47	341.82	281.13	283.6	334.95	272.05	291.94	381.06	298.57
ENSMUSG00000016619.8	protein_coding	Nup50	28.61	25.51	30.92	31.9	31.59	30.29	34.98	34.77	37.13
ENSMUSG00000016624.8	protein_coding	Phf21b	0.28	0.16	0.09	0.03	0.14	0.08	0.05	0.21	0.15
ENSMUSG00000016626.7	protein_coding	Nlrp14	0	0	0	0	0	0	0	0	0
ENSMUSG00000016637.6	protein_coding	Ift27	23.27	15.07	24.51	28.29	19.6	28.51	27.49	23.84	32.2
ENSMUSG00000016664.7	protein_coding	Pacsin2	26.57	22.56	30.34	28.98	29.67	31.44	31.85	29.93	36.14
ENSMUSG00000016756.9	protein_coding	Cmah	0.02	0.04	0.1	0.09	0.06	0.04	0.04	0.06	0.07
ENSMUSG00000016757.4	protein_coding	Ttll12	14.54	11.59	14.2	16.91	14.52	18.29	19.68	17.42	22.06
ENSMUSG00000016758.3	protein_coding	Bik	0.72	0.72	1.2	0.92	0.59	0.67	0.64	0.86	0.79
ENSMUSG00000016763.8	protein_coding	Scube1	0	0	0.01	0	0	0.01	0	0	0
ENSMUSG00000016831.11	protein_coding	Tox4	13.26	12.93	13.37	12.56	13.87	15.49	13.76	13.66	14.87
ENSMUSG00000016833.8	protein_coding	Mrps18c	38.6	37.51	42.47	40.71	44.03	40.9	42.02	46.07	44.21
ENSMUSG00000016918.8	protein_coding	Sulf1	4.65	17.7	6.32	2.09	8.17	4.77	3.8	23.56	6.87
ENSMUSG00000016921.8	protein_coding	Srsf6	63.86	63.19	65.56	62.75	64.05	58.81	65.79	68.58	67.72
ENSMUSG00000016933.11	protein_coding	Plcg1	28.59	15.89	27.77	25.53	21.29	26.93	24.06	21.58	27.66
ENSMUSG00000016940.11	protein_coding	Kctd2	9.14	7.18	10.5	10.24	11.36	12.11	10.78	10.3	12.92
ENSMUSG00000016942.4	protein_coding	Tmprss6	0.18	0.15	0.1	0.09	0.12	0.12	0.07	0.15	0.13
ENSMUSG00000016946.5	protein_coding	Kctd5	21.81	19.89	20.31	21.89	22.77	23.4	25.77	31.53	27.14
ENSMUSG00000016982.4	protein_coding	Pom121l2	0.15	0.13	0.05	0.04	0.04	0.02	0.02	0.03	0.07
ENSMUSG00000016984.7	protein_coding	Etaa1	6.89	6.43	6.17	7.56	8.59	7.37	7.95	9.16	6.8
ENSMUSG00000016995.10	protein_coding	Matn4	3.44	0.08	0.23	0.72	0.07	0.11	0.56	0.03	0.08
ENSMUSG00000016998.2	protein_coding	Svs4	0.05	0	0	0	0	0	0	0	0
ENSMUSG00000017000.2	protein_coding	Svs6	0	0	0	0	0	0	0	0	0
ENSMUSG00000017002.8	protein_coding	Slpi	7.27	55.7	2.1	1.31	3.1	0.14	2.04	4.1	0.36
ENSMUSG00000017003.7	protein_coding	Svs3a	0	0	0	0	0	0	0	0	0
ENSMUSG00000017004.7	protein_coding	Svs5	0	0	0	0	0	0	0	0	0
ENSMUSG00000017007.3	protein_coding	Rbpjl	0.12	0.01	0.02	0.01	0.01	0.01	0.02	0.02	0
ENSMUSG00000017009.3	protein_coding	Sdc4	168.44	156.44	148.43	132.54	168.35	153.05	164.46	221.56	145.83
ENSMUSG00000017049.4	protein_coding	Ccdc70	0	0	0	0	0	0	0	0	0
ENSMUSG00000017057.8	protein_coding	Il13ra1	54.11	105.15	19.06	29.36	59.87	10.48	34.89	66.95	10.38
ENSMUSG00000017064.4	protein_coding	Prl5a1	0	0	0	0	0	0	0	0	0
ENSMUSG00000017119.12	protein_coding	Nbr1	48.77	39.96	55.23	50.48	55.47	66.22	53.6	55.94	61.78
ENSMUSG00000017132.10	protein_coding	Cyth1	5.81	4.86	6.99	5.91	6.44	9.5	7.22	7.06	9.13
ENSMUSG00000017144.2	protein_coding	Rnd3	43.92	13.63	52.67	47.89	23.98	50.27	51.41	24.52	52.27
ENSMUSG00000017146.6	protein_coding	Brca1	18.27	17.14	16.55	18.87	25.34	19.69	20.49	26.36	18.06
ENSMUSG00000017165.1	protein_coding	Gast	0	0	0	0	0	0	0	0	0
ENSMUSG00000017167.6	protein_coding	Cntnap1	1.34	2.05	1.91	1.06	1.72	1.52	1.26	2	1.35
ENSMUSG00000017176.10	protein_coding	Nt5c3l	30.16	28.04	32.72	35.39	35.69	36.79	36.92	37	43.82
ENSMUSG00000017188.3	protein_coding	Ccdc56	26.83	24.06	32.77	42.68	34.48	45.24	36.43	36.27	48.32
ENSMUSG00000017195.9	protein_coding	Zpbp2	0.02	0.07	0.07	0.16	0.07	0.07	0.05	0.02	0.03
ENSMUSG00000017204.4	protein_coding	Gsdma	0	0.01	0.01	0.01	0.01	0.01	0.01	0.02	0
ENSMUSG00000017210.7	protein_coding	Med24	23.52	26.92	21.97	23.12	31.72	28.15	28.28	37.61	29.99
ENSMUSG00000017211.8	protein_coding	Gsdma2	0.05	0	0	0	0.02	0	0	0	0
ENSMUSG00000017221.8	protein_coding	Psmd3	50.72	49.07	50.3	58.97	64.28	62.3	66.68	69.18	72.18
ENSMUSG00000017264.9	protein_coding	Exosc10	44.29	39.5	43.21	43.52	47.55	49.28	48.45	50.08	55.42
ENSMUSG00000017286.9	protein_coding	Glod4	16.3	15.22	18.05	21.86	19.41	20.23	20.8	23.37	24.61
ENSMUSG00000017288.9	protein_coding	Vps53	11.89	6.12	10.99	14.18	11.26	14.84	14.95	11.64	15.25
ENSMUSG00000017291.7	protein_coding	Taok1	18.28	17.03	19.51	17.89	23.93	21.69	21.86	27.75	23.42
ENSMUSG00000017299.7	protein_coding	Dnttip1	17.64	14.23	16.27	15.65	18.79	15.27	15.48	16.11	15.75
ENSMUSG00000017300.9	protein_coding	Tnnc2	0.37	0.17	0.05	0.06	0	0	0.06	0.05	0
ENSMUSG00000017307.9	protein_coding	Acot8	9.65	6.85	8.95	8.96	9.3	10.79	10.12	10.78	9.83
ENSMUSG00000017309.5	protein_coding	Cd300lg	0.02	0	0	0.01	0	0	0.03	0	0.01
ENSMUSG00000017310.7	protein_coding	Spint4	0	0	0	0	0	0	0	0	0
ENSMUSG00000017311.8	protein_coding	Pyy	0	0	0	0	0	0	0	0	0
ENSMUSG00000017314.6	protein_coding	Mpp2	3.15	2.73	3.26	2.35	2.38	3.19	2.49	3.21	3.04
ENSMUSG00000017316.6	protein_coding	Ppy	0	0	0	0.08	0	0	0	0	0
ENSMUSG00000017344.4	protein_coding	Vtn	0.22	0	0.08	0.05	0.03	0.07	0	0.03	0
ENSMUSG00000017376.8	protein_coding	Nlk	6.46	6.78	7.48	7.22	10.13	9.83	8.99	11.06	10.83
ENSMUSG00000017386.4	protein_coding	Traf4	17.88	16.97	23.55	23.67	25.39	35.71	26.98	29.79	36.6
ENSMUSG00000017390.9	protein_coding	Aldoc	1.66	3.86	2.05	1.41	4.07	2.62	1.84	6.21	3.25
ENSMUSG00000017400.4	protein_coding	Stac2	0.94	0.69	1.16	1.11	1.09	0.8	0.92	1.67	0.44
ENSMUSG00000017404.6	protein_coding	Rpl19	794.69	945.6	706.42	1203.1	1114.35	1068.28	1262.8	1245.41	1288.1
ENSMUSG00000017405.8	protein_coding	Nek8	6.66	4.89	9.24	8.01	8.61	10.89	7	7.14	13.32
ENSMUSG00000017412.8	protein_coding	Cacnb4	0.08	0.06	0.56	0.09	0.04	0.55	0.05	0.04	0.71
ENSMUSG00000017417.8	protein_coding	Plxdc1	0.24	0.05	0.16	0.2	0.1	0.11	0.14	0.11	0.08
ENSMUSG00000017418.7	protein_coding	Arl5b	5.5	6.79	6.8	5.67	7.1	6.05	6.31	7.33	7.08
ENSMUSG00000017421.10	protein_coding	Zfp207	88.6	86.52	94.33	94.76	109.81	100.6	107.49	119.92	124.51
ENSMUSG00000017428.9	protein_coding	Psmd11	21.99	23.92	23.76	26.85	30.4	25.79	30.39	36.8	31.19
ENSMUSG00000017446.7	protein_coding	C1qtnf1	5.88	2.73	4.31	4.41	2.8	3.57	3.95	4.75	3.78
ENSMUSG00000017453.4	protein_coding	Pipox	0.04	0	0.09	0.07	0.04	0.09	0	0	0.06
ENSMUSG00000017466.3	protein_coding	Timp2	201.66	77.45	170.8	232.37	142.68	228.57	235.41	154.57	235.27
ENSMUSG00000017478.7	protein_coding	Zc3h18	30.34	27.19	29.41	23.5	27.82	26.3	26.11	26.04	28.34
ENSMUSG00000017485.4	protein_coding	Top2b	26.88	19.11	26.89	27	25.51	26.45	31.58	27.16	30.32
ENSMUSG00000017491.7	protein_coding	Rarb	1.35	3.22	4.05	0.85	6.21	10.95	1.22	8.08	10.65
ENSMUSG00000017493.5	protein_coding	Igfbp4	189.55	99.78	167.7	35.18	42.65	45.55	56.74	71.28	32.99
ENSMUSG00000017499.9	protein_coding	Cdc6	18.97	20.34	19.26	23.98	27.99	25.46	26.94	30.24	23.81
ENSMUSG00000017548.9	protein_coding	Suz12	24.76	29.51	28.44	23.82	36.2	25.71	28.34	37.15	27.85
ENSMUSG00000017550.7	protein_coding	Atad5	8.3	7.24	8.82	9.2	10.83	9.48	9.81	10.37	9.51
ENSMUSG00000017561.9	protein_coding	Crlf3	14.99	16.4	15.52	18.85	20.37	21.36	20.17	21.86	21.89
ENSMUSG00000017588.2	protein_coding	Krt27	0	0.02	0	0	0	0	0	0	0
ENSMUSG00000017607.3	protein_coding	Tns4	0.25	0.89	0.58	0.09	0.33	0.2	0.23	0.29	0.13
ENSMUSG00000017615.5	protein_coding	Tnfaip1	21.69	16.47	25.3	29.89	25.73	34.09	32.36	28.45	40.21
ENSMUSG00000017631.10	protein_coding	Abr	19.01	15.65	16.45	15.9	15.88	15.31	15.74	16.44	13.04
ENSMUSG00000017639.6	protein_coding	Rab11fip4	0.18	0.06	0.24	0.08	0.09	0.15	0.08	0.06	0.08
ENSMUSG00000017652.8	protein_coding	Cd40	0.03	0.06	0.06	0	0.09	0	0.04	0.06	0
ENSMUSG00000017664.10	protein_coding	Slc35c2	14.4	14.39	17.24	14.33	17.39	15.72	14.75	14.56	16.54
ENSMUSG00000017667.9	protein_coding	Zfp334	5.38	4.79	5.13	4.58	5.18	5.44	4.95	5.48	4.98
ENSMUSG00000017670.10	protein_coding	Elmo2	31.81	21.83	35.26	30.38	24.87	33.3	31.75	26.69	31.71
ENSMUSG00000017677.5	protein_coding	Wsb1	64.85	66.62	76.37	60.61	77.92	78.72	68.58	80.75	87.46
ENSMUSG00000017679.10	protein_coding	Ttpal	20.67	20.84	20.7	17.48	20.78	19.43	19.2	23.12	20.15
ENSMUSG00000017686.10	protein_coding	Rhot1	17.81	17.66	20.12	22.28	23.44	24.43	21.86	23.64	23.7
ENSMUSG00000017688.8	protein_coding	Hnf4g	0	0	0	0	0	0	0	0	0.02
ENSMUSG00000017692.8	protein_coding	Rhbdl3	5.6	1.92	5.18	5.36	3.57	5.98	5.34	3.3	5.89
ENSMUSG00000017697.3	protein_coding	Ada	15.44	9.21	9.58	11.51	10.99	8.62	12.46	13.26	9.61
ENSMUSG00000017707.8	protein_coding	Serinc3	113.14	154.5	112.57	88.48	163.93	97.47	96.4	157.79	76.06
ENSMUSG00000017713.8	protein_coding	Tha1	0.8	0.77	0.87	0.6	0.98	0.76	1.01	0.96	0.9
ENSMUSG00000017715.5	protein_coding	Pgs1	31.36	33.29	29.34	33.14	42.91	34.74	41.7	50.14	38.21
ENSMUSG00000017716.8	protein_coding	Birc5	59.98	53.06	66.92	76.36	68.2	70.31	78.77	85.51	88.9
ENSMUSG00000017718.8	protein_coding	Afmid	4.27	2.77	4.36	3.45	4.4	6.15	3.32	3.92	5.57
ENSMUSG00000017720.2	protein_coding	Trp53tg5	0.14	0.09	0.22	0	0.03	0.09	0.08	0.03	0.08
ENSMUSG00000017721.8	protein_coding	Pigt	10.15	8.06	12.18	8.96	11.65	12.02	11.08	12.59	14.51
ENSMUSG00000017723.5	protein_coding	Wfdc2	0	0.29	0.11	0.09	0.1	0.26	0	0.43	0.38
ENSMUSG00000017724.8	protein_coding	Etv4	11.93	16.27	9.94	10.64	20.8	11.63	15.93	22.9	12.44
ENSMUSG00000017733.4	protein_coding	Spinlw1	0	0	0	0	0	0	0	0	0
ENSMUSG00000017734.9	protein_coding	Dbndd2	8.95	8.25	11.11	15.61	14.6	14.47	14.12	13.48	16.02
ENSMUSG00000017737.2	protein_coding	Mmp9	0.57	0.52	2.37	1.35	0.5	1.55	0.88	0.56	1.76
ENSMUSG00000017740.9	protein_coding	Slc12a5	0.33	0.27	0.44	0.34	0.29	0.35	0.25	0.37	0.43
ENSMUSG00000017747.7	protein_coding	Ghdc	4.43	3.69	6.69	6.32	6.37	8.85	5.51	5.91	9.99
ENSMUSG00000017754.7	protein_coding	Pltp	16.35	3.66	18.77	20.73	7.69	17.77	15.16	4.33	15.64
ENSMUSG00000017756.7	protein_coding	Slc12a7	5.27	4.14	3.53	3.13	3.86	2.44	3.56	3.93	2.79
ENSMUSG00000017760.9	protein_coding	Ctsa	301	153.66	306.48	261.06	237.56	253.96	235.49	184.07	223.46
ENSMUSG00000017764.2	protein_coding	Zswim1	3.66	2.93	4.04	4.33	3.82	4.56	4.34	4.53	4.95
ENSMUSG00000017765.9	protein_coding	Slc12a4	37.96	41.67	43.25	30.76	38.48	41.23	36.93	38.65	42.88
ENSMUSG00000017767.3	protein_coding	1700020C07Rik	0.43	0.15	0.36	0.28	0.11	0.19	0.23	0.16	0.31
ENSMUSG00000017774.12	protein_coding	Myo1c	72.19	50.9	64.19	79.67	76.22	76.66	93.14	80.44	93.1
ENSMUSG00000017776.8	protein_coding	Crk	38.97	39.91	43.05	45.72	52.06	51.06	50.08	54.01	52.72
ENSMUSG00000017778.8	protein_coding	Cox7c	152.58	150.64	183.29	182.51	153.87	159.99	172.45	178.16	210.69
ENSMUSG00000017781.10	protein_coding	Pitpna	34.61	34.48	37.36	41.97	46.54	43.3	45.35	46.44	46.67
ENSMUSG00000017801.9	protein_coding	Mlx	26.5	30.92	30.7	32.9	34.57	36.32	28.99	35.96	34.91
ENSMUSG00000017802.8	protein_coding	Fam134c	17.93	13.97	20.07	21.71	22.99	25.82	22.02	22.71	26.02
ENSMUSG00000017817.4	protein_coding	Jph2	1.88	0.43	1.97	1.39	1	2.32	1.95	1.38	2.88
ENSMUSG00000017830.8	protein_coding	Dhx58	17.9	24.59	3.55	8.55	47.38	3.44	8.84	24.52	2.86
ENSMUSG00000017831.7	protein_coding	Rab5a	25.15	33.69	29.19	29.42	36.72	32.1	34.03	42.87	34.43
ENSMUSG00000017832.2	protein_coding	Hspb9	0.49	0.58	0.31	0.35	0.52	0.68	0.6	0.64	0.79
ENSMUSG00000017837.6	protein_coding	Nkiras2	8.78	9.22	11.47	11.78	11.37	14.83	12.02	12.42	14.34
ENSMUSG00000017843.6	protein_coding	Ppp2r5c	29.05	25.95	31.63	30.91	24.75	33.06	31.52	31.06	38.52
ENSMUSG00000017858.6	protein_coding	Ift52	10.19	8.81	10.8	10.82	10.57	12.37	11.71	11.44	12.23
ENSMUSG00000017861.5	protein_coding	Mybl2	12.06	14.99	11.7	11.75	14.55	10.23	14.84	15.41	13.16
ENSMUSG00000017868.9	protein_coding	Sgk2	0.02	0.02	0.01	0	0.01	0	0	0.01	0
ENSMUSG00000017897.11	protein_coding	Eya2	0	0	0.03	0	0	0.07	0	0	0.01
ENSMUSG00000017914.7	protein_coding	BC034902	0	0	0	0.02	0	0	0	0	0
ENSMUSG00000017922.6	protein_coding	Prl3c1	0	0	0	0	0	0	0	0	0
ENSMUSG00000017929.7	protein_coding	B4galt5	52.7	71.82	39.07	34.54	75.56	26.09	40.34	70	28.34
ENSMUSG00000017943.9	protein_coding	Gdap1l1	0.15	0.72	0.21	0.26	0.56	0.07	0.17	0.12	0.12
ENSMUSG00000017950.9	protein_coding	Hnf4a	0	0	0	0	0	0	0	0	0.02
ENSMUSG00000017969.7	protein_coding	Ptgis	10.54	10.1	9.28	10.44	12.84	10.76	9.82	11.91	10.82
ENSMUSG00000017978.10	protein_coding	Cadps2	0.01	0.02	0	0	0	0.02	0	0.01	0.01
ENSMUSG00000017999.9	protein_coding	Ddx27	25.05	28.44	24.18	24.97	32.04	25.7	31.73	31.1	30.13
ENSMUSG00000018001.11	protein_coding	Cyth3	53.21	33.46	61.74	39.99	46.19	52.61	42.87	40.07	38.89
ENSMUSG00000018008.6	protein_coding	Cyth4	0.01	0.06	0.03	0.03	0.04	0.02	0.02	0.05	0
ENSMUSG00000018012.5	protein_coding	Rac3	2.53	2.6	8.56	2.54	1.75	5.71	2.56	3.07	7.9
ENSMUSG00000018040.3	protein_coding	Rrp7a	30.84	31.19	30.87	36.63	36.61	40.55	46.7	48.49	49.62
ENSMUSG00000018042.10	protein_coding	Cyb5r3	120.65	84.16	140.6	127.5	115.47	137.58	135.91	126.73	151.56
ENSMUSG00000018068.7	protein_coding	Ints2	10.82	10.47	12.25	12.25	12.39	15.45	13.46	15.17	16.33
ENSMUSG00000018076.8	protein_coding	Med13l	22.04	14.03	17.11	14.37	16.89	17.07	17.56	19.86	16.79
ENSMUSG00000018102.4	protein_coding	Hist1h2bc	219.54	200.87	230.19	236.33	211.65	199.18	267.49	269.16	234.91
ENSMUSG00000018126.8	protein_coding	Baiap2l2	1.44	0.28	1.53	1.47	0.55	1.16	0.82	0.58	0.39
ENSMUSG00000018143.4	protein_coding	Mafk	11.36	9.12	9.87	10.49	11.28	10.15	11.85	9.71	10.57
ENSMUSG00000018160.9	protein_coding	Med1	11.28	12.83	12.9	14.04	16.92	15.29	16.39	18.34	16.15
ENSMUSG00000018166.8	protein_coding	Erbb3	0.45	0.3	0.18	0.22	0.27	0.22	0.28	0.32	0.29
ENSMUSG00000018167.4	protein_coding	Stard3	13.66	15.1	16.41	17.42	25.57	23.57	19.11	23.05	21.61
ENSMUSG00000018168.8	protein_coding	Ikzf3	0	0	0	0	0	0	0	0.01	0
ENSMUSG00000018169.6	protein_coding	Mfng	0.05	0.01	0.03	0.01	0.1	0.01	0	0.05	0
ENSMUSG00000018171.3	protein_coding	Vmp1	115.02	128.3	129.86	140.42	178.52	134.82	148.43	164.78	142.92
ENSMUSG00000018189.6	protein_coding	Uchl5	11.83	13.16	12.81	11.28	11.58	10.24	12.07	13.25	11.82
ENSMUSG00000018196.11	protein_coding	Glrx2	8.6	7.68	10.79	12.03	9.04	12.77	12.11	11.34	14.17
ENSMUSG00000018199.8	protein_coding	Trove2	8.98	7.51	9.67	7.71	9.03	9.2	8.77	10	8.96
ENSMUSG00000018209.9	protein_coding	Stk4	11.72	10.1	12.14	10.99	12.55	12.42	12.24	13.73	13.9
ENSMUSG00000018211.6	protein_coding	Wfdc15b	0	0	0	0	0	0	0	0	0
ENSMUSG00000018217.6	protein_coding	Pmp22	86.22	47.24	70.29	58.29	34.96	34.94	42.73	37.61	30.76
ENSMUSG00000018238.6	protein_coding	Gdf9	0.26	0.2	0.44	0.5	0.19	0.53	0.21	0.32	0.78
ENSMUSG00000018239.3	protein_coding	Zcchc10	3.53	2.37	2.31	3.4	3.55	4.12	3.83	3.32	4.75
ENSMUSG00000018259.6	protein_coding	Prl8a2	0	0	0	0	0	0	0	0	0
ENSMUSG00000018263.8	protein_coding	Tbx5	0	0	0	0	0	0.01	0	0	0
ENSMUSG00000018286.6	protein_coding	Psmb6	146.77	143.08	162.55	201.48	206.07	228.08	223.92	242.37	253.99
ENSMUSG00000018287.6	protein_coding	Spag7	21.62	22.69	25.39	24.77	25.55	25.28	24.58	27.71	31.14
ENSMUSG00000018293.3	protein_coding	Pfn1	296.7	262.45	301.32	417.35	341.51	437.25	503.63	434.67	570.46
ENSMUSG00000018322.4	protein_coding	Tomm34	17.65	12.88	14.04	16.56	17.15	15.85	17.66	17.81	18.18
ENSMUSG00000018326.3	protein_coding	Ywhab	48.1	40.14	45.43	48.5	45.74	43.91	46.82	47.67	46.92
ENSMUSG00000018334.9	protein_coding	Ksr1	15.55	10.01	15.53	11.16	13.16	14.49	15.86	19.75	13.82
ENSMUSG00000018339.5	protein_coding	Gpx3	1.85	0.51	0.86	0.76	0.57	1.53	0.49	1.65	0.86
ENSMUSG00000018340.7	protein_coding	Anxa6	37.43	24.93	49	54.12	36.07	72.2	60.96	59.67	84.03
ENSMUSG00000018341.6	protein_coding	Il12rb2	1.01	1.11	1.29	0.87	1.19	1.04	1.36	1.07	1.25
ENSMUSG00000018347.9	protein_coding	Zkscan6	5.51	5.37	5.39	7.11	6.72	7.81	7.14	7.69	7.63
ENSMUSG00000018362.7	protein_coding	Kpna2	97.99	109.66	114.89	122.05	113.74	117.59	141.3	164.37	154.35
ENSMUSG00000018363.10	protein_coding	Smurf2	23.94	17.47	23.97	24.16	23.25	27.91	25.79	24.51	30.97
ENSMUSG00000018372.7	protein_coding	Ccdc45	9.5	8.65	10.5	9.86	11.45	11.82	10.79	13.01	13.71
ENSMUSG00000018377.4	protein_coding	Vezf1	13.49	10.17	13.77	14.7	13.89	17.72	15.85	15.69	17.96
ENSMUSG00000018378.6	protein_coding	Cuedc1	3.89	3.6	4.52	4.64	4.83	7.01	4.99	4.7	7.61
ENSMUSG00000018379.11	protein_coding	Srsf1	152.24	154.91	156.47	145.75	184.59	162.9	165.51	194.15	194.88
ENSMUSG00000018381.8	protein_coding	Abi3	0.81	2.66	1.36	0.82	3.18	1.35	1.44	3.81	1.05
ENSMUSG00000018387.6	protein_coding	Shroom1	1.04	0.98	0.93	0.82	0.69	1.69	0.66	0.83	1.33
ENSMUSG00000018395.12	protein_coding	Kif3a	12	9.25	11.62	9.85	11.06	12.33	10.48	12.7	12.04
ENSMUSG00000018398.12	protein_coding	2008-09-01	33.47	22.11	28.11	33.5	29.38	26.69	28.74	24.9	28.74
ENSMUSG00000018401.10	protein_coding	Mtmr4	16.63	11.36	18.26	18.42	15.99	21.93	20.24	19.92	23.51
ENSMUSG00000018405.7	protein_coding	Mrm1	3.13	2.2	3.72	3.44	4.95	5.05	2.83	5.89	3.28
ENSMUSG00000018411.10	protein_coding	Mapt	0.22	0.11	0.2	0.13	0.21	0.19	0.13	0.13	0.19
ENSMUSG00000018412.9	protein_coding	1700081L11Rik	16.79	14.15	17.3	17.04	18.37	20.97	19.74	18.09	21.92
ENSMUSG00000018415.8	protein_coding	4933439F18Rik	8.55	9.06	8.7	7.43	9.1	7.9	7.83	8.49	7.61
ENSMUSG00000018417.8	protein_coding	Myo1b	12.93	25.2	15.72	14.3	22.44	18.54	17.34	27.31	19.23
ENSMUSG00000018425.10	protein_coding	Dhx40	22.67	20.35	24.8	24.86	25.66	29.42	29.17	30.74	28.79
ENSMUSG00000018427.7	protein_coding	Ypel2	2.79	1.74	3.26	3.2	2.82	3.87	3.41	3.31	3.79
ENSMUSG00000018428.8	protein_coding	Akap1	14.25	12.92	15.73	14.58	14.47	15.72	17.68	14.15	19.02
ENSMUSG00000018433.8	protein_coding	Nol11	14.83	15.88	16.03	21.44	21.5	21.47	25.25	25.12	26.52
ENSMUSG00000018442.7	protein_coding	Derl2	11.55	12.32	12.68	14.61	16.47	15.83	17.05	17.75	18.51
ENSMUSG00000018446.7	protein_coding	C1qbp	41.64	50.75	32.21	43.78	52.18	38.9	60.33	61.51	50.67
ENSMUSG00000018449.5	protein_coding	Rpain	35.48	29.47	37.95	44.18	54.04	47.57	39.9	44.01	43.9
ENSMUSG00000018451.5	processed_transcript	6330403K07Rik	0.87	0.32	1.56	0.67	0.7	2.05	0.79	0.58	1.35
ENSMUSG00000018459.9	protein_coding	Slc13a3	0	0.02	0.01	0.02	0.01	0.03	0.01	0	0.14
ENSMUSG00000018470.2	protein_coding	Kcnab3	2.03	1.13	2.78	3.04	2.9	4.67	1.99	2	4.15
ENSMUSG00000018474.10	protein_coding	Chd3	23.45	26.07	29.12	25.14	34.46	31.17	36.52	46.05	40.77
ENSMUSG00000018476.7	protein_coding	Kdm6b	1.49	1.05	1.58	1.01	1.73	1.89	1.48	1.98	2.62
ENSMUSG00000018479.6	protein_coding	1700125H20Rik	0.1	0	0.19	0.14	0.09	0	0.06	0.15	0.06
ENSMUSG00000018481.9	protein_coding	Appbp2	12.38	10.55	12.67	13.85	14.68	16.51	15.56	17.44	18.16
ENSMUSG00000018486.2	protein_coding	Wnt9b	0	0.01	0	0	0.01	0.01	0	0	0
ENSMUSG00000018500.2	protein_coding	Adora2b	4.7	4.1	3.68	5.3	7.67	7.36	5.13	9.49	10.26
ENSMUSG00000018501.10	protein_coding	Ncor1	62.59	54.35	66.1	55.8	67.59	64.28	62.58	71.93	71.53
ENSMUSG00000018507.10	protein_coding	Trpv2	0.48	0.35	0.23	0.77	0.42	0.41	1.03	0.24	0.48
ENSMUSG00000018509.2	protein_coding	Cenpv	9.98	9.22	9.06	10.94	8.51	7.77	8.41	9.21	7.05
ENSMUSG00000018537.9	protein_coding	Pcgf2	5.97	3.56	5.27	5.27	5.31	6.88	6.99	6.52	6.62
ENSMUSG00000018541.4	protein_coding	Cwc25	7.39	6.3	7.57	9.06	8.64	10.01	8.96	9.2	10.71
ENSMUSG00000018543.8	protein_coding	1700001P01Rik	0.29	0.1	0.11	0.38	0.2	0.15	0.19	0.17	0.21
ENSMUSG00000018547.8	protein_coding	Pip4k2b	14.39	10.17	14.99	16.81	16.51	19.18	18.81	16.76	20.97
ENSMUSG00000018548.8	protein_coding	Trim37	26.88	18.48	25.61	26.72	29.7	24.62	28.52	24.5	26.5
ENSMUSG00000018554.6	protein_coding	Ybx2	0.16	0.07	0.3	0.05	0.09	0.21	0.06	0	0.1
ENSMUSG00000018559.9	protein_coding	Ctdnep1	23.4	21.69	23.81	19.52	27.21	23.45	23.2	26.97	22.54
ENSMUSG00000018565.10	protein_coding	Rai12	28.72	33.42	31.87	42.03	43.33	43.54	42.3	45.47	48.77
ENSMUSG00000018566.7	protein_coding	Slc2a4	0.83	0.33	2.09	1.12	0.69	3.13	1.05	1.41	2.29
ENSMUSG00000018567.8	protein_coding	Gabarap	259.25	163.65	276.73	316.99	248.73	298.16	279.72	224.32	300.41
ENSMUSG00000018569.6	protein_coding	Cldn7	0.17	0.05	0.05	0	0.2	0.13	0.07	0.05	0.35
ENSMUSG00000018570.10	protein_coding	2810408A11Rik	1.28	0.61	1.43	2.08	1.04	1.86	1.85	1.21	2.54
ENSMUSG00000018572.4	protein_coding	Phf23	32.07	31.17	31.51	36.31	34.76	35.11	35.11	36.74	36.21
ENSMUSG00000018574.8	protein_coding	Acadvl	29.73	24.82	41.44	40.82	37.57	59.02	40.2	44.36	58.41
ENSMUSG00000018581.7	protein_coding	Dnahc11	0	0	0	0	0	0	0	0	0
ENSMUSG00000018583.4	protein_coding	G3bp1	84.83	87.75	83.09	104.49	107.74	109.7	126.12	124.76	127.22
ENSMUSG00000018585.9	protein_coding	Atox1	109.11	103.8	142.65	150.76	127.13	168.21	145.33	155.41	182.46
ENSMUSG00000018589.8	protein_coding	Glra2	0	0	0	0	0	0	0	0	0
ENSMUSG00000018593.6	protein_coding	Sparc	380.78	222.67	766.73	575.59	431.77	858.34	626.2	659.44	935.46
ENSMUSG00000018595.6	protein_coding	Glra4	0.16	0.02	0.07	0.03	0.07	0.15	0.02	0.04	0.06
ENSMUSG00000018599.5	protein_coding	Smcr7	6.99	4.1	7.58	6.58	6.45	9.09	6.53	6.92	8.07
ENSMUSG00000018604.11	protein_coding	Tbx3	0.56	2.82	0.5	0.61	0.87	0.44	0.42	0.65	0.56
ENSMUSG00000018620.2	protein_coding	Mmp20	0	0	0	0	0	0	0	0	0
ENSMUSG00000018623.8	protein_coding	Mmp7	0	0	0	0	0	0	0	0	0
ENSMUSG00000018634.9	protein_coding	Crhr1	0	0	0	0	0	0	0	0	0
ENSMUSG00000018648.9	protein_coding	Dusp14	6.59	2.98	7.75	10.43	5.65	14.89	10.9	8.76	18.92
ENSMUSG00000018651.7	protein_coding	Tada2a	11.47	10.5	11.34	11.93	13.08	13.46	12.88	13.59	14.34
ENSMUSG00000018654.10	protein_coding	Ikzf1	0.02	0	0.01	0	0.02	0	0.01	0.02	0.02
ENSMUSG00000018656.5	protein_coding	Fam115e	0.01	0.01	0.03	0.01	0	0.01	0.04	0.02	0.04
ENSMUSG00000018659.6	protein_coding	Pnpo	3.28	2.93	3.03	4.17	4.25	4.95	4.56	4.84	6.3
ENSMUSG00000018661.10	protein_coding	Cog1	13.73	10.42	14.69	16.38	16.17	19.56	17.72	17	20.82
ENSMUSG00000018666.7	protein_coding	Cbx1	32.03	31.85	37.29	37.15	40.43	43.68	37.87	41.95	43.18
ENSMUSG00000018669.8	protein_coding	Cdk5rap3	15.04	15.34	16.42	17.96	20.69	21.67	18.75	18.88	23.72
ENSMUSG00000018672.9	protein_coding	Copz2	32.01	25.68	45.5	42.92	32.39	47.57	37.18	28.71	49
ENSMUSG00000018677.3	protein_coding	Slc25a39	50.19	66.25	52.39	58.27	66	62.74	65.48	57.98	69.03
ENSMUSG00000018678.6	protein_coding	Sp2	2.89	1.55	2.64	2.42	2.07	2.68	2.76	2.63	2.86
ENSMUSG00000018697.7	protein_coding	Aatf	15.52	16.94	13.57	18	19.59	16.28	20.17	18.91	21.43
ENSMUSG00000018698.7	protein_coding	Lhx1	0.06	0.07	0.36	0.01	0.01	0.11	0.02	0.03	0.01
ENSMUSG00000018707.7	protein_coding	Dync1h1	36.67	34.33	31.31	24.46	43.78	27.32	27.35	33.68	29.44
ENSMUSG00000018727.12	protein_coding	Cpsf4l	0.56	0.26	0.5	0.52	0.46	0.45	0.42	0.35	0.69
ENSMUSG00000018733.3	protein_coding	Pex12	3.58	2.88	4.24	4.37	4.71	5.48	4.71	4.27	5.72
ENSMUSG00000018736.8	protein_coding	Ndel1	50.56	51.21	57.13	53.56	60.71	59.01	52.2	55.41	57.05
ENSMUSG00000018740.8	protein_coding	Slc25a35	0.5	0.56	0.95	0.61	0.56	0.91	0.6	1.07	1.22
[truncated: 35,311 more rows]

## Sheet: All sigGenes_heatmap RNA-seq
	298861-PSC4-CM	298867-PSC5 II-CM	298864-PSC5 I-CM	298862-PSC4-CM+JAKi	298868-PSC5 II-CM+JAKi	298865-PSC5 I-CM+JAKi	298860-PSC4-MG-CM	298863-PSC5 I-MG-CM	298866-PSC5 II-MG-CM
Afg3l2	2.07758	0.555512	0.727933	-1.27338	-0.313632	-0.683414	-0.715754	-0.381976	0.00712933
Wdr74	2.04628	0.638646	0.700027	-1.17577	-0.275553	-0.67185	-0.938849	-0.350533	0.0275965
Farsb	2.07685	0.415633	0.698193	-1.31034	-0.125633	-0.764364	-0.798448	-0.259544	0.0676534
Ept1	2.15443	0.436819	0.592878	-1.27982	-0.309434	-0.918548	-0.402327	-0.277185	0.00319406
Ppan	2.00212	0.376786	0.751968	-1.36453	-0.226652	-1.01918	-0.553862	-0.094507	0.127856
Fau	2.02879	0.445361	0.457942	-1.42835	-0.0675608	-0.784356	-0.886007	0.159295	0.0748903
Gnl3	1.85192	0.69925	0.626395	-1.3391	0.0612176	-1.16626	-0.609971	-0.337653	0.214202
Polr3e	1.76643	0.783063	0.694403	-1.35096	-0.169041	-1.26643	-0.518776	-0.136416	0.197722
Rabggtb	1.95352	0.547375	0.768249	-0.886649	-0.0626443	-1.17333	-1.04613	-0.167964	0.0675821
Rpl5	2.04342	0.659616	0.408246	-1.49571	-0.0493625	-0.490347	-0.75903	-0.39958	0.0827506
Mak16	2.01583	0.584093	0.335628	-1.378	0.352424	-0.796405	-0.774127	-0.459873	0.120435
Gnl2	1.75572	0.914748	0.515815	-1.42282	0.341104	-0.620667	-0.930328	-0.644121	0.0905512
Tpt1	1.87041	0.491421	0.710689	-1.31733	-0.347938	-1.1128	-0.588701	-0.220555	0.514811
Nop58	1.81379	0.510362	0.628683	-1.44933	-0.00269414	-1.1018	-0.683921	-0.197831	0.482739
Gtpbp4	1.79106	0.518611	0.748728	-1.34923	-0.279259	-1.03416	-0.882174	0.0217068	0.464706
Hspd1	1.99312	0.462385	0.290959	-1.32202	-0.046377	-1.04902	-0.730358	-0.163157	0.564465
Timm8a1	1.92174	0.277155	0.49583	-1.40337	0.0421077	-1.00869	-0.735603	-0.224751	0.635583
Ddx31	1.86856	0.434847	0.397751	-1.45301	-0.129334	-1.0891	-0.722461	0.139993	0.552751
Trim27	1.97489	0.525542	0.532387	-1.24408	-0.386181	-0.850278	-0.844034	-0.281542	0.573299
Lyar	1.73454	0.845272	0.649505	-1.34026	-0.365509	-0.876195	-0.866445	-0.327874	0.546968
Hsp90aa1	1.83637	0.746071	0.297596	-1.52815	-0.458988	-0.557892	-0.866417	-0.0759913	0.607399
Far1	1.56788	1.21693	0.527798	-1.23628	-0.104754	-0.786813	-1.11849	-0.46359	0.397325
Ccnc	1.76165	1.13028	0.519737	-1.27424	-0.227859	-0.748708	-0.938531	-0.433025	0.210699
Ipo7	1.61098	0.868391	0.871188	-1.46188	-0.11096	-0.853459	-0.913178	-0.305468	0.294385
Thg1l	1.6348	1.02598	0.766581	-1.54186	-0.211624	-0.734116	-0.816242	-0.223331	0.099816
Trip13	1.34336	1.10581	0.763337	-1.42397	-0.44987	-0.759044	-1.05149	-0.192255	0.664121
Ptges3	1.4981	1.12666	0.374245	-1.57026	-0.158598	-0.895871	-0.852741	-0.0857131	0.564179
Nsun2	1.38023	0.863619	0.511867	-1.66218	-0.0530152	-1.06258	-0.763917	0.00571229	0.780254
Xrn2	1.56335	1.00841	0.521314	-1.40679	-0.260349	-1.33654	-0.529391	0.0511141	0.388884
Rrp1b	1.3571	1.26602	0.461684	-1.5314	-0.108999	-1.29277	-0.429676	-0.0739877	0.352027
Naa25	1.62659	0.895064	0.959202	-1.42711	-0.0280214	-0.864546	-0.688694	-0.598322	0.125837
Nol9	1.48719	0.882158	0.907695	-1.45505	0.203046	-0.969853	-0.801132	-0.581475	0.327416
Tmem5	1.74839	0.869675	0.709526	-1.26917	0.268019	-1.0879	-0.834127	-0.343044	-0.0613664
H2-Ke2	1.36951	1.23699	0.784922	-1.26436	0.000840822	-0.894933	-1.25625	0.0229748	0.000300447
Fcf1	1.43047	0.896975	0.973174	-1.29333	0.0503423	-1.23311	-0.9955	0.104038	0.0669342
Rpl13a	1.59043	0.646038	0.848048	-1.64837	-0.310074	-0.741673	-0.911487	0.284603	0.242483
Ppid	1.39781	0.710106	1.04107	-1.65338	0.023076	-0.590737	-1.15933	0.160723	0.0706537
Car13	1.24578	1.01115	0.891961	-1.67504	-0.126785	-1.00562	-0.824383	0.26021	0.222718
Ccdc101	1.35336	0.800358	1.11825	-1.66693	-0.240569	-0.509868	-0.963419	0.405648	-0.296833
Clic1	1.68563	0.814959	0.286278	-1.46354	-0.402157	-0.6029	-1.02908	0.821096	-0.110286
Gorasp2	2.04848	0.779738	0.339915	-0.863369	-0.518369	-0.863656	-1.13427	0.0307722	0.180762
Tnni3k	1.92238	0.917086	0.547739	-1.0673	-0.551837	-0.874367	-0.929116	-0.195976	0.231387
Timm10	2.09118	0.62833	0.473174	-0.821982	-0.441148	-1.08402	-0.904375	-0.238217	0.297057
Ssr3	2.19486	0.746772	0.120104	-0.808983	-0.425888	-0.600539	-1.12542	-0.317247	0.216341
Mrpl52	2.08775	0.576772	0.373883	-0.851276	-0.568748	-0.652174	-1.17896	-0.269665	0.482417
Cstf2	1.95125	0.89527	0.360542	-0.818827	-0.612775	-1.24577	-0.605339	-0.345537	0.421187
Vrk1	1.75437	1.11682	0.334923	-1.06769	-0.742141	-1.05699	-0.616872	-0.270917	0.548503
Itga5	1.9683	1.0385	0.442886	-0.904095	-0.781766	-0.970248	-0.619271	-0.290296	0.115984
Yars2	2.05743	0.917769	-0.0976114	-0.942804	-0.338516	-1.155	-0.665131	-0.122796	0.346664
Mcfd2	1.71546	1.31348	0.227289	-1.21543	-0.180334	-1.0091	-0.857913	0.0932166	-0.0866699
Psma4	1.71072	1.03438	0.466957	-0.850698	-0.297135	-1.40958	-0.94452	0.306808	-0.0169373
Ak2	1.93581	0.925437	0.16644	-1.12128	0.313092	-1.15103	-0.80914	-0.130413	-0.128921
Rpl18a	2.09384	0.0831852	0.355439	-1.59339	-0.183441	-0.787008	-0.423487	0.290102	0.16476
Rpl35a	2.25318	0.0933298	0.141949	-1.17372	-0.393167	-0.862059	-0.641644	0.428625	0.153513
Hist2h4	1.39866	1.06164	0.543184	-0.806802	-0.0710891	-1.70225	-0.948697	0.140274	0.385078
Mybl2	1.15963	1.06124	0.818851	-0.99259	-0.302675	-1.76277	-0.596149	0.0521654	0.562304
Htra2	1.40229	0.97084	1.05123	-0.866856	-0.227167	-1.58711	-0.811715	0.0714995	-0.00301373
Ugt1a6b	1.59978	1.10273	0.3314	-0.371045	-0.234904	-1.93645	-0.407799	-0.00762124	-0.0760905
Hat1	1.45456	1.08853	0.82305	-0.901657	-0.525019	-1.0952	-1.27846	0.16651	0.267691
Brix1	1.47971	0.81433	0.774136	-0.937289	-0.546273	-1.36582	-1.06398	0.331873	0.513307
Psmc2	1.69666	0.552528	0.883047	-0.540242	-0.647973	-1.24952	-1.15981	0.626255	-0.160944
Mif	1.85605	1.34112	0.463583	-0.880777	-0.435661	-0.868734	-0.667748	-0.560617	-0.247218
Gys1	1.80759	1.34274	0.567747	-0.912923	-0.689372	-0.803382	-0.550205	-0.554386	-0.207806
Cldn12	1.73076	1.20602	0.795895	-1.06237	-0.401991	-0.552229	-0.923846	-0.673649	-0.11859
Rcor2	1.65097	1.36163	0.720939	-1.10324	-0.333187	-0.714395	-0.752395	-0.690121	-0.14019
Spats2	1.58645	1.42247	0.754619	-1.16814	-0.790283	-0.614961	-0.572107	-0.260345	-0.357705
Slc16a3	1.61839	1.48487	0.770051	-0.893879	-0.583156	-0.62459	-0.65488	-0.532874	-0.58393
H3f3b	1.58122	1.34687	0.802161	-0.905151	-0.805424	-0.917553	-0.830856	-0.0846707	-0.186598
Nipa2	1.55884	1.21612	0.91182	-1.12472	-0.853761	-0.774052	-0.78818	-0.204744	0.058681
Plk4	1.71527	1.14339	0.871436	-0.673744	-0.741321	-1.01441	-0.891057	-0.405695	-0.00387732
Arih2	1.33304	1.2897	1.08993	-0.924824	-0.36544	-0.264873	-1.21584	-0.913031	-0.0286685
Zfp770	1.54478	1.21063	0.986214	-0.933182	-0.599817	-0.139228	-1.13156	-0.789257	-0.148574
Tmem48	1.41616	1.24935	1.13403	-0.679861	-0.781511	-0.525775	-1.18339	-0.630685	0.0016758
Acat2	1.49235	1.15278	0.930832	-0.711763	-0.172078	-0.648481	-1.50843	-0.585568	0.0503585
Myo1b	1.53637	1.27258	0.896455	-0.77066	-0.205546	-0.342776	-1.40621	-0.539923	-0.440291
Zwint	1.35584	1.19049	1.21142	-1.22975	-0.185134	-0.506876	-1.01993	-0.631859	-0.184201
Cdh10	1.52299	1.33383	0.916831	-1.05554	-0.160043	-0.590043	-1.08589	-0.48934	-0.392794
Isl1	1.1864	1.47273	1.2394	-1.00339	-0.387869	-0.540149	-0.967717	-0.464104	-0.535304
Mtdh	1.41979	1.05855	1.06182	-0.585882	0.00732699	-1.06469	-1.23911	-0.832678	0.174891
Ssb	1.46706	1.15416	0.989291	-0.53561	-0.408297	-1.11756	-1.21544	-0.555058	0.221454
Dhx15	1.64624	1.19307	0.641237	-0.683687	-0.283504	-1.21171	-0.943251	-0.671791	0.313401
Elovl6	1.69392	1.14041	0.738579	-0.577681	-0.116109	-1.02486	-0.804323	-1.1119	0.0619692
Psma3	1.66151	1.19993	0.57528	-1.01044	-0.0471026	-0.782616	-1.32087	-0.296361	0.0206711
Nup37	1.5787	1.35758	0.440218	-0.744189	0.0457488	-0.9128	-1.28732	-0.632912	0.154976
Cul1	1.44407	1.59951	0.636982	-0.736046	-0.209575	-0.893708	-1.06183	-0.649404	-0.129996
Srsf1	1.00432	1.5791	0.661329	-0.900547	0.189991	-1.3862	-0.99063	-0.464735	0.307377
Dram1	1.73266	1.22848	0.46257	-0.573788	0.393103	-1.08847	-0.915491	-0.634906	-0.604156
Lass4	1.43246	1.52318	0.519372	-0.557426	0.325107	-1.25118	-0.733714	-0.782224	-0.475578
Ak4	1.73213	1.36728	0.630623	-0.670194	-0.139584	-0.979177	-0.654891	-0.799813	-0.486377
Gapdh	1.53014	1.63298	0.099969	-1.10606	-0.0501117	-0.579964	-1.03574	-0.582075	0.090854
Pgam1	1.57978	1.66268	-0.203311	-1.06935	-0.0893571	-0.612178	-0.942422	-0.502733	0.176891
Pgk1	1.83065	1.43012	-0.101263	-1.01126	-0.196139	-0.757774	-0.931751	-0.297494	0.0349128
Ldha	1.64557	1.58595	0.0207019	-1.01881	-0.247825	-0.816628	-0.940107	-0.338219	0.109367
Eno1	1.57199	1.37702	-0.19918	-1.34607	0.0414313	-0.519765	-1.16848	-0.117572	0.360628
Stip1	1.91771	1.20228	0.128673	-0.957961	-0.243781	-0.893161	-0.868641	-0.523544	0.238418
Tfrc	1.78672	1.18285	0.022292	-1.31267	-0.088952	-0.630847	-0.92569	-0.475953	0.442248
Aldoa	1.50143	1.54887	0.307974	-1.19478	-0.102125	-0.454651	-1.22508	-0.320361	-0.0612726
Galk1	1.42156	1.6623	0.299567	-1.03338	-0.128819	-0.536917	-1.29443	-0.225372	-0.164515
Bsg	1.25473	1.6865	0.242477	-1.22816	0.0297892	-0.107274	-1.36721	-0.223535	-0.287316
Gpi1	1.2189	1.56447	0.671969	-1.20401	0.0876822	-0.246277	-1.32017	-0.553527	-0.219039
Jmjd6	1.10741	1.46229	0.462589	-1.32439	0.337244	-0.300342	-1.54382	-0.273472	0.0724938
Rps18	1.39226	0.617877	0.566284	-1.80795	-0.0583744	-0.733371	-1.00412	0.432354	0.595036
Rpl12	1.37705	0.624062	0.422782	-1.82462	-0.0579322	-0.8445	-0.882797	0.533124	0.652837
Rps12	1.55006	0.670355	0.378951	-1.72511	-0.094993	-0.74003	-0.977706	0.275075	0.663398
Rps20	1.59334	0.509216	0.328982	-1.84848	0.0564607	-0.773755	-0.796004	0.399266	0.530981
Rps24	1.66729	0.682394	0.323511	-1.68823	-0.166581	-0.869762	-0.804627	0.398906	0.457096
Rplp2	1.56005	0.599012	0.0988424	-1.77013	-0.313081	-0.676981	-0.774237	0.421706	0.854818
Sqrdl	1.44023	0.453474	0.395465	-1.60892	-0.126345	-1.32447	-0.52345	0.430613	0.863403
U2af1	1.08729	0.951923	0.458412	-1.51384	-0.576299	-1.12378	-0.791137	0.591351	0.916077
Ptpla	1.19791	0.657996	0.712443	-1.47225	-0.268382	-0.862715	-1.30422	0.523101	0.816119
Wdr43	1.25104	0.738146	0.68324	-1.62819	0.252345	-1.08445	-0.88014	-0.18308	0.851086
Dis3	1.32478	0.849702	0.588533	-1.55734	0.218137	-0.96002	-0.858399	-0.498167	0.892773
Heatr1	1.06564	0.828458	0.531685	-1.84537	-0.0222847	-1.00754	-0.623308	0.031152	1.04157
C1qbp	0.997381	1.0113	0.581196	-1.78163	0.0757098	-0.893367	-0.800345	-0.186006	0.995762
Tcof1	0.841429	0.781235	1.14638	-1.80083	-0.116842	-0.870427	-0.679592	-0.219587	0.918227
Ddx27	1.14856	0.644148	1.09763	-1.5198	-0.212063	-0.848443	-0.888754	-0.427971	1.00669
Apex1	0.979463	0.850512	0.911252	-1.61148	-0.252992	-1.06382	-0.848718	0.050162	0.985627
Trmt6	1.15371	0.950455	0.955997	-1.28058	-0.522166	-1.12551	-0.937662	-0.0811405	0.886891
Cse1l	0.726091	1.69069	0.297697	-1.29587	-0.437904	-1.03025	-0.924854	0.124454	0.849954
Tra2a	1.0713	1.63085	0.316844	-1.04954	-0.335254	-1.30592	-0.971093	0.213574	0.429233
Fkbp1a	0.763083	1.3103	0.497101	-1.62784	-0.00771081	-1.34191	-0.61952	0.298273	0.728214
Psmd14	0.595104	1.50602	0.711004	-1.15746	-0.0704948	-1.10766	-1.35183	0.225425	0.649896
Igfbp3	0.600922	1.15369	1.00478	-1.49063	0.112947	-1.07966	-1.20175	0.293396	0.606307
Fam19a2	0.856489	1.17754	0.764319	-0.947377	-0.547975	-0.976856	-1.53898	0.465634	0.747211
Ppp4r1	1.27681	0.751985	0.812698	-1.47446	-0.81198	-1.16521	-0.472113	0.272635	0.809635
Luc7l	1.28946	0.579341	0.945124	-1.3338	-0.694532	-1.35653	-0.555446	0.384388	0.741996
Utp15	1.2432	0.518514	0.975551	-1.51323	-0.997863	-1.11399	-0.246712	0.529197	0.605335
Zfp259	1.612	0.336964	0.765238	-1.85867	-0.477344	-0.709272	-0.446926	0.304236	0.47377
Slc19a1	1.47328	0.267642	0.58053	-1.75912	-0.815118	-0.792579	-0.246975	0.383863	0.908478
Pus1	1.72308	0.0774469	0.789063	-1.69009	-0.087104	-1.13335	-0.273307	0.260895	0.333359
Itga6	1.49041	0.427616	1.05142	-1.43091	-0.296927	-1.5182	-0.0260941	0.110895	0.191791
1500012F01Rik	1.97253	0.202611	0.628843	-1.17851	-0.591583	-1.37397	0.0581732	0.10309	0.178809
Cyp20a1	1.85435	0.260691	0.819914	-1.23473	-0.757176	-1.15813	-0.393593	0.449072	0.159598
Nup210	1.58723	0.209909	1.06621	-1.16926	-0.967433	-1.21103	-0.307549	0.642919	0.149001
Mrps2	1.3302	0.810955	0.778862	-0.841292	-0.567957	-1.54665	-0.788487	-0.127416	0.951777
Gm9781	1.037	0.479209	1.28944	-0.465378	-0.278017	-1.48762	-1.3455	-0.0717086	0.842583
Slc1a4	0.989397	0.0893409	1.46345	-1.83673	-0.280549	-0.515774	-0.798079	0.19845	0.690497
Rpl22l1	0.92232	0.287053	1.16208	-1.33	-0.613572	-1.26373	-0.658545	1.20754	0.286845
Tars	1.68944	0.801205	1.08842	-1.11126	-0.227095	-0.708646	-1.09459	-0.562787	0.125308
Eif2s2	1.6743	0.832874	0.984664	-1.08208	-0.105109	-0.950364	-1.09242	-0.463101	0.201244
Hsd17b12	1.75395	0.790301	1.05726	-0.80086	-0.332039	-0.823063	-1.276	-0.351794	-0.0177518
Eaf1	1.71596	0.802339	0.92673	-1.27613	-0.173452	-0.571233	-1.08332	-0.580522	0.239627
Alg8	1.6966	0.661704	1.01222	-1.29631	-0.282048	-0.529709	-1.08478	-0.550367	0.372695
Tmem20	1.60207	0.849173	1.06211	-1.16112	-0.343388	-0.74631	-0.902562	-0.763803	0.403832
Riok3	1.32021	1.03216	1.23056	-1.21768	-0.133345	-0.507951	-1.2563	-0.573842	0.106183
Bcat1	1.5256	0.892064	0.999081	-1.234	-0.127783	-0.508366	-1.33791	-0.471303	0.262616
Psmc6	1.3493	1.21028	0.883162	-1.18344	-0.251404	-0.461701	-1.42886	-0.382098	0.264757
Rcn1	1.32688	0.895461	1.32938	-0.868896	-0.489576	-0.49848	-1.52079	-0.309692	0.135709
Zc3h15	1.61009	0.76214	0.958244	-0.978141	-0.297972	-0.424008	-1.58159	-0.32487	0.276108
Tnfrsf12a	1.32445	0.856335	1.37946	-1.34038	-0.409766	-0.350954	-1.21411	-0.216998	-0.0280339
Pkn2	1.24457	0.79253	1.46331	-1.48242	-0.663048	-0.405533	-0.851394	-0.323203	0.22519
Recql4	1.60721	0.60709	1.42985	-0.954481	-0.766466	-0.616883	-0.974248	-0.411485	0.0794093
G6pc3	1.45646	0.944131	1.22179	-1.13951	-0.907792	-0.625044	-0.974408	-0.113437	0.13781
Msh6	1.68551	0.965437	0.907553	-1.25756	-0.801895	-0.171373	-1.05336	-0.171032	-0.103279
Ppp1r8	1.54603	0.815245	0.957656	-1.59308	-0.632939	-0.280417	-0.935023	-0.192829	0.315358
Acaca	1.26195	0.99406	1.37219	-1.11422	-0.0235111	-0.450363	-1.06966	-0.973349	0.00290071
Ppif	1.28543	0.734437	1.37879	-1.36197	0.152815	-0.374719	-1.04049	-0.890195	0.115906
Vars	1.34517	0.846653	1.10205	-1.40842	0.271785	-0.723355	-0.992256	-0.766852	0.325221
Ktn1	1.43114	0.817693	1.42417	-1.35511	-0.242347	-0.651662	-0.698956	-0.66574	-0.0591786
Ccdc76	1.42031	0.945933	1.25105	-1.25613	-0.129253	-0.692041	-0.772018	-0.912357	0.144503
Taf4b	1.51031	0.502548	1.3459	-1.44782	0.063999	-0.64988	-0.644504	-0.832902	0.15235
Nars	1.33629	0.5504	1.48752	-1.33601	-0.0614593	-0.673358	-1.15195	-0.31872	0.167273
Lars	1.43804	0.532013	1.4073	-1.31182	-0.0561161	-0.568536	-1.20578	-0.381845	0.146743
Hspa9	1.41911	0.526358	1.28472	-1.40839	-0.052924	-0.50851	-1.26166	-0.332418	0.333713
Derl1	1.60531	0.418201	1.35046	-1.13732	-0.703507	-0.530479	-1.15658	0.0269063	0.127006
Lass2	1.69015	0.582301	1.07099	-1.18594	-0.349893	-0.716435	-1.26247	0.143244	0.0280498
Gars	1.83872	0.52037	1.05137	-1.11365	-0.232338	-0.872796	-1.01426	-0.355635	0.178223
Xpot	1.78531	0.401622	1.20379	-1.1325	-0.250743	-0.719873	-0.999972	-0.529364	0.241731
Yars	1.73868	0.224948	1.40109	-1.02433	-0.323116	-0.679953	-1.05068	-0.46139	0.174756
Phgdh	1.64869	0.0925238	1.29113	-1.20228	-0.276312	-0.991889	-0.930488	-0.104492	0.47312
Sars	1.54408	-0.101879	1.61326	-1.10153	-0.110284	-0.481092	-1.23661	-0.12887	0.00291785
Scamp4	1.554	0.176725	1.4239	-1.37246	-0.129729	-0.20713	-1.21531	-0.314457	0.0844639
Art3	1.6055	0.3848	1.46052	-1.45828	-0.257764	-0.343048	-0.814736	-0.298432	-0.278563
Srprb	1.90422	0.57825	0.912027	-0.985963	-0.392045	-0.420064	-1.37112	-0.12122	-0.104089
Jagn1	1.94983	0.59589	0.686441	-1.06825	-0.317758	-0.479965	-1.36988	-0.104984	0.10868
Rer1	1.95291	0.776115	0.589934	-0.997948	-0.393822	-0.464928	-1.3501	0.0845054	-0.196669
Yrdc	1.96099	0.73326	0.588701	-1.1756	-0.0985439	-0.404533	-1.28216	-0.258725	-0.0633923
Gng5	1.84007	0.413971	0.828257	-0.832475	-0.293135	-0.78527	-1.517	0.163749	0.18183
Pla2g12a	1.8791	0.35142	1.07489	-0.762302	-0.0281907	-0.600212	-1.46457	-0.254031	-0.196112
Canx	1.01409	0.85567	1.22526	-1.28379	-0.0990969	-0.374487	-1.68441	0.0273927	0.319378
1810032O08Rik	1.21861	0.684974	1.19773	-1.59678	-0.209478	-0.346918	-1.32131	-0.0156758	0.388849
Utp18	1.11964	0.86174	1.06984	-1.55436	0.177709	-0.779277	-1.15721	-0.333227	0.595137
Cwc22	0.942921	1.20797	1.06386	-1.36952	0.0692289	-0.942726	-1.25046	-0.132957	0.411675
Hmga1	1.16631	0.739879	1.01681	-1.66059	0.351627	-0.274437	-1.36101	-0.342357	0.363772
Nop56	1.27975	0.804827	0.768398	-1.80985	0.206473	-0.666313	-1.06042	-0.0100123	0.487149
Psat1	1.46722	0.50392	0.95092	-1.38951	0.00604552	-0.62236	-1.35792	-0.242541	0.684237
Rpl34	1.6526	0.60797	0.587505	-1.55398	-0.0528108	-0.503986	-1.3107	0.295183	0.278216
Eef1e1	1.60335	0.822805	0.563438	-1.49699	0.102034	-0.573048	-1.3429	0.163884	0.157433
Rps3	1.44973	0.738793	0.568209	-1.78827	-0.0360162	-0.546737	-1.12242	0.357085	0.379632
Cirh1a	1.77427	0.758128	0.380105	-1.46296	0.126661	-0.73152	-1.04772	-0.300332	0.503372
Ebna1bp2	1.54349	0.729132	0.670021	-1.49059	0.15176	-0.934923	-1.05011	-0.223342	0.604557
Psmd4	1.08877	1.16041	1.04421	-1.09483	0.103913	0.0345348	-1.69832	-0.517823	-0.120869
Cdr2l	1.09421	1.33592	0.983905	-1.26196	0.0129853	-0.0689131	-1.47957	-0.499729	-0.116844
Vps54	0.954375	1.12051	1.13294	-1.07262	0.204404	0.00764075	-1.59606	-0.889479	0.138301
Foxk2	1.21032	1.13419	1.17808	-1.07642	-0.0133484	-0.120818	-1.45537	-0.746457	-0.110174
Rnmt	1.29192	1.18696	1.04028	-1.27371	0.0311604	-0.221756	-1.19261	-0.863181	0.000928008
Hapln4	1.49575	0.84262	1.06569	-1.41046	0.0346225	-0.0870263	-1.26969	-0.537388	-0.134116
Mars	1.19019	0.612867	1.22733	-1.08371	0.319109	-0.120514	-1.75133	-0.561642	0.167704
Mei4	1.06432	0.590735	1.49746	-0.941361	0.0906423	0.0440542	-1.7199	-0.648829	0.0228728
Tlk2	0.927435	0.650938	1.5964	-1.28136	0.264612	-0.123215	-1.37086	-0.744829	0.0808712
Spcs2	1.65413	0.705143	0.64053	-1.11353	0.263156	0.0249296	-1.68913	-0.437084	-0.0481459
Kif21b	1.5094	0.663636	0.831705	-0.909176	0.475176	-0.306692	-1.8276	-0.280467	-0.155976
Uba3	1.36758	0.929912	0.801167	-0.813447	0.237025	0.0466056	-1.90461	-0.497832	-0.166406
Dhdh	1.08728	0.959263	0.877911	-0.817373	0.317897	0.117077	-1.94537	-0.735133	0.138439
Tmem97	1.37296	1.06089	0.688838	-1.11721	0.187682	-0.590846	-1.65622	-0.235728	0.289625
Orc4	1.22524	1.05214	1.13567	-0.956661	-0.00240138	-0.886085	-1.54926	-0.0351042	0.0164733
Rab5a	0.989692	1.48765	0.831765	-0.945412	-0.269691	-0.30918	-1.70197	-0.318284	0.235434
Prelid2	0.858984	1.43308	0.843442	-1.07206	0.0637748	-0.315476	-1.80113	-0.00321376	-0.00739745
Nploc4	0.491788	1.34349	1.23015	-1.05818	-0.0141116	0.0420427	-1.66821	-0.667175	0.300205
Dnajc7	0.685427	1.19339	1.32779	-0.915586	0.000732905	0.092659	-1.73591	-0.693337	0.0448349
Tmem199	0.602312	1.02273	1.51842	-0.867747	0.0195218	-0.0999977	-1.84965	-0.316586	-0.0290042
Prpf4	1.21246	0.88362	1.0035	-1.88998	-0.249177	-0.478885	-0.847379	-0.0335643	0.399397
Lsm11	1.1452	1.03594	0.937337	-1.83879	-0.264974	-0.105347	-1.09727	-0.0683163	0.25622
Dph1	0.83146	1.1031	1.15376	-1.91497	0.0788445	-0.182563	-0.986817	-0.237333	0.154514
Nufip1	1.33134	1.24623	0.876283	-1.54119	-0.245816	-0.159575	-1.00666	-0.641921	0.141308
Flt4	0.968354	1.44972	0.945948	-1.85178	-0.085933	-0.202999	-0.533867	-0.525553	-0.163893
Smpdl3b	0.875751	1.12164	1.01419	-1.73479	0.470197	0.0605727	-1.21843	-0.130192	-0.458939
Slc38a1	1.38569	1.02974	1.33844	-1.23432	-0.789269	-0.588966	-0.442944	-0.733017	0.0346439
Tmem194	1.17356	0.980754	1.55292	-1.10403	-0.85665	-0.533579	-0.668408	-0.728811	0.184241
Cpsf6	1.04755	1.33153	1.31421	-1.18736	-0.845861	-0.60776	-0.650437	-0.650384	0.248515
Pigw	1.21854	1.24371	1.18617	-1.17068	-1.03032	-0.529383	-0.466952	-0.739968	0.288881
Mcm10	1.20053	1.02169	1.22921	-1.40168	-1.05515	-0.629437	-0.612954	-0.124342	0.372136
2610002D18Rik	1.25019	1.0593	0.970113	-1.56534	-0.891414	-0.541015	-0.642466	-0.243002	0.603625
Sec1	1.47465	0.831779	0.923136	-1.44951	-1.05273	-0.375929	-0.583861	-0.414244	0.646715
Cpsf2	0.944911	0.756252	1.38296	-1.72968	-0.606023	-0.839973	-0.470103	-0.0186183	0.580275
Bms1	1.04495	0.836177	1.47095	-1.52902	-0.691198	-0.701025	-0.383553	-0.56672	0.519434
Ttf2	1.23676	1.24419	1.13009	-1.30924	-0.516181	-0.748364	-1.04844	-0.0465419	0.0577263
Etv4	0.878901	1.42742	1.23207	-1.31182	-0.772001	-0.700421	-0.803125	-0.305944	0.35492
Ssrp1	1.21324	0.687816	1.36124	-1.25368	-0.614769	-0.647193	-1.15001	-0.261779	0.665127
Pus3	1.32938	0.80112	0.886279	-1.33702	-0.758638	-0.305384	-1.28447	-0.153264	0.821997
Rnf121	0.900813	0.779207	1.50627	-1.29658	-0.941518	0.115302	-1.24997	-0.182301	0.368777
Gapvd1	0.570539	1.43188	1.45046	-1.49342	-0.37819	-0.732891	-0.726409	-0.254406	0.132441
Pnpt1	0.394382	1.35138	1.42314	-1.77349	-0.289518	-0.543789	-0.626871	-0.158711	0.223475
Rad50	0.710419	0.786654	1.89338	-1.42544	-0.403395	-0.397343	-0.891525	-0.367774	0.0950243
Ap1g2	0.442228	0.855007	1.8274	-1.53872	-0.124348	-0.386089	-1.06096	-0.202293	0.187776
Ubr2	0.891658	1.19394	1.62713	-1.06161	-0.463445	-0.73548	-0.925719	-0.619346	0.0928664
Dcp2	0.680365	1.45796	1.54765	-1.20841	-0.20983	-0.450012	-0.866645	-0.705841	-0.245243
Polr1a	0.608547	1.16721	1.17705	-1.65608	-0.202656	-0.716457	-0.519609	-0.736706	0.878707
Polr3h	1.01301	1.10565	0.940142	-1.66603	-0.326652	-0.719504	-0.72299	-0.472829	0.849202
Aqr	0.663075	1.43844	0.919601	-1.74052	-0.304949	-0.875228	-0.508309	-0.251898	0.659788
Cebpz	0.638137	1.33892	1.06795	-1.40124	-0.37924	-0.754275	-1.1072	-0.239697	0.836644
Pgs1	0.234498	1.64834	1.00931	-1.51323	-0.3184	-0.525969	-0.935925	-0.340099	0.741471
Prpf40a	0.918597	1.69977	0.854372	-0.986868	-0.321217	-0.842417	-1.08601	-0.639136	0.402909
Naa16	1.07819	1.93344	0.490403	-0.902922	-0.309064	-0.740841	-0.864502	-0.799183	0.114472
Pvrl2	0.905846	1.739	0.936187	-1.22415	-0.165798	-0.350198	-0.81673	-0.980428	-0.0437254
Npepps	0.384506	2.25064	0.442138	-1.02195	-0.134649	-0.435468	-0.522644	-1.03024	0.0676725
Rbm27	0.36464	1.80786	1.01665	-1.11449	-0.64185	-0.519071	-0.343413	-1.1101	0.539773
Xpo1	0.419907	1.97933	0.849065	-1.0832	-0.76811	-0.722166	-0.89868	-0.0717658	0.295621
Cela1	0.532611	2.00939	0.536477	-1.62378	-0.27121	-0.587152	-0.567933	-0.0947371	0.0663374
Mcph1	1.15517	1.59153	0.560967	-1.38081	-0.62347	-0.598565	-0.615572	-0.66968	0.580434
Zfp7	1.02768	1.67195	0.742222	-1.39672	-0.606651	-0.599203	-0.680488	-0.550562	0.391772
Cux1	0.718372	1.8568	0.494127	-1.27957	-1.06691	-0.066932	-0.515553	-0.676943	0.53661
Fpgt	1.35931	1.48741	0.731388	-1.48738	-0.83648	-0.117991	-0.448803	-0.487423	-0.200039
Nhedc2	0.988673	1.73215	0.520947	-1.62707	-0.692105	0.0682104	-0.75869	-0.0233022	-0.208813
Pkm2	1.65311	1.44662	0.388534	-0.895028	-0.851594	-0.985165	-0.524537	-0.451151	0.219215
Hdac1	1.3304	1.74398	0.146915	-1.17613	-0.743976	-0.964803	-0.462933	-0.133013	0.259566
Cpne1	1.54682	1.47895	0.394877	-0.939287	-1.10507	-1.02182	-0.0396026	-0.338321	0.0234609
Gbx2	1.33071	1.56834	0.243675	-0.843843	-1.14751	-1.29124	0.0177601	0.00536146	0.116742
Timp1	1.66509	1.23483	-0.0226444	-1.19679	-0.770161	-1.25634	-0.00539005	0.0405393	0.310871
Naa15	0.692054	1.94452	0.324787	-1.22988	-0.451021	-1.29674	0.157379	-0.388452	0.247361
Ppp2r2a	0.957008	2.12786	0.158381	-1.06849	-0.550751	-0.791714	0.0541749	-0.621563	-0.264913
Has2	0.963448	1.62461	0.759737	-1.51709	-1.01842	-0.672555	-0.225002	-0.0276016	0.112868
Mapk11	1.2277	1.47472	0.848643	-1.33557	-0.691367	-1.03802	-0.496803	-0.0709542	0.0816457
Lpcat1	0.915523	1.27459	1.2115	-1.26292	-0.849469	-0.972781	-0.49752	0.611456	-0.430377
Ugt1a7c	1.23398	1.1877	-0.0105955	-1.5442	-0.907274	-0.999736	-0.0257327	0.91418	0.151678
Serpine1	0.881091	1.60619	0.559831	-1.91661	-0.1764	-0.548052	0.20672	-0.0883769	-0.524396
Pppde2	1.05063	1.40193	0.597744	-1.86448	-0.167086	-0.92814	0.322656	-0.302307	-0.11095
Klf12	1.58	0.842882	0.4282	-2.08167	0.0732488	-0.366968	-0.352854	-0.0146493	-0.108184
Edem1	1.55591	0.792214	1.00461	-0.803705	-0.914367	-1.45909	-0.346196	-0.228493	0.399109
Baz1a	1.57903	0.98049	0.82472	-0.82191	-0.892803	-1.46025	-0.304365	-0.237958	0.333051
Eif1a	1.59001	0.872952	0.984318	-1.05068	-0.501069	-1.44882	-0.181214	-0.463478	0.197986
4933424B01Rik	1.40677	1.02183	1.04008	-1.17222	-0.842255	-1.17041	-0.535366	-0.122702	0.374267
Rrp15	1.48248	0.919723	0.756437	-1.25622	-0.561285	-1.35802	-0.494423	-0.112871	0.624189
Hnrnpl	1.74281	0.733659	0.684237	-1.21699	-0.419653	-1.29211	-0.449921	-0.340055	0.558024
Cdv3	1.7805	0.66248	0.770027	-0.911419	-0.412123	-1.44855	-0.447027	-0.496598	0.502716
Mthfd1l	1.75202	0.833274	0.942833	-1.01735	-0.527637	-1.25407	-0.500698	-0.417718	0.189356
Dnajc2	1.84946	0.689979	0.874092	-0.919844	-0.655202	-1.12434	-0.723502	-0.36704	0.376397
Abcf2	1.86114	0.796983	0.79715	-1.01676	-0.689713	-0.765426	-0.755709	-0.649146	0.421484
Mphosph10	1.7803	0.932748	0.828517	-0.931865	-0.597274	-0.5648	-1.02681	-0.752206	0.331392
Ttc37	1.67629	0.788474	0.888274	-0.824939	-0.738241	-0.905406	-1.14186	-0.316868	0.574282
Acsl3	1.65893	0.976659	0.9765	-0.553237	-1.03115	-0.769576	-0.91563	-0.662124	0.319619
Atp1a1	1.30544	1.24198	0.950259	-0.834236	-1.11674	-0.819871	-0.578081	-0.74139	0.592637
Haus6	1.45166	1.18809	0.953583	-0.875512	-1.01377	-0.608755	-0.823196	-0.724405	0.452306
Gm10130	1.67973	0.778518	0.993589	-0.903276	-1.11368	-0.695632	-0.444729	-0.781281	0.48676
Rcl1	1.91152	0.748479	0.121974	-1.33466	-0.375082	-1.2126	-0.0642374	-0.31814	0.522735
2610024G14Rik	1.74422	0.698031	0.0531987	-1.07877	-0.746241	-1.16803	-0.316678	-0.2824	1.09666
B230314M03Rik	1.63594	0.596154	0.562704	-1.37885	-0.761843	-1.08289	0.16639	-0.552635	0.81503
Ube2cbp	2.00902	0.474495	0.0793139	-1.54536	-0.617993	-0.555044	-0.0907503	-0.431682	0.678006
Pabpc1	1.69101	1.17228	0.276736	-1.39712	-0.229424	-1.17864	0.106248	-0.526587	0.0855019
Il19	1.71978	1.28943	0.0746727	-1.34466	-0.643592	-0.761869	0.147099	-0.706326	0.225466
Urb2	1.60392	1.02454	0.264383	-1.0931	-0.133422	-1.06236	-0.165791	-1.17906	0.740879
Bbs12	1.69323	1.1631	0.907805	-0.959386	-0.878706	-0.853582	-0.320913	-0.102351	-0.649196
Lins	1.52181	1.06633	1.03831	-1.46187	-0.819179	-0.667675	-0.158412	-0.0936738	-0.425635
2010109K11Rik	1.96286	0.663793	0.802072	-1.23707	-0.852293	-0.698033	-0.0496252	-0.029639	-0.562065
Plaur	1.85835	0.933717	0.66704	-1.43354	-0.353813	-0.805087	-0.560662	-0.294823	-0.011184
Sox12	2.01494	0.658253	0.745395	-1.33349	-0.505888	-0.856127	-0.285423	-0.277079	-0.160581
Ndufa4l2	1.69092	1.08824	0.987921	-0.842515	-0.442664	-1.21711	-0.574086	-0.232927	-0.457781
Suv39h1	1.70228	0.846035	0.535275	-1.0333	-1.25714	-1.0787	0.33541	-0.320305	0.27044
Maff	1.58653	1.08861	0.652555	-1.09518	-1.32438	-0.868463	0.304332	-0.251448	-0.092559
Piwil2	1.93168	0.983231	0.39384	-0.953077	-1.08624	-0.971886	0.129288	-0.268614	-0.158226
Gm11353	1.97636	0.64704	0.586641	-1.23931	-1.05302	-0.667191	0.293565	-0.331571	-0.212513
Cpne8	1.70302	1.15366	0.609927	-1.2884	-0.887957	-0.521129	0.224327	-0.754588	-0.238849
Tnfsf11	1.7879	1.23652	0.39244	-1.29875	-0.857569	-0.732955	-0.0645227	-0.389106	-0.0739551
Iffo2	1.62351	0.191305	1.25063	-0.982511	-0.919618	-0.762916	0.545223	-1.03232	0.0867007
Cxcl9	1.64521	0.556402	1.01995	-1.06376	-0.95373	-0.713267	0.594298	-1.01771	-0.0674006
Tbxas1	1.82113	0.649362	0.993971	-0.90256	-0.962906	-0.862301	0.310208	-0.791999	-0.254905
Pprc1	1.52347	0.529974	0.851975	-0.92281	-0.672405	-1.38729	0.80808	-0.877278	0.146282
Fbxo39	1.2157	0.546591	1.05137	-1.16314	-1.16314	-1.16314	0.69961	-0.545559	0.521702
Usp24	1.54224	0.888052	0.905848	-0.937144	-0.503155	-1.22693	0.432789	-1.09001	-0.0116913
Bmpr1b	1.79071	0.938416	0.804212	-0.98218	-0.493015	-1.03239	0.0711585	-0.987624	-0.109293
Cyp26a1	1.81434	0.563414	0.945577	-1.02696	-0.348007	-1.04104	0.41822	-0.965798	-0.359752
Oas1c	1.18363	1.08502	1.18836	-1.44631	-0.261295	-1.07044	0.20507	-0.809998	-0.0740329
Hrk	1.68421	0.804944	0.752383	-1.55949	-0.264152	-0.869685	0.206187	-0.803943	0.049553
Nup98	1.08033	1.42675	0.980869	-1.40599	-0.351998	-0.856413	-0.253954	-0.919946	0.300357
Larp1	0.955605	1.26677	1.10688	-1.3192	-0.0371846	-1.0016	-0.694997	-0.84201	0.565743
Mdn1	1.31523	0.95063	1.26448	-1.20453	-0.139297	-0.879086	-0.340703	-1.16933	0.202602
Hmga2	1.40335	1.28768	0.920527	-1.17434	-0.129524	-0.774871	-0.61955	-1.05995	0.146678
Xpo4	1.27085	1.41307	0.538649	-1.40104	0.140521	-1.06389	-0.201935	-0.939875	0.243652
Hk2	1.37978	1.51232	0.650828	-1.24693	-0.218026	-1.05041	-0.364218	-0.736113	0.0727796
Seh1l	1.17694	1.5681	0.985695	-0.9632	-0.637367	-1.04254	-0.527906	-0.684858	0.125131
Eif3j	1.40224	1.47042	0.851192	-1.04556	-0.579794	-0.920701	-0.515501	-0.769883	0.107585
Supt16h	1.23497	1.33793	0.715252	-1.11831	-0.364501	-1.31038	-0.48166	-0.654928	0.641637
Dhx37	0.928912	0.753837	1.38251	-1.10717	-0.697636	-0.968323	-0.0449724	-1.11725	0.870098
4930519F16Rik	0.932397	1.25796	1.16406	-0.708781	-0.701483	-0.896717	-0.472238	-1.28914	0.713945
Zbtb26	2.01216	0.0882946	1.34824	-0.556291	-0.496866	-0.603729	-0.467228	-0.896042	-0.428539
Slc7a3	2.06088	0.0841133	1.30802	-0.557496	-0.643256	-0.554182	-0.415554	-0.704507	-0.578011
Zfp598	1.94474	0.0999	1.39022	-0.2599	-0.563476	-0.640096	-0.406057	-0.995349	-0.569991
Mafg	1.87229	0.183018	1.46807	-0.615606	-0.90486	-0.339599	-0.381111	-0.754037	-0.528157
Nupr1	1.87732	0.473536	1.27385	-0.110137	-0.964554	-0.687141	-0.429495	-0.750664	-0.682718
Snrnp48	1.98773	0.466336	1.11386	-0.0925097	-0.705724	-0.65526	-0.462927	-1.02167	-0.629836
Gm867	1.84581	0.198264	1.39189	-0.0645687	-0.886401	-0.382748	-0.329444	-0.886401	-0.886401
Zdhhc20	1.92136	0.839275	0.910173	-0.297524	-1.02509	-0.593009	-0.352035	-0.998439	-0.404711
Plekha3	1.82982	0.964861	0.992713	-0.273702	-0.907824	-0.427784	-0.64666	-0.942421	-0.589006
Pi4k2b	1.90876	0.769316	1.06629	-0.186461	-0.846614	-0.713391	-0.51002	-0.756896	-0.730987
Pcsk9	1.88918	0.805602	1.0416	-0.196712	-0.934364	-0.83085	-0.518918	-0.764798	-0.490743
Fubp3	1.82795	0.829252	1.1289	-0.241325	-0.561983	-0.976628	-0.638689	-0.79715	-0.570331
Yy2	1.6466	0.861666	1.26701	-0.122028	-0.823412	-1.03622	-0.611607	-0.816424	-0.365593
Trim8	1.68638	0.627647	1.1574	-0.198368	-0.251222	-0.373184	-0.301922	-1.58335	-0.763379
Chd2	1.62551	0.198728	1.48304	-0.106478	-0.582478	-0.462161	-0.0060703	-1.42372	-0.726367
Btaf1	1.80189	0.58649	1.17962	-0.0660743	-0.654472	-0.599053	-0.431265	-1.34969	-0.467448
Tcam1	1.47754	0.880529	1.33485	-0.048199	-0.705511	-0.751992	-0.18389	-1.27885	-0.724483
Vprbp	1.84075	0.594451	1.09162	-0.392536	-0.863004	-1.06166	0.0552611	-0.977129	-0.287763
Pydc3	1.69383	0.771789	1.08421	-0.283406	-1.02101	-1.02101	0.154649	-1.02101	-0.358049
Usp31	1.58982	0.600925	1.40788	-0.648703	-1.03569	-0.919917	0.0540211	-0.868489	-0.179847
Tor1aip2	1.62469	0.759474	1.2647	-0.334097	-1.0074	-1.0206	0.11875	-0.786888	-0.618631
Azi2	1.51817	0.759339	1.31297	-0.294457	-1.11641	-1.26017	0.0374467	-0.56322	-0.393668
Aebp2	1.67631	0.480815	1.51769	-0.569799	-0.993727	-0.723986	-0.118765	-0.620035	-0.648503
Cxcl10	1.74048	0.691149	1.34073	-0.573958	-0.724173	-0.75692	-0.140067	-0.839884	-0.737353
Oasl1	1.54383	0.876133	1.35991	-0.538512	-0.992588	-0.631493	-0.04503	-0.995442	-0.576802
Alcam	1.77272	0.253199	1.03774	0.097008	-1.44018	-0.562755	0.186073	-1.10704	-0.236769
Rasip1	1.52901	0.598413	1.37909	-0.331787	-1.376	-0.44243	-0.33294	-1.04481	0.0214553
Nom1	1.89939	0.562557	0.823427	-0.568419	-0.680034	-0.797639	-0.088419	-1.38351	0.232652
Lipg	1.75453	0.360273	0.966904	-0.331923	-1.02133	-1.12582	0.282544	-1.13706	0.251879
Ldlr	1.85409	0.270883	0.967265	-0.12396	-0.653531	-1.19389	-0.37441	-1.16907	0.422618
Lsg1	2.25769	0.209856	0.562229	-0.526429	-0.689915	-0.975589	-0.122443	-0.890102	0.174699
Neto2	2.17282	0.407318	0.427773	-0.478598	-0.909426	-0.818153	-0.0621818	-1.05064	0.311087
E2f3	2.03826	0.614553	0.493863	-0.422076	-0.749014	-1.12637	0.0208916	-1.08199	0.211881
Rrbp1	1.79043	0.813189	1.11944	-0.339943	-0.742116	-1.06199	-0.346712	-0.937358	-0.294938
Slc25a37	1.82687	0.777286	1.06105	-0.280946	-0.667454	-0.995852	-0.163413	-1.07603	-0.481512
Ttll4	1.74743	0.785214	1.13041	-0.539592	-0.592897	-1.08283	-0.00763053	-1.03618	-0.403935
Pign	1.64868	0.914581	1.12698	-0.329381	-0.70712	-1.1232	-0.048263	-1.06075	-0.421522
Samd8	1.74911	1.02816	0.945332	-0.604122	-0.476152	-0.787099	-0.171523	-1.24914	-0.434572
Spred3	1.81678	1.095	0.852707	-0.637916	-0.529139	-0.953049	-0.387049	-0.973391	-0.283952
Slc39a1	1.61016	1.20555	0.992603	-0.516393	-0.969516	-1.06941	-0.25562	-0.665707	-0.331664
Ivl	1.59088	1.15568	1.00587	-0.620516	-0.965878	-1.04646	0.00844034	-0.754257	-0.373758
Zfp281	1.67737	1.16653	0.847626	-0.307816	-0.992164	-1.0195	-0.0488451	-0.897008	-0.426191
Nampt	1.75787	0.92273	0.993003	-0.790921	-0.977636	-1.09601	-0.101773	-0.474821	-0.232436
Aim2	1.55694	1.13236	1.05873	-0.86587	-0.906206	-1.08686	-0.129191	-0.619945	-0.139951
Map2k1	1.92495	0.952444	0.828106	-0.829551	-0.945319	-0.807787	-0.231628	-0.536613	-0.354604
Esf1	1.49988	0.722241	1.45864	-0.650369	-0.722234	-1.10165	-0.357305	-0.901369	0.0521665
Rbm34	1.56147	0.764831	1.25976	-0.656756	-0.599174	-1.1074	-0.378326	-1.0831	0.238694
Htr1b	1.42748	1.05159	1.16151	-0.402155	-0.875878	-1.05019	-0.119135	-1.20877	0.0155457
Uchl4	1.39441	0.998125	1.27179	-0.807332	-0.697757	-0.707403	-0.0650596	-1.34032	-0.0464602
Chd1	1.42555	1.3009	1.12737	-0.593469	-0.908035	-0.749382	-0.603527	-0.948349	-0.0510499
Prkg2	1.57305	1.02264	1.18411	-0.579691	-0.833968	-0.626827	-0.691666	-1.08327	0.035627
Ubr5	1.42589	1.3997	0.912754	-0.849601	-0.382524	-0.873294	-0.361557	-1.18562	-0.0857547
Smg7	1.47126	1.14158	0.984766	-0.771691	-0.480287	-0.974021	-0.0973092	-1.33217	0.0578677
Nup160	1.27153	1.36347	1.11694	-0.823488	-0.757215	-1.0323	-0.181549	-0.962542	0.00515901
Tardbp	1.29195	0.993771	1.24595	-0.441338	-0.660909	-1.57086	0.11286	-0.80752	-0.16391
Ino80	1.48965	0.900098	1.12054	-0.452874	-0.991197	-1.29109	0.249507	-0.882098	-0.142539
Hmha1	1.25138	0.954908	1.18919	0.0623559	-0.843178	-1.33426	0.0320466	-1.26886	-0.0435699
Pnp2	1.14305	1.09753	1.44503	-0.466441	-0.411715	-1.355	0.0252325	-0.945248	-0.532443
Irg1	1.26781	1.20986	1.20598	-0.333023	-0.718802	-1.24896	0.160177	-0.959791	-0.583245
Bcl3	1.37544	1.2452	0.992669	-0.478352	-0.335673	-1.50168	0.0621649	-0.833769	-0.525999
N4bp1	1.9596	0.691506	1.02637	-0.858136	-0.610631	-0.782365	-0.137028	-0.813573	-0.475739
Tmem154	2.16048	0.572638	0.798993	-0.749013	-0.590147	-0.87652	-0.176058	-0.630169	-0.51021
Sf3b3	2.0978	0.525109	0.92949	-0.768651	-0.891565	-0.569525	-0.130776	-0.700976	-0.49091
Anxa9	2.15477	0.243627	0.7721	-1.12417	-0.486956	-0.700521	0.257399	-0.659601	-0.456648
Zyg11b	2.11629	0.442129	0.731513	-0.723153	-0.151755	-0.656033	-0.263898	-1.3075	-0.187595
Unc13a	2.27099	0.301683	0.626097	-0.801947	-0.375269	-0.55209	-0.367942	-1.06496	-0.0365646
Atp13a1	2.1706	0.101934	0.991636	-0.873079	-0.0761201	-0.514973	-0.275965	-0.871579	-0.652455
Moxd1	1.91547	0.487793	0.952257	-0.923784	-0.201949	-0.230688	0.0524852	-1.28233	-0.769246
Ccdc24	1.7283	0.0242261	1.29473	-0.979152	-0.00441296	-0.651117	0.198243	-1.3607	-0.250118
Pou3f1	1.62781	-0.0222571	1.2037	-0.928814	-0.433533	-0.68481	0.874925	-1.18987	-0.447147
Slc25a28	1.81664	0.275463	1.38572	-0.20207	-0.648843	-1.01929	-0.0943952	-0.599953	-0.91328
Trim72	1.73217	0.382593	1.3577	-0.367845	-0.702508	-1.21476	0.13958	-0.610928	-0.716007
Dennd2d	2.05653	0.1823	1.12772	-0.454602	-0.73144	-0.982136	0.0136687	-0.494793	-0.717245
Fubp1	1.80338	0.352907	1.21906	-0.747934	-0.20104	-1.1815	0.179059	-0.493388	-0.930539
Clcn6	1.52566	0.382638	1.40375	-0.352879	-0.706166	-1.23683	0.402123	-1.05193	-0.366363
Ppm1h	1.58471	0.567581	1.19257	-0.518148	-0.546555	-1.33809	0.538709	-0.747135	-0.733641
Arl4a	1.65068	0.648949	1.1352	-0.831975	-0.824857	-1.02527	0.5153	-0.443964	-0.824062
Batf2	1.51695	0.587541	1.17558	-0.730726	-0.948087	-1.05096	0.672448	-0.268874	-0.953862
Stx3	1.81357	0.188242	1.21046	-0.575283	-0.982197	-0.803119	0.533289	-0.578068	-0.806897
Mocos	1.39417	0.316912	1.59969	-1.12419	-0.413384	-0.944118	0.350112	-0.233922	-0.945263
Zcchc4	1.06094	0.522516	1.96789	-0.645861	-0.764364	-0.0817621	-0.345914	-1.11474	-0.598704
Hirip3	1.32874	0.298858	1.73546	-0.358673	-0.8216	-0.0243496	-0.364048	-1.43877	-0.35561
Apobec1	1.1969	0.869236	1.71315	-0.133419	-0.899229	-0.619539	-0.491168	-1.02696	-0.608963
Cd274	1.33749	0.544431	1.68805	-0.359898	-0.95209	-0.472976	-0.0139521	-1.22975	-0.541304
Tgoln1	1.34233	0.360463	1.60286	-0.182279	-0.893343	0.226169	-0.185192	-1.09316	-1.17784
Unc93b1	1.32387	0.119513	1.91498	-0.175075	-0.695828	-0.424658	-0.169791	-0.788092	-1.10492
4933421E11Rik	1.05803	0.441981	1.94305	-0.405171	-1.19622	-0.132678	-0.106213	-0.827119	-0.775662
A230050P20Rik	1.10067	0.62588	1.71226	-0.725531	-1.31461	-0.284239	0.31545	-0.777324	-0.652552
Casp8ap2	0.981853	0.810273	1.76478	-0.183332	-1.43924	-0.339122	-0.645401	-0.772692	-0.177121
Ccdc55	0.793566	0.358612	2.12092	-0.174618	-1.38617	-0.506433	-0.546279	-0.427096	-0.232501
Wdr67	1.37847	0.513604	1.80277	-0.721935	-1.03359	-0.516984	-0.63979	-0.474158	-0.30839
Tyw1	1.18367	0.890129	1.64968	-0.576505	-1.37801	-0.367968	-0.593505	-0.261907	-0.545576
Shmt2	1.6461	0.528219	1.37837	-1.17973	-0.405835	-0.770805	-0.852601	-0.467514	0.123796
Iars	1.57793	0.796704	1.22769	-1.34869	-0.36441	-0.796735	-0.71533	-0.503871	0.126707
Asns	1.68663	0.682101	1.26224	-1.14127	-0.618824	-0.975144	-0.605761	-0.305366	0.0154025
Tex10	1.46986	0.570256	1.25786	-1.56655	-0.106953	-0.974586	-0.697964	-0.0952444	0.143316
Usp36	1.5361	0.627884	1.17043	-1.51151	-0.084766	-0.783203	-0.848445	-0.403571	0.297082
Myc	1.66332	0.55318	1.06087	-1.53189	-0.48254	-1.01175	-0.227102	-0.28303	0.258938
Noc4l	1.65928	0.613688	1.09962	-1.53301	-0.430857	-0.810801	-0.454933	-0.425537	0.28255
Rin1	1.46899	0.747297	1.05349	-1.54522	-0.270312	-0.98251	-0.324425	-0.635597	0.488292
Kri1	1.35736	0.572541	1.35282	-1.54047	-0.448817	-0.856298	-0.239567	-0.65331	0.455745
Erf	1.64868	0.875088	1.27896	-1.19915	-0.588932	-0.358736	-0.594891	-0.688719	-0.372306
Trim39	1.50002	0.580402	1.5771	-1.17655	-0.137318	-0.394861	-0.524221	-0.908836	-0.515734
Uhrf1bp1	1.92402	0.614806	1.08795	-1.0795	-0.257284	-0.60592	-0.345054	-0.916823	-0.422196
Ints6	1.79614	0.840055	1.15212	-0.933017	-0.255151	-0.495007	-0.751848	-0.875592	-0.477703
Cox18	1.569	0.94018	1.35118	-1.00489	-0.204846	-0.783164	-0.596411	-0.631737	-0.639309
Lck	1.78286	0.505043	1.3868	-1.1046	-0.469077	-0.716242	-0.306274	-0.453884	-0.624625
Taf15	1.24134	0.711986	1.78023	-0.723979	-0.34554	-1.11793	-0.447365	-0.756576	-0.342172
Trim14	1.28567	1.06299	1.37681	-0.940964	-0.408511	-1.25849	-0.183837	-0.795276	-0.138383
Slc7a5	1.85238	-0.331826	1.37247	-0.583343	-0.54208	-1.2236	-0.288244	-0.532714	0.276969
Gpatch4	1.63581	0.473299	1.16757	-0.705726	-0.218786	-1.63726	-0.473694	-0.478996	0.237779
RP23-108F2.4	1.26574	0.268497	1.68432	-0.428241	-0.306809	-1.01029	-0.288405	-1.43074	0.245922
Nfe2l1	1.35081	0.530218	1.601	-0.5023	-0.0314396	-0.473813	-1.50621	-0.724719	-0.243543
Aup1	1.42416	0.591754	1.55592	-0.994577	0.0426041	-0.404894	-1.25949	-0.516245	-0.439231
Uqcrq	1.52976	0.322729	1.53729	-0.574267	-0.15727	-0.762181	-1.38233	-0.584107	0.070369
P2rx3	1.37349	0.4206	1.51622	-0.857158	-0.269272	-0.753014	-1.46643	-0.219268	0.254833
Cstb	0.952766	0.699895	1.89524	-0.643666	-0.0927693	-1.15593	-0.970355	-0.148902	-0.536281
Bri3bp	2.18703	-0.0134967	1.08312	-0.573512	-0.47427	-0.117879	-0.589295	-0.728724	-0.772978
Ppp1r15a	2.26907	-0.145408	0.982558	-0.795107	-0.376541	-0.197085	-0.690854	-0.639405	-0.407225
Tbpl1	2.04987	0.259968	1.22877	-0.875201	-0.484306	-0.415703	-0.649151	-0.607507	-0.506739
Rhbdd1	1.9372	0.0662495	1.44554	-0.737239	-0.438701	-0.344038	-0.839657	-0.528064	-0.561294
Otub2	2.08707	-0.141243	1.25363	-0.85954	-0.760341	-0.526599	-0.2482	-0.593365	-0.211411
Car6	1.95366	-0.139635	1.43753	-0.510423	-0.952264	-0.685439	-0.425978	-0.495444	-0.18201
Taf7l	1.8744	-0.258479	1.49008	-0.725965	-0.725965	-0.289425	-0.725965	-0.725965	0.0872889
Vldlr	2.10186	-0.111814	1.102	-0.984397	-0.819081	-0.476492	-0.546091	0.145137	-0.411123
Pycr1	2.02738	-0.63042	1.16804	-1.08912	-0.238874	-0.103948	-0.869435	-0.335839	0.0722081
Tmem209	1.64998	-0.344152	1.67054	-1.1682	-0.704814	-0.305039	-0.398239	-0.496094	0.0960108
Foxj3	1.51731	-0.0540271	1.74387	-1.26944	-0.754691	-0.115891	-0.334994	-0.564892	-0.167242
Arhgef2	1.46881	0.349657	1.74946	-1.13914	-0.557527	-0.414948	-0.740699	-0.550683	-0.164928
Cass4	1.38092	0.0343817	1.7654	-1.22143	-0.505509	-0.425209	-0.727358	-0.636702	0.335511
Ppef1	1.57873	0.0946489	1.58012	-1.3228	-0.441971	-0.610552	-0.704875	-0.380006	0.206704
Cyb5r1	1.93318	-0.326474	1.49728	-0.115236	-0.812105	-0.734177	-0.423265	-0.464911	-0.554301
Acot2	1.94171	-0.302769	1.52472	-0.403988	-0.794371	-0.661252	-0.345032	-0.517932	-0.441082
Angptl6	1.83412	-0.78601	1.62769	-0.355131	-0.717019	-0.429193	-0.620523	-0.222763	-0.331179
Trem3	1.7551	-0.192984	1.56541	-0.221443	-0.767462	-0.767462	-0.767462	0.163758	-0.767462
Adh7	1.67702	-0.582252	1.31811	-0.454292	-1.12757	-1.17363	-0.262584	0.258526	0.346667
Gdap1l1	1.58937	-0.431747	1.53894	-0.113545	-1.2807	-1.11977	-0.0655829	-0.0816208	-0.0353465
Cox6a2	1.75073	-0.183059	1.37526	-0.497895	-1.43033	-0.705119	-0.444951	-0.00985504	0.145222
Agrn	0.775231	1.21189	1.60179	-1.05273	-0.752709	-0.926872	0.181541	-0.878849	-0.15929
Mov10	0.871841	1.29707	1.39053	-1.15229	-0.620979	-1.18731	0.200395	-0.665393	-0.133858
Ascc3	1.16861	0.945137	1.64322	-1.08283	-0.778636	-0.929348	-0.254309	-0.556399	-0.155437
Ndor1	1.06028	0.75463	1.67022	-1.29121	-0.899655	-0.663094	0.0715293	-0.768737	0.0660395
Ankfy1	0.33541	1.3031	1.65396	-1.37853	-0.639782	-0.920162	-0.0981706	-0.485077	0.229252
Trim26	0.465787	0.816045	1.98042	-1.1457	-0.521419	-1.19596	-0.0385933	-0.418724	0.0581416
Ifi35	0.863539	0.93073	1.56758	-1.4354	-1.00342	-0.924301	0.0778127	-0.0479674	-0.028576
Trim21	0.795584	0.802566	1.70502	-1.38453	-1.01737	-0.851001	0.252764	-0.0292901	-0.273753
Ftsjd2	0.772342	1.05953	1.70938	-1.37214	-0.74027	-0.872753	0.00455374	-0.348302	-0.212336
BC023105	0.745455	0.965473	1.29457	-1.77265	-0.599842	-1.0317	0.51028	-0.0161102	-0.0954796
Setdb2	0.384967	0.945026	1.82115	-1.1009	-0.968868	-0.762326	0.624656	-0.278413	-0.665287
Psme2b-ps	0.539024	1.10946	1.57998	-1.11035	-0.727342	-1.20684	0.499402	0.0331529	-0.716483
Chmp4b	1.41535	0.875249	1.43582	-0.768164	-1.02575	-1.06705	0.00830044	-0.379814	-0.493945
Ube2l6	1.31063	0.919699	1.53093	-0.738166	-0.842393	-1.07849	0.0555856	-0.607588	-0.550212
H2-T23	1.42802	0.895743	1.46535	-0.916904	-0.860305	-1.05057	-0.210848	-0.391613	-0.358874
Rsad2	1.27976	1.01149	1.44179	-0.785844	-0.92354	-1.07754	0.0736799	-0.737196	-0.282608
H2-T22	1.2292	1.00293	1.49541	-0.99177	-0.863055	-1.11763	-0.0238803	-0.338662	-0.392547
Mitd1	1.24477	0.892239	1.45662	-0.946449	-0.957876	-1.17149	0.232866	-0.301019	-0.449665
Rai14	1.0916	1.32463	1.30659	-1.0671	-0.774232	-1.09299	0.0803146	-0.311989	-0.55681
Mms22l	0.924391	1.23875	1.48509	-0.90704	-1.16959	-0.628448	0.265926	-0.700056	-0.509024
AW146020	1.2815	1.04534	1.36655	-1.20734	-0.748329	-0.604533	0.233672	-0.570069	-0.796781
Tnfsf8	0.556406	1.12686	1.33405	-1.51529	0.0617718	-1.35917	0.332233	-0.614224	0.0773707
2010002M12Rik	0.8623	0.466277	1.64305	-1.00675	-0.333089	-1.69983	0.486161	-0.238478	-0.179636
Pole	0.561804	0.630893	1.85108	-1.29716	-0.863708	-0.780303	0.607746	-0.671955	-0.038394
Ankhd1	0.453852	1.0921	1.75081	-0.942548	-0.994739	-0.879979	0.50174	-0.764996	-0.216244
Mysm1	0.48548	0.60311	2.03395	-0.853404	-0.868011	-0.475947	0.489942	-1.10379	-0.311331
Fnbp4	0.597711	0.965247	1.99285	-0.723408	-0.488343	-0.950522	-0.0268496	-0.947614	-0.419068
Il18bp	0.805299	0.703835	1.99649	-0.885734	-0.647375	-0.791464	0.223811	-0.662373	-0.742485
Nlgn2	0.314546	1.35555	1.54189	-1.37625	-0.35757	-0.489967	0.505804	-0.908674	-0.585328
Aftph	0.933316	0.49443	2.03205	-1.07542	-0.967591	-0.39958	-0.645718	-0.277531	-0.0939612
Rnf114	0.757944	0.694217	2.11233	-1.11166	-0.572705	-0.503095	-0.60512	-0.404335	-0.36757
Nub1	0.69391	0.135114	2.25751	-0.948263	-1.06602	-0.234855	-0.0931873	-0.254846	-0.489368
Elf1	0.00991679	1.18635	1.91218	-1.14113	-1.06852	-0.387163	0.0692249	-0.5809	3.47867e-05
Plekhm1	0.241969	0.971343	1.8331	-1.52876	-0.761764	-0.740472	0.319368	-0.250968	-0.0838085
Hap1	0.120578	0.914145	2.23572	-0.817193	-0.761667	-0.673824	-0.367843	-0.551779	-0.0981326
Pml	0.400897	0.664523	1.82988	-1.6281	-0.876378	-0.148881	0.51055	-0.196604	-0.555886
Ptgis	0.861895	0.791538	1.71991	-1.39777	-1.05286	-0.0703261	-0.1678	0.0717032	-0.756294
Gm6907	0.112033	1.02773	2.02862	-1.49312	-0.385527	-0.402112	-0.228407	-0.27152	-0.387696
Bhlhe22	0.541933	0.682395	1.77641	-1.85672	-0.0946381	-0.193693	-0.220367	0.0951116	-0.730433
Clic4	1.67757	0.396545	1.36921	-1.14994	-1.10267	-0.733757	-0.187367	-0.188181	-0.0814048
Ywhag	1.78561	0.308257	1.16967	-1.20407	-1.02767	-0.823997	-0.117849	-0.314845	0.2249
Cenpo	1.65867	0.144825	1.26953	-1.03337	-1.38309	-0.730475	0.138669	-0.232907	0.168139
Nemf	1.41625	0.390792	1.53872	-0.633158	-1.21947	-1.05863	-0.175435	-0.577211	0.318142
Nol8	1.59841	0.303088	1.49855	-0.718396	-1.03578	-1.00484	-0.23145	-0.63577	0.226196
Trim66	1.41925	0.0594286	1.68363	-0.909696	-1.09321	-0.847427	-0.415389	-0.286625	0.390042
Chka	0.975427	0.239041	1.95954	-1.23763	-0.948868	-0.648877	0.150226	-0.524113	0.0352536
Daxx	1.42223	0.389255	1.71833	-0.960171	-1.02192	-0.745489	0.0223781	-0.485179	-0.339424
Rnf31	1.42919	0.431057	1.3957	-1.10184	-1.1448	-0.829653	0.526883	-0.557582	-0.148945
Rbm43	1.23291	0.0668372	1.69089	-1.18254	-1.15036	-0.568515	0.504283	-0.562249	-0.0312553
Akna	1.56386	-0.544779	1.65004	-0.570089	-0.60699	-1.20392	0.342483	-0.510171	-0.120437
Map3k6	1.48356	-0.434499	1.63922	-1.14065	-0.542296	-1.02532	0.402736	-0.0476482	-0.335105
2010305A19Rik	1.71422	-0.101663	0.984297	-0.969473	-1.02319	-1.13023	0.425513	-0.511838	0.612366
Gm9936	1.65532	-0.21998	1.33481	-1.35142	-0.552324	-0.687138	-0.188985	-0.623829	0.633543
Ddit3	1.21315	-0.397018	2.07137	-0.920769	-0.823486	-0.398592	-0.564985	0.0832296	-0.262901
Lgals8	1.11135	-0.411721	1.84867	-0.80667	-1.19418	-0.887442	0.114449	0.483558	-0.258008
Cdsn	0.963053	-0.757744	1.70479	-1.37515	-0.884548	-0.496057	0.323595	-0.20346	0.725527
Vapa	1.74228	0.698848	0.492386	-1.31472	-0.810576	-0.809424	-0.891268	0.433411	0.45907
Ppme1	1.8307	0.81099	0.408388	-1.39859	-0.985688	-0.358676	-0.775656	0.0663857	0.402146
Cacna2d1	1.68971	0.456629	0.501921	-1.37464	-1.46734	-0.290583	-0.339961	0.186286	0.637981
Peo1	1.71519	0.455976	0.841796	-1.4511	-1.10381	-0.605621	-0.458958	0.135727	0.470806
Gins4	1.94508	0.729362	0.686393	-1.13559	-1.04768	-0.62804	-0.461552	-0.371875	0.283897
Rnf217	1.92866	1.12219	0.26779	-1.05437	-1.21474	-0.190133	-0.434881	-0.36485	-0.0596636
Rbpsuh-rs3	1.61828	0.749494	1.00885	-1.11055	-1.28336	0.240629	-0.840479	-0.396007	0.0131423
Ubqln4	1.54582	0.443561	1.17547	-1.75437	-0.699332	-0.496265	-0.317627	-0.185943	0.288681
Dph2	1.58751	0.647987	0.851208	-1.83509	-0.709233	-0.543579	-0.249639	-0.0689309	0.319768
Syde2	1.61386	-0.0318334	0.957618	-1.8124	-0.957333	-0.369959	0.202196	0.100793	0.297061
Sult6b1	0.792534	0.342871	1.27109	-1.80744	-1.29704	-0.109107	-0.0726511	0.0621576	0.817588
Kctd15	1.49905	-0.107386	1.09205	-1.63078	-1.17121	0.167688	-0.16124	0.611335	-0.29951
Msi1	1.77418	0.0113164	1.17844	-1.22525	-1.05659	0.163722	0.310006	-0.412185	-0.743644
Nufip2	0.36378	1.58003	1.58672	-1.09104	-0.452222	-0.726841	-0.745193	-0.605667	0.0904347
Rictor	0.45225	1.68552	1.48761	-1.00618	-0.506576	-0.782807	-0.443201	-0.810886	-0.0757306
Il1f10	-0.0619777	1.79711	1.49993	-1.22454	-0.435213	-0.56838	-0.498934	-0.505844	-0.00214172
Traip	0.331014	1.80119	1.33671	-1.12606	-0.651398	0.0459753	-0.580253	-0.860283	-0.296897
Tmem200a	-0.00303073	1.57694	1.09381	-1.8825	-0.207868	-0.252725	-0.140745	-0.652858	0.468978
Brca1	-0.16237	1.45588	1.62171	-1.17882	-1.0529	-0.146031	-0.801705	0.0160746	0.248169
Oas1h	-0.0274309	1.60704	1.55873	-1.08125	-0.365752	-0.486463	-1.08125	-0.429776	0.306147
Isyna1	-0.481329	1.5673	1.30189	-0.816986	-1.28491	-0.536179	0.356825	-0.71589	0.609279
Gm6133	-0.66848	1.82501	1.48082	-0.25507	-0.562592	-0.528554	-0.69053	-0.896759	0.296159
Ctsc	0.817115	1.47186	1.29267	-0.832996	-0.334869	-0.403936	-1.54951	-0.327267	-0.133064
Gngt2	0.934999	1.49841	1.26149	-0.82101	-0.757925	-0.489096	-1.30523	-0.312677	-0.00896318
Fbxo38	0.646486	1.5802	1.20306	-1.23863	-0.607261	-0.113981	-1.15905	-0.561622	0.250801
Kcna3	0.841309	1.31965	1.46654	-0.623221	-1.00907	-0.211435	-1.26585	-0.584646	0.0667211
Ralyl	0.765082	1.38771	1.51202	-0.658053	-0.931048	-0.68211	-1.04249	-0.555778	0.204663
Mettl9	0.738319	1.81278	0.959509	-0.921083	-1.07156	-0.203794	-1.03944	0.0767838	-0.351508
Mgat3	0.458453	1.57893	0.894325	-0.29873	-1.19882	0.839064	-1.35356	-0.535766	-0.383895
Eprs	1.9264	0.320683	1.23414	-0.611794	-0.591123	-0.971247	-0.778597	-0.617904	0.0894451
Eif3c	1.9645	0.361252	1.19823	-0.803312	-0.642152	-0.73019	-0.854894	-0.502674	0.00923134
Pck2	1.96873	0.246774	1.30558	-0.793839	-0.655547	-0.789679	-0.674743	-0.436864	-0.170407
Slc7a11	1.92157	0.264533	1.34116	-0.782103	-0.846002	-0.736304	-0.6341	-0.381547	-0.147209
Rcc2	1.75114	0.45191	1.39245	-0.955999	-0.538734	-0.792311	-0.566245	-0.796761	0.0545462
Slc7a1	1.89313	0.282229	1.32213	-0.853222	-0.4271	-0.850089	-0.633272	-0.744435	0.010629
Slc6a9	1.84626	0.347163	1.43278	-0.767501	-0.904841	-0.631886	-0.406353	-0.573055	-0.342567
Chac1	1.86795	0.090052	1.46057	-0.796571	-0.827426	-0.772791	-0.405573	-0.53024	-0.0859692
Trib3	1.67958	0.429332	1.47468	-0.912499	-0.971724	-0.768801	-0.528315	-0.415655	0.0134068
Mdfic	1.7226	0.690211	1.33303	-0.765365	-0.498493	-1.02691	-0.305581	-0.835885	-0.313617
Sh2d6	1.74596	0.435028	1.47934	-0.483843	-0.541855	-0.68098	-0.606952	-1.06533	-0.28137
Aars	1.9844	0.207324	1.29594	-0.449688	-0.536059	-0.925209	-0.633949	-0.743244	-0.199516
2700007P21Rik	2.03498	0.44092	1.09525	-0.277069	-0.708761	-0.843598	-0.696661	-0.789643	-0.255417
Phf10	2.00335	0.523607	1.11116	-0.525952	-0.593655	-0.781813	-0.968066	-0.433961	-0.334669
Adm2	1.91328	0.32247	1.35104	-0.441234	-0.818423	-0.667386	-0.886036	-0.475641	-0.298073
Cth	1.92473	0.603703	1.11505	-0.909234	-0.53499	-0.899775	-0.597211	-0.635617	-0.0666564
2310057M21Rik	1.84843	0.680919	1.14444	-0.9912	-0.519587	-0.958652	-0.611673	-0.506921	-0.0857517
Bcap29	1.85531	0.771881	1.15626	-0.874396	-0.579435	-0.830539	-0.664642	-0.567361	-0.267078
Mtbp	1.88368	0.556201	1.23018	-0.720912	-0.762162	-0.877241	-0.775684	-0.352415	-0.181651
Plekhf2	1.78964	0.825388	1.10819	-0.68996	-0.696697	-1.04798	-0.829989	-0.359887	-0.0987055
6330416G13Rik	1.89782	0.590475	1.24477	-0.833991	-0.621222	-0.868048	-0.50863	-0.465769	-0.435402
Gm129	2.04381	0.675567	0.991084	-0.588717	-0.722797	-0.820309	-0.532181	-0.599142	-0.447314
Ero1l	1.97769	0.789847	0.953067	-0.853558	-0.478262	-0.516609	-0.861936	-0.704035	-0.306205
Pvr	2.0719	0.665463	0.909707	-0.89926	-0.421532	-0.673958	-0.630454	-0.706741	-0.315123
Pak1ip1	1.88414	0.803069	1.00636	-0.903684	-0.901246	-0.520669	-0.682405	-0.65236	-0.0332032
Eif1	1.9093	0.429779	1.11156	-0.741342	-1.01448	-1.00892	-0.569905	-0.11326	-0.00273252
Krtcap2	2.03729	0.534632	1.02522	-0.654399	-0.919173	-0.82645	-0.621463	-0.240377	-0.335279
Rap1gds1	1.97905	0.713454	0.752777	-0.917449	-1.12618	-0.865239	-0.355704	-0.0347974	-0.145912
Necap2	1.89644	0.536816	1.10919	-0.425117	-0.646018	-1.33653	-0.248758	-0.595044	-0.290987
Atpbd4	1.78057	0.691102	1.10623	-0.54062	-0.930104	-1.1945	0.03803	-0.68823	-0.262479
Tmem87a	1.66146	0.582722	1.4976	-0.608775	-1.01298	-0.847572	-0.444518	-0.384524	-0.443416
Lilrb4	1.79641	0.776224	1.1583	-0.464161	-1.03171	-1.03171	-0.415092	-0.420964	-0.367294
Gpt2	2.24717	0.220023	0.918404	-0.309012	-0.603624	-0.710564	-0.486446	-0.784503	-0.491448
Siah2	2.183	0.20408	1.04454	-0.362363	-0.674501	-0.673818	-0.573052	-0.766677	-0.381209
Pi4k2a	2.1921	0.22903	1.0067	-0.557298	-0.79046	-0.42486	-0.410253	-0.809027	-0.435934
Dusp6	2.24713	0.532929	0.555822	-0.584392	-1.09236	-0.460808	-0.313581	-0.687964	-0.19677
Ndst3	2.07728	0.547414	0.899462	-0.332614	-0.984381	-0.395524	-0.797963	-0.814763	-0.198908
Aldh1l2	2.13001	-0.185894	1.23433	-0.34765	-0.89359	-0.595747	-0.392018	-0.58926	-0.360183
Leprotl1	2.21529	-0.0734194	1.10231	-0.443179	-0.790812	-0.540868	-0.617145	-0.508988	-0.343181
Nfxl1	2.31836	-0.0835081	0.902972	-0.667525	-0.732722	-0.588936	-0.451137	-0.464413	-0.233096
Plin2	2.19046	-0.348648	1.2033	-0.659578	-0.596467	-0.446292	-0.407328	-0.328107	-0.607336
Ier2	2.38058	-0.0617074	0.639293	-0.456475	-0.852576	-0.741925	-0.0683482	-0.221762	-0.617077
Dnajb9	2.44678	-0.231248	0.604728	-0.304734	-0.897021	-0.45861	-0.231961	-0.494832	-0.433105
Sdad1	2.1286	0.428479	0.821631	-0.88724	-0.386303	-1.1326	-0.191192	-0.547769	-0.233612
Sip1	2.18993	0.367752	0.749075	-0.881225	-0.300974	-1.00954	-0.453823	-0.64442	-0.0167792
Twistnb	2.20581	0.394377	0.565497	-0.89016	-0.65634	-1.06588	-0.0748178	-0.539021	0.0605348
Dars	2.15151	0.760924	0.209932	-1.13012	-0.345643	-1.08162	-0.396108	-0.155974	-0.0128931
Pfkp	2.14592	0.673213	0.441149	-0.837085	-0.668116	-1.19413	-0.401407	-0.0677177	-0.0918267
Hnrnpf	1.90174	0.700496	0.528355	-0.896584	-0.472925	-1.58997	-0.0238669	-0.226273	0.0790327
Serp2	1.97085	0.652263	0.60228	-0.585692	-0.396	-1.62636	-0.230868	-0.358545	-0.0279271
Dusp11	2.09814	0.452879	0.371345	-0.934056	-0.118392	-1.49367	0.0431888	-0.363737	-0.055703
Gar1	2.0446	0.320321	0.670686	-0.864725	-0.238892	-1.46342	-0.297875	-0.415089	0.2444
Taf5l	2.06417	0.00507494	0.691341	-1.13395	-0.451404	-1.17704	0.399914	-0.470171	0.0720661
Utp14a	2.13306	-0.167432	0.698087	-0.849809	-0.686284	-1.21387	0.232986	-0.391962	0.245216
Qtrtd1	2.36528	-0.286139	0.492398	-0.6148	-0.479247	-1.07946	0.144165	-0.536091	-0.00610711
Aldh18a1	2.12127	0.186873	1.05578	-0.861789	-0.465432	-0.799881	-0.674451	-0.54433	-0.0180421
Slc1a5	2.08546	-0.104382	1.22495	-0.834202	-0.239072	-0.786984	-0.726091	-0.464513	-0.155168
Nop14	2.03708	-0.0315426	1.16832	-1.11922	-0.361976	-0.900844	-0.484043	-0.215068	-0.0927071
Eif4ebp1	2.00019	0.453103	1.00067	-1.13572	-0.0834839	-0.824016	-0.56861	-0.684538	-0.157597
Fosl1	2.21854	0.337817	0.753532	-0.970739	-0.0671793	-0.909136	-0.479589	-0.478461	-0.404783
Trmt61a	2.02491	0.108002	0.842401	-1.03451	0.0756047	-1.02721	-0.468876	-0.848436	0.328111
Rbm17	2.21551	0.396407	0.626775	-0.957419	-0.300593	-0.968199	-0.740364	-0.213404	-0.0587092
Zmynd19	2.27096	0.424388	0.419219	-0.981927	-0.634919	-0.83327	-0.631968	-0.128761	0.0962729
Slc25a33	2.21921	0.269478	0.738447	-0.730025	-0.632506	-0.882518	-0.857253	-0.0988202	-0.0260181
Ifrd2	2.02507	0.220973	0.797672	-0.975087	-0.590154	-1.04494	-0.638916	-0.340986	0.546361
Rbpj	2.06887	0.394954	0.754684	-1.22292	-0.531377	-0.733371	-0.213709	-0.758133	0.240997
Tut1	2.1202	0.467571	0.583023	-1.20146	-0.572109	-0.441832	-0.215597	-0.944378	0.204578
Pim3	2.26247	0.610245	0.355222	-1.15976	-0.522934	-0.48657	-0.553326	-0.468905	-0.0364429
Polr3d	2.38854	0.184716	0.400666	-0.999225	-0.1577	-0.558605	-0.436591	-0.754823	-0.0669796
Nip7	2.34115	0.293533	0.334697	-1.04008	-0.311583	-0.849373	-0.517058	-0.37226	0.120973
Gm9797	2.21468	0.539661	0.346066	-1.15991	-0.11286	-0.786083	-0.750669	-0.371645	0.0807663
Sacs	2.18646	0.184893	0.648843	-1.12478	-0.0610426	-0.746939	-0.787144	-0.519454	0.219165
Noc3l	2.12601	0.363914	0.476728	-1.26186	-0.0555087	-1.03225	-0.36388	-0.510665	0.257506
Rsl1d1	2.13457	0.764727	0.308106	-0.929022	-0.351012	-1.04649	-0.59743	-0.519452	0.236012
Wdr75	1.98847	0.949259	0.502184	-0.78179	-0.326579	-1.07723	-0.817187	-0.572873	0.135745
Slc4a4	2.01025	1.04966	0.265406	-0.856072	-0.285741	-1.11013	-0.397227	-0.75843	0.0822805
Nup133	2.01681	0.939335	0.429051	-0.970966	-0.508157	-0.488939	-0.649954	-0.979092	0.211909
H2afy	2.0899	0.987257	0.357752	-0.817755	-0.468236	-0.754365	-0.500672	-0.906525	0.0126441
Dbr1	1.8481	0.797342	0.594829	-1.06303	-0.527238	-0.933856	-0.37303	-0.918832	0.575714
Mreg	1.8931	0.922811	0.391188	-1.44814	-0.182333	-0.8049	-0.369258	-0.657311	0.254843
Ibtk	2.17677	0.741356	0.441329	-0.368593	-1.0114	-0.924825	-0.167247	-0.645564	-0.24182
Rnaseh2a	2.22293	0.732334	0.380278	-0.466552	-0.74699	-1.05336	-0.136099	-0.60602	-0.326521
Smndc1	2.21452	0.694298	0.385286	-0.713498	-0.853637	-0.781002	-0.1444	-0.771959	-0.0296099
Eif5	2.19765	0.419138	0.7194	-0.42944	-0.953375	-0.838102	-0.256973	-0.780578	-0.0777163
Ipmk	2.24672	0.442014	0.645534	-0.494371	-0.781112	-1.05039	-0.289877	-0.50097	-0.217547
Ssr1	2.1653	0.600284	0.262048	-0.233677	-0.983486	-1.21962	-0.334737	-0.465928	0.209818
Grsf1	2.32001	0.462301	0.169632	-0.388935	-0.6501	-1.26488	-0.102742	-0.417548	-0.127746
Wdr5	2.17611	0.575054	0.671047	-0.696094	-0.650881	-1.0948	-0.520587	-0.225837	-0.234018
Stard3nl	2.07141	0.580765	0.80298	-0.647722	-0.924323	-1.0527	-0.523904	-0.261966	-0.0445407
Med6	2.18547	0.668331	0.63957	-0.401971	-0.776468	-0.962488	-0.660307	-0.317858	-0.374282
Papola	2.03548	0.764694	0.653067	-0.455641	-0.760451	-1.3094	-0.181267	-0.503032	-0.243451
Dnajc21	2.08292	0.708198	0.654428	-0.654569	-0.95257	-1.10088	-0.234917	-0.285555	-0.217053
Tbrg1	2.23231	0.186781	0.498306	-0.285295	-1.11196	-1.05637	0.235098	-0.33623	-0.362632
Mllt10	2.24659	0.191323	0.59798	-0.487954	-0.955937	-1.12405	0.0533404	-0.308137	-0.213161
Ranbp1	2.25104	0.128721	0.346326	-0.468857	-0.809908	-1.32963	0.260104	-0.271396	-0.106401
Fam125a	2.15066	0.405815	0.514481	-0.554601	-0.618954	-1.31556	0.312959	-0.560592	-0.334206
Coq2	2.0684	0.490363	0.85933	-0.737328	-0.757395	-1.10142	0.0702185	-0.37719	-0.514979
Mid1ip1	1.91616	0.250647	0.875953	-0.0363409	-1.05727	-1.46339	0.138529	-0.420564	-0.203724
Pin4	1.92093	0.204825	0.955388	-0.133924	-1.17355	-1.37553	-0.196922	-0.0332336	-0.167985
Papd4	2.01968	0.107068	0.971616	0.214888	-1.05839	-1.18535	-0.294522	-0.446334	-0.328657
Cebpg	1.97217	0.230609	1.22986	-0.344871	-1.00617	-1.01719	-0.38005	-0.352641	-0.331717
Plekha1	2.0018	0.395481	1.00979	-0.0606751	-1.15567	-0.930507	-0.231785	-0.393695	-0.634737
Eif3a	2.18497	-0.0859411	0.897899	-0.266849	-0.82832	-1.16393	0.0284924	-0.437089	-0.329231
Slc3a2	2.22091	-0.250366	0.986562	-0.217882	-0.833604	-0.998249	-0.196978	-0.383437	-0.326953
Tcea1	2.22775	0.111339	0.809783	-0.484213	-0.756294	-1.14186	-0.427161	-0.266234	-0.0731143
Rheb	2.1867	0.146236	0.754045	-0.217713	-0.631523	-1.38345	-0.161055	-0.378052	-0.315188
Tmem165	2.3096	0.529661	0.376106	-0.334405	-0.896873	-0.840145	-0.129475	-0.294698	-0.719774
Prss46	2.1812	0.936854	0.286715	-0.350942	-0.808792	-0.808792	-0.311358	-0.316095	-0.808792
Tram1	2.28002	0.700733	0.221922	-0.0396403	-0.800481	-0.986656	-0.425165	-0.395777	-0.554958
Adamts4	2.30288	0.555683	0.0212249	-0.17965	-1.16318	-0.881935	0.00970773	-0.373741	-0.290994
Pion	2.35195	0.222157	0.368653	-0.102129	-1.0039	-0.704102	0.0972983	-0.574857	-0.655076
Cdc45	2.02595	0.595533	0.851009	-0.228555	-1.33568	-0.562505	-0.264433	-0.471977	-0.609343
Sypl	1.95317	0.725889	0.80134	-0.236458	-1.40354	-0.74166	-0.207759	-0.450486	-0.440496
Stom	1.9772	0.426203	0.633166	0.305921	-1.57766	-0.758682	-0.30254	-0.425539	-0.278062
Lamc2	2.15744	0.497624	0.537462	-0.067695	-1.23979	-0.223578	-0.109375	-0.796421	-0.755671
Fbxl5	2.00463	0.722615	0.821174	-0.16534	-1.03935	-1.02738	-0.567597	-0.47285	-0.275894
Vegfa	1.88068	0.913711	0.847765	-0.129142	-1.10623	-0.964151	-0.511069	-0.614685	-0.316883
Fam100b	1.85461	0.910992	0.893665	-0.328483	-1.15741	-1.01487	-0.443705	-0.389673	-0.325124
1700029F09Rik	1.83668	1.03157	0.641634	-0.128548	-1.10657	-1.13127	-0.716157	-0.100092	-0.327236
Dusp23	1.85923	0.548126	0.904363	0.104297	-1.40292	-1.02827	-0.513448	-0.318782	-0.1526
Gstk1	2.04576	0.573659	0.679207	-0.121791	-1.20553	-0.974921	-0.639908	-0.435956	0.0794752
Ier3	1.92979	0.56917	0.335843	-0.0166168	-1.61974	-1.04261	-0.182052	-0.204594	0.230807
Adpgk	2.08211	0.388704	0.583033	-0.234577	-1.56298	-0.601854	-0.533954	-0.163385	0.042903
Slc2a1	2.14594	0.993838	0.271274	-0.574116	-1.04685	-0.652935	-0.474176	-0.46789	-0.195085
Rnf149	2.19651	0.851553	0.277982	-0.177439	-1.07658	-0.701625	-0.642512	-0.44273	-0.285155
Wdr61	1.93757	1.06602	0.433581	-0.529508	-1.13363	-0.791811	-0.843595	-0.131469	-0.0071579
Dld	2.27258	0.1794	0.472272	-0.253005	-0.920357	-1.13305	-0.620107	0.0204524	-0.01818
0610007P14Rik	2.30798	0.377106	0.533688	-0.122374	-0.811359	-0.716396	-0.88339	-0.193398	-0.491854
Dnmt3l	1.73161	0.530448	1.24247	-0.424001	-0.904408	-1.38498	-0.349205	-0.0779479	-0.363985
9130017N09Rik	1.63939	0.63479	1.3607	-0.780655	-0.586705	-1.27856	-0.327962	-0.0625698	-0.59843
Psmg4	1.76593	0.341827	1.24289	-0.505779	-0.42952	-1.3235	-0.769953	0.276826	-0.598724
2410042D21Rik	1.57452	0.607177	1.29384	-0.823717	-1.2872	-0.904384	-0.527572	0.182519	-0.115181
Tmem221	1.36469	0.8547	1.25913	-1.11294	-1.21696	-0.57915	-0.473222	0.470581	-0.566829
Dut	1.76906	1.21736	0.0500276	-0.707116	-0.885329	-1.15661	-0.454024	0.605025	-0.438397
2410016O06Rik	2.16661	0.708121	0.249387	-0.719939	-0.799457	-0.936361	-0.7008	0.34507	-0.312636
Acsl4	2.00557	0.951706	0.593378	-0.0728281	-0.729832	-0.865136	-0.367613	-1.03177	-0.483474
Homer1	2.00751	0.86334	0.778413	-0.291741	-0.73351	-0.806714	-0.347925	-1.00312	-0.466253
Cyp51	2.16565	0.563238	0.711851	-0.127446	-0.568986	-0.908836	-0.57057	-0.944302	-0.320593
Cyb5b	2.01129	0.91073	0.593648	-0.188806	-0.348742	-0.817681	-0.514362	-1.22777	-0.418311
Otud4	1.92265	1.03725	0.507937	-0.252189	-0.357199	-0.90665	-0.553964	-1.27878	-0.11905
Pdia3	2.06562	0.953676	0.233993	0.199245	-0.769266	-0.919103	-0.442596	-0.995146	-0.326421
Taf5	2.1204	0.844136	0.312793	0.096853	-0.845068	-0.608488	-0.412279	-1.13641	-0.371931
Hccs	2.15879	0.636516	0.39159	0.310953	-0.602111	-0.836006	-0.619823	-1.03787	-0.402035
Dcn	1.85814	1.19806	0.548311	-0.333444	-0.309002	-1.12758	-0.275531	-0.924624	-0.634325
Slc39a14	1.95869	1.14475	0.491886	-0.372612	-0.490147	-0.91231	-0.208652	-0.975435	-0.636172
Rarres2	2.02112	1.18502	0.333552	-0.549437	-0.273675	-0.737979	-0.329808	-0.895524	-0.75327
Trim33	1.88713	0.910938	0.996333	-0.410788	-0.544094	-0.533871	-0.621313	-1.01815	-0.666178
Rsbn1	1.98573	0.885764	0.840698	-0.427041	-0.480769	-0.506995	-0.471328	-0.965831	-0.860228
Bnip3	1.95591	1.31879	0.274727	-0.563518	-0.86798	-0.783023	-0.219485	-0.505852	-0.609577
Gm14226	1.84537	1.3734	0.451714	-0.464988	-0.800106	-0.934475	-0.371485	-0.422518	-0.676907
Higd1a	2.02946	1.27029	0.070262	-0.383549	-0.862756	-0.941709	-0.362076	-0.317247	-0.50268
Gnpda2	2.11143	1.02967	0.351142	-0.815265	-0.562666	-0.774262	-0.277172	-0.270766	-0.792119
Kdm3a	1.80534	1.15483	0.721076	-0.565502	-0.969614	-0.881229	0.0364776	-0.615116	-0.686264
Phyh	1.86307	1.19587	0.517599	-0.409799	-0.606877	-0.945978	0.0115629	-0.61443	-1.01102
Gm5559	2.10932	1.22696	0.0830224	-0.654987	-0.365879	-0.615817	-0.540624	-0.749104	-0.492883
Fam162a	2.11279	1.17969	0.21757	-0.538771	-0.700565	-0.693668	-0.507011	-0.586666	-0.483366
Nup93	2.17323	1.05511	0.184982	-0.802843	-0.608006	-0.510522	-0.504419	-0.731117	-0.256419
D030056L22Rik	2.34038	0.735572	0.173453	-0.73355	-0.81436	-0.504345	-0.299777	-0.407967	-0.489406
Acer3	2.3731	0.61787	0.252323	-0.580659	-0.636155	-0.771702	-0.247277	-0.595646	-0.411859
Srpr	2.26771	0.354076	0.731273	-0.0590528	-0.709546	-0.745785	-0.558685	-0.602049	-0.677947
Slc25a1	2.2605	0.346919	0.600298	0.146932	-0.669867	-0.860451	-0.364052	-0.729137	-0.731142
Tmem214	2.29537	0.238978	0.387053	0.343043	-0.308075	-0.934924	-0.48297	-0.871636	-0.666839
Tmem39a	2.36906	0.000577232	0.609903	-0.114093	-0.36101	-0.23655	-0.523817	-0.769551	-0.974518
Ppapdc1b	2.3933	-0.0649188	0.683977	-0.0505226	-0.416085	-0.594112	-0.626543	-0.640739	-0.684355
Rnf11	2.56261	0.15914	0.0988817	-0.269195	-0.537535	-0.387845	-0.521887	-0.597704	-0.506461
Ctage5	2.43089	0.464291	0.147095	-0.231611	-0.529944	-0.671857	-0.246018	-0.879552	-0.483291
Gcc1	2.31624	0.3747	0.515376	-0.187599	-0.793196	-0.694238	-0.142379	-0.915673	-0.473237
Chd7	2.33312	0.520983	0.413887	-0.511558	-0.137831	-0.575156	-0.410902	-0.837346	-0.795197
Ptges	2.41937	0.428	-0.180729	0.0201917	-0.764195	-0.14231	-0.973956	-0.241268	-0.565103
Il1a	2.4694	0.65867	-0.526996	-0.532971	-0.433808	-0.217087	-0.485831	-0.491471	-0.43991
Fdps	1.82416	0.898169	0.86489	-0.557195	-0.0536736	-0.792508	-1.28088	-0.704427	-0.198536
Nsdhl	1.93845	0.794095	0.836087	-0.36228	-0.228873	-0.748843	-1.17807	-0.863431	-0.187133
Gmfb	1.81886	1.14942	0.618912	-0.315099	-0.221591	-0.956027	-1.18072	-0.695201	-0.218549
Sqle	1.7822	0.730872	0.693781	0.0643105	-0.0207943	-1.01039	-1.39288	-0.915434	0.0683321
Fam108b	1.77861	0.877411	0.770829	-0.135903	-0.0237559	-0.914449	-1.48807	-0.552952	-0.311716
Hmgcr	1.93073	0.756562	0.865631	-0.16275	-0.390442	-0.856578	-0.99126	-1.0186	-0.133301
Fdft1	1.93425	0.75812	0.835195	-0.165307	-0.149835	-0.937108	-0.871001	-1.09822	-0.306098
Idi1	1.85367	0.812327	0.794016	-0.0386047	-0.43013	-1.22977	-0.85841	-0.915275	0.0121819
Lss	1.83375	0.736447	0.959039	-0.606826	-0.186893	-0.738386	-1.06473	-1.04001	0.107612
Zmpste24	2.09613	0.806443	0.713541	-0.542882	-0.47383	-0.655257	-0.670331	-0.981495	-0.292323
Pdp2	2.15493	0.793231	0.546067	-0.401735	-0.701848	-0.570423	-0.52093	-1.05833	-0.240967
Agfg1	1.99467	0.965811	0.693631	-0.55496	-0.874445	-0.768241	-0.620643	-0.741987	-0.0938346
Aacs	1.91429	0.647376	0.931686	-0.613691	-0.487811	-1.11869	-0.725512	-0.776808	0.229155
Sarnp	2.03365	0.930907	0.402252	-0.439518	-0.507931	-1.08507	-0.794698	-0.733597	0.194004
Tlr7	1.77509	0.929301	0.703002	-0.374024	-0.726298	-1.1791	-0.453582	-1.04445	0.370059
Prdx6	2.26693	0.856538	0.0433682	-0.0928087	-0.357615	-0.9826	-0.615246	-0.657742	-0.460821
Csf3	1.9053	1.21331	0.198339	-0.144684	-0.27265	-1.40574	-0.49561	-0.645933	-0.352332
Prdx5	2.06425	1.2488	-0.206342	-0.298524	-0.454284	-1.02711	-0.667437	-0.578186	-0.0811669
1100001G20Rik	1.90678	1.35873	0.160033	-0.199559	-0.781434	-0.781434	-0.781434	-0.781434	-0.100247
Cnot1	1.50403	1.45444	0.163222	-0.194261	-0.515322	-1.26666	0.333421	-1.23108	-0.247783
Il18rap	1.81664	1.1171	0.348879	-0.103861	-0.496594	-1.31504	0.00504577	-1.13441	-0.237759
Il1rl1	1.86389	1.0966	0.0425218	-0.0513346	-0.373924	-0.911819	0.0919201	-1.5091	-0.248753
Uso1	1.90321	1.25051	-0.0419809	0.00309001	-0.740451	-0.86797	0.1968	-0.955154	-0.748049
Rab4b	2.12562	1.08551	-0.121524	-0.334453	-0.331163	-0.977677	0.039555	-0.689147	-0.796722
Acat3	1.90104	1.47011	-0.255608	-0.570359	-0.539411	-0.509347	0.048488	-0.982287	-0.562625
Junb	2.03627	0.843221	0.591869	-0.575448	-0.900585	-1.00913	0.112447	-0.637567	-0.461081
Slc20a2	2.05401	0.707673	0.593311	-0.421753	-0.818016	-0.967297	0.245091	-0.936511	-0.45651
Abhd11	2.1158	0.71543	0.375441	-0.671641	-0.482581	-0.917825	0.375717	-0.931904	-0.578439
Hipk1	1.8719	0.912253	0.416621	-0.270373	-1.0445	-0.747452	0.489583	-1.13221	-0.495825
Spop	1.98953	0.982488	0.456713	-0.267188	-1.00963	-0.630536	0.108266	-0.956229	-0.673415
Uggt1	1.76181	0.898551	0.718512	-0.109969	-0.895981	-1.28874	0.0842673	-1.03529	-0.133169
Slc7a6	1.95399	0.727662	0.576798	-0.0154369	-1.0457	-1.11903	-0.0264515	-0.984109	-0.067725
Ahctf1	1.77388	0.957873	0.245797	-0.123432	-0.884572	-1.34574	0.175966	-1.0766	0.276835
Gpc4	1.88485	0.696154	0.0310369	0.0323714	-1.27557	-1.10999	0.586732	-0.869887	0.0242963
Cd14	2.07366	0.770899	0.0346962	-0.0163945	-1.00208	-1.29435	0.112707	-0.640689	-0.0384588
Etv1	1.84182	1.01992	0.613145	-0.419182	-1.2967	-0.736857	-0.140451	-0.878453	-0.00323649
D16Ertd472e	1.84194	1.02544	0.524936	-0.489933	-1.25009	-0.582136	0.121013	-1.05081	-0.140354
Serpinb9e	1.77272	1.08717	0.408744	-0.140718	-1.25635	-0.572646	-0.0599243	-1.25635	0.0173606
Capn6	1.64171	1.41385	0.313321	-0.315446	-1.04278	-0.220813	0.143493	-0.763564	-1.16978
Tmem139	1.5773	1.23867	0.408693	0.0306413	-1.13547	-0.500787	0.413029	-0.884663	-1.14741
Prkch	2.02056	1.18194	0.0559488	-0.329859	-0.961269	-0.296257	-0.0291977	-0.666141	-0.97572
Hsbp1l1	1.62132	1.21049	0.0349213	0.29327	-1.73753	-0.540942	0.0878248	-0.606356	-0.363004
Ccl4	1.84335	0.971112	-0.049166	-0.0585561	-1.29514	0.392027	-0.166463	-1.29514	-0.342034
Stk24	1.85781	1.42821	-0.640613	-0.93819	-0.772694	-0.777106	-0.0461548	-0.122303	0.0110374
Tnfrsf21	2.0392	1.24968	-0.76862	-1.05567	-0.445017	-0.412995	-0.177793	-0.417616	-0.0111716
Egln1	2.18715	1.07248	-0.630482	-0.401904	-0.631933	-0.815722	0.0782874	-0.244192	-0.61369
Btg3	1.92963	0.803642	-0.323343	-0.0225053	-1.30553	-1.0379	-0.207213	-0.504783	0.668014
Gm949	2.11202	0.625655	-0.586359	0.128054	-0.996054	-1.2003	0.161188	-0.50881	0.264607
Snai1	1.66017	1.05061	-0.355234	-0.593791	-1.50539	-1.04819	0.466467	0.276411	0.0489548
Spink5	1.91347	0.846188	-0.21793	-0.518885	-1.20982	-1.30352	0.168598	-0.0162613	0.338161
Tmf1	1.84779	0.739612	0.890252	0.0841842	-1.06359	-0.778704	-0.52127	-1.10499	-0.0932824
Oaf	1.82554	0.787258	0.71041	0.501704	-1.01809	-1.11061	-0.578676	-0.734777	-0.382756
Smarca5	1.81607	0.989505	0.352059	0.240134	-1.02198	-1.23955	-0.189714	-0.961266	0.0147496
Has1	1.90242	0.853821	0.372068	0.319422	-0.878681	-0.84922	-0.285556	-1.35272	-0.0815536
Tmem170b	1.48903	0.967651	0.963681	0.510037	-0.881362	-0.878992	-0.386347	-1.32089	-0.462807
Areg	1.53256	1.03665	1.01935	0.294205	-0.849634	-1.08706	-0.363378	-1.07675	-0.505945
Il1rl2	1.4796	1.04386	0.709697	0.610588	-0.816842	-1.23791	-0.359244	-1.2118	-0.217955
Cebpb	1.66024	1.05073	0.627629	0.462799	-1.14237	-0.84425	-0.361613	-1.13098	-0.322177
a	1.36423	1.24509	0.815414	0.337605	-1.16472	-1.02793	-0.0124243	-1.0818	-0.47547
Spp1	1.74727	1.02414	0.850063	-0.0359229	-1.17713	-0.775137	-0.212998	-0.968837	-0.451446
Ereg	1.76661	0.943118	0.842462	0.054436	-1.19073	-1.00232	-0.276732	-0.824979	-0.311862
Atp2a2	1.79903	0.917685	0.77313	-0.0194095	-1.07114	-0.95507	0.00388191	-1.05209	-0.396021
Il1rap	1.74527	0.76478	0.842601	0.0680014	-1.20827	-1.16196	0.173782	-0.792258	-0.431948
Aicda	1.61801	1.00321	0.810872	0.0776427	-1.18012	-1.05	0.202948	-0.937124	-0.545429
Tnfsf9	1.77974	0.932325	0.576181	0.0786495	-1.43543	-0.869189	0.140653	-0.782962	-0.419966
Nos2	1.62962	1.11223	0.562208	0.401301	-1.13837	-1.0965	0.0330025	-0.733747	-0.769748
Ell2	1.91273	0.6698	0.367209	0.319001	-1.32914	-1.20981	-0.0782889	-0.647951	-0.00354136
Ninj1	2.0025	0.673543	0.412053	0.342147	-1.14535	-1.24522	-0.410147	-0.416453	-0.213069
Lbr	1.95649	0.629885	0.246171	0.464756	-1.06784	-1.31495	0.163108	-0.644086	-0.433526
Itga2	2.01377	0.426793	0.371236	0.480557	-1.04056	-1.07528	0.115085	-1.0379	-0.253698
Ivns1abp	1.88534	1.18858	0.0501166	0.283159	-0.883008	-1.20116	-0.441006	-0.709461	-0.17256
Il6	1.66854	1.22147	0.04891	0.70583	-0.941859	-1.23127	-0.366077	-0.746595	-0.35896
Zc3h12c	1.51126	0.976669	0.874328	0.229369	-1.32197	-1.22898	-0.0214231	-0.798803	-0.220454
Ptger2	1.64852	0.555279	0.910057	0.507392	-1.28446	-1.28834	-0.042808	-0.691606	-0.314036
Ccar1	1.62225	0.65846	1.00546	0.142456	-1.06346	-1.40238	-0.10458	-0.890987	0.0327838
Hnrnpu	1.41883	0.574323	1.01866	0.229806	-1.10188	-1.62019	0.395052	-0.734024	-0.180584
Rif1	1.66915	0.57028	0.923011	0.252977	-0.984002	-1.48701	0.151961	-0.839059	-0.257301
Arhgap11a	1.01121	0.928522	0.915103	0.516381	-1.2871	-1.73036	0.168412	-0.57396	0.0517855
Sema7a	1.14863	0.792221	1.10718	0.316692	-1.49798	-1.43907	0.0107364	-0.61658	0.178172
Kif15	1.48848	1.37849	0.441339	-0.123434	-0.926519	-1.60753	0.0281169	-0.326925	-0.352016
Ttk	1.50406	1.32199	0.464904	0.135848	-0.723721	-1.68967	-0.435179	-0.188532	-0.3897
Ncapg	1.27641	1.23904	0.927431	0.11966	-0.945856	-1.63664	-0.255976	-0.535517	-0.18855
Abcb7	1.68673	0.900895	0.391627	0.18361	-0.91741	-1.71753	-0.213366	-0.524493	0.209944
Alg13	1.88999	0.783496	0.481856	0.0131759	-0.862629	-1.63238	-0.137071	-0.196676	-0.339758
Uxs1	1.1424	1.48798	0.169092	-0.179219	-1.01649	-1.34855	0.406559	-1.10032	0.438539
Fgf10	1.20098	1.22905	0.316945	0.156272	-1.10101	-1.48165	0.219544	-1.08266	0.542533
Hsph1	1.01158	1.41541	0.189292	-0.141547	-1.10379	-1.30026	-0.00649368	-1.03368	0.969482
5330437I02Rik	1.41847	1.13429	0.404972	-0.113727	-1.28259	-1.07477	-0.302001	-0.991205	0.806562
B4galt1	1.53832	1.3079	0.662998	-0.381661	-0.962855	-0.92686	0.366126	-1.0581	-0.545867
2017-03-05	1.61319	1.21817	0.697738	-0.441199	-1.0425	-1.0232	0.355743	-0.795173	-0.58276
Rps6ka3	1.41131	1.45881	0.443473	-0.246765	-0.85905	-0.939813	0.51012	-1.17214	-0.605942
Sec24b	1.31107	1.45646	0.685952	-0.536797	-0.86762	-1.01827	0.473569	-1.10974	-0.39462
5031434C07Rik	1.65248	1.09116	0.533568	-0.445009	-0.699128	-1.0881	0.491867	-1.26859	-0.268259
Cd47	1.49133	1.26578	0.399636	0.0299732	-0.38998	-1.38152	0.445737	-1.03576	-0.825198
Crabp2	1.41381	1.09359	0.764956	-0.125696	-0.553113	-1.15659	0.632306	-1.13429	-0.934983
Bmp1	1.19967	1.77852	0.650786	-0.224058	-0.514682	-0.878224	-0.0975537	-1.10839	-0.806066
Zwilch	1.4048	1.52867	0.742712	0.0287787	-0.858195	-0.86094	-0.2089	-1.02479	-0.752141
Bmpr2	1.33866	1.57736	0.167292	0.287655	-0.592776	-1.02901	0.301542	-1.0767	-0.974019
Trip12	0.546575	1.83254	0.76645	-0.176787	-0.754649	-1.02647	0.446458	-1.34938	-0.28474
Gxylt1	0.733341	1.76414	0.726052	0.126887	-0.899052	-1.24377	0.2281	-1.1473	-0.288404
Fmr1	0.789496	1.63629	1.23505	-0.316048	-0.848636	-1.08626	-0.0438506	-1.02864	-0.337401
Il33	0.858861	1.41151	1.19238	-0.337175	-0.848133	-1.43094	0.343318	-0.861273	-0.328546
Skap2	0.880347	1.3604	0.874019	-0.504691	-0.91868	-1.16089	0.980457	-0.580491	-0.930473
Map3k8	1.01779	1.62555	0.609162	-0.308164	-0.612522	-1.15663	0.667294	-0.919393	-0.923086
Rod1	1.31346	1.23797	0.569909	0.0481814	-1.27293	-1.34181	0.558769	-0.733004	-0.380545
Lpgat1	1.50421	1.04862	0.369504	0.0787282	-1.29974	-1.36083	0.612171	-0.726657	-0.226008
Tbl1xr1	1.3159	1.26451	0.206668	0.177065	-1.41945	-1.24357	0.654554	-0.750751	-0.204934
Eif5b	1.40049	1.34977	0.173269	0.124036	-1.055	-1.27196	0.673361	-0.784968	-0.608998
Lass6	0.762489	1.49697	0.620746	0.0376462	-1.46668	-1.05278	0.82379	-0.841261	-0.380913
BC005537	0.755902	1.28379	0.634695	-0.0367823	-1.02458	-1.41375	1.04913	-1.09744	-0.150977
Sestd1	1.48855	0.972044	0.0348667	-0.130117	-1.2032	-1.27426	1.08876	-0.697417	-0.279231
Nfatc2ip	1.01975	1.19506	0.325798	-0.320599	-1.54888	-0.913784	1.19255	-0.803308	-0.146591
Clu	1.19625	1.17935	0.270771	-0.045121	-0.896942	-0.783629	1.12941	-1.41696	-0.633124
Hivep3	1.22701	1.16193	0.495401	-0.311634	-0.989668	-1.161	1.10499	-0.972766	-0.55425
D17Wsu92e	1.50033	1.18409	1.11678	-0.687353	-1.10311	-0.887748	-0.398683	-0.679234	-0.0450647
Cd74	1.45553	1.46806	0.822763	-0.685028	-1.10028	-0.991359	-0.36105	-0.492786	-0.115856
Tuba8	1.37655	1.46795	0.743415	-0.818796	-1.18187	-0.635181	-0.173637	-0.934064	0.155628
Prss22	1.24904	1.53668	0.925831	-0.662803	-1.11421	-0.904241	-0.133593	-0.83761	-0.0590952
Rpe	1.20201	1.39641	0.831791	-0.528512	-1.71392	-0.67776	-0.226054	-0.411923	0.127964
Clcf1	1.50829	1.21878	0.771547	-0.550086	-1.60068	-0.799534	-0.0783524	-0.343972	-0.125992
Cd93	1.50387	1.34556	0.593439	-0.0695	-1.30517	-0.981169	-0.539105	-0.755599	0.207687
Gpbp1l1	1.80473	1.15391	0.676616	-0.631723	-1.31365	-0.30629	-0.667178	-0.487318	-0.229096
Ttpal	1.72408	1.25411	0.650044	-0.483605	-1.31199	-0.810118	-0.375938	-0.510853	-0.135727
Ttll7	1.44062	1.33227	0.888566	-0.498888	-1.35855	-0.522567	-0.613357	-0.777401	0.109306
Trpc3	1.50353	1.01755	0.934744	-0.899661	-1.55004	-0.503788	-0.252537	-0.491966	0.242172
Pydc4	1.69314	0.788963	1.15715	-0.674408	-1.34399	-0.686143	-0.192813	-0.623446	-0.118451
Hspa4l	1.21439	0.943066	0.607165	-0.283068	-1.7397	-0.448956	-0.3729	-0.91308	0.993083
Serinc3	1.40933	0.986058	1.19085	-0.169249	-1.58354	-0.595407	-0.0345542	-0.661845	-0.541644
Phtf1	1.26102	1.08486	1.23055	-0.186872	-1.56412	-0.30758	-0.0160746	-0.836723	-0.665051
Stxbp1	1.26765	0.721276	1.06085	-0.163672	-1.80173	-0.410597	0.544284	-0.974891	-0.243177
Zfp292	1.10174	1.18752	0.919465	0.0256767	-1.6535	-0.941622	0.460227	-0.765291	-0.334205
Atp11b	1.32009	1.17152	0.730582	0.0585212	-1.58076	-0.923586	0.448929	-0.760432	-0.464866
Sphk1	1.3305	1.35429	0.541632	0.0768673	-1.52912	-0.515437	0.38115	-0.783565	-0.856317
Arrdc3	1.29728	0.934413	0.595171	-0.46211	-2.10039	-0.133231	0.440469	-0.0743432	-0.497258
Acot4	1.55173	0.888231	0.912834	-0.691162	-1.77625	-0.188586	-0.0741035	-0.0852828	-0.537411
Srsf10	1.45864	1.04805	1.27437	-0.0783934	-0.810026	-1.18814	-0.329319	-0.792304	-0.582887
Frrs1	1.36288	0.881455	1.37378	0.0364511	-0.880864	-1.43421	-0.277385	-0.570675	-0.491437
Mmp10	1.52216	1.02995	1.1765	-0.0214021	-1.11859	-0.880311	-0.173545	-0.725271	-0.809495
Atxn3	1.05423	1.32651	1.38271	0.00932889	-0.855685	-1.16225	-0.317639	-0.730736	-0.706473
Ccdc25	1.05299	1.31998	1.4295	-0.317572	-0.881994	-1.09855	-0.0842606	-0.756965	-0.663125
Smc2	1.08273	1.29076	1.34703	0.106672	-0.921648	-1.12016	-0.641684	-0.859777	-0.283918
Ppp4r2	1.04503	1.29438	1.42019	0.0246123	-0.776459	-1.09284	-0.940861	-0.657556	-0.316499
1600012F09Rik	1.25324	1.26702	1.30391	-0.154286	-0.961502	-0.831108	-1.07502	-0.34041	-0.46184
Naip2	0.884926	1.26063	1.15023	0.0429225	-0.765845	-1.43384	-0.672375	0.508116	-0.974767
Slc9a3r1	0.751258	2.08874	0.233664	-0.707871	-0.95154	-1.15148	-0.361407	-0.224783	0.323417
Bub1	1.07365	1.93711	0.359608	-0.661907	-0.734767	-1.20797	-0.677878	-0.224165	0.136321
Kpna3	1.1402	1.67647	0.688131	-0.699646	-0.513528	-1.4151	-0.623648	-0.472289	0.219416
Nek6	0.923152	1.90991	0.459311	-0.650629	-0.383962	-1.55618	-0.183153	-0.51289	-0.00555879
Aurkb	0.83227	1.89402	0.747469	-0.325076	-0.753884	-1.25221	-0.900908	0.0771805	-0.318863
Lrrc8c	1.28415	1.77857	0.180541	-0.435436	-0.430586	-1.39707	0.254952	-0.601914	-0.63321
Lrch2	0.606289	2.23625	0.282072	-0.002722	-0.255751	-1.25277	-0.447995	-0.71952	-0.445857
Col5a2	0.857617	1.76808	0.142678	0.992189	-0.556466	-0.454238	-0.810364	-1.16989	-0.769601
Angpt1	1.01001	1.67602	0.479627	0.75169	-0.80889	-0.858994	-0.631641	-1.18035	-0.437478
Scamp1	0.306221	2.07121	0.771751	0.3655	-1.00226	-0.71086	-0.504675	-1.0237	-0.273191
Scarb1	1.58324	1.10464	0.781265	0.230301	-0.592327	-1.32027	-0.26488	-1.14008	-0.381891
Lats1	1.71107	0.979374	0.734732	0.0235095	-0.630338	-1.11849	-0.153584	-1.36696	-0.179315
Srebf2	1.57702	0.894844	1.00697	0.243593	-0.42123	-0.84407	-0.352687	-1.50515	-0.599296
Ap4e1	1.43357	1.13543	1.08594	-0.0122395	-0.294474	-0.924445	-0.684568	-1.39587	-0.343339
Insig1	1.84614	0.461665	0.827001	0.669405	-0.504351	-0.764578	-0.870465	-1.19582	-0.468997
Sc5d	1.97439	0.52739	0.829313	0.308366	-0.529295	-0.939635	-0.629727	-1.15389	-0.386919
Papd5	1.95612	0.433682	0.765135	0.276674	-0.0315967	-0.771984	-0.653407	-1.40568	-0.568943
Aig1	1.52805	1.11125	1.07098	0.0916598	-0.639075	-0.710553	-0.380414	-1.22356	-0.848333
Gm9938	1.61625	1.14894	0.851291	0.109518	-0.643328	-0.643639	-0.242363	-1.22371	-0.972959
Nab1	1.61039	1.10879	0.783825	0.336806	-0.389953	-0.627572	-0.745129	-1.34762	-0.729537
Fabp4	1.54104	1.29686	0.726565	0.163274	-0.493353	-0.552379	-0.519754	-1.42206	-0.740188
Stc2	1.70839	0.914372	0.965809	-0.049906	-0.794082	-0.144723	-0.544407	-1.38109	-0.674366
Arpc1b	1.8016	0.724027	0.791395	0.491698	-0.646794	-0.592994	-0.358408	-1.20605	-1.00447
Adra2a	1.64208	0.99968	0.838812	0.460692	-0.946628	-0.524154	-0.477281	-1.03718	-0.956019
Adamts7	1.34662	1.01196	0.557385	1.07536	-0.617669	-0.797809	-0.501616	-1.40769	-0.666527
Nfkbiz	1.58927	0.731351	0.639151	0.631153	-0.35227	-0.237876	-0.437356	-1.76903	-0.794385
Scd1	1.7881	0.990517	0.650322	0.321523	-0.399743	-0.454626	-0.982938	-1.21401	-0.699143
Syt7	1.6046	1.08339	0.44834	0.658332	-0.322214	-0.406171	-1.06213	-1.32756	-0.676593
Skil	1.93297	1.09943	0.268257	0.0835837	-0.281185	-0.240108	-0.904689	-1.2065	-0.751754
Tnfrsf9	1.84975	1.22927	0.0994743	0.324486	-0.557408	-0.304178	-0.51507	-1.17031	-0.956018
Scd2	1.99316	0.883492	0.579142	-0.125859	-0.322029	-0.447939	-1.01459	-1.20145	-0.34393
Tmem68	2.07217	0.845527	0.588897	-0.118477	-0.803937	-0.277018	-0.82638	-0.993396	-0.48739
D19Ertd737e	2.0897	0.570907	0.42715	0.0344611	-0.640478	0.0905243	-0.688487	-1.41983	-0.463946
Tm9sf3	1.67067	1.22937	0.223896	0.62373	-0.647016	-0.679287	-0.730197	-1.30115	-0.390008
Atp8b4	1.39712	1.49037	0.177411	0.463436	-0.220734	-0.399479	-1.13277	-1.39423	-0.381113
Kdelc1	1.67166	1.01835	0.271348	0.297835	0.237571	-0.824853	-0.978578	-1.50926	-0.184074
Tm4sf4	1.48169	1.07977	0.40182	0.636988	-0.057965	-0.596713	-0.908088	-1.65582	-0.381692
Kcnk10	1.85085	0.825633	0.212557	0.45075	-0.675881	-0.960928	-0.665592	-1.31964	0.282242
Gpr84	1.94016	0.692561	-0.0513217	0.465926	-0.282231	-0.717432	-0.484483	-1.64344	0.0802619
Sod2	1.81422	1.11471	0.119423	0.268754	0.182304	-0.836748	-0.847815	-1.28196	-0.532889
Tcp10b	1.65548	1.14137	0.314108	0.222685	0.35529	-0.611471	-0.950333	-1.33077	-0.796365
Zfp467	1.64046	1.43772	0.423966	-0.0935801	-0.0578153	-0.597603	-0.971368	-1.17544	-0.606339
Setd8	1.57169	1.01806	0.428279	0.257349	0.445595	-0.481067	-1.3202	-1.29759	-0.622122
Klra2	1.32241	1.16687	0.475004	0.151158	0.715654	-0.551023	-1.28883	-1.2971	-0.694152
Dgat2	1.41025	1.53221	0.244514	-0.0985997	0.322816	-1.21514	-0.295485	-1.1951	-0.705462
Serpina3i	1.0585	1.40845	0.436634	0.199651	0.56328	-1.13797	-0.200358	-1.55313	-0.775057
Lamb1	1.76565	1.02642	0.0332464	-0.0429887	0.104713	-0.423704	-0.0159939	-1.78958	-0.657764
Morc3	1.90023	0.374963	0.258652	0.574523	-0.0139619	-0.300304	-0.0803918	-1.54738	-1.16633
Zc3h7a	1.95324	0.355895	0.454981	0.575667	-0.175534	-0.588272	-0.0719588	-1.28872	-1.21529
Chic2	1.86648	0.538236	0.185322	0.648917	0.037127	-0.5246	-0.268362	-1.6536	-0.829528
Rasl12	2.06338	0.519061	-0.191122	0.480009	0.259219	-0.299146	-0.442543	-1.2059	-1.18296
Abca1	1.41362	0.55346	0.401939	0.442261	0.445086	-0.488058	0.316756	-1.68872	-1.39635
Slc7a2	1.31181	0.538232	0.220703	1.19001	0.333012	-0.676245	-0.109206	-1.3799	-1.42841
Cerk	1.14967	1.2161	0.434345	1.07028	-1.08255	-0.588933	-0.0356698	-1.02989	-1.13336
Fut4	1.46003	1.16071	-0.11697	0.806983	-0.562241	-0.242959	0.0544861	-1.59717	-0.962862
Xpnpep2	1.24454	1.44435	0.222664	0.50767	-0.985485	-0.0351565	-0.0222155	-1.54956	-0.826806
Lrrc32	0.814606	1.27574	0.454495	0.701679	-0.174409	-0.42154	0.38631	-1.66222	-1.37466
Crispld2	1.66752	1.058	0.43319	0.539772	-0.721732	-0.889226	0.0170615	-1.26964	-0.834939
Ptar1	1.6073	1.21773	0.475978	0.394408	-0.627927	-0.87113	-0.0510634	-1.29025	-0.855045
4933426M11Rik	1.55718	1.06873	0.502341	0.517915	-0.388005	-1.03018	0.0228756	-1.41428	-0.836583
Trps1	1.66814	0.750309	0.439174	0.724537	-0.546408	-0.954793	0.177308	-1.39838	-0.859889
Vps37a	1.9561	0.625958	0.495718	0.373192	-0.554847	-0.787966	-0.00599222	-1.4106	-0.691566
Slc35a3	1.94942	0.837142	0.407098	0.31845	-0.783451	-1.09315	0.0329557	-0.956911	-0.711553
Slc39a9	1.95742	0.862433	0.214912	0.274873	-0.916982	-0.984817	0.12657	-1.15387	-0.380545
Pmepa1	1.83351	1.13957	0.399165	0.183197	-0.960292	-0.693887	-0.089285	-1.1222	-0.689775
Dock8	1.83825	1.02092	0.415579	0.356244	-0.742035	-0.78354	-0.170437	-1.29402	-0.640963
Ide	2.12462	0.748623	0.332934	0.020262	-0.568289	-1.25647	-0.107828	-0.825749	-0.4681
Reep4	2.0242	0.659464	0.442326	-0.0943505	-0.56311	-1.48045	0.194181	-0.685357	-0.496901
Mbtps2	2.0362	0.507427	0.511663	0.147997	-0.637758	-1.23958	0.238803	-0.992313	-0.572442
Hp	2.03902	0.81195	0.0835893	0.313784	-0.280341	-1.05872	-0.0292602	-1.17463	-0.705393
Saa1	2.06146	0.626882	-0.000548023	0.368804	-0.329048	-1.05588	0.285549	-1.00454	-0.952683
Nvl	1.71213	0.956054	0.921352	-0.127122	-0.66028	-1.11162	0.070774	-1.05637	-0.704924
Tuba4a	1.51377	1.10091	0.867594	0.00562384	-0.669102	-1.21589	0.262934	-0.995561	-0.870281
Ccnl1	1.63596	0.72317	1.17778	0.041054	-0.62991	-1.2644	-0.0155273	-0.945386	-0.722737
5830418K08Rik	1.67114	0.847443	0.646301	0.410688	-0.54199	-1.54788	0.068762	-0.768574	-0.785899
Crispld1	1.69412	0.876609	0.852283	0.359786	-0.732965	-1.28207	-0.159958	-0.861544	-0.746254
Lgi3	1.58181	1.01436	0.903745	0.029077	-0.619722	-1.46559	-0.0724804	-0.390642	-0.980554
Rhoq	1.3855	0.90332	1.08593	0.0727075	-1.11373	-1.32992	0.2683	-0.328087	-0.94402
Cyp4v3	1.50323	0.5637	1.13047	0.154671	-0.895772	-1.22592	0.429466	-0.474006	-1.18584
Otud5	1.88836	0.263096	1.00794	-0.0146863	-0.768986	-1.07522	0.397521	-0.820563	-0.877463
Slc9a4	1.85649	0.172892	1.05696	-0.00618466	-0.922008	-1.23996	0.36088	-0.451774	-0.827292
Isg20	1.57183	0.251099	1.22222	0.0624381	-0.726002	-1.35806	0.569891	-0.834963	-0.758448
Ccnl2	1.70645	0.310713	1.14658	0.159434	-0.547417	-0.855309	0.266818	-0.813486	-1.37378
Sat1	1.69344	0.371624	0.826244	0.621628	-1.135	-1.21555	0.299187	-0.759494	-0.702073
Hspb8	1.9386	0.120752	0.880503	0.406784	-1.19776	-0.952527	0.1593	-0.666453	-0.689204
Tgfb1	1.984	0.379671	0.788739	0.362127	-1.12995	-0.841347	-0.119946	-0.433752	-0.989534
Chchd10	1.99785	-0.209967	0.969335	0.649111	-0.821997	-0.915199	-0.487083	-0.868902	-0.313145
Foxp1	1.7557	0.732428	0.28447	0.887716	-0.645452	-0.575733	-0.0920813	-1.19862	-1.14842
5730508B09Rik	1.84645	0.484542	0.564913	0.848884	-0.762614	-0.699293	-0.275204	-0.726018	-1.28167
Gramd1b	1.73362	-0.0770838	0.941173	0.786376	-0.33851	-0.237586	-0.264511	-1.20556	-1.33792
Cpt1b	1.82853	0.00320492	0.714104	1.06128	-0.891552	-0.373813	-0.404277	-0.818255	-1.11922
Foxred1	2.05115	0.170053	1.09895	-0.119333	-0.137435	-0.875492	-0.779625	-0.423813	-0.98445
Uox	1.88535	0.563664	1.01898	-0.0344118	-0.328552	-1.15374	-0.395168	-0.402392	-1.15374
Amz1	1.98173	0.0843098	1.28489	-0.362325	-0.524904	-1.02734	-0.340692	-0.20422	-0.89145
Phyhd1	2.00287	-0.122961	0.827497	0.166171	0.00333158	-0.732718	-0.277107	-0.261098	-1.60598
Ch25h	2.27676	-0.297547	0.18164	0.391199	0.4126	-0.976512	-0.410252	-0.83785	-0.740043
Wapal	1.61207	1.23505	0.91833	-0.192348	-0.858691	-0.69783	-0.75284	-1.08239	-0.181349
Tmed5	1.48127	1.20946	1.05418	-0.208708	-0.635077	-0.69456	-0.97139	-1.16349	-0.0716817
Ttc39c	1.4243	1.28853	0.948398	0.1404	-0.736864	-0.739367	-1.03546	-1.09113	-0.198804
Zdhhc5	1.22807	1.41975	1.07032	-0.272155	-0.605541	-0.617122	-1.12494	-1.11499	0.0166204
Adipor2	1.53304	1.17687	1.01305	-0.25068	-0.359677	-0.342784	-1.0862	-1.24902	-0.434603
Fgfr1op2	1.47621	1.2851	1.05637	-0.266799	-0.373458	-0.778228	-1.10636	-0.944192	-0.348653
Abi3	1.13315	1.30893	1.2626	-0.465985	-0.953949	0.130002	-1.18591	-0.841415	-0.387416
Bank1	1.15467	1.44613	0.999866	-0.426869	-0.520441	0.131594	-1.05228	-1.3648	-0.367884
Errfi1	1.17144	1.70673	0.926967	-1.07288	-0.612962	-0.331441	-0.567463	-0.886048	-0.334343
Gfpt2	1.0698	1.54086	1.27348	-0.875927	-0.88072	-0.338454	-0.437525	-0.896357	-0.455158
Slc30a7	1.18111	1.70825	1.02544	-0.769021	-0.532776	-0.691192	-0.496869	-0.61187	-0.813071
Dcaf10	0.989677	1.86486	0.833888	-0.812598	-0.63384	0.0568068	-0.778315	-0.861432	-0.659044
Ranbp2	0.883007	1.46966	1.25061	-0.271525	-0.369278	-0.443469	-0.878996	-1.51721	-0.12279
Cdr2	1.04991	1.56292	1.13076	-0.281142	-0.482687	-0.388909	-0.960388	-1.29561	-0.334847
Ccl5	0.827472	1.44818	1.33137	-0.0737947	-0.217894	-0.497716	-0.877594	-1.46642	-0.473607
Il20rb	0.552922	1.52423	1.18854	0.306924	0.0631919	-0.601772	-0.806582	-1.54192	-0.685536
Chd4	0.691898	1.67401	1.18648	-0.334632	-0.583739	-0.709645	-0.0107936	-1.4686	-0.444976
Hipk2	0.405541	1.90973	0.890191	-0.192751	-0.530953	-0.485924	-0.106098	-1.66737	-0.222367
Celf1	1.21933	1.39084	1.07217	-0.462226	-0.376386	-1.21505	-0.289834	-1.22499	-0.113855
Stard4	1.37755	1.38096	0.907484	-0.339601	-0.335096	-1.14302	-0.705482	-1.15747	0.0146788
Nsun4	1.10194	1.56445	1.01748	-0.510559	0.111007	-0.994669	-0.902753	-1.05669	-0.330216
Nckap1	1.02346	1.4134	1.35872	-0.446355	-0.554953	-1.02483	-0.88172	-0.879624	-0.00810588
Suz12	0.674867	1.68172	1.27767	-0.506972	-0.513146	-0.740271	-0.848403	-1.13322	0.107747
Smg1	1.13069	1.34758	1.1059	-0.94948	-0.490278	-0.716079	0.259211	-1.36185	-0.325692
Kcna1	1.13452	1.39344	0.97967	-0.857896	-0.635563	-0.484366	0.461747	-1.34256	-0.649004
Gatad2b	1.04558	1.38283	0.723066	-0.611048	-0.914204	-0.171027	0.397886	-1.75057	-0.102509
Ubr4	0.766259	1.22123	1.46318	-0.91867	-0.319647	-0.504109	0.230379	-1.53856	-0.400069
Baz2a	1.00161	1.23289	1.00221	-1.02969	-0.177217	-0.726273	0.300695	-1.66119	0.0569598
Ankrd17	1.02802	1.53625	0.563477	0.0439196	-0.302979	-0.605659	0.158282	-1.86205	-0.559261
Setd1a	0.983866	1.15116	1.05697	-0.160723	-0.104264	-0.332937	0.0278461	-2.01952	-0.602396
Rtn4rl2	1.31402	1.42455	0.874104	-0.498422	-0.0991172	-0.463875	-0.235464	-1.52507	-0.790729
Kdm2a	0.760037	1.45674	0.816838	-0.669257	0.17477	0.0429609	-0.0464273	-1.95186	-0.583801
Efnb2	0.882052	1.49413	0.908851	-1.2879	0.237521	-0.255413	-0.109394	-1.49307	-0.37677
1110018G07Rik	1.68826	0.474369	1.20986	0.143153	-1.02507	-0.316851	-0.0983018	-1.28868	-0.78675
Sox5	1.73338	0.785638	0.885389	0.230429	-1.19356	-0.536912	-0.00425952	-1.05754	-0.842566
Pde3a	1.40668	0.4517	1.21851	0.397022	-1.05082	-0.442419	0.357526	-1.08711	-1.25109
Ddi2	1.71645	0.675398	0.997258	-0.0303626	-0.755291	-0.727638	0.210087	-1.41888	-0.667019
Pyhin1	1.91629	0.525151	1.00317	-0.204783	-0.559525	-0.584159	0.068196	-1.11856	-1.04577
Samd4b	1.63355	0.787216	0.791346	-0.0521448	-0.557472	-0.34372	0.347659	-1.5643	-1.04214
Wdr59	1.43622	0.935506	1.08465	-0.303614	-0.343587	-0.868167	0.298961	-1.5222	-0.717781
BC024978	1.49906	1.15906	0.832591	-0.256437	-0.0831036	-0.875958	0.006631	-1.51022	-0.77162
Atxn7	1.74669	0.904198	0.714444	-0.250281	-0.361587	-0.861055	0.334265	-1.33188	-0.894793
Gda	1.32643	1.01579	1.30016	-0.598292	-0.0917486	-0.952042	0.104674	-0.954507	-1.15046
Hltf	1.58669	1.23537	0.818074	-0.286348	-0.227098	-0.744625	-0.119408	-1.01972	-1.24293
Tcirg1	0.95553	0.450431	1.95041	-0.428143	-0.475323	-0.974342	0.287264	-0.683183	-1.08265
Odz4	1.21446	0.596063	1.57633	-0.0810424	-0.684432	-1.30281	0.346533	-0.776417	-0.888681
Atxn2l	1.06083	0.823296	1.64876	-0.456653	-0.166221	-0.988061	0.0566436	-1.38004	-0.598555
Ttll11	1.82744	0.246206	1.32277	0.0191348	-0.296447	-1.2105	-0.407471	-0.794375	-0.706761
Rasal1	1.50824	0.608224	1.49312	0.094126	-0.486104	-1.10593	-0.576424	-1.03864	-0.496609
Ccrl2	1.34426	0.384355	1.417	0.477732	-0.0191271	-1.23138	-0.284856	-0.918534	-1.16945
Rassf8	0.947646	0.400665	1.29235	0.950086	-1.11694	-0.2104	0.185281	-1.37337	-1.07531
BC005561	0.713879	0.463902	1.84801	0.410782	-0.943779	-0.159998	0.00994572	-1.29514	-1.0476
BC030336	1.43065	0.637279	1.29706	0.561682	-1.18704	-0.408477	-0.450753	-0.90682	-0.973576
Eml2	0.953194	0.817374	1.63729	0.395033	-1.31393	-0.266474	-0.440635	-0.829778	-0.952077
Ankrd34a	0.835448	1.13071	0.915949	0.780222	-0.973179	0.247331	-0.338221	-1.49624	-1.10202
Fam178a	0.53678	1.2094	1.29823	0.25969	-0.260421	-0.0910483	0.0203359	-1.46937	-1.50359
Fam26f	0.978068	0.872395	1.19223	-0.0724432	-0.523101	-0.01617	0.335376	-0.816207	-1.95015
Plekha4	0.790727	-0.277305	2.05911	0.0853947	-0.222598	-0.163471	0.128236	-1.00298	-1.39712
Hif1a	1.75956	1.45412	0.459296	-0.497891	-0.803637	-0.919789	-0.341339	-0.785236	-0.325085
Pdk1	1.78703	1.45769	0.312673	-0.420228	-0.70602	-1.03213	-0.126182	-0.730193	-0.542636
Stil	1.81313	1.17456	0.576234	-0.413862	-0.712949	-1.37801	-0.301118	-0.528093	-0.229893
Stat5a	1.74396	1.27414	0.748834	-0.423855	-0.645213	-1.18857	-0.532392	-0.437678	-0.539228
Tnc	1.54942	1.62464	0.596116	-0.62324	-0.590401	-0.813621	-0.507011	-0.921863	-0.314039
Slc16a1	1.64084	1.43865	0.637427	-0.417639	-0.452985	-1.07922	-0.354863	-0.992612	-0.419598
Larp4	1.5252	1.38077	0.89227	-0.541896	-0.673724	-1.01106	-0.492573	-0.973393	-0.105595
2010002N04Rik	1.49246	1.63687	0.353737	-0.636983	-0.522785	-1.25613	-0.0999337	-0.825249	-0.141988
Traf3ip2	1.51202	1.72663	0.376535	-0.775839	-0.79176	-0.830243	-0.316658	-0.739098	-0.161589
Arid3a	1.09808	1.93325	0.392585	-0.563896	-0.502747	-0.91084	-0.36003	-1.16871	0.0823116
Sec63	1.56076	1.49409	0.328188	-0.440143	-0.407704	-0.925673	-0.133592	-1.40885	-0.0670794
Il13ra2	1.51047	1.43129	0.587596	-0.379278	-0.697513	-0.998611	-0.126345	-1.29617	-0.0314473
Sec24a	1.45144	1.54051	0.42782	-0.495712	-0.727306	-0.853478	0.223795	-1.31082	-0.256247
Tsku	1.71511	1.65331	-0.128776	-0.707789	-0.630565	-0.83253	0.014187	-0.796533	-0.286412
Kcnj15	1.50559	1.72609	0.165725	-1.00204	-0.527287	-0.607382	0.00815001	-1.00204	-0.266813
Ankrd37	1.75366	1.30494	0.19071	-0.90963	-0.320031	-0.993445	0.0681738	-1.1239	0.0295235
Alkbh5	1.4916	1.567	0.59915	-0.484393	-0.325457	-0.596137	-0.635301	-1.33485	-0.281607
Akap11	1.64324	1.51547	0.338767	-0.738832	-0.293471	-0.419882	-0.782525	-1.21035	-0.0524246
Blm	1.71052	1.20707	0.849054	-0.659564	-0.431013	-0.645175	-0.874577	-1.03953	-0.116785
Fam110c	1.81847	1.21175	0.700137	-0.50436	-0.456169	-0.636399	-0.897783	-1.00366	-0.231985
Zfp106	1.19414	1.62257	0.673892	-0.737859	-0.358541	-0.736846	-0.773558	-1.24262	0.358816
Xpo7	1.34351	1.57884	0.506407	-0.858301	-0.137596	-0.902739	-0.561663	-1.22275	0.254293
Cep170	1.55756	1.46829	0.31462	-0.818206	-0.530502	-0.657916	-0.444939	-1.26371	0.374797
Mapk6	1.83688	1.13839	0.431679	-0.578372	0.167505	-0.549515	-0.987147	-1.19855	-0.260873
Setdb1	1.66364	1.44859	0.4606	-0.675023	0.0615095	-0.552439	-0.760477	-1.15746	-0.488935
Setd5	1.65335	1.05745	0.805919	-0.854166	0.0451621	-0.29975	-0.565573	-1.49573	-0.346662
Oxsr1	1.89422	0.847508	0.611799	-0.914299	0.312532	-0.966043	-0.56198	-1.05227	-0.171467
Tpi1	1.71185	1.59013	0.147916	-1.12507	-0.325656	-0.706824	-0.65356	-0.4105	-0.228282
Pfkl	1.65463	1.67482	0.319493	-0.868579	-0.519023	-0.635581	-0.631673	-0.62777	-0.366325
Pgm2	1.94232	1.47723	-0.0839476	-0.782184	-0.207424	-0.616401	-0.638556	-0.560264	-0.530768
Rgs16	1.82668	1.59235	-0.167989	-0.866003	-0.497807	-0.739193	-0.184549	-0.312878	-0.650614
Ext1	1.93548	1.15827	0.301055	-1.27392	0.00732761	-0.553198	-0.717921	-0.499431	-0.357651
P4ha2	2.03816	1.15746	0.0901279	-0.940617	0.0244069	-0.704924	-0.910906	-0.345257	-0.408453
Ptpn2	1.90315	1.21796	0.334171	-0.864653	-0.334003	-0.488134	-1.19424	-0.504352	-0.0698961
1110059E24Rik	2.16333	0.953097	0.370414	-0.771058	-0.500801	-0.735779	-0.811552	-0.38942	-0.278235
Rab6	2.23662	0.875862	0.231654	-0.450359	-0.601297	-0.115812	-0.791454	-0.773597	-0.61162
Ddit4	2.01572	1.08859	0.422748	-0.544696	-0.582408	-0.16369	-1.13624	-0.465253	-0.634776
Icmt	1.6639	1.52094	0.373171	-0.635646	-0.81675	-0.186381	-0.981144	-0.836759	-0.101325
Snapc1	1.55802	1.607	0.486145	-0.377944	-0.842792	-0.0986246	-0.935562	-0.841185	-0.555048
Csrnp1	1.72375	1.22866	0.837716	-0.840911	-0.995332	-0.379942	-0.395807	-0.838521	-0.339618
Malt1	1.75277	1.02132	0.94163	-1.03717	-0.716064	-0.10747	-0.576912	-0.991496	-0.286609
Rabggta	1.96241	1.22637	0.318034	-1.12134	-0.454542	-0.172316	-0.503514	-0.694434	-0.560672
Mctp2	1.67398	1.37393	0.524853	-1.14419	-0.182576	-0.401029	-0.183306	-1.07282	-0.588855
Sec23ip	1.55522	1.57088	0.190827	-0.224484	-0.0295056	-0.954617	-0.651327	-1.28931	-0.167687
Acvr1b	1.50027	1.67177	0.183935	-0.193103	-0.261398	-0.910668	-0.158913	-1.29172	-0.540181
Sulf1	1.45764	1.62604	0.295928	-0.125582	-0.087929	-0.48097	-0.500202	-1.44723	-0.737689
Rdh10	1.23647	1.87855	0.137652	-0.207952	-0.0501728	-0.171485	-0.710135	-1.29265	-0.820274
Gsto1	1.6731	1.68409	-0.360999	-0.315845	-0.216703	-0.475025	-1.1258	-0.764752	-0.0980648
Elk3	1.92894	1.38495	-0.14934	-0.408942	-0.458428	-0.249574	-0.877989	-1.05612	-0.113492
P4ha1	1.65177	1.41497	0.259748	-0.947041	-0.360046	0.256322	-1.25888	-0.444868	-0.571979
Sprr2e	1.62224	1.47451	0.148382	-0.815807	-0.429023	0.197296	-1.40105	-0.356895	-0.439655
Clybl	1.8302	1.33818	0.0580855	-0.710825	-0.20835	-0.0494781	-1.04814	-0.117559	-1.09211
Chmp5	1.4834	1.44391	0.125674	-0.262904	0.107804	0.220396	-1.43579	-0.626001	-1.05648
Ufsp2	1.7684	1.2481	-0.069921	-0.498574	0.188908	0.168843	-1.43382	-0.699314	-0.672627
Rlf	1.61977	1.34145	0.164576	-1.10044	0.307057	0.149333	-1.1599	-0.700936	-0.620906
S100pbp	1.50573	1.33321	0.396302	-0.983192	0.0946943	0.354169	-0.707361	-0.672939	-1.32061
Bnip3l	1.58437	1.72926	-0.369456	-0.373355	-0.356306	0.241177	-0.730944	-0.953887	-0.770863
Dnajc22	1.65621	1.42398	0.315833	-0.634062	-0.464663	0.230808	-0.493392	-1.28644	-0.748279
Lman1	1.68449	1.12759	0.881534	-1.10299	-0.375162	-0.0180394	-1.00255	-0.73403	-0.460847
C80913	1.91841	0.869886	0.505472	-1.47981	0.0549648	-0.205421	-0.770427	-0.646624	-0.24645
Tmem128	1.7962	0.857159	0.635425	-1.13375	0.255567	-0.341852	-1.17183	-0.00562474	-0.891294
Mettl10	1.70103	0.770096	1.02562	-0.874442	0.0965435	-0.0706136	-1.30042	-0.4699	-0.877902
Tmem161b	1.91196	1.00506	0.674587	-0.400423	-0.0572644	-0.382556	-1.06784	-0.918733	-0.764791
Col5a3	1.95257	1.06924	0.196534	-0.419071	0.343101	-0.444288	-1.10566	-0.906831	-0.685592
Gsto2	1.98579	0.847285	0.259055	-0.634821	0.146453	0.275194	-0.89335	-1.02506	-0.960546
Tpd52	2.0776	0.76766	-0.116825	-0.540791	0.531912	-0.258458	-1.34804	-0.586488	-0.526573
1190003J15Rik	2.14023	0.957708	-0.0860854	-0.855591	0.242081	-0.388332	-0.855591	-0.855591	-0.298825
Gja1	2.04458	0.889089	0.350423	0.209277	-0.659798	-0.468883	-0.360089	-1.18748	-0.81712
Tmem2	2.16708	0.913645	0.256355	-0.0213582	-0.575367	-0.557869	-0.494527	-1.05779	-0.630161
Cnot7	2.11287	0.905377	0.331734	0.124043	-0.682697	-0.765841	-0.339178	-0.867499	-0.818811
Kpna1	2.19379	0.773249	0.21229	0.076331	-0.290609	-0.78098	-0.363177	-1.07532	-0.745576
Ppp1r3b	1.97126	1.03856	0.219523	0.214924	-0.421522	-0.66157	-0.229977	-1.09659	-1.0346
5730559C18Rik	2.23977	0.847689	0.0645849	-0.1114	-0.426127	-0.299229	-0.46018	-1.07699	-0.778114
Gm17296	2.033	0.538626	0.590945	0.242914	-0.263701	-0.395118	-0.391064	-1.26605	-1.08955
Slc30a1	2.18043	0.581262	0.606533	-0.169022	-0.41423	-0.529238	-0.259756	-1.0107	-0.985274
Inhba	2.20129	0.54857	0.291346	0.282524	-0.230247	-0.393399	-0.820982	-1.08336	-0.795747
Klc2	2.16996	0.478098	0.375622	0.109963	-0.151933	-0.297039	-0.693397	-1.40479	-0.586487
Slc30a9	1.80869	0.775236	0.41219	0.688218	-0.618615	-0.16508	-0.560988	-1.27578	-1.06387
Ero1lb	2.14825	0.324065	0.448859	0.347277	-0.635475	-0.0306083	-0.442539	-1.19143	-0.968406
Rcor1	1.8708	0.787183	0.488393	0.101515	-0.920839	-0.258616	0.1631	-1.43222	-0.799322
Sema4a	1.74344	0.947637	0.559479	0.304216	-0.88001	-0.272051	-0.135453	-1.46515	-0.802106
Sc4mol	2.12624	0.476503	0.652874	-0.0386461	-0.0454582	-0.846002	-0.850456	-1.1218	-0.353256
Clcn3	2.19448	0.268196	0.801762	-0.267487	-0.195422	-0.617077	-0.646343	-1.20398	-0.334137
Parp8	1.93419	0.623504	0.669969	-0.341097	0.306152	-0.315237	-0.550658	-1.38874	-0.938086
Heatr2	1.82879	0.546811	0.798127	-0.420006	0.16811	-0.51253	-0.337666	-1.7402	-0.331436
Itpripl2	2.00496	0.0916205	0.922496	-0.0267185	-0.00943305	-0.757004	-0.0185438	-1.33849	-0.868885
Slc29a2	2.23576	0.0647844	0.626554	-0.235124	-0.339173	-0.357217	0.131545	-1.17982	-0.947317
Plk3	1.96796	0.351025	0.935609	-0.195965	-0.337962	0.165495	-0.978624	-1.2466	-0.660929
Wfs1	2.13066	-0.184719	0.891737	-0.223925	-0.248443	0.229226	-0.629351	-1.24668	-0.718514
Fgf21	1.94068	-0.120034	1.20553	0.241564	-0.132765	-0.367913	-0.93914	-0.946312	-0.881608
Gpr39	1.8557	0.413198	0.609571	0.0849626	0.395227	-0.0518535	-0.743188	-1.35084	-1.21278
Tm7sf2	1.67349	0.370988	0.771011	0.234697	0.596973	-0.219738	-0.958359	-1.37775	-1.09131
Zfp238	1.79878	0.381242	0.81517	0.367092	0.139627	-0.403328	-0.511092	-1.41384	-1.17366
Tnfrsf11b	1.2475	0.583383	0.714963	0.106786	0.479123	0.212987	-0.0955806	-1.72011	-1.52905
Ccbe1	1.64139	0.685289	0.390633	-0.145762	0.561493	-0.201479	0.0002457	-1.39983	-1.53199
Rab11fip1	1.66267	0.625032	0.234592	0.234045	0.476196	0.00708904	-0.362922	-1.78391	-1.09279
Map3k15	1.55681	0.282521	0.886074	-0.489566	0.399787	0.451867	-0.242099	-1.44494	-1.40045
Slc26a7	1.98936	-0.0987586	0.74278	-0.355066	0.265626	0.412699	-0.628059	-1.22927	-1.09931
Chst11	1.814	1.16128	0.457789	-0.141234	-0.148476	-0.149313	-0.75213	-1.18493	-1.05699
Cox17	1.94879	1.06517	0.315189	-0.275496	0.0353915	-0.310086	-0.552245	-1.03961	-1.18711
Prdm1	1.8054	1.15019	0.45528	-0.0637593	-0.134988	-0.576381	-0.304082	-1.31588	-1.01578
Sp3	1.63428	1.02282	0.871646	-0.156443	0.0777622	-0.513913	-0.511519	-1.09504	-1.32959
Slc12a8	1.58321	1.06196	0.936323	-0.563771	0.30046	-0.616418	-0.504526	-1.22596	-0.971272
Ppm1j	1.91252	0.63148	0.306171	-0.166228	-0.0111012	0.285127	-0.245789	-1.32179	-1.39039
Ccdc88b	1.92771	0.882032	0.639314	-0.437525	-0.386905	-0.208824	-0.115772	-0.985642	-1.31439
Dcbld2	1.50065	0.905797	-0.22403	0.0726727	1.02174	-0.082067	-0.724878	-1.58551	-0.884373
Tab2	1.58498	1.25325	0.0612851	-0.212861	0.506902	-0.1992	-0.641137	-1.61913	-0.734081
Fam3c	1.66835	1.15475	-0.52466	-0.0516914	0.474826	0.266046	-0.602762	-1.41816	-0.966699
Atp7b	1.21548	0.875575	0.345507	-0.173175	0.801025	0.58871	-0.883296	-1.35179	-1.41804
Car12	1.60016	0.735458	0.550759	-0.148694	0.0762073	0.442833	-0.867816	-1.8128	-0.576108
Rgs7bp	1.76198	0.681709	0.530082	-0.0432906	0.0678246	0.0620529	-0.663584	-1.84134	-0.555434
Rnf128	1.64371	0.772183	0.142936	-0.669453	0.970126	-0.0776883	-0.784836	-1.57997	-0.417003
Grcc10	1.89125	0.607175	0.129469	-0.365794	0.506316	0.380752	-1.40512	-0.932931	-0.811118
Gbe1	2.09173	0.452733	0.132271	-0.167597	0.338552	0.233124	-1.19295	-0.945423	-0.942442
Obfc2a	1.96848	0.534272	0.198748	-0.288001	0.563499	-0.0215534	-1.24324	-1.29641	-0.4158
Tecr	1.79869	0.298142	0.258035	0.274441	0.726306	-0.0879055	-1.62217	-0.74114	-0.904397
Relb	1.65481	0.0299508	0.519815	0.256339	0.88188	0.147035	-1.15966	-1.34644	-0.983739
Coq10b	1.75717	1.02988	-0.0235821	0.0614571	0.0300456	0.114194	-1.38887	-1.36278	-0.217509
Zfp52	1.54325	1.14597	-0.536284	0.367352	0.37479	0.0103496	-1.46929	-1.24341	-0.192725
Fyttd1	2.08032	0.98714	-0.256581	0.14428	0.0735389	-0.314284	-1.04509	-0.73112	-0.938209
Egln3	2.07065	0.936999	-1.0446	-0.129904	0.290355	0.0706802	-0.842709	-0.758435	-0.593034
Pi15	1.67332	0.576101	0.337846	1.02136	0.0510429	-0.503455	-0.932048	-0.874881	-1.34929
Slc39a4	1.4788	0.811496	0.413446	1.10783	-0.0384414	-0.576224	-0.994085	-1.1666	-1.03622
Cxcl2	1.81187	0.412093	0.230597	1.05187	-0.0949227	-0.652529	-0.77641	-1.42991	-0.552656
Cxcl3	1.73036	0.626015	-0.10931	1.23348	-0.114134	-0.794392	-0.95452	-1.13829	-0.479202
Slc11a1	1.9699	0.516555	-0.137922	1.07874	-0.261286	-0.598825	-1.0013	-0.697605	-0.868256
Pold4	2.0039	0.861068	0.491002	0.222863	-0.407359	-0.511385	-1.21729	-0.689002	-0.753796
Il11	1.82276	0.900437	0.274765	0.512474	-0.367432	-0.242359	-1.54371	-0.80342	-0.553514
Rdh11	2.07925	0.365343	0.477268	0.313712	0.00573097	-0.812822	-1.39181	-0.720653	-0.316018
Ptgs2	1.79943	0.538745	-0.492433	0.872067	0.229578	-0.0824327	-1.41203	-1.15073	-0.302201
Lif	1.522	0.613788	-0.411633	1.25367	0.374833	-0.274702	-1.32175	-1.05209	-0.704121
Slc22a23	1.14461	0.419495	0.712365	0.806017	0.530605	-0.360781	-1.28162	-1.81018	-0.160513
Dhrs9	1.67644	0.0779372	0.72809	0.165763	0.745266	-0.653523	-0.757781	-1.73426	-0.247939
Ghitm	1.72264	0.597644	1.40262	-0.742842	-0.556732	-0.482401	-1.00271	-0.758886	-0.179344
Cars	1.80699	0.530922	1.28156	-0.919366	-0.266519	-0.679013	-0.94352	-0.732678	-0.0783758
Mthfd2	1.85599	0.548664	1.17506	-0.819582	-0.514734	-0.676972	-1.11781	-0.477799	0.0271795
Psph	1.91845	0.324816	1.27928	-0.778	-0.447995	-0.550567	-1.11621	-0.424757	-0.205016
Clint1	1.66463	0.741934	1.15138	-0.939732	-0.193442	-0.458462	-1.42462	-0.422395	-0.119291
Tfam	1.79228	0.6933	1.07296	-1.0891	-0.131782	-0.254564	-1.23307	-0.478801	-0.371225
Ccdc47	1.59131	0.4994	1.5375	-0.464057	-0.629099	-0.303069	-1.28523	-0.633791	-0.31296
Cept1	1.64368	0.736178	1.43148	-0.674637	-0.84771	-0.331905	-0.945115	-0.600921	-0.411051
Hinfp	1.67984	0.529066	1.36078	-0.664182	-0.49521	-0.113308	-0.91317	-1.21913	-0.164685
Tmem41b	1.92458	0.854708	0.86748	-0.454621	-0.664017	-0.279543	-1.21208	-0.719388	-0.317114
Tmem57	1.8611	0.845995	0.996595	-0.468635	-0.539426	-0.404706	-1.19183	-0.803083	-0.296007
Tm9sf2	2.05013	0.704015	0.77142	-0.694806	-0.431039	-0.33518	-1.18847	-0.692151	-0.183911
Rpn1	1.96541	0.727913	0.709398	-0.461966	-0.220432	-0.0634684	-1.44035	-0.716562	-0.49994
Stab1	1.87395	0.773621	0.850349	-0.412759	-0.073705	-0.239659	-1.33638	-0.959961	-0.475451
Mtfr1	2.14134	0.653409	0.690585	-0.456529	-0.238255	-0.487849	-1.1541	-0.663909	-0.484694
Pmvk	2.07046	0.716633	0.752997	-0.34375	-0.372464	-0.560189	-1.16009	-0.783268	-0.320322
Acp6	2.02095	0.691595	0.974116	-0.430328	-0.369312	-0.616027	-0.848351	-0.878414	-0.544228
Fads1	1.71379	0.768352	1.13961	-0.168363	-0.182862	-0.369466	-1.24035	-1.00083	-0.65988
Hspa5	2.383	0.0970574	0.49335	-0.419746	-0.0690847	-0.441759	-1.08774	-0.640487	-0.314598
Serp1	2.31376	0.363246	0.504608	-0.518401	-0.209641	-0.460783	-1.1123	-0.674849	-0.205636
Ifrd1	2.41606	0.178194	0.426869	-0.40317	-0.167841	-0.561882	-0.82778	-0.842299	-0.218147
Mvd	2.21056	0.424475	0.540025	-0.291382	-0.0283512	-0.611142	-1.08707	-0.985512	-0.171605
Hyou1	2.38111	0.141254	0.634633	-0.568384	-0.418295	-0.652121	-0.776631	-0.601216	-0.140349
Alkbh1	2.34365	0.0130564	0.782906	-0.43686	-0.252356	-0.429782	-0.721278	-0.862483	-0.436852
Atf4	2.12997	0.204655	1.08396	-0.42022	-0.503755	-0.551317	-1.04772	-0.529393	-0.366183
Slc39a7	2.13299	0.120658	1.01247	-0.645866	-0.356573	-0.358078	-1.2017	-0.504231	-0.199666
Sec61a1	2.17803	0.471143	0.753619	-0.77434	-0.310383	-0.611725	-1.01709	-0.593746	-0.0955018
Gnpnat1	2.06973	0.422434	0.951698	-0.906649	-0.0954825	-0.475713	-1.07676	-0.544117	-0.34514
Rhoc	2.14349	0.402675	0.573722	-0.536894	0.365846	-0.659103	-1.21762	-0.52385	-0.548264
Xbp1	2.09727	0.443725	0.730836	-0.739889	0.0473337	-0.458609	-1.33229	-0.283092	-0.50528
Fkbp11	2.36716	0.0931571	0.648733	-0.848801	-0.410618	-0.279446	-0.757832	-0.187533	-0.624816
Dus4l	2.2511	0.173664	0.640648	-0.837248	0.166985	-0.624846	-0.657547	-0.155662	-0.957099
Mtx3	2.14748	-0.0377904	0.893772	-0.402235	0.295465	-0.339378	-0.690935	-0.88448	-0.981895
Extl1	2.19345	-0.343463	0.858048	-0.207128	0.00639059	-0.108211	-0.772367	-0.388951	-1.23777
Alg2	2.13553	0.192028	0.605324	-0.742996	0.0408114	0.159926	-1.32849	-0.78402	-0.278123
Tmem74	2.02781	-0.0277589	0.598389	-1.00603	0.579432	0.226673	-1.13943	-0.769163	-0.489921
Rft1	1.92452	0.432447	0.577344	-0.841019	0.0139663	0.530368	-1.35302	-0.386059	-0.898543
Gtpbp2	1.4456	0.0633009	1.83118	-0.56627	-0.446969	-0.168223	-1.23407	-0.298038	-0.62651
Coasy	1.65675	0.194622	1.37101	-0.857484	-0.298556	-0.103458	-1.50959	0.0192456	-0.47254
Sesn2	1.36252	0.0661045	1.2064	-1.16962	0.429026	0.244224	-1.72179	-0.106926	-0.309938
Reep6	1.53677	-0.122534	1.38124	-1.20697	0.660614	0.0201681	-0.911416	-0.8651	-0.49277
Etnk1	0.981326	1.278	1.223	-0.807086	-0.0117171	0.287769	-0.813702	-1.40559	-0.732003
Aldoc	1.04776	1.63815	0.838703	-0.753172	0.174328	-0.0822281	-1.00326	-1.2251	-0.63518
Vegfc	0.75482	1.46689	1.34655	-1.19621	0.198051	-0.19144	-0.607252	-0.987649	-0.783762
Raet1d	0.671166	1.27019	1.40347	-0.735926	0.0611607	0.395132	-1.31957	-0.87955	-0.86608
Bend4	0.749811	1.49865	1.39881	-1.01944	-0.40258	0.102497	-0.938395	-0.396659	-0.992683
Casp4	1.26694	0.94453	1.46869	-0.905372	-0.0146124	-0.21216	-0.410858	-1.18738	-0.949777
Eml5	1.13655	0.766576	1.73765	-0.449099	-0.476524	-0.300957	-0.159988	-1.21521	-1.039
2310042D19Rik	0.871404	1.32634	1.64532	-0.594	-0.577249	-0.286776	-0.527048	-0.962621	-0.89537
Pcdh15	0.989571	0.731049	1.6886	-1.45691	-0.162367	-0.0128653	-0.0579175	-0.908134	-0.811027
Rad54b	0.704471	0.930923	1.7871	-0.435601	-1.1578	0.270517	-0.269688	-1.13049	-0.699438
Slc26a2	0.972385	1.36914	1.17299	-0.615501	-1.16253	0.38121	-0.180431	-1.06696	-0.870305
Tns3	0.87744	1.56391	0.801088	-0.712164	-0.531907	0.604863	-0.171683	-1.23689	-1.19466
4930583H14Rik	1.60374	1.00234	0.919895	-0.549962	-0.902071	0.165688	-0.408912	-0.371979	-1.45874
Cox4i2	1.54885	0.76397	0.840461	-0.913762	-1.02977	0.934983	-0.733199	-0.643955	-0.767584
Usp13	1.597	1.45396	0.310956	-1.2671	-0.360588	0.00473761	-0.099678	-0.546052	-1.09324
Pygl	1.91442	0.818999	0.635853	-1.3105	-0.493729	0.0577478	-0.222371	-0.335964	-1.06446
Pcsk5	1.37482	1.07009	0.939437	-1.62543	-0.469143	-0.224027	0.204667	-0.234516	-1.03589
Zranb2	1.50337	0.868066	1.4084	-0.505955	-0.489363	-0.674929	-0.584878	-0.239238	-1.28547
1600027N09Rik	1.39845	0.80359	1.56972	-0.470464	-0.201982	-0.65037	-0.783193	-0.480259	-1.18549
Dram2	1.32062	0.950547	1.55218	-0.627333	-0.857676	-0.174225	-1.05647	-0.38937	-0.718272
Myoz1	1.64402	0.991402	1.22664	-0.747559	-0.747559	-0.124268	-0.747559	-0.747559	-0.747559
Gpsm3	1.25656	1.23509	1.1885	0.21485	-0.406833	-0.650765	-1.14672	-0.617635	-1.07306
Gm885	0.906783	1.35798	1.39036	0.103269	-0.22273	-0.610932	-1.24058	-0.772031	-0.912119
Cd38	1.32446	1.23583	1.33154	-0.0811928	-0.63278	-0.713564	-0.765568	-0.834265	-0.864453
Aqp8	1.38387	1.25119	1.12076	0.0392862	-0.206777	-0.897082	-0.897082	-0.897082	-0.897082
Fam116b	1.62828	0.116156	1.47685	-0.631879	0.279468	-0.141467	-0.803499	-0.678759	-1.24515
H2-T24	1.68987	0.198986	1.56394	-0.760872	0.0278316	-0.593242	-0.333163	-0.832826	-0.960524
Agpat9	1.88837	0.561238	0.950802	-0.730281	0.144748	-0.0153429	-0.763844	-1.06814	-0.967554
Slc4a10	2.02903	0.303216	1.09813	-0.863005	-0.187977	-0.0566208	-0.793933	-0.802198	-0.726649
Fam38b	1.89364	0.561506	0.951525	-0.331287	-0.171523	0.0113367	-0.859224	-0.709875	-1.34609
Spty2d1	1.64705	0.362809	1.30772	-0.566723	-0.211191	0.323717	-1.35548	-0.735524	-0.772377
Ddx19b	1.21473	0.575574	1.42436	-0.90841	0.206371	0.506395	-0.988947	-0.987385	-1.04268
Hiat1	1.90168	1.05049	0.605618	-0.195952	-0.862838	-0.609556	-1.24531	-0.304501	-0.339631
Arl6ip6	1.97502	0.660093	0.610028	-0.101774	-1.10148	-0.536999	-1.32281	-0.0102137	-0.171856
Hax1	2.13545	0.351034	0.782736	-0.38672	-0.46204	-0.25739	-1.3374	-0.143428	-0.682246
Sar1b	1.7789	0.926905	0.822575	-0.452816	-0.619815	-0.418596	-1.43541	0.082445	-0.684189
Ankrd32	1.81638	0.604337	1.26484	-0.611942	-1.10602	-0.471418	-0.812156	-0.236707	-0.447317
Ggps1	1.77411	0.603964	1.04249	-0.284327	-1.46499	-0.336149	-1.00171	-0.197917	-0.135477
Srp19	1.92841	0.307237	1.17229	0.00403625	-1.23299	-0.287639	-0.735107	-0.597797	-0.558438
Kif3b	1.35336	1.0909	1.16907	0.276149	-0.935375	-0.289008	-0.598522	-0.829148	-1.23742
2610039C10Rik	1.82704	0.849459	0.798215	0.221998	-1.09248	-0.415835	-0.581397	-0.444182	-1.16282
Haus3	1.35347	1.02569	1.15089	0.526811	-1.18738	-0.779373	-0.731979	-0.540006	-0.818124
A830007P12Rik	1.55741	1.41755	0.766099	-0.204186	-1.2417	-0.426244	-0.445052	-0.688081	-0.735791
Naa38	1.77712	0.927563	0.554944	0.658987	-0.728185	-0.943911	-1.00194	-0.48149	-0.763087
Bst1	1.63467	1.11148	0.857666	0.360875	-0.849075	-0.709727	-0.955588	-0.588838	-0.861463
Slc31a1	2.08957	0.530926	0.579147	0.353729	-0.521346	-0.385051	-0.917549	-0.60603	-1.1234
2017-03-07	1.66226	1.00577	0.853815	-0.0706537	-0.717131	0.0102758	-1.19499	-1.19222	-0.357133
Ptprn	1.50683	1.13992	0.781958	0.16382	-0.455782	-0.193718	-1.45565	-1.14457	-0.342802
Wdr37	1.25805	1.32496	0.883213	0.35555	-0.962367	0.019398	-1.13053	-0.980114	-0.768154
Tmed7	1.25595	1.5277	0.637661	-0.24122	-0.493393	0.111312	-1.6334	-0.687055	-0.47756
Golph3	1.52345	1.25616	0.238613	0.146213	-0.611163	0.401839	-1.58433	-0.823685	-0.547096
Dnajc10	1.18892	1.29266	0.716695	0.0575136	-0.642002	-0.454064	-1.74874	-0.770146	0.359162
9430023L20Rik	1.52175	1.13376	0.688802	-0.0382211	-0.484294	-0.534604	-1.51232	-1.02591	0.251041
Lig4	1.24211	1.37024	0.4929	0.194883	-0.715774	-0.0230916	-1.32853	-1.4104	0.177666
Pqlc1	1.84223	0.91465	0.629009	-0.419158	-1.00263	-0.0505425	-1.03253	-1.04723	0.166198
Slc17a6	1.20736	1.12021	0.870258	-0.463045	-0.997806	0.33954	-1.56836	-0.808991	0.300827
Rnf40	1.3539	0.4934	1.14006	0.149275	-0.148585	0.384222	-1.68087	-1.14235	-0.549052
Slc37a4	1.42662	0.485207	1.4954	-0.0180433	-0.760477	-0.00288499	-1.51455	-0.595158	-0.516112
C630004H02Rik	0.873968	0.569273	1.32222	0.100033	-0.482412	0.46172	-2.07784	-0.163964	-0.602998
Pip5k1a	1.08512	1.29483	1.23912	-0.695227	0.00872829	-0.454998	-1.51111	-0.774424	-0.192047
Tinf2	1.2524	1.31629	1.00296	-0.790384	0.210063	-0.378374	-1.50347	-0.6048	-0.504698
Lpcat3	0.993326	1.40174	0.997115	-0.795374	0.230139	0.0433988	-1.52318	-0.937416	-0.409744
Raet1c	1.02793	1.26219	1.22555	-0.914511	0.159643	0.0213258	-1.447	-0.646468	-0.688663
Cdc27	0.544784	1.57255	0.958259	-1.07877	0.4312	-0.11629	-1.6125	-0.577878	-0.121356
Serping1	0.417819	1.68788	1.20986	-0.845458	0.480793	-0.504163	-1.2231	-0.796185	-0.427441
Zfp618	0.681008	1.66078	0.591872	-0.370957	0.630766	-0.135276	-1.70517	-0.836213	-0.516806
Maml1	0.938121	1.48042	0.7655	-0.732096	0.421973	-0.057246	-0.916816	-1.64983	-0.250019
Dgke	1.08213	1.29847	0.845539	-1.02251	0.276467	0.0411816	-1.15542	-1.40286	0.0369987
Itga7	0.828067	1.71782	0.681615	-0.781791	-0.0606173	0.0893783	-0.97321	-1.52584	0.0245826
Acsl6	0.908742	1.65026	0.927214	-0.94782	-0.198754	0.0879911	-1.18812	-1.10229	-0.137219
Fasn	0.911413	1.17239	1.36155	-0.978454	0.129344	-0.440632	-1.12448	-1.21439	0.183264
Slc4a7	0.463937	1.60005	0.862483	-0.867611	0.38593	-0.269446	-1.40126	-1.17549	0.401404
Dhcr24	1.43299	1.26739	0.821699	-0.534073	0.0856562	-0.541121	-1.19434	-1.28467	-0.053525
Znrf2	1.4092	1.27475	0.566465	-0.320124	0.286633	-0.676011	-1.24085	-1.37179	0.0717236
Dhcr7	1.83683	0.399173	0.720289	-0.486416	0.515751	-0.379436	-1.41414	-1.13965	-0.0523927
Fads2	1.39007	0.702962	0.740643	-0.40909	0.57418	0.0848977	-1.85383	-1.01978	-0.210059
Guca1a	1.2758	1.058	0.462842	-0.564279	0.457396	0.273193	-1.86152	-0.977708	-0.12372
Pank3	0.994626	1.19813	0.626943	-0.226992	0.578505	0.11683	-1.76783	-1.26089	-0.259325
Yaf2	1.21373	1.02042	0.679629	-0.314862	0.196718	0.48551	-1.92512	-0.566979	-0.789041
Map2k6	1.02543	1.14407	0.00274135	-0.397817	0.457138	0.713194	-2.09289	-0.527704	-0.324162
Spata24	0.800005	1.25131	0.549268	-1.03542	0.774974	0.549012	-1.63347	-0.452015	-0.803658
Retsat	1.05871	0.215749	0.649749	-0.657614	0.910996	0.987317	-1.7671	-0.89086	-0.506947
Procr	1.1463	0.707563	0.375111	-0.68515	0.984728	0.736449	-1.67004	-0.830513	-0.764451
Tspan11	0.762045	1.56568	0.886743	-0.439655	0.338245	0.135004	-1.29944	-1.34075	-0.607874
Mmp12	0.745516	1.4554	1.12319	-0.106921	0.218716	-0.00412422	-1.25663	-1.2614	-0.913752
1810012P15Rik	0.93117	1.54193	0.702976	-0.389844	0.163732	0.456921	-1.16736	-1.15969	-1.07983
Nbea	0.556612	1.58476	0.697068	0.152726	-0.110891	0.578756	-1.16274	-1.55669	-0.739602
Ankrd40	0.421043	1.73084	0.534228	-0.318381	0.322034	0.608919	-1.26134	-0.631841	-1.4055
Glis2	0.59663	1.7279	0.749	-0.135452	0.345024	-0.026082	-0.555601	-1.32068	-1.38073
Zmym2	1.47998	1.72187	0.0933706	-0.701858	0.0949196	-0.103041	-0.613937	-1.03016	-0.941135
Hoxb13	1.15637	1.75328	-0.142245	-0.612995	0.782156	-0.206495	-0.761439	-1.08644	-0.882195
Gm9766	0.639903	1.95575	0.508229	-0.997741	0.593203	-0.182384	-0.745623	-0.915952	-0.855388
Srebf1	0.28858	0.961205	1.57999	-0.375694	0.223902	0.300097	-1.89612	-0.672354	-0.409611
Pcyt2	0.982162	0.494615	1.35804	-0.398982	0.764679	0.129398	-1.68107	-0.809572	-0.83927
Gabbr1	0.660926	1.08496	1.73786	-0.534862	0.349107	-0.725331	-0.885214	-1.17874	-0.508704
Galnt6	0.882217	1.18526	1.4703	-0.206294	0.24546	-0.491354	-1.21143	-0.728444	-1.14571
1110031I02Rik	0.916737	0.817867	1.33412	-0.37951	0.454079	0.0898926	-1.35105	-0.326267	-1.55587
Sigirr	0.832814	1.07106	1.19957	-0.636171	0.44908	0.184648	-0.919883	-0.43674	-1.74438
Atp1a3	0.642858	1.14628	0.817658	-0.0377301	0.832782	0.117703	-1.53056	-0.458428	-1.53056
Lonp1	0.997959	0.378781	1.84023	-1.12579	-0.343855	0.0575386	-1.38816	-0.397282	-0.0194188
Tmc6	0.772951	0.625879	1.70897	-0.811951	-0.265932	0.291601	-1.6127	-0.814409	0.105596
Serpini1	0.574828	0.846062	1.42571	-1.0428	-0.101744	0.874144	-1.57787	-0.687862	-0.310469
Rbpms2	0.778485	0.783774	1.51849	-1.09166	-0.108928	0.7758	-1.29026	-0.871313	-0.494394
Eif4enif1	0.795216	1.22563	1.41805	-0.91739	-0.0794906	0.257692	-1.41727	-0.874968	-0.407465
Itgb7	0.97085	0.98213	1.60254	-0.995991	-0.271874	0.0885931	-1.20469	-0.981644	-0.18991
Plekhn1	1.11577	1.02099	1.56969	-1.13629	-0.300106	0.0745075	-0.899703	-0.78825	-0.656606
Ern1	0.312874	1.03537	1.71419	-1.55919	-0.188664	0.351646	-0.798025	-0.813336	-0.0548656
Hmga1-rs1	0.870726	0.643858	1.38113	-1.21882	0.0399211	0.539298	-0.909125	-1.51257	0.165589
Crebzf	0.716113	0.703023	1.24534	0.143968	0.391015	0.44831	-1.20867	-1.78169	-0.657408
Rhbdd2	0.576352	0.812004	1.27056	-0.111383	0.557519	0.543958	-0.876379	-1.67202	-1.10061
Zbtb48	0.59711	0.422718	1.79698	-0.218271	0.510554	0.0341256	-0.504923	-1.62811	-1.01018
Stk10	-0.0492494	0.462414	1.91433	-0.165741	0.0678444	0.899412	-1.01112	-1.13946	-0.97843
Ehbp1l1	0.514571	0.550134	1.56506	0.547829	-0.623568	0.518739	-1.15317	-1.61282	-0.306775
Tlcd2	0.918847	0.40266	1.72484	0.373119	-0.449796	0.0689084	-0.548005	-1.61301	-0.877563
Hells	1.79965	0.541702	0.982081	0.104033	-1.31334	-1.03157	0.0758637	-0.694927	-0.463493
Ppig	1.93884	0.439416	0.853638	0.0128664	-1.23827	-0.984229	0.205553	-0.716145	-0.511672
D14Abb1e	1.69336	0.506788	0.878799	0.237176	-1.47975	-0.996051	0.360321	-0.514368	-0.686273
Whsc1	1.86069	0.502614	0.642184	0.293239	-1.24373	-1.08644	0.38223	-0.699588	-0.651199
Sema4c	1.82034	0.492837	0.580934	0.388544	-1.34635	-0.944436	0.389485	-0.959605	-0.421742
Rest	1.82217	0.426869	0.832433	-0.115501	-1.33295	-0.751889	0.584188	-0.863533	-0.601788
Tnfrsf23	1.77158	0.517946	0.553814	-0.256585	-1.65217	-0.654293	0.585743	-0.848239	-0.0177898
Xylt1	1.70608	0.605735	0.770129	-0.262008	-1.56702	-0.560911	0.508102	-0.995123	-0.204976
Bdkrb2	1.77367	0.562926	0.500015	-0.000798789	-1.67642	-0.965642	0.327351	-0.648775	0.127675
Tnfrsf22	1.59127	0.471016	0.663003	-0.115909	-1.77779	-0.800827	0.723071	-0.680392	-0.0734441
Apex2	1.7159	0.373433	0.6625	0.102771	-1.46872	-1.32199	0.589353	-0.301689	-0.35156
Cpne7	1.72666	0.373362	0.766373	0.10685	-1.5597	-1.16967	0.472401	-0.362454	-0.353817
Hnrnph2	1.62968	0.567454	0.61169	0.399181	-1.49406	-1.32721	0.412949	-0.448111	-0.351564
Ncapg2	1.39755	0.615437	0.92162	0.455012	-1.69636	-1.17168	0.219105	-0.509794	-0.230892
Atf1	1.34252	0.714777	0.930134	0.275659	-1.42898	-1.51777	0.351001	-0.498131	-0.169198
Rbm25	1.63746	0.0782502	1.16892	-0.0414723	-1.2586	-1.33337	0.389183	-0.656385	0.0160136
Slamf8	1.48156	0.432181	1.02485	-0.122024	-1.04317	-1.44818	0.716983	-0.91505	-0.127147
Evi5	1.93462	0.797515	0.597866	-0.0642854	-1.01153	-1.15688	0.17281	-0.810592	-0.459515
Ptpn12	1.9959	0.539023	0.672748	-0.0586697	-0.990469	-1.20109	0.222216	-0.814567	-0.365091
Smc5	1.86055	0.684128	0.762818	-0.0362526	-1.15948	-0.883382	0.305028	-0.983109	-0.550297
Trpm6	1.91473	0.669584	0.710636	-0.171469	-0.985567	-0.996664	0.37851	-0.96998	-0.549777
Pds5a	2.14935	0.30611	0.625131	-0.0515834	-1.01989	-0.886601	0.277859	-0.767974	-0.632398
Anp32b	2.09836	0.271471	0.680783	-0.00162914	-1.00334	-1.08717	0.233914	-0.825842	-0.36655
Slc41a1	1.97036	0.660909	0.527064	0.201963	-1.0447	-0.779878	0.220917	-1.06672	-0.689915
Cntnap1	1.99268	0.372722	0.723206	0.387463	-0.978043	-0.7801	0.0557798	-1.08169	-0.692015
Naa50	1.99801	0.425904	0.541786	0.129896	-1.02337	-1.31254	0.260977	-0.790619	-0.230042
Sltm	1.96101	0.311968	0.797339	0.121686	-1.0351	-1.27002	0.159641	-0.796275	-0.250251
Exoc6	1.88415	0.33881	0.727807	0.164033	-0.826656	-1.27321	0.258685	-1.18279	-0.0908393
Bhlhe40	1.63301	0.878197	0.746763	-0.104553	-1.43773	-1.05829	0.433727	-0.438274	-0.652852
Pkig	1.55388	0.824471	0.837264	-0.163934	-1.49801	-1.06313	0.520696	-0.402891	-0.60836
Zbtb38	1.60211	0.756587	0.629624	-0.0583455	-1.38683	-1.17727	0.734518	-0.608355	-0.49204
Fnip2	1.68519	0.760708	0.855365	-0.156854	-1.26756	-0.990108	0.502612	-0.593611	-0.795734
Rab20	1.83766	0.651573	0.756402	-0.186358	-1.21524	-0.998779	0.48313	-0.636646	-0.691742
Jak3	1.6673	0.765374	0.810554	-0.372051	-1.13804	-1.29162	0.58747	-0.536138	-0.49285
Gm9992	1.53025	0.922718	0.695612	-0.360994	-1.2437	-1.22572	0.745036	-0.639482	-0.423717
Asxl2	1.47025	0.55247	0.831275	0.129573	-1.13045	-1.47136	0.778589	-0.807223	-0.353121
Rbbp6	1.28334	0.615421	0.743507	0.161968	-1.24685	-1.31833	1.05343	-0.927009	-0.365483
Rlim	1.44569	0.867148	0.682568	-0.0803409	-1.34219	-1.49039	0.508171	-0.634667	0.0440076
Sox7	1.61454	0.859017	0.512021	-0.0903231	-1.19298	-1.2798	0.621644	-0.965014	-0.0791025
Sbno1	1.56827	0.744143	0.996658	-0.0464996	-1.07001	-0.846123	0.408063	-1.33813	-0.416374
Gabpb2	1.59161	0.576764	0.977471	-0.054257	-1.34463	-0.948736	0.549817	-1.03227	-0.315778
Plagl2	1.39475	0.680768	1.02455	-0.507529	-1.06616	-0.915075	0.943371	-1.10246	-0.452212
Mt1	1.96515	0.752812	0.397528	-0.0486148	-1.13405	-1.07592	0.371229	-0.419836	-0.808304
Repin1	2.13188	0.573476	0.382806	-0.129693	-1.06749	-0.878675	0.347896	-0.629405	-0.730793
R3hdm1	1.63569	0.795894	0.753835	-0.0126833	-1.06451	-0.989545	0.657313	-0.911884	-0.864101
Trpm3	1.70233	0.884221	0.42889	0.0344898	-1.18887	-0.872629	0.710032	-0.931831	-0.766639
Vill	1.75601	0.711287	0.283146	0.00460752	-1.5537	-0.590831	0.745563	-0.463661	-0.892413
Klf9	1.6965	0.151459	0.523321	-0.0663586	-1.21069	-1.21471	1.158	-0.528054	-0.50947
Fxyd5	1.84512	0.403948	0.404671	-0.210169	-0.975037	-1.41001	0.901105	-0.398726	-0.560904
Mfsd7b	1.98527	0.144639	0.718012	-0.364921	-1.05459	-1.26937	0.589674	-0.511547	-0.237168
Cdk20	1.86544	0.413929	0.615152	-0.258781	-1.255	-1.18928	0.711479	-0.459667	-0.443271
Ube2q2	1.91789	3.44965e-05	0.526047	-0.00739067	-1.26114	-1.39261	0.644488	-0.278515	-0.14881
Hsd17b1	1.81227	-0.197992	0.779625	-0.0694326	-1.05265	-1.56203	0.650993	-0.064226	-0.296563
Myd88	1.82308	0.116748	0.813639	0.0692886	-1.06741	-1.03521	0.731268	-0.411954	-1.03945
Rasa2	1.58594	0.167325	0.929234	0.0110375	-1.52355	-0.905877	0.848498	-0.31916	-0.793447
Itpr2	1.6433	-0.166621	1.10212	-0.251941	-1.23651	-0.973253	0.948165	-0.692414	-0.372848
Ccdc19	2.14473	-0.416664	0.505987	-0.0881379	-1.06053	-0.845945	0.735396	-0.718122	-0.25671
Avil	2.09114	-0.370285	1.04511	-0.212839	-1.06871	-0.718876	0.310775	-0.443998	-0.632316
BC007180	2.00814	-0.0867311	1.04909	-0.383316	-0.627013	-1.31068	0.30813	-0.324125	-0.633487
Spred1	1.53648	0.288183	0.954402	-0.203442	-1.96464	-0.454139	0.536754	-0.278975	-0.414622
Dtl	1.21627	0.548429	1.31302	-0.170948	-1.73546	-0.798282	0.583593	-0.379699	-0.576926
Lin54	1.24891	0.265697	1.25396	-0.0213664	-1.85184	-0.930455	0.588123	-0.238364	-0.314659
Chek1	1.29155	0.128986	1.31569	0.203047	-1.90434	-0.87578	0.253209	-0.219772	-0.192592
P2rx7	1.60789	-0.145011	0.737853	0.238044	-1.43586	-1.34509	0.879836	-0.23038	-0.307279
Lonrf3	1.58444	0.11719	0.606486	0.33777	-1.54759	-1.15752	0.930008	-0.348951	-0.521832
Slc6a8	1.45959	-0.255359	0.894961	-0.058822	-1.50304	-1.15053	1.11994	-0.12209	-0.384656
Pla2g2e	1.5955	-0.316426	1.00779	0.267701	-1.67491	-1.05326	0.426556	0.136527	-0.389474
Qk	1.50557	0.766491	0.835054	-0.325203	-1.32659	-1.50069	0.404002	-0.406508	0.0478721
Atp10a	1.63307	0.821118	0.780712	-0.408466	-1.09243	-1.51809	0.303506	-0.540303	0.0208848
Sptlc2	1.54061	0.948049	0.943037	-0.657876	-1.23241	-1.24171	0.257623	-0.526919	-0.0304014
Steap1	1.5797	0.932101	0.744288	-0.804214	-1.23637	-1.29939	0.323326	-0.325579	0.0861412
Soat1	1.75203	0.882034	0.829716	-0.808349	-1.03907	-1.21862	0.114318	-0.481516	-0.0305481
Lrp8	1.85042	0.650087	0.879856	-0.633685	-1.01635	-1.26647	0.0873653	-0.576578	0.025357
Spint1	1.89035	0.64933	0.804995	-0.540331	-1.31779	-1.0962	0.0179035	-0.350921	-0.0573377
Tnfaip2	1.79832	0.440071	0.913528	-0.536216	-1.07239	-1.44396	0.342148	-0.201137	-0.240358
Gla	1.63726	0.623375	0.884516	-0.298103	-1.30351	-1.41745	0.41552	-0.1445	-0.397113
Dcbld1	1.73221	0.78984	0.71706	-0.380116	-1.08872	-1.55738	0.168869	-0.141873	-0.23989
Npc2	1.4919	0.56758	1.1065	-0.707985	-1.38788	-1.25795	0.221624	0.273058	-0.306854
Cast	1.53719	0.673754	1.15757	-0.740419	-1.26416	-1.26024	0.193373	-0.0321538	-0.264915
Ripk1	1.53293	0.541305	1.05586	-0.824976	-1.52934	-1.05777	0.319267	-0.0442053	0.00693246
Atf3	1.69885	0.605433	1.08883	-1.00619	-1.17286	-0.995357	0.260613	-0.228151	-0.251163
Kcnma1	1.56973	0.561322	1.09478	-0.967296	-1.05306	-1.25876	0.521522	-0.15784	-0.310396
B3galnt2	1.91321	0.163715	1.06191	-0.740555	-0.980936	-1.21584	0.242248	-0.0820242	-0.361728
Topbp1	1.48731	0.870514	1.14685	-0.507024	-1.35237	-1.18158	-0.0113403	-0.481419	0.0290709
Nr5a2	1.35213	1.11307	1.18939	-0.409376	-1.2449	-1.2449	-0.348868	-0.356048	-0.0505073
Slfn2	1.31846	0.940821	1.19254	-0.641075	-1.26063	-1.37317	0.137958	-0.155232	-0.159677
Wisp1	1.14264	0.987236	1.27271	-0.131023	-1.3683	-1.45741	-0.105531	-0.263543	-0.0767776
Hnrnpm	1.56937	0.69986	1.13353	-0.165607	-1.16127	-1.42124	-0.420269	-0.402119	0.167745
Bdp1	1.38435	0.808974	1.38643	0.046476	-1.34036	-0.978612	-0.15094	-0.750264	-0.406055
E2f2	1.53529	0.532717	1.27189	0.121142	-1.55077	-0.867819	-0.0164375	-0.658071	-0.367945
Kntc1	1.40789	0.734854	1.49616	-0.438443	-1.35452	-0.718617	0.0503369	-0.585941	-0.591718
Piwil4	1.10751	0.868492	1.54053	-0.256708	-1.5705	-0.838552	0.0509843	-0.475328	-0.426421
Ctsl	1.5321	0.605631	1.10414	-0.360758	-1.43568	-1.15604	0.487021	-0.402398	-0.374017
B4galt5	1.32102	0.765174	1.22113	-0.444703	-1.45584	-1.22206	0.41723	-0.379485	-0.222473
Tapbp	1.29761	0.588498	1.23291	-0.58297	-1.57125	-1.1333	0.536964	-0.167477	-0.200995
Tor3a	1.34084	0.460554	1.46743	-0.573091	-1.3696	-1.14326	0.392886	-0.236453	-0.339305
Trim56	1.38754	0.567372	1.33737	-0.409829	-1.25643	-1.07574	0.608492	-0.676484	-0.482286
Zfp655	1.51651	0.601176	1.18669	-0.404295	-1.2497	-1.14003	0.567452	-0.576505	-0.501302
Cln8	1.50936	0.151799	1.26977	-0.419114	-1.26184	-1.21571	0.737003	-0.388835	-0.382433
Pak3	0.988934	0.96508	1.37467	-0.561802	-1.42388	-1.21334	0.402281	-0.468902	-0.0630414
Nmi	1.15943	0.739119	1.45593	-0.811844	-1.32541	-1.09392	0.364383	-0.49437	0.0066913
Iqgap1	1.0747	0.723259	1.28611	-0.656521	-1.70184	-0.85326	0.64864	-0.427893	-0.0931935
Abhd2	1.05804	0.693166	1.32493	-1.0071	-1.38739	-0.694047	0.8678	-0.656734	-0.198662
Aff1	0.949681	0.562768	1.23363	-0.860809	-1.22704	-0.880783	1.13327	-0.974081	0.0633629
Tep1	1.13737	0.406519	1.31573	-0.576501	-1.40644	-1.05057	0.895813	-0.768872	0.0469601
Cyp26c1	1.36336	0.606116	1.10923	-0.619724	-1.54093	-0.793784	0.65472	-0.849272	0.070289
Tor1aip1	1.11753	0.48089	1.53793	-0.399486	-1.36797	-1.01836	0.707212	-0.645247	-0.412494
Crtc2	1.18942	0.41018	1.57062	-0.460226	-1.22164	-0.799454	0.750155	-0.785419	-0.653638
Dync1h1	1.07851	0.0785341	1.72136	-0.430282	-0.761492	-1.06052	0.878667	-0.944244	-0.560529
Dhrs7	1.82382	-0.294584	0.921163	-0.344995	-1.33242	-1.28878	0.288983	0.305523	-0.0787023
Hfe	1.69485	-0.340016	1.10391	-0.279875	-1.5927	-0.934245	0.307915	0.343976	-0.303805
D230037D09Rik	2.00867	-0.357932	0.769695	-0.192856	-1.3111	-1.03789	0.461604	0.0948223	-0.435008
Mfsd10	1.97585	-0.111841	0.785688	-0.419614	-1.38183	-1.02601	0.492076	-0.0221455	-0.292165
Hhipl1	1.8581	-0.023575	0.970318	-0.558457	-1.25193	-1.133	0.571227	-0.110075	-0.322613
Stk32a	1.67864	0.0433805	1.02201	-0.531514	-1.47922	-1.07318	0.601629	0.111275	-0.373006
Rragd	1.31364	-0.731028	1.2367	-0.674029	-1.49645	-0.561397	0.766326	0.622546	-0.4763
Lrrc8e	2.11513	0.0265722	0.454138	-1.03509	-1.1854	-0.534288	0.522339	0.14871	-0.512115
Plxna4	1.99441	-0.0584455	0.290403	-0.244313	-1.79778	-0.275222	0.608471	-0.0813211	-0.436196
Ttc17	1.8413	0.133267	1.3617	-0.265407	-1.17119	-0.578045	0.0374879	-0.544715	-0.814396
Tspan12	1.74752	0.254915	1.27104	-0.294901	-1.43873	-0.442452	-0.011428	-0.140997	-0.944966
Jtb	1.5724	0.178347	1.53869	-0.137933	-1.47253	-0.416962	-0.520657	-0.0382106	-0.703145
Lemd2	1.89943	-0.0581548	1.18277	-0.153681	-1.45487	-0.762929	0.0383987	-0.228621	-0.462342
Tmco4	1.74913	0.175748	1.14124	-0.289502	-1.5609	-0.863968	0.298134	-0.1826	-0.467283
Soat2	1.73928	0.266522	1.35664	-0.51646	-1.31112	-0.95908	-0.0698637	-0.364655	-0.141268
Slc1a7	1.67697	0.564694	1.00175	-0.336812	-1.60689	-0.828533	0.110261	0.0979893	-0.679434
H2-K1	1.23319	0.524718	1.06387	-0.683251	-1.20146	-1.61848	0.729613	-0.0903825	0.0421812
H2-Q4	1.17481	0.443866	1.16423	-0.715331	-1.27667	-1.52547	0.771466	-0.0564588	0.0195625
H2-D1	1.19821	0.521671	0.952698	-0.504631	-1.28861	-1.64859	0.826368	-0.211574	0.154449
B2m	1.14331	0.412321	0.913055	-0.52955	-1.44335	-1.55144	0.944813	0.154682	-0.0438366
Arid5a	1.25708	0.718665	0.932708	-0.493721	-1.54524	-1.43872	0.541529	-0.124411	0.152114
AI607873	1.16049	0.627837	1.07978	-0.504632	-1.62715	-1.35172	0.600594	-0.0307751	0.0455757
Fbxo6	1.14497	0.577287	0.991576	-0.374253	-1.77345	-1.31298	0.543742	-0.0520236	0.255126
Papd7	0.992682	0.52125	1.30545	-0.495029	-1.7036	-1.26164	0.542441	0.0658337	0.0326157
Osmr	0.918696	1.15236	0.900733	-0.655681	-1.60047	-1.31017	0.498058	-0.119183	0.215656
Pde1a	0.960009	1.06216	0.773157	-0.446629	-1.61481	-1.48631	0.440716	-0.0602565	0.371959
2700094K13Rik	0.934036	1.09484	0.861138	-0.31316	-1.28855	-1.69472	0.711989	-0.112593	-0.19298
Ebp	1.01656	0.595941	0.455202	0.185427	-1.78636	-1.54578	0.873767	0.151754	0.0534849
Layn	0.918406	0.363722	0.791456	-0.00491243	-2.07428	-1.10776	0.919798	0.0562621	0.137309
Cdca5	1.20781	0.530312	0.730914	0.259204	-1.80339	-1.33044	0.583532	0.285139	-0.463075
A330021E22Rik	1.09827	0.724251	0.700429	-0.0714376	-1.88016	-1.10354	0.895829	-0.45763	0.0939904
Muc1	1.07472	0.651503	0.596652	-0.147489	-1.75552	-1.37498	0.998688	-0.211547	0.167976
Rbms1	1.01237	0.557228	0.993564	0.102867	-1.69	-1.28556	0.939736	-0.510569	-0.119639
Sirpa	1.1073	0.126377	1.01325	-0.679043	-1.74547	-1.0779	0.692077	0.742093	-0.178683
Tap2	1.12266	0.0514857	1.34393	-0.495577	-1.54508	-1.30987	0.581117	0.451936	-0.200606
Gsdmd	0.733442	0.538277	1.33705	-0.481289	-1.6348	-1.43081	0.302482	0.58208	0.0535669
Zfp946	0.610691	0.296848	1.4307	-0.19699	-1.77459	-1.18647	0.649431	0.564803	-0.394421
Prkd3	0.708269	0.386904	1.56591	-0.534685	-2.01364	-0.564762	0.483056	-0.0553342	0.0242908
Tyro3	0.912019	0.48301	1.57352	-0.468333	-1.8886	-0.602942	0.329346	0.0990276	-0.437043
Oip5	0.651887	0.732484	1.70464	-0.519611	-1.6685	-0.954689	0.0444521	0.292235	-0.282893
Plod3	0.98389	0.751565	0.948238	-0.899758	-1.81957	-0.952676	0.612444	-0.0291352	0.405002
Trim46	0.938002	0.426032	1.15278	-0.945456	-1.68145	-1.02737	0.859534	-0.027848	0.305782
Sepw1	0.851908	0.620786	0.942433	-0.604957	-1.81829	-1.21315	0.892839	0.110893	0.217547
Lhx6	1.19111	0.389779	0.697883	-0.527613	-2.24209	-0.465197	0.596332	0.190406	0.169386
Pi16	1.29848	0.53663	0.685032	-0.484376	-2.05205	-0.675912	0.760903	-0.225388	0.156674
Jak1	0.418382	0.442177	0.528227	-0.817754	-1.56307	-1.36898	1.36679	0.529172	0.465049
Nsg1	0.671134	0.391533	0.416518	-0.500676	-1.91711	-1.13014	1.29603	0.530108	0.242612
Wisp2	0.52273	0.319927	0.396551	-0.106728	-1.55768	-1.57261	1.55939	0.338516	0.099901
Cav3	0.734464	0.563638	0.706932	-0.561935	-1.54542	-1.45669	1.33897	0.10511	0.11493
Phlda1	0.820132	0.474559	0.327956	-0.436108	-1.54108	-1.54997	1.12161	-0.0894973	0.8724
Cacnb2	0.560818	0.183773	0.461638	-0.188143	-1.7826	-1.36294	1.30726	0.00842668	0.811766
Ptpn9	1.15283	0.653259	0.353807	-0.481604	-1.58048	-1.58159	0.81282	0.303663	0.367285
Ahr	1.20303	0.352828	0.465355	-0.53796	-1.73378	-1.30197	1.0452	0.258206	0.249099
Ppp2r1b	0.859174	1.07052	0.177701	-0.573218	-1.82375	-1.24013	0.782706	0.378974	0.368019
Xdh	0.22973	0.354017	1.07138	-0.815499	-1.61489	-1.28183	1.16022	0.378631	0.518245
Sdc3	0.59923	0.458927	0.756973	-1.42073	-1.3536	-1.16714	0.936207	0.767787	0.422352
Lrrc4c	0.575671	1.12244	0.715775	-0.851772	-1.94402	-0.900986	0.287606	0.528453	0.46683
Drd1a	0.19887	1.33525	0.421081	-0.752085	-1.77412	-1.13732	0.661846	0.586549	0.459935
Cxcr7	1.55856	0.828787	0.389007	-0.0852903	-1.49402	-1.39458	0.65104	-0.331035	-0.122472
Hpse	1.50297	0.77066	0.514544	-0.114445	-1.4786	-1.47986	0.598898	-0.363258	0.0490913
Dab2	1.54581	0.586893	0.577971	-0.24303	-1.52046	-1.34468	0.802091	-0.32006	-0.0845276
Csgalnact1	1.56178	0.630498	0.254181	-0.0225242	-1.80557	-1.20367	0.601872	-0.124291	0.107716
Ptgfr	1.16335	1.13068	0.308847	-0.0317742	-1.75597	-1.1441	0.62521	-0.619613	0.323367
Ptpn5	1.27751	0.919214	0.614184	0.0387424	-1.79361	-1.22402	0.526265	-0.388783	0.0304992
Ddx46	1.1992	0.687505	0.541155	-0.21167	-1.08354	-1.83179	0.72776	-0.602554	0.573937
Utp14b	0.932717	0.725167	0.439299	0.0641126	-1.48543	-1.66096	0.87001	-0.524793	0.639881
Myo5a	1.009	0.776336	0.43378	-0.0241981	-1.48723	-1.586	1.14014	-0.384917	0.123098
Susd1	1.16949	0.892805	0.417866	0.0182214	-1.19998	-1.73997	0.913286	-0.58759	0.115877
Thbd	0.805723	1.13903	0.695014	-0.0194769	-1.78435	-1.44186	0.265586	-0.128722	0.469059
Serpinb1b	1.11921	1.10819	0.345509	0.0937763	-1.64925	-1.51633	-0.0035796	-0.0991638	0.601636
Gen1	1.04669	1.40118	0.437144	-0.0905337	-1.39243	-1.53277	0.100003	-0.455334	0.486053
Slc25a32	0.775659	1.12587	0.554011	-0.400662	-1.47218	-1.6244	0.112647	0.0100687	0.91899
Serpina3f	0.493338	0.977173	1.15435	-0.110912	-1.64048	-1.54049	0.106475	-0.0545473	0.615088
Top2a	0.939645	1.61703	0.415943	0.139159	-1.24585	-1.65283	2.01012e-05	-0.146754	-0.066369
Naa35	1.26905	1.63478	0.343339	-0.160506	-1.41396	-1.12108	0.109494	-0.538804	-0.122303
Ercc6l	1.56313	0.855072	0.904861	-0.500384	-1.35239	-1.33788	-0.335082	0.149418	0.0532574
Pla2g2d	1.19684	1.31029	0.68883	-0.56421	-1.31913	-1.49529	-0.141538	0.0938499	0.23036
Spink6	1.30526	1.33487	0.397955	-0.464165	-1.38024	-1.38024	0.0567828	0.464154	-0.334362
Dnajc13	0.591032	0.991713	1.02941	0.0382797	-1.43732	-1.48999	0.912917	-0.695098	0.0590596
Atm	0.682396	0.868482	1.2844	-0.0111438	-1.60773	-1.35408	0.635644	-0.552236	0.0542684
Usp25	0.720368	1.13478	1.33171	-0.368351	-1.10808	-1.30648	0.658801	-0.95016	-0.112595
Xrn1	0.874894	1.14928	1.0414	-0.0914488	-1.13678	-1.23419	0.84309	-1.07579	-0.370454
Atp7a	0.368292	1.14966	1.14361	0.139254	-1.60228	-1.10504	0.939349	-0.441493	-0.591346
Bard1	1.03586	0.836576	1.08647	0.0119923	-1.48241	-1.02999	0.868907	-0.38786	-0.939549
Lifr	-0.0737879	0.760014	1.14877	-0.145929	-1.28982	-1.55859	1.3817	-0.268167	0.0458071
Rab27b	-0.147627	1.0837	1.33996	0.170743	-1.44262	-1.53755	0.649468	-0.287572	0.171493
Pim1	1.19663	1.26327	0.74173	-0.880783	-1.21465	-1.36699	0.260716	-0.342191	0.342264
Suv39h2	1.11657	1.35878	0.719911	-0.918337	-1.16553	-1.43465	0.245103	-0.141986	0.220138
Il4ra	1.23863	1.37262	0.554237	-0.941184	-1.16815	-1.34395	0.393607	-0.222313	0.116504
Flot1	1.12477	1.22178	0.780115	-0.853767	-1.26122	-1.44996	0.449675	-0.0739153	0.0625301
Lrg1	1.14947	1.26598	0.901894	-1.01711	-0.984729	-1.44797	0.3254	-0.232958	0.0400271
Socs3	1.134	1.41036	0.577224	-1.30516	-1.07895	-1.18645	0.279498	-0.0248462	0.194321
Sbno2	1.35576	1.2039	0.831642	-0.950145	-1.07113	-1.25192	0.358879	-0.522195	0.0452038
2210016F16Rik	1.39068	1.32566	0.834582	-1.00576	-1.05271	-1.14673	0.109087	-0.403496	-0.0513058
Rnf125	1.4713	1.2065	0.688829	-0.887066	-1.1543	-1.30053	0.194141	-0.237567	0.0186983
Scaf11	1.17378	1.49407	0.612005	-0.826098	-1.06124	-1.37937	0.107965	-0.438128	0.317012
Mob1a	1.82502	0.8928	0.735053	-0.889878	-0.914814	-1.20418	-0.144359	-0.455886	0.156238
Nup153	1.74337	0.872494	0.812936	-0.817153	-0.887379	-1.33569	-0.105551	-0.493722	0.210696
Pdpn	1.65924	1.17476	0.6921	-0.74474	-1.03421	-1.19578	-0.0221799	-0.575389	0.0461993
Exo1	1.51152	1.23868	0.734244	-0.682482	-1.20357	-1.20766	-0.330255	-0.311469	0.250995
Ptprj	1.47961	1.26465	0.840773	-0.928974	-1.07083	-1.0047	0.288605	-0.545101	-0.324036
Spsb1	1.55372	1.32495	0.71555	-0.984358	-0.730216	-1.12623	0.237271	-0.474788	-0.515905
Sfxn5	1.47773	1.2101	0.909295	-1.21825	-0.606803	-0.920003	0.246136	-0.834394	-0.263818
Ap1ar	1.60559	1.19408	0.888265	-0.923085	-0.807693	-0.997297	0.16299	-0.721465	-0.401384
Sema6b	1.69633	1.01115	0.884923	-0.78752	-0.877637	-1.00522	0.282637	-0.837469	-0.367183
Il21	1.76307	1.21898	0.507883	-0.868293	-0.868293	-0.868293	0.248397	-0.868293	-0.265155
Plac8	1.20323	1.26664	0.966387	-1.24852	-0.810041	-1.21008	0.284293	-0.501442	0.0495347
Slfn10-ps	1.42468	0.992119	1.13682	-1.14559	-0.743007	-1.20478	0.267491	-0.507649	-0.220085
Brd1	1.36469	1.19385	0.972246	-1.18238	-1.01809	-0.919585	-0.00893443	-0.651514	0.249719
6430527G18Rik	1.32711	1.34294	0.844439	-0.701929	-1.16595	-1.17917	0.249697	-0.641522	-0.075615
Nfil3	1.47286	1.33232	0.748121	-0.556808	-1.17244	-1.18685	0.0460529	-0.630696	-0.0525596
Lsm14a	1.40502	1.23069	0.978129	-0.498442	-1.34417	-0.942135	0.172748	-0.700994	-0.300848
Eps15	1.27459	1.52944	0.771051	-0.650079	-0.970267	-0.923895	0.19184	-1.08029	-0.142388
Fblim1	1.1718	1.48772	0.865656	-0.446741	-1.02539	-1.19768	0.248068	-0.944446	-0.158981
Spata13	1.43958	1.07828	0.773372	-0.543016	-1.2379	-1.30447	0.407778	-0.683208	0.0695908
Avpr1a	1.37957	1.11997	0.7668	-0.430512	-1.15225	-1.51327	0.374449	-0.557755	0.0130008
Ugdh	1.25955	1.21622	0.691274	-0.399376	-1.41165	-1.36494	0.50859	-0.419644	-0.0800249
Steap2	1.53565	0.994806	0.642021	-0.427995	-1.37123	-1.17858	0.602321	-0.629857	-0.167138
P2ry14	1.32811	1.03518	0.872912	-0.239397	-1.29862	-1.29862	0.537011	-0.818621	-0.117966
Aldh1l1	1.20881	0.992777	0.575722	-0.363265	-1.18181	-1.44359	1.07327	-0.638045	-0.223873
Apol6	1.10036	0.904012	0.93395	-0.531874	-1.09176	-1.59645	0.889706	-0.527408	-0.0805395
Traf3ip3	0.846723	1.33433	0.849999	-0.139875	-0.880081	-1.73514	0.56296	-0.810917	-0.0280022
Wt1	1.12661	1.37116	0.281658	-0.07314	-0.967811	-1.74309	0.685811	-0.551087	-0.130109
Usp12	1.17695	0.683092	0.686627	-0.833519	-1.17866	-1.44037	1.21214	-0.122479	-0.18378
Slco2a1	1.14095	0.847502	0.985054	-0.844955	-1.12979	-1.25097	1.05951	-0.458033	-0.349272
Ppyr1	1.38504	1.02686	0.547212	-1.08051	-1.08051	-1.08051	0.979444	-0.455875	-0.241159
Gak	1.1178	0.768074	0.742111	-1.09517	-0.704059	-1.64937	1.07729	-0.149112	-0.107554
Mettl7b	1.15584	1.10242	0.889199	-1.34548	-0.680711	-1.34548	0.675252	-0.135051	-0.315982
Tmprss2	1.12692	0.744165	1.17338	-0.734206	-0.941765	-1.52405	0.813753	-0.0359059	-0.62229
Stat3	0.539135	1.79371	0.738021	-0.833964	-0.933091	-1.47095	0.011506	-0.242474	0.398106
AI314180	0.784596	1.58752	0.863876	-0.721106	-1.04402	-1.27589	0.187301	-0.812383	0.430113
Tirap	0.60478	1.78899	0.875414	-0.442847	-0.805467	-1.60412	0.178035	-0.440122	-0.154666
Tjp1	0.0472605	1.59784	1.09985	-1.01805	-0.719341	-1.27286	0.834956	-0.602266	0.0326071
Tnfrsf11a	0.596139	1.25127	0.82698	-0.931976	-0.701346	-1.65896	0.726479	-0.666167	0.557571
Cpne3	0.402305	1.77974	0.507318	-0.477207	-1.36453	-1.27795	0.767464	-0.317989	-0.0191496
Fmn1	0.627643	1.3117	0.497019	-0.324804	-1.32928	-1.35118	0.884709	-0.902117	0.58631
Ep400	0.645462	1.18061	0.833644	-0.670616	-0.929012	-0.981041	1.36798	-1.11148	-0.335548
Zmynd17	1.06632	0.803366	1.45217	-0.764025	-0.776319	-0.924027	0.596241	-1.29975	-0.153976
Epsti1	0.89387	0.587846	1.06379	-0.585064	-0.850904	-1.35781	1.0604	-1.23056	0.418428
Ccdc6	0.735859	0.878859	0.71744	-1.63583	-0.4886	-1.17299	1.22412	-0.547081	0.288224
Kif21a	1.00151	1.13986	0.33132	-1.42672	-0.398255	-1.19603	0.74248	-0.931704	0.737537
Tpbg	1.42173	1.20884	0.361309	-0.978187	-1.79504	-0.13394	-0.00992498	-0.343143	0.268354
Kif5c	1.69487	0.597984	0.238963	-0.901499	-1.7855	-0.38035	0.514779	-0.37829	0.399044
Gm5454	0.939371	0.840316	0.576555	-1.18786	-2.03835	-0.156479	0.254902	0.134711	0.636833
Sgsm1	1.08936	0.711738	0.531826	-1.2026	-1.95908	-0.439051	0.339248	0.482633	0.44593
Brd2	0.714883	0.741566	1.35107	-1.07011	-1.80243	-0.320211	0.0310734	-0.349012	0.703168
Pik3c2a	0.426112	0.806677	0.964894	-1.1218	-1.55378	-0.769079	0.55519	-0.49822	1.19
Abl2	0.733134	1.1117	1.0652	-1.46488	-0.853286	-0.697694	0.695258	-1.02756	0.438133
Apof	1.2594	0.938469	0.783273	-1.32634	-0.674707	-0.547903	0.891627	-1.26764	-0.0561747
Slco5a1	0.795202	1.39805	0.812168	-1.82545	-0.58368	-0.0134762	0.311913	-0.987184	0.0924582
Znrf3	1.23718	1.08707	0.902897	-1.24964	-1.50186	-0.153363	0.203994	-0.738344	0.212062
Pstpip1	1.2021	1.10426	1.14368	-0.762167	-1.50681	-0.250196	0.348228	-0.93474	-0.344352
Il2rb	0.664803	1.32158	0.821416	-1.14924	-1.63508	-0.0738553	0.72365	-0.776378	0.103107
G3bp2	0.538892	1.77032	1.12554	-0.812529	-1.11902	-0.989555	-0.277179	-0.513407	0.276941
Rftn1	0.757588	1.5321	1.21949	-0.800023	-1.35814	-0.915371	-0.24625	-0.403327	0.213936
Fam126a	0.553038	1.81307	0.856503	-0.811321	-1.37063	-0.850105	0.0897795	-0.568204	0.28787
Fbln2	0.732507	1.49075	1.04383	-1.29726	-1.28915	-0.803968	0.0990115	-0.261956	0.286242
Cep152	0.196125	1.90369	1.14328	-1.06534	-1.13914	-0.673067	-0.116993	-0.348165	0.0996074
Il1rn	0.114248	1.74784	1.29063	-1.10371	-1.25165	-0.566465	-0.278517	-0.178559	0.226174
Sh3pxd2b	0.812365	1.58079	1.10646	-1.09364	-0.952699	-1.0963	-0.220086	-0.424495	0.287602
Tmem173	0.835207	1.50854	1.36012	-1.06173	-0.940877	-0.942234	-0.302972	-0.428894	-0.0271581
2010106G01Rik	0.885466	1.59357	1.21148	-0.915354	-1.03104	-0.67551	-0.59305	-0.677536	0.201973
Rad18	0.778402	1.60277	1.19782	-1.06226	-0.911967	-0.686014	-0.568859	-0.711113	0.361221
Sdc4	0.741263	1.97533	0.487155	-0.883205	-1.21923	-0.494035	0.0798452	-0.871854	0.184733
Spred2	0.318654	1.79612	1.12272	-0.647825	-1.18331	-0.470953	0.43284	-1.0354	-0.332847
Mmp19	0.35829	1.37556	1.386	-0.370606	-1.56034	-1.05165	0.376755	-0.487685	-0.0263298
2610203C20Rik	0.490198	1.15988	1.42277	-0.454125	-1.41338	-1.18866	0.69213	-0.501169	-0.207643
Clspn	0.803617	1.46979	1.09525	-0.3828	-1.4656	-1.28458	0.0538764	-0.193967	-0.0955815
Rarg	0.660782	1.52606	1.28532	-0.786757	-1.34934	-0.477539	0.105976	-0.0140873	-0.950409
Gm5431	0.46712	1.32289	1.47726	-0.806727	-1.50466	-0.402389	0.448469	-0.314357	-0.687608
Ndst2	0.690581	1.04676	1.71285	-0.85649	-1.41929	-0.776821	-0.0188245	-0.376548	-0.0022116
4833403I15Rik	0.572533	1.35282	1.54686	-0.537737	-1.57512	-0.47146	-0.194239	-0.645611	-0.0480432
Gna13	0.339489	1.17202	1.85711	-0.601476	-1.32165	-0.580909	-0.590094	-0.476629	0.202131
A230046K03Rik	0.571688	1.41142	1.74318	-0.781041	-0.852832	-0.681136	-0.387771	-0.800696	-0.222804
AI504432	0.723551	1.21443	1.71579	-0.858242	-0.987276	-0.4765	-0.320022	-1.00844	-0.00328935
BC030867	0.723847	1.20616	1.76885	-1.0889	-1.01627	-0.545359	-0.392134	-0.267244	-0.388953
Akap2	0.937685	1.26049	1.30739	-0.92436	-1.03763	-1.06598	-0.292268	-0.663888	0.478557
Slc25a30	0.780279	1.30535	1.43497	-0.797282	-1.28186	-0.91057	-0.0320278	-0.693663	0.194802
Sec61a2	1.16916	1.22188	1.26522	-0.738426	-1.39641	-0.931876	-0.192939	-0.371211	-0.0253919
Oas3	0.953673	1.04648	1.36054	-0.917899	-1.23899	-1.29266	0.0990782	-0.212293	0.202067
BC016423	0.644541	1.13561	1.65049	-0.420009	-1.3904	-1.02241	-0.115997	-0.619313	0.137497
Trim30c	0.700234	1.3236	1.49978	-0.460765	-1.21442	-1.21442	-0.395607	-0.403404	0.165
Smc4	0.580976	0.858397	1.51167	0.235223	-1.77811	-1.09397	-0.0604944	-0.435761	0.182072
Nsl1	0.966166	0.877461	1.233	0.480504	-1.73817	-1.07461	-0.0176743	-0.592537	-0.134149
Zcchc6	0.589266	0.695139	1.63538	-0.023819	-1.86744	-0.803271	0.345213	-0.485297	-0.0851676
Upf2	0.800409	0.989364	1.54963	-0.348236	-1.68049	-0.64857	0.185519	-0.755131	-0.0925022
Atrn	0.515226	0.893159	1.31626	0.0251521	-1.48014	-1.04733	0.362659	-1.19063	0.605644
Rasa1	0.200753	0.887901	1.88166	0.533776	-1.18306	-0.990876	-0.291781	-0.931527	-0.106847
4930422G04Rik	0.223604	1.28035	1.75204	0.0342805	-1.4737	-0.716918	-0.0527413	-0.564332	-0.482583
D17H6S56E-5	1.05348	1.12781	1.33775	0.172305	-1.41154	-0.863829	-0.427051	-0.935461	-0.0534626
Setx	0.716502	1.37989	1.33929	0.234511	-0.966184	-0.811662	-0.560905	-1.35148	0.0200401
Mastl	0.732757	1.56398	1.11701	0.20984	-0.922775	-1.325	-0.609868	-0.858843	0.0929017
Phf11	0.969081	1.01595	1.5471	0.0599821	-0.486729	-1.24288	-0.547772	-1.24288	-0.0718633
Spag1	0.833913	1.29603	1.37393	-0.292608	-1.11394	-0.80058	0.178971	-1.30746	-0.168249
Ifnb1	1.09635	1.0417	1.53601	-0.400802	-1.01007	-1.01007	-0.348127	-1.01007	0.105073
Rfwd3	1.63452	0.89218	0.731128	-0.30903	-1.50206	-1.06933	0.377119	-0.57192	-0.182596
Ddx51	1.6346	0.789316	0.822349	-0.391273	-1.46555	-1.14863	0.394226	-0.477945	-0.157089
Ttc39b	1.59512	1.00249	0.848762	-0.263348	-1.38913	-1.0852	0.237679	-0.630046	-0.316334
Lin9	1.4704	0.841218	0.875531	-0.104039	-1.61318	-1.01963	0.502798	-0.520634	-0.432466
Batf3	1.42601	0.940001	1.03845	-0.197265	-1.56726	-0.981948	0.28779	-0.559546	-0.386234
Lmcd1	1.54585	1.00927	0.744302	-0.308219	-1.708	-0.87435	0.233366	-0.333616	-0.308601
Fam102b	1.36139	1.26075	0.605479	-0.550018	-1.69598	-0.744367	0.435741	-0.480069	-0.192927
Gcnt2	1.44495	0.984684	0.966826	-0.691012	-1.54747	-0.960023	0.285236	-0.330671	-0.152515
Cd63	1.80339	0.664373	0.753378	-0.194267	-1.38777	-1.15746	0.327932	-0.415265	-0.3943
Sdc1	1.96378	0.777851	0.570419	-0.118209	-1.19615	-1.16934	0.0515763	-0.514924	-0.365006
Fem1b	1.86886	0.932495	0.635721	-0.524542	-1.22563	-0.986808	0.224679	-0.50974	-0.415042
Mt2	1.7824	1.00499	0.658196	-0.363304	-1.06417	-1.24596	0.229778	-0.565083	-0.43684
Tgfbr1	1.85425	0.885079	0.339292	-0.343948	-1.38864	-1.04888	0.353565	-0.625168	-0.025554
Bdkrb1	1.75185	1.04752	0.402144	-0.174559	-1.46186	-1.0831	0.0399475	-0.572087	0.0501409
Il13ra1	1.48101	0.781919	0.70524	-0.684899	-1.44322	-1.35924	0.537447	-0.0773123	0.0590583
C1galt1	1.45517	0.766384	0.740422	-0.609761	-1.50051	-1.40764	0.328376	0.0491038	0.178456
Tspan4	1.36908	0.536936	0.736863	-0.515002	-1.60252	-1.40264	0.681123	0.0256995	0.17047
Cdh23	1.48133	0.627851	0.639853	-0.593332	-1.63829	-1.11521	0.707838	-0.383052	0.273021
Tgif1	1.74564	0.519317	0.747818	-1.0449	-1.23962	-1.1135	0.496777	-0.0906016	-0.0209291
Sirt1	1.73299	0.33397	0.676308	-0.814228	-1.40979	-1.11823	0.715611	-0.121619	0.00498815
Cask	1.36741	0.501609	0.812698	-0.555944	-1.56288	-1.15677	1.01883	-0.210182	-0.214768
Ednra	1.41282	0.541909	0.611972	-0.474636	-1.64214	-1.16552	0.977591	0.0498579	-0.311852
Pros1	1.70718	0.648329	0.505288	-0.642199	-1.45454	-1.09611	0.765241	-0.195265	-0.237926
Tagln2	2.01754	0.499191	0.0831669	0.0060763	-0.890068	-1.53341	0.526748	-0.334323	-0.374926
Gsr	2.09309	0.430631	0.439817	-0.0335207	-0.902947	-1.43164	0.214527	-0.409482	-0.400469
Cenpi	1.71946	0.834975	0.0481833	0.173725	-1.46072	-1.4656	0.0914118	0.134188	-0.0756232
Slc44a3	1.52097	0.671504	0.370337	0.340131	-1.29546	-1.66577	0.608364	-0.210005	-0.340068
Antxr1	1.96013	0.438058	-0.0738103	0.301343	-1.3409	-1.23808	0.577252	-0.386041	-0.237955
Lrrc8d	1.95481	0.187077	0.314189	0.387544	-1.58657	-0.987353	0.236356	-0.583814	0.0777615
Nudt9	1.66878	0.159069	0.450528	-0.208464	-1.58094	-1.26519	0.908183	-0.136133	0.00416233
Gnb4	1.56939	0.221291	0.180314	-0.0184834	-1.75823	-1.24945	0.864126	0.232879	-0.0418328
Neo1	1.40766	-0.0853924	0.352732	-0.237589	-1.71415	-1.14032	1.25002	0.170663	-0.00362425
Glis3	1.54346	0.598499	-0.0608428	-0.398021	-1.55847	-0.903122	1.30488	-0.339664	-0.186717
Mdga1	1.46945	0.411494	0.163322	-0.295544	-1.86349	-0.940523	1.07403	0.143036	-0.161782
2610109H07Rik	1.52529	0.788989	-0.283566	-0.575978	-1.63133	-0.52682	1.11784	-0.634186	0.219754
Uck2	1.70188	1.13509	-0.0417447	-0.535836	-0.968691	-1.45871	0.509234	-0.437617	0.096403
Arl15	1.78614	1.15321	0.0359438	-0.596091	-1.156	-1.22163	0.351272	-0.409732	0.0568873
Jak2	1.72465	0.718353	0.416299	-0.708518	-1.08841	-1.39779	0.70346	-0.4421	0.0740573
Ncl	1.96847	0.476848	0.324126	-0.312172	-0.560037	-1.64915	0.43438	-0.687883	0.00541059
BC027231	1.98027	0.439333	0.13941	-0.559008	-0.663995	-1.29116	0.696642	-0.956147	0.214649
Taf1d	1.50384	0.536184	0.773546	-0.697435	-0.641034	-1.91356	0.218373	-0.222838	0.442926
Guf1	1.72884	0.382943	0.553022	-0.498841	-0.655815	-1.89716	0.510377	-0.140431	0.0170649
Tgm1	1.28115	0.880391	0.812576	-0.705629	-0.924695	-1.76393	0.60742	-0.28384	0.0965552
Gnptab	1.7267	1.01311	0.254261	-0.508797	-0.22095	-1.81125	0.21398	-0.521734	-0.145322
Ttll6	1.39873	0.870174	0.663348	-0.868412	-0.253947	-1.89993	0.494475	-0.416309	0.0118756
Pitpnb	1.85816	0.676411	0.410265	-1.05947	-0.183061	-1.50013	0.48573	-0.489673	-0.198233
Atl2	1.85407	0.550724	0.349507	-0.364554	-1.13589	-1.56226	0.173029	-0.274426	0.409794
Nkrf	1.8842	0.564944	0.273403	-0.0574488	-1.02868	-1.51817	-0.125169	-0.576998	0.583926
Usp1	1.88844	0.0881625	0.624826	0.116727	-1.21356	-1.54462	-0.0860284	-0.209071	0.335128
G6pdx	2.08385	0.079787	0.145532	-0.588403	-0.67185	-1.56696	-0.227347	0.218526	0.526866
Ssbp4	1.28344	0.503916	0.640884	-0.456647	-1.28183	-1.40649	1.29619	-0.361492	-0.217972
Pla1a	1.2392	0.354738	0.732663	-0.349941	-1.44885	-1.45386	1.17185	-0.300349	0.0545477
Ppfia1	1.50947	0.321185	0.703718	-0.55835	-1.29356	-1.26764	1.12494	-0.514837	-0.0249239
Slc12a7	1.12831	0.247921	0.443715	-0.182341	-1.34464	-1.55891	1.46189	-0.240752	0.0447996
Gpr64	1.48491	0.191159	0.585534	-0.434947	-1.28207	-1.63063	0.950576	-0.00658942	0.14206
Jun	1.10443	0.190456	0.826447	-1.02164	-0.998452	-1.14248	1.58252	-0.449738	-0.0915373
Exoc6b	1.14656	0.55663	0.0430804	-0.583709	-1.26571	-1.47465	1.4966	0.122022	-0.0408256
Frmd5	0.886441	0.106921	-0.225485	-0.559707	-1.26872	-1.33513	1.71594	-0.0282329	0.707967
Lgals3	1.17126	-0.307987	0.433529	-0.58002	-1.29007	-1.55279	1.23165	0.538064	0.356366
Phf16	1.3365	-0.139771	0.0591601	-0.889123	-1.47412	-1.10809	1.23011	0.473968	0.511368
Zfp36	0.875042	-0.357381	0.698069	-1.0259	-1.45599	-0.929472	1.52316	0.47195	0.200532
Nptxr	1.50632	-0.917063	0.408012	-0.694096	-1.2419	-0.941894	1.2442	0.142531	0.493884
Plp2	2.0505	0.172888	0.196917	-0.635683	-1.09887	-1.37612	0.434154	0.119812	0.136401
Hist1h2bp	1.66991	0.329056	0.329522	-0.732279	-1.29358	-1.48429	0.349505	0.65426	0.177896
Tnfrsf19	1.77959	-0.442736	0.466074	-0.437647	-1.27478	-1.34854	0.378892	0.796398	0.0827604
Hist1h3h	0.979949	1.1216	-0.342307	-1.05749	-0.589757	-1.70267	0.453862	0.0955369	1.04127
Hist1h2ae	1.19985	1.01452	-0.612534	-0.680038	-0.743982	-1.6987	0.20919	0.237305	1.07438
Hist1h3e	1.00108	1.00284	-0.435549	-1.10094	-0.165195	-1.89211	0.234874	0.747665	0.60734
Hist1h2bb	1.20816	0.640759	-0.395745	-0.458891	-0.820467	-1.98873	0.544951	0.759449	0.510516
Hist2h3b	1.72023	0.798647	-0.365054	-0.552274	-0.667506	-1.74922	0.13503	0.0161483	0.663999
Serpina3n	1.0093	0.786615	0.457407	-0.451927	-1.19048	-1.78574	1.15404	-0.0636588	0.084437
Med12l	0.733276	0.793234	0.385744	-0.693942	-1.01661	-1.76862	1.41011	-0.0639227	0.220722
Fgf23	0.683627	1.01223	0.475161	-0.190527	-1.22214	-1.93134	0.970046	-0.0727268	0.275666
AF064781	0.702838	1.45275	0.43472	-1.08821	-1.04038	-1.41748	0.868153	-0.250458	0.338071
Six2	1.01113	1.08307	0.202525	-0.751854	-1.37047	-1.37181	1.0407	-0.335716	0.492411
Apln	1.16831	1.38821	-0.403225	-0.353281	-0.88528	-1.72124	0.790188	-0.149334	0.165651
Rbm24	0.786158	1.43	-0.129926	-0.556027	-0.829406	-1.87075	0.83899	-0.0144045	0.345362
Ndrg1	0.761741	0.165363	0.340892	-0.782532	-1.71042	-1.2683	0.973361	0.876703	0.643189
Panx1	0.606573	0.0592656	0.595468	-0.427764	-1.73101	-1.40664	0.705667	1.21181	0.386632
Angptl2	0.994698	-0.201646	0.028869	-0.256475	-1.64758	-1.32329	1.27269	0.86337	0.269359
Sh2d4a	1.19555	-0.0362827	0.0750258	-0.103777	-1.52039	-1.65417	0.95315	0.573468	0.517427
Ptx3	0.520047	0.26015	0.640001	-0.209873	-1.10982	-2.10055	1.00554	0.326085	0.668417
Dact2	0.285373	-0.209541	0.396331	-0.0124802	-1.1875	-1.96077	0.983113	0.708208	0.997272
Hist1h2be	0.904499	0.650612	-0.187841	-0.43856	-1.56656	-1.54614	0.624152	0.980169	0.579668
Tmod3	0.600707	0.790153	0.284053	-0.415709	-1.56425	-1.71412	0.599459	0.777176	0.642537
Hist1h4m	0.754093	0.34304	-0.032957	-0.230411	-1.15591	-1.95961	0.283693	0.941333	1.05673
Rnf213	0.965268	0.980211	1.37633	-1.27477	-0.982102	-1.18713	0.378499	-0.266346	0.0100409
Trim30a	0.99152	0.972105	1.3874	-1.10553	-1.02795	-1.31855	0.309794	-0.181154	-0.0276387
Eif2ak2	0.993534	1.04242	1.35137	-1.15878	-1.11355	-1.15432	0.309384	-0.297257	0.0271888
Lgals3bp	1.04092	1.03188	1.26892	-1.16852	-1.1792	-1.17425	0.26597	-0.169989	0.0842779
Ogfr	1.11821	0.84272	1.47514	-1.22146	-1.09095	-1.06104	0.121842	-0.200873	0.0164188
Igtp	0.981814	0.909026	1.43244	-1.34432	-1.06063	-1.06503	0.284743	-0.0889179	-0.0491293
Parp12	1.0453	0.880431	1.39901	-0.995105	-1.23314	-1.22534	0.359951	-0.171908	-0.0591898
Isg15	1.0906	0.87212	1.37294	-1.11171	-1.29574	-1.05655	0.326972	-0.159568	-0.0390612
Samd9l	1.15134	0.792676	1.42374	-1.02946	-1.22875	-1.09557	0.39317	-0.28009	-0.127057
Dhx58	0.977397	0.778248	1.46139	-1.04022	-1.26241	-1.16832	0.485206	-0.131452	-0.0998441
Trim34a	1.01886	0.818297	1.43937	-1.05114	-1.17481	-1.15783	0.546322	-0.223015	-0.21607
Stat2	1.06824	0.838857	1.31039	-1.06052	-1.26862	-1.16416	0.548285	-0.210177	-0.062303
Usp18	1.07488	0.899866	1.206	-1.29998	-1.14833	-1.17166	0.439156	-0.0556509	0.0557136
Ifi44	1.04233	0.940607	1.17399	-1.28886	-1.14881	-1.21324	0.408414	-0.0738469	0.159423
Irf7	0.956802	0.91235	1.25147	-1.27217	-1.22772	-1.14774	0.485202	-0.0368205	0.0786281
Ddx58	0.895966	0.97163	1.30685	-1.35944	-1.10552	-1.12709	0.420811	-0.119219	0.116004
Cmpk2	0.923928	0.824678	1.41411	-1.07495	-1.03448	-1.39233	0.481691	-0.244661	0.102024
Irgm1	0.820154	0.849576	1.44346	-1.20281	-1.28996	-1.11798	0.393737	0.0300851	0.0737332
Gbp7	0.876864	0.794813	1.50561	-1.1456	-1.12258	-1.23151	0.480302	-0.0697408	-0.0881645
Ifih1	0.915951	0.901695	1.61624	-1.06703	-1.07754	-1.12964	0.252951	-0.280068	-0.132561
Tlr3	1.00012	1.0149	1.53374	-1.06281	-1.09362	-1.01164	0.249228	-0.252262	-0.377663
Ly6e	1.15804	0.976028	1.4103	-1.06821	-1.00583	-1.1187	0.264101	-0.471866	-0.143875
Trim12c	1.03217	0.836158	1.53187	-1.22396	-1.02817	-0.945971	0.451778	-0.224752	-0.429123
Ddx60	0.94592	0.91059	1.35776	-1.21967	-1.14732	-0.993396	0.66888	-0.431257	-0.0915107
BC006779	1.1294	0.968725	1.3199	-1.24938	-1.02038	-1.08802	0.36414	-0.345082	-0.0793075
Trim25	1.16465	0.913056	1.26231	-1.25435	-1.05828	-1.1111	0.427184	-0.32525	-0.0182192
Trex1	1.27892	0.830995	1.31568	-1.28788	-0.965926	-1.05212	0.359626	-0.242997	-0.236295
Trim30d	1.17359	0.851301	1.38901	-1.18437	-1.07159	-1.11663	0.321569	-0.2086	-0.154275
Gm4955	1.41294	0.910874	1.20122	-1.1622	-1.1622	-0.917681	0.204923	-0.35889	-0.128996
Ifit1	1.17923	0.83859	1.42996	-0.82362	-1.2039	-1.09057	0.471958	-0.412108	-0.389543
Ifit3	1.10897	0.620405	1.5905	-0.82752	-1.15974	-1.11573	0.541514	-0.371837	-0.386566
Shisa5	1.30634	0.596052	1.54239	-0.9104	-1.22664	-0.949798	0.304336	-0.25455	-0.40773
Tdrd7	1.2866	0.73039	1.40836	-0.997421	-0.883717	-1.2516	0.44803	-0.442415	-0.298236
AW011738	1.20422	0.695983	1.45325	-1.07709	-1.03699	-1.11098	0.513328	-0.405558	-0.236154
H2-Q10	1.21998	0.851596	1.34954	-0.970358	-0.962112	-1.1827	0.529037	-0.22956	-0.60543
Parp10	0.965649	0.647978	1.69789	-1.00388	-1.25929	-0.99752	0.324813	-0.179514	-0.196121
Herc6	0.913624	0.780096	1.74289	-0.918912	-1.19893	-0.927388	0.335643	-0.352324	-0.374704
Slfn9	0.832707	0.871213	1.69034	-0.79229	-1.33342	-1.06004	0.227033	-0.303007	-0.132533
Gm12185	0.680126	0.895727	1.6384	-0.98156	-1.14194	-1.18419	0.50253	-0.354126	-0.0549669
Olfr56	0.729937	0.948687	1.54334	-1.04511	-1.3155	-0.918907	0.569554	-0.432957	-0.0790438
Ctsb	0.910705	0.865233	1.34198	-0.896257	-1.3535	-1.10934	0.774732	-0.187248	-0.346295
I830012O16Rik	1.05474	0.591847	1.52102	-0.975562	-1.29177	-1.02002	0.649824	-0.25644	-0.273648
Gbp2	0.884353	0.736408	1.53909	-1.2457	-0.820903	-1.31195	0.55132	-0.147829	-0.184791
Gbp6	0.940882	0.925761	1.59825	-1.08334	-0.785638	-1.27819	0.28999	-0.233474	-0.374237
Trim12a	0.880765	0.635947	1.73154	-0.980376	-0.92984	-1.17693	0.575962	-0.307974	-0.429088
Oasl2	1.0777	0.824258	1.23848	-1.13448	-1.20063	-1.23102	0.601815	-0.130901	-0.0452184
Mx2	1.09495	0.839152	1.22031	-1.07323	-1.14672	-1.34752	0.558088	-0.112243	-0.0327897
Adar	0.973932	0.934674	1.27273	-1.13109	-1.19925	-1.26214	0.471111	-0.138808	0.0788425
Zbp1	1.12803	0.955817	1.15349	-1.00787	-1.30549	-1.22768	0.47483	-0.175053	0.00392431
Bst2	1.12598	0.845295	1.15005	-1.12684	-1.14236	-1.37881	0.444821	-0.0538119	0.135686
Slfn8	1.04044	0.84623	1.1726	-1.09018	-1.23036	-1.35178	0.541476	0.0131451	0.0584284
H2-Q7	1.07714	0.771856	1.23777	-1.00239	-1.21653	-1.40059	0.483444	-0.099106	0.148401
Parp14	1.19009	0.820133	1.21057	-0.917323	-1.14485	-1.38538	0.557659	-0.230384	-0.100509
D14Ertd668e	1.18089	0.791927	1.25241	-1.01921	-1.19786	-1.29005	0.496407	-0.142691	-0.071816
Zc3hav1	1.23583	0.708977	1.25751	-0.933949	-1.29035	-1.2996	0.394581	-0.0820971	0.00910188
Ifi203	1.11154	0.7679	1.22311	-0.958573	-1.12119	-1.46015	0.592406	-0.140263	-0.0147761
Gbp5	1.06367	0.712687	1.27925	-0.875604	-1.07413	-1.52449	0.654103	-0.227528	-0.00795741
Ifi204	1.13671	0.716732	1.19201	-0.858127	-1.09336	-1.61097	0.441943	-0.117563	0.192626
Mnda	1.28764	0.785319	1.24945	-0.761157	-1.10687	-1.44476	0.397109	-0.329554	-0.0771766
Ifi205	1.06392	0.914275	1.31043	-0.750502	-1.06672	-1.5367	0.37449	-0.333922	0.0247283
Parp9	1.18375	0.79539	1.17148	-0.803376	-1.28442	-1.37603	0.6005	-0.184059	-0.103233
Dtx3l	1.20161	0.770144	1.20525	-0.81264	-1.25772	-1.35814	0.597938	-0.228278	-0.118158
Stat1	1.18691	0.60662	1.2333	-0.771169	-1.35133	-1.33091	0.681805	-0.207203	-0.0480305
Erap1	1.16214	0.708998	1.18522	-0.645657	-1.33806	-1.50433	0.516959	-0.0220709	-0.063204
Mndal	0.947259	0.559404	1.4063	-0.895229	-1.22184	-1.43976	0.666741	-0.0154504	-0.00742795
Mx1	1.02196	0.724078	1.32811	-0.941553	-1.25924	-1.3576	0.584779	0.000399443	-0.100932
Uba7	0.962485	0.614878	1.48846	-0.772652	-1.23094	-1.37953	0.639194	-0.114354	-0.207543
Irf9	0.988733	0.772656	1.04899	-1.18047	-1.36943	-1.24896	0.661544	0.11266	0.214283
Rtp4	0.982826	0.82101	1.0521	-1.18092	-1.37908	-1.23771	0.606419	0.148577	0.186785
Apol9a	1.03477	0.83161	1.08102	-1.19087	-1.28908	-1.2905	0.497058	0.0544641	0.271533
Apol9b	1.06783	0.874698	1.09723	-1.11772	-1.38114	-1.21737	0.444165	-0.00133402	0.233647
Psmb8	0.998488	0.743433	1.25814	-0.980769	-1.43077	-1.27023	0.456069	0.188514	0.0371294
Oas1b	1.03173	0.822784	1.26462	-1.00716	-1.41402	-1.18488	0.491434	-0.00576162	0.00126406
Irgm2	0.84652	0.798532	1.2886	-1.38329	-1.1893	-1.1621	0.510917	0.101961	0.18816
Xaf1	0.888812	0.896211	1.28192	-1.29106	-1.1237	-1.272	0.44109	0.0372434	0.141495
Gbp3	0.837388	0.813639	1.27883	-1.18616	-1.2243	-1.31553	0.58001	0.057579	0.158543
Ifi47	0.663903	0.810293	1.37856	-1.30286	-1.06427	-1.36277	0.488933	0.17762	0.210594
H2-Q6	0.926025	0.654401	1.18356	-1.05168	-1.28232	-1.45735	0.514602	0.109947	0.402815
Tap1	1.29384	0.522899	1.31495	-1.32008	-0.986128	-1.15526	0.495195	0.00349673	-0.168904
Zfp942	1.17667	0.354133	1.21854	-1.46047	-0.984637	-1.17327	0.695238	0.204593	-0.0308036
Ifitm3	1.38272	0.970846	1.23479	-1.07673	-0.911689	-1.24454	0.0302186	-0.248356	-0.13726
Mlkl	1.5593	0.741042	1.29917	-0.912009	-0.831153	-1.25986	-0.0455025	-0.459755	-0.0912294
Nup188	1.4095	0.650132	1.24506	-1.01216	-0.624096	-1.49367	0.4079	-0.463564	-0.119113
Psme2	1.09009	0.963639	1.36159	-1.03603	-0.751324	-1.5111	-0.283362	0.166229	0.000264958
Gm4902	1.04941	1.02415	1.40097	-0.708685	-0.816541	-1.62816	0.0293468	-0.125435	-0.225061
Dhfr	1.28081	0.475224	1.47665	-0.784621	-1.3052	-1.24632	-0.168412	0.0481783	0.223686
E330016A19Rik	1.20256	0.406158	1.44439	-0.789052	-1.24446	-1.43857	0.165485	0.160917	0.0925711
Eea1	1.33765	0.254433	1.52662	-0.327668	-1.22438	-1.46088	0.148315	-0.228173	-0.0259228
Parp11	1.09932	0.547462	1.74378	-1.06531	-1.0377	-1.04265	0.0967824	0.0346318	-0.376315
Btc	1.2346	0.0421742	1.71551	-0.959996	-1.1119	-1.11277	0.311402	0.0645393	-0.183559
Efhd2	1.14057	0.156066	1.10909	-1.11273	-1.26633	-1.25398	0.761416	0.646576	-0.180689
Psmb9	0.855187	0.454073	1.23437	-1.19948	-1.2741	-1.14494	1.0556	0.169869	-0.150582
Sla	0.608488	0.525728	1.04717	-0.615375	-1.33269	-1.56866	1.03133	0.667508	-0.363491
Snx10	0.609821	0.316565	1.54141	-1.19177	-0.832454	-1.38678	0.338637	0.941854	-0.337279
Sclt1	0.64586	0.395439	1.5169	-0.442249	-1.37981	-1.49116	-0.370322	0.435903	0.689442
4930447C04Rik	0.782795	0.168207	1.69995	-0.44941	-0.914475	-1.78168	0.0330511	0.503623	-0.0420684
Itpr3	0.956576	0.75152	0.586098	-1.0007	-1.31851	-1.33618	1.26431	-0.106889	0.203772
Samd5	0.93942	0.530084	0.698387	-1.23211	-1.34957	-1.23618	1.16844	0.240289	0.241242
Zfp385b	1.11768	0.53804	0.429169	-1.05341	-1.17609	-1.5546	1.06823	0.19866	0.432326
Krt80	1.17225	0.882391	0.697011	-1.45826	-0.856849	-1.3795	0.665144	-0.102614	0.380421
Mcoln2	0.955604	0.827927	0.704188	-1.26041	-1.31188	-1.35568	0.678487	0.319762	0.441999
Arntl2	1.25357	0.277929	0.342107	-1.64298	-1.38767	-0.608607	0.945412	0.34432	0.475918
Ier5	1.39811	0.842023	0.344917	-1.78241	-0.799731	-0.982363	0.547644	0.0699645	0.361838
Tmtc4	1.13127	1.10588	0.34612	-1.52982	-0.553637	-1.52447	0.398675	0.473772	0.152222
Trim5	0.932643	0.648353	0.582204	-1.75769	-0.638798	-1.26211	1.08465	0.304308	0.106444
Plekho1	1.49061	0.719841	0.71175	-1.71052	-0.506346	-0.978648	0.492442	0.306857	-0.525989
Fbxo30	0.885907	1.41413	0.901695	-0.668666	-1.42695	-1.11368	-0.524054	-0.0966932	0.628309
Trub2	0.62587	1.4833	0.982729	-0.710557	-1.47011	-1.01086	-0.632268	0.157623	0.574267
Gins1	0.888189	1.33344	0.952639	-0.896255	-1.40609	-1.05931	-0.575845	0.372063	0.391171
Gmnn	1.41324	1.22435	0.921249	-0.778282	-1.44051	-0.73779	-0.644856	0.102385	-0.0597774
Cenph	1.26614	1.04712	1.07828	-0.835924	-1.49026	-0.891983	-0.582073	0.211836	0.196855
Ogg1	1.1251	0.889129	1.24579	-0.527811	-1.55668	-0.770138	-0.805942	-0.228024	0.628578
Ctbp2	1.70202	0.949484	0.580178	-0.909976	-1.09628	-1.24037	-0.149063	-0.2792	0.44321
Pcgf5	1.51017	0.756193	0.847855	-0.954613	-1.19707	-1.31852	0.12123	-0.272289	0.507043
Zfp280c	1.39564	0.874737	0.604521	-0.790854	-1.50604	-1.17436	0.271646	-0.348693	0.673403
Ddx10	1.55161	0.652224	0.394271	-1.07429	-1.40013	-1.01806	-0.202928	0.218839	0.878457
Hnrpll	1.20158	0.883473	0.396994	-0.834419	-0.994716	-1.71022	-0.270104	0.50011	0.827301
Pdcd6	1.4349	0.695033	0.422738	-0.954239	-1.27737	-1.29429	-0.350417	0.839378	0.484264
Cstf3	1.58324	0.741343	0.442929	-0.659602	-1.27611	-0.94309	-1.02485	0.345695	0.790447
Tspo	1.27046	0.843421	0.756733	-0.97639	-1.40251	-1.32855	0.0281663	0.614977	0.193688
Rpa3	1.12425	1.17236	0.893926	-1.00605	-1.4675	-1.01433	-0.22213	0.562799	-0.0433123
Stk19	1.42371	0.957628	0.72899	-1.11906	-1.59789	-0.797936	-0.00109848	0.197401	0.208257
Mcl1	1.00972	0.456316	1.00083	-0.807979	-1.93244	-0.855025	0.0503826	0.724242	0.353952
Psen1	0.879662	0.604832	1.06783	-0.774189	-1.67722	-1.06794	-0.43002	0.755036	0.642009
Anp32e	1.2388	0.960353	0.529176	0.0756681	-1.66537	-1.46854	-0.308645	0.437826	0.200736
Cenpq	1.08664	0.999481	0.859079	0.26227	-1.73914	-1.31291	-0.257863	0.362162	-0.259717
Pcna	1.38775	0.142921	0.808471	0.0879602	-1.91336	-1.19792	0.0217277	0.52681	0.135639
Grem1	0.609413	0.748724	0.800086	-0.317982	-2.30024	-0.682906	0.405612	0.110787	0.626508
B3gnt2	0.768785	0.764915	0.997301	-0.416928	-2.112	-0.939095	0.230234	0.282012	0.42478
Atad2	0.180626	0.65031	1.47729	-0.129435	-2.04465	-0.958926	0.182723	0.374407	0.267651
Csrp2bp	0.476421	-0.0169641	1.22863	-0.338392	-1.85627	-1.15459	0.414527	0.164514	1.08212
Foxn2	1.13874	-0.149905	0.695318	-0.663003	-1.82472	-1.01478	0.168655	0.757119	0.892576
Zfp202	1.31988	-0.174691	0.930019	-0.458882	-1.73434	-1.18989	0.560888	0.114152	0.632858
Atp2a3	1.32336	-0.316153	1.16174	-0.269474	-2.02451	-0.492662	-0.185648	0.283368	0.519974
Ifi27l2a	0.809257	1.0409	1.08766	-1.32269	-1.17741	-1.29205	0.334565	0.144957	0.374801
Oas1a	0.828986	1.07505	1.17528	-1.34496	-1.01661	-1.3335	0.198227	0.0889797	0.328536
Oas2	0.845765	1.03896	1.16982	-1.20629	-1.30029	-1.2116	0.305315	-0.00178828	0.360102
Oas1g	0.70829	1.06634	1.20268	-1.37055	-1.30443	-1.02782	0.040299	0.197522	0.487674
Ddx24	1.07186	0.893834	1.11334	-1.50186	-1.09653	-1.04935	0.164149	-0.0667597	0.471314
Lgals9	0.817888	1.20641	1.25497	-1.49437	-0.861235	-1.14316	0.0562001	0.0463837	0.116911
Iigp1	0.767585	1.05179	1.21334	-1.58287	-0.813825	-1.22771	0.359688	0.0935099	0.138495
Gm4951	0.50281	1.03222	1.30725	-1.69273	-0.908048	-1.02525	0.137934	0.277075	0.368745
F830016B08Rik	0.367287	1.15346	1.4723	-1.43813	-1.07048	-1.00389	0.215257	-0.00978902	0.313979
Eps8	0.356759	1.18547	1.30215	-1.33176	-1.22283	-0.845338	0.37983	-0.472759	0.648482
Lrp2	0.397667	1.07141	1.27715	-1.41174	-0.841453	-1.25932	0.300817	-0.304417	0.769892
Znfx1	0.463065	0.573775	1.90705	-0.878434	-1.40789	-0.906504	0.455555	-0.190142	-0.0164726
Ehd4	0.335137	0.812458	1.7595	-0.980187	-1.31388	-1.12094	0.15101	-0.0470313	0.403941
Psmb10	0.639293	0.557795	1.69086	-1.2283	-1.01368	-1.22986	0.581395	0.132232	-0.12973
Tgtp1	0.408123	1.09716	1.54958	-1.20981	-0.986512	-1.269	0.410258	0.0806117	-0.0803988
Psme1	0.353297	1.0449	1.57096	-1.72116	-0.581129	-0.960111	0.0166045	0.304145	-0.0275044
Gm4841	0.247779	1.11391	1.582	-1.39335	-0.479551	-1.39335	-0.0357803	0.270823	0.0875117
Sp110	0.156846	0.941118	1.83315	-1.50356	-0.547699	-0.954319	-0.382079	0.29011	0.16643
Ly6a	0.501091	0.793965	0.932588	-1.57705	-0.938376	-1.38936	0.643534	0.481187	0.552422
Tgtp2	0.376605	0.811863	1.2713	-1.49987	-1.04198	-1.27721	0.437474	0.462019	0.459799
Chl1	0.305636	1.26873	1.09141	-1.50339	-0.819798	-1.34957	0.350668	0.411192	0.24513
Gvin1	0.730721	0.999401	1.20251	-1.22533	-0.898928	-1.54832	0.494518	-0.0182647	0.263687
Gm4070	0.722493	0.974819	1.13399	-1.45726	-0.832093	-1.44318	0.482016	0.10272	0.316495
Gm8979	-0.012146	0.975321	1.37718	-1.12786	-0.611366	-1.73915	0.356869	0.233922	0.547226
Gm8989	-0.012146	0.975321	1.37718	-1.12786	-0.611366	-1.73915	0.356869	0.233922	0.547226
Dok1	0.665752	1.26715	1.00337	-1.05661	-1.4443	-1.22446	0.38007	0.11936	0.289671
Nphs2	0.558616	1.27307	0.996582	-0.792215	-1.44617	-1.44617	0.383885	0.187597	0.284792
Rad51ap1	0.776555	1.12931	1.05543	-0.77105	-1.28622	-1.60376	0.223358	0.346354	0.130023
Flot2	0.383589	1.43593	0.823579	-0.980236	-0.917568	-1.70121	0.58997	0.202088	0.163856
Nedd4l	-0.0215522	0.812736	0.953974	-1.71028	-0.613509	-1.31516	0.331221	0.597875	0.964702
Ly6c1	0.258618	0.904741	0.609792	-1.50264	-0.867092	-1.50134	0.670114	0.641282	0.786526
Mios	-0.251536	1.05496	1.03569	-0.971637	-1.14565	-1.51838	0.402212	0.531048	0.86329
Elfn1	0.039961	1.20332	0.971853	-1.33392	-1.29362	-1.11174	0.233632	0.523066	0.767454
Hoxb7	0.301211	0.426814	1.52137	-1.2546	-1.13966	-1.15935	-0.211913	0.78399	0.73214
Slfn5	0.31345	0.834498	1.46491	-1.09532	-0.966749	-1.42537	-0.332213	0.437792	0.769004
Sp100	0.0125171	0.897559	1.64272	-1.42887	-1.10648	-0.953346	0.228599	0.449653	0.257653
Hpgd	0.191008	0.94797	1.38253	-0.976833	-1.5109	-1.14041	0.084456	0.718891	0.30329
Fam83f	-0.172997	0.182933	1.55186	-1.0773	-1.16441	-1.20395	0.244789	0.537426	1.10166
Irf1	-0.242788	0.700555	1.60529	-1.82727	-0.718582	-0.615252	0.304127	0.73746	0.0564552
Gbp9	0.0592331	0.651352	1.65518	-1.83137	-0.662213	-0.834055	0.475566	0.250095	0.236211
Gm20422	0.237605	0.184567	0.974081	-1.94183	-0.875218	-0.780164	0.663041	1.07966	0.458256
Skiv2l2	0.383648	1.27718	0.994607	-1.28448	-1.26838	-0.677382	-0.776106	0.67421	0.676706
Etaa1	-0.0153617	1.33429	1.20369	-1.51833	-1.21386	-0.228358	-0.617919	0.542281	0.513567
Lman2	0.300838	1.09709	0.782508	-1.4391	-1.28225	-0.953699	-0.1937	0.899524	0.788784
Tgs1	0.207814	0.875944	1.27518	-1.4191	-1.7765	-0.120842	0.456933	0.400225	0.100348
Fos	0.875249	1.23896	0.674832	-1.4294	-1.59983	-0.430448	0.378534	0.51323	-0.221131
Mfsd5	0.679026	0.417972	1.93955	-0.76321	-1.2026	-0.693045	-0.950489	0.17271	0.40008
Pkmyt1	0.531365	0.238888	2.0523	-0.882086	-1.10205	-0.485645	-0.975922	0.503416	0.119734
Foxred2	0.297276	0.383488	1.8784	-1.04198	-1.40396	-0.369714	-0.727895	0.61124	0.373145
Vmp1	0.555968	1.00482	1.7796	-0.824367	-0.875261	-0.778419	-1.18642	0.126406	0.197674
Dok5	-0.148845	1.13648	1.3887	-0.690122	-1.13089	-0.789309	-1.14713	0.924999	0.456125
Il6st	0.217633	1.00867	0.360989	-1.00149	-1.17719	-1.47985	1.22452	-0.00573575	0.852462
Stt3b	0.108742	1.15378	0.609514	-0.692114	-1.24706	-1.51813	1.07167	-0.320345	0.833937
Scaf8	0.191225	1.33912	0.706586	-1.07141	-1.06498	-1.55867	0.656767	0.0790013	0.722361
Scel	-0.111591	1.2027	0.917989	-1.02731	-0.919206	-1.62175	0.756124	0.0315299	0.771515
Mycbp2	-0.345842	1.36705	0.572369	-0.64358	-1.08206	-1.46106	1.29907	-0.194583	0.488631
Ammecr1	-0.0210285	1.33904	0.767787	-0.834866	-1.12153	-1.46208	1.14345	-0.220934	0.410154
Samhd1	-0.373377	1.00202	0.82921	-1.2446	-0.842018	-1.39831	1.17292	0.0991159	0.755049
Acsl1	0.255231	0.526091	0.422036	-0.565401	-1.0721	-1.97866	1.12413	0.614444	0.674227
Trib1	0.300069	0.643973	0.1214	-0.732533	-1.12252	-1.77983	1.30179	0.539094	0.728558
9630033F20Rik	0.0322497	0.977633	0.0948798	-0.820141	-0.696816	-1.87961	1.23805	0.169736	0.884016
Sorbs2	-0.667026	1.55305	0.629229	-0.918457	-0.337712	-1.73767	0.658825	0.410883	0.408886
Diras2	-0.06999	1.11633	0.399936	-1.79084	-0.201844	-1.38825	0.894905	0.329496	0.710253
Sgol1	0.0786817	1.45668	0.842476	-1.40847	-0.356175	-1.38024	-0.505315	0.838203	0.434158
Gm8773	0.0529425	1.50189	0.520886	-1.34329	-0.522501	-1.56019	0.297756	0.923772	0.128725
Tmtc2	0.0999452	1.20661	0.81177	-1.98129	0.107302	-1.01559	-0.428198	0.555146	0.644305
Col24a1	0.474861	0.982215	0.433851	-1.90395	-0.443228	-1.00985	-0.34984	0.975214	0.840728
Lap3	0.524176	0.258747	0.333694	-1.59174	-0.681293	-1.11876	0.110573	0.395808	1.76879
Gclm	0.458498	1.4874	0.521913	-0.93485	-0.849596	-1.64246	-0.17146	0.151072	0.979483
Wrnip1	0.610137	1.44769	0.599724	-1.05357	-0.900905	-1.53707	-0.332866	0.363839	0.803025
Ccnyl1	0.187067	1.46501	0.684136	-0.95522	-0.567317	-1.30855	-0.714885	-0.15712	1.36688
Vcan	0.833528	1.55181	-0.229465	-1.18137	-0.724162	-1.49473	0.204688	0.287677	0.752031
5730590G19Rik	0.981718	1.61737	-0.0943095	-1.09335	-0.781882	-1.25233	0.00647534	-0.342397	0.958693
Dynlrb1	0.189901	2.27005	0.500818	-1.20651	-0.732976	-0.732831	-0.127068	-0.0599218	-0.101468
S1pr1	-0.126427	2.2944	0.427541	-0.832882	-0.839577	-0.972144	0.27513	-0.327575	0.101536
St3gal1	-0.0466795	1.9704	0.163523	-1.00186	-1.34779	-0.844721	0.114018	0.340577	0.65253
Mmp3	0.962838	0.801369	0.833232	0.71796	-0.12177	0.525559	-0.786491	-1.39202	-1.54067
Dgka	0.940757	0.603745	1.06051	0.344939	-0.125528	0.884072	-0.947398	-1.38735	-1.37374
Slc43a3	1.18672	0.637883	0.912653	0.222774	0.385067	0.477858	-1.09202	-1.32023	-1.41071
Phtf2	0.622281	0.75805	0.592405	1.02091	-0.0458532	0.87187	-1.2243	-1.38659	-1.20878
Dvl1	0.951056	0.382647	0.628197	0.182619	1.10785	0.488526	-1.018	-1.75624	-0.966658
Abcb8	0.8207	0.502675	0.759039	0.0342815	0.879114	0.791373	-1.27083	-1.65587	-0.860486
Sult5a1	0.827628	0.0678539	0.543713	0.289693	0.815427	1.13479	-1.05157	-1.77226	-0.855277
Vps33b	0.337736	0.536633	0.982256	0.510213	1.0448	0.392541	-1.21172	-1.68251	-0.909954
Chrm4	0.276592	0.524513	0.799012	0.369129	1.16437	0.711971	-1.46243	-1.31929	-1.06387
Fgf7	1.00994	0.913738	-0.136702	1.11466	0.168762	0.447816	-1.38556	-1.54646	-0.586194
Rgs2	0.795257	1.15261	-0.0590139	0.5454	0.494782	0.687552	-1.75979	-1.24452	-0.612272
Dgat1	0.574268	0.955318	0.638618	0.786559	-0.0336655	0.609558	-1.72099	-1.52092	-0.288744
Calcrl	1.13206	0.141216	0.660713	0.924262	0.502481	0.342611	-1.75636	-1.14327	-0.803716
Angptl4	1.15109	0.668836	0.685715	0.272459	0.742668	0.250828	-1.58201	-1.38535	-0.804242
Casd1	0.578414	0.574747	0.0946412	0.659096	0.900597	0.954933	-1.80175	-0.993226	-0.967447
1500009L16Rik	0.231007	0.540917	0.0158196	0.749236	0.806366	1.33965	-1.51637	-1.06052	-1.1061
ORF61	0.595316	0.507829	0.689422	0.261789	0.461599	1.20076	-1.62909	-1.46569	-0.621932
Tfpi2	0.807728	0.884856	0.318438	-0.0363067	0.0973874	1.34456	-1.82474	-0.641431	-0.950497
Fosb	0.79937	1.0525	0.36413	0.151793	0.264882	1.10195	-1.5367	-0.964225	-1.23369
Epn2	0.0142068	1.08911	0.497736	-0.222011	1.28429	0.803754	-1.53336	-0.954177	-0.979552
Csmd3	0.317839	0.918798	0.737192	-0.366672	1.22918	0.753862	-1.20824	-1.21307	-1.16889
Sh3bgrl2	0.251154	0.779287	0.913266	-0.541524	0.862075	1.11542	-1.6095	-1.055	-0.71518
Aifm2	0.351714	0.793781	0.733695	-0.836397	1.11733	1.05959	-1.02612	-0.798179	-1.39541
4931406P16Rik	-0.444621	0.523892	0.961534	0.0782922	1.13035	1.1716	-1.28372	-1.15478	-0.98254
Rarb	0.0184547	0.815786	0.595774	0.0735633	1.04057	1.13503	-1.06187	-1.46676	-1.15055
Mbd1	0.0048818	0.5605	0.486047	0.0182349	0.718708	1.67025	-0.880776	-1.13966	-1.43818
Bnc2	0.115693	1.02152	0.229652	0.27708	1.36285	0.501986	-0.67497	-1.75853	-1.07529
Madcam1	-0.293036	0.9724	0.953291	-0.422785	1.41386	0.538572	-0.647029	-1.18669	-1.32858
Cp	0.251905	1.17422	0.858385	-0.344076	1.38569	-0.0742366	-1.44825	-1.06448	-0.739149
Wsb1	0.475574	1.02234	0.846795	-0.308833	1.19586	0.234869	-1.57333	-1.23241	-0.660865
Egfr	-0.188322	1.66337	0.690942	-0.622127	0.681536	0.721208	-1.42186	-1.04919	-0.475559
Ttc19	-0.160096	1.52014	1.13436	-0.618622	0.537185	0.507609	-1.42834	-1.12974	-0.362496
Msi2	-0.0151503	1.49905	0.0484981	0.642071	0.628377	0.630606	-1.35464	-1.56367	-0.515147
Rbm47	-0.0854788	1.54427	-0.263788	0.199254	1.14315	0.451799	-1.16598	-1.60664	-0.21659
Mrc2	-0.962897	0.646113	0.514706	0.884827	0.672329	1.3004	-1.10581	-1.38778	-0.56189
Grm7	-0.83306	0.597545	1.25384	0.504934	0.970647	0.721543	-1.25568	-1.26452	-0.695247
Ccl7	0.827261	1.46342	0.423787	0.481717	0.755729	-0.707442	-1.3461	-1.14528	-0.753094
Mtf2	0.836623	1.35098	0.642759	0.753856	0.38906	-0.632641	-1.12527	-1.44064	-0.77472
Ccl2	0.493366	0.935747	1.01968	0.775476	0.703763	-0.600619	-1.71991	-1.06232	-0.545182
Crabp1	0.281131	1.67388	0.875012	0.37855	-0.00640633	-0.245952	-1.74971	-1.02769	-0.178799
Suv420h1	1.12665	0.891971	0.887983	0.383757	0.271309	-0.145061	-0.742836	-1.9607	-0.713064
Clstn3	0.921244	0.802153	1.015	0.320245	0.657776	-0.0986752	-0.784422	-1.80622	-1.0271
Dot1l	0.89229	1.37459	0.429936	0.28106	0.657432	-0.11975	-0.797769	-1.72922	-0.988576
Ptch2	-0.147406	1.45608	0.706712	0.499122	0.564329	0.0449638	-0.35212	-2.02769	-0.743998
Mib1	0.0503225	1.61701	1.38635	-1.01835	0.387736	-0.184493	-0.791887	-1.25524	-0.19145
Rbm26	0.0313937	1.39734	1.26078	-0.492228	0.546745	0.131128	-0.674144	-1.81527	-0.385748
9930111J21Rik2	-0.465146	1.11407	1.60561	-0.242601	1.04148	-0.521061	-0.645368	-1.3634	-0.523581
Cpt1a	0.23194	0.484308	0.0114013	0.919971	1.45242	0.525229	-1.17868	-1.4442	-1.00239
Fgfr1op	0.206797	0.184491	-0.134347	1.25952	1.64143	0.0985897	-1.26471	-0.870012	-1.12176
Lrba	-0.503223	0.356487	-0.030451	1.04435	1.84655	0.238576	-0.662135	-1.12742	-1.16273
Dnmt3a	0.0560309	-0.0239708	0.474077	1.02177	1.20604	0.868493	-0.937721	-1.1214	-1.54333
Ppp1r3a	-0.174657	0.237431	0.582916	0.82976	1.13712	1.05392	-1.22216	-1.22216	-1.22216
Dhrs3	-0.0133119	0.469678	0.542008	0.704734	1.31989	0.685743	-0.879373	-1.43007	-1.3993
Usp43	0.0482413	-0.0241635	-0.00819874	0.798357	1.67095	0.733092	-0.458979	-1.30025	-1.45906
Grap	0.260668	0.101659	0.0422333	0.841961	1.42566	0.859308	-0.766586	-1.25976	-1.50515
Fam129a	0.708043	-0.944076	0.516482	0.63998	1.76007	0.199966	-1.0951	-0.882613	-0.902755
Pigo	0.396974	-0.413045	0.318719	0.18422	1.48395	1.29641	-1.33874	-0.99389	-0.934597
Serpinf1	1.08035	-0.205323	-0.209003	1.47356	0.421548	0.708578	-0.704103	-1.04946	-1.51615
Pdgfrl	0.35732	-0.293221	-0.51924	1.51913	1.16584	0.669992	-0.496045	-0.837373	-1.56641
Prpf40b	0.311669	-0.415758	0.51688	1.26375	0.692681	0.855053	-0.23322	-1.24328	-1.74778
Dpy19l1	0.830339	0.434368	0.29863	1.41568	0.613095	-0.0488239	-0.766379	-1.71039	-1.06652
Slc11a2	0.928528	0.112811	-0.125752	1.34648	1.2514	-0.204	-1.13095	-1.22462	-0.953898
Saa3	1.22885	0.782608	-0.0900571	0.796713	1.03512	-0.792655	-0.499269	-1.58876	-0.872555
Il10rb	0.867021	0.479905	-0.181102	0.806116	1.46899	0.0545895	-0.990101	-1.08602	-1.4194
Pnpla3	0.619457	0.731691	-0.029946	0.812688	1.25908	0.110792	-0.552844	-1.19052	-1.7604
Ifngr2	0.985805	-0.0275225	-0.94088	1.30237	1.12009	0.518777	-0.973499	-0.946828	-1.03831
Zc3h12a	1.22551	-0.222629	-0.797799	0.916462	1.42406	0.328218	-1.11082	-1.03721	-0.725791
Cxcl1	0.868892	0.953134	-0.667904	0.916572	1.15305	0.0545308	-1.315	-1.15688	-0.806393
Secisbp2l	-0.242325	0.243154	-0.372988	1.41139	0.409926	1.51357	-1.13293	-1.32384	-0.505954
Tmem184c	-0.282295	0.689286	-0.828843	1.36567	0.619255	1.23101	-1.1862	-1.18771	-0.420171
Ppp3ca	0.248719	-0.194249	-0.756478	1.42681	0.742326	1.40815	-0.944207	-0.930922	-1.00015
Phospho1	0.282903	-0.0476515	-0.367646	1.3998	0.627154	1.2905	-0.571731	-1.41336	-1.19997
Abtb2	-1.10192	0.00256864	-0.125907	1.68092	0.290496	1.366	-0.233688	-1.23515	-0.643326
Stap2	-0.829466	-0.222837	0.100481	1.24013	0.462583	1.76052	-0.541883	-1.27438	-0.695148
Lgr6	-0.550732	-0.153709	0.732376	1.49689	-0.22036	1.38389	-1.32373	-1.03512	-0.32951
Fgf1	0.507773	0.342901	0.775813	1.46987	-0.912877	0.815748	-0.771284	-1.49256	-0.735376
Acadm	-1.74149	-0.926465	-0.828639	0.719967	0.931209	1.22508	-0.0185318	0.726558	-0.0876917
Ctsf	-1.81092	-0.894548	-0.814778	0.609186	0.986606	1.12852	-0.0287195	0.798065	0.0265856
Pxmp4	-1.80837	-0.893701	-0.806748	0.911553	0.811656	1.13718	0.00499681	0.70273	-0.0592912
2017-03-02	-1.94621	-0.751695	-0.802535	0.687095	0.869139	1.17483	0.184511	0.600945	-0.0160775
Rhof	-2.00439	-0.626592	-0.822962	0.761083	0.839701	1.15755	0.249592	0.4745	-0.0284757
Mfap2	-1.95792	-0.551917	-0.546612	0.662229	1.07407	1.28378	-0.322344	0.457433	-0.0987256
Pbx4	-1.8279	-0.591881	-0.650047	0.626199	1.12687	1.34452	-0.183334	0.508182	-0.352605
Ttc23	-1.78594	-0.814213	-0.679853	0.611378	1.15352	1.24211	-0.261754	0.603942	-0.0691868
Col4a5	-1.90349	-0.86285	-0.412378	0.810727	1.15755	1.16343	-0.253803	0.120969	0.179836
Ogn	-1.9176	-0.82598	-0.611408	0.774486	1.1794	1.11364	0.0280181	0.155047	0.104401
Gm996	-1.88781	-0.607578	-0.582913	0.555751	1.32856	1.25819	-0.216397	0.153068	-0.000867999
Apoe	-1.95254	-0.947308	-0.29481	0.552703	1.20045	1.09777	-0.00641492	0.483512	-0.133367
Snx18	-1.71602	-1.05912	-0.732445	0.460826	1.47638	0.825708	-0.0480878	0.454133	0.338621
Znf512b	-1.9912	-0.837204	-0.5049	0.406715	1.4463	0.792742	0.0838986	0.348841	0.254802
Prr5l	-1.91833	-1.03942	-0.348137	0.200724	0.855663	1.40541	0.00988919	0.523808	0.310389
Abcb9	-1.85668	-1.03929	-0.485763	0.278091	0.76653	1.42134	-0.019165	0.706345	0.228595
Lancl1	-1.66261	-1.3976	-0.446003	0.430766	0.934704	1.25287	0.0269904	0.63456	0.226329
Atp6v0a1	-1.9747	-0.926081	-0.514986	0.636882	0.875518	0.992223	-0.291719	0.680501	0.522366
2310003H01Rik	-1.87284	-1.06296	-0.617374	0.393916	1.10617	0.896021	0.00496436	0.836939	0.315156
Gsn	-1.74068	-1.07349	-0.890724	0.825908	0.783747	1.14488	0.210529	0.592553	0.147279
[truncated: 2,111 more rows]

## Sheet: STAT3_SMAD_up5k_down200_human_
gene_name	promoter_region	motif_id.STAT3	motif_alt_id.STAT3	start.STAT3	stop.STAT3	strand.STAT3	score.STAT3	p.value.STAT3	q.value.STAT3	matched_sequence.STAT3	motif_id.SMAD	motif_alt_id.SMAD	start.SMAD	stop.SMAD	strand.SMAD	score.SMAD	p.value.SMAD	q.value.SMAD	matched_sequence.SMAD	motif_distance	DE_upiCAF_downmyCAF
NAT2	NM_000015.2::chr8:18243754-18248954(+)	MA0144.2	STAT3	18	28	+	13.2245	2.11e-05	0.402	CTGCCAGGAAA	MA0513.1	SMAD2::SMAD3::SMAD4	2080	2092	+	14.7213	5.8e-06	0.129	ctgtctgtctctt	2052	None
NAT2	NM_000015.2::chr8:18243754-18248954(+)	MA0144.2	STAT3	18	28	+	13.2245	2.11e-05	0.402	CTGCCAGGAAA	MA0513.1	SMAD2::SMAD3::SMAD4	3328	3340	+	10.6885	7.15e-05	0.307	gtggctaacacca	3300	None
NAT2	NM_000015.2::chr8:18243754-18248954(+)	MA0144.2	STAT3	18	28	+	13.2245	2.11e-05	0.402	CTGCCAGGAAA	MA0513.1	SMAD2::SMAD3::SMAD4	4219	4231	-	18.2623	1.86e-07	0.129	ATGTCTGTCACCT	4191	None
NAT2	NM_000015.2::chr8:18243754-18248954(+)	MA0144.2	STAT3	18	28	+	13.2245	2.11e-05	0.402	CTGCCAGGAAA	MA0513.1	SMAD2::SMAD3::SMAD4	1672	1684	-	10.082	9.62e-05	0.329	CTGTCTCAGACCT	1644	None
ACAT1	NM_000019.3::chr11:107987257-107992457(+)	MA0144.2	STAT3	2551	2561	+	13.5102	1.81e-05	0.395	cttctggaaaa	MA0513.1	SMAD2::SMAD3::SMAD4	3644	3656	-	15.1639	3.99e-06	0.129	CAGTCTCGCACTT	1083	None
ACAT1	NM_000019.3::chr11:107987257-107992457(+)	MA0144.2	STAT3	2551	2561	+	13.5102	1.81e-05	0.395	cttctggaaaa	MA0513.1	SMAD2::SMAD3::SMAD4	4646	4658	-	10.5246	7.74e-05	0.307	CACTCTGTCACCC	2085	None
ACAT1	NM_000019.3::chr11:107987257-107992457(+)	MA0144.2	STAT3	2551	2561	+	13.5102	1.81e-05	0.395	cttctggaaaa	MA0513.1	SMAD2::SMAD3::SMAD4	769	781	+	13.5082	1.37e-05	0.179	ctgtctcTCTCtt	1770	None
ACAT1	NM_000019.3::chr11:107987257-107992457(+)	MA0144.2	STAT3	2551	2561	+	13.5102	1.81e-05	0.395	cttctggaaaa	MA0513.1	SMAD2::SMAD3::SMAD4	1617	1629	+	14.3934	7.35e-06	0.129	gtggctcacacct	922	None
ACAT1	NM_000019.3::chr11:107987257-107992457(+)	MA0144.2	STAT3	1324	1334	+	11.3673	5.72e-05	0.465	CTTCTAGAAAG	MA0513.1	SMAD2::SMAD3::SMAD4	3644	3656	-	15.1639	3.99e-06	0.129	CAGTCTCGCACTT	2310	None
ACAT1	NM_000019.3::chr11:107987257-107992457(+)	MA0144.2	STAT3	1324	1334	+	11.3673	5.72e-05	0.465	CTTCTAGAAAG	MA0513.1	SMAD2::SMAD3::SMAD4	4646	4658	-	10.5246	7.74e-05	0.307	CACTCTGTCACCC	3312	None
ACAT1	NM_000019.3::chr11:107987257-107992457(+)	MA0144.2	STAT3	1324	1334	+	11.3673	5.72e-05	0.465	CTTCTAGAAAG	MA0513.1	SMAD2::SMAD3::SMAD4	769	781	+	13.5082	1.37e-05	0.179	ctgtctcTCTCtt	543	None
ACAT1	NM_000019.3::chr11:107987257-107992457(+)	MA0144.2	STAT3	1324	1334	+	11.3673	5.72e-05	0.465	CTTCTAGAAAG	MA0513.1	SMAD2::SMAD3::SMAD4	1617	1629	+	14.3934	7.35e-06	0.129	gtggctcacacct	283	None
ACVRL1	NM_000020.2::chr12:52296201-52301401(+)	MA0144.2	STAT3	3421	3431	+	14.5306	8.3e-06	0.376	GTTCTGGGAAT	MA0513.1	SMAD2::SMAD3::SMAD4	3099	3111	+	10.4426	8.06e-05	0.311	GTGACTCTCAGCT	310	None
ACVRL1	NM_000020.2::chr12:52296201-52301401(+)	MA0144.2	STAT3	3421	3431	+	14.5306	8.3e-06	0.376	GTTCTGGGAAT	MA0513.1	SMAD2::SMAD3::SMAD4	4741	4753	+	10.5082	7.8e-05	0.308	CTGTCTCCCACGG	1310	None
ACVRL1	NM_000020.2::chr12:52296201-52301401(+)	MA0144.2	STAT3	3421	3431	+	14.5306	8.3e-06	0.376	GTTCTGGGAAT	MA0513.1	SMAD2::SMAD3::SMAD4	3261	3273	-	11.4426	4.76e-05	0.281	CTGTCTTTCACAC	148	None
ACVRL1	NM_000020.2::chr12:52296201-52301401(+)	MA0144.2	STAT3	3421	3431	+	14.5306	8.3e-06	0.376	GTTCTGGGAAT	MA0513.1	SMAD2::SMAD3::SMAD4	1243	1255	-	12.5574	2.52e-05	0.239	GTGCCTGTCACCA	2166	None
ACVRL1	NM_000020.2::chr12:52296201-52301401(+)	MA0144.2	STAT3	3421	3431	+	14.5306	8.3e-06	0.376	GTTCTGGGAAT	MA0513.1	SMAD2::SMAD3::SMAD4	532	544	+	14.1967	8.43e-06	0.141	ctgtcttccacct	2877	None
ACVRL1	NM_000020.2::chr12:52296201-52301401(+)	MA0144.2	STAT3	4206	4216	+	13.8163	1.41e-05	0.383	CTGCCTGGAAG	MA0513.1	SMAD2::SMAD3::SMAD4	3099	3111	+	10.4426	8.06e-05	0.311	GTGACTCTCAGCT	1095	None
ACVRL1	NM_000020.2::chr12:52296201-52301401(+)	MA0144.2	STAT3	4206	4216	+	13.8163	1.41e-05	0.383	CTGCCTGGAAG	MA0513.1	SMAD2::SMAD3::SMAD4	4741	4753	+	10.5082	7.8e-05	0.308	CTGTCTCCCACGG	525	None
ACVRL1	NM_000020.2::chr12:52296201-52301401(+)	MA0144.2	STAT3	4206	4216	+	13.8163	1.41e-05	0.383	CTGCCTGGAAG	MA0513.1	SMAD2::SMAD3::SMAD4	3261	3273	-	11.4426	4.76e-05	0.281	CTGTCTTTCACAC	933	None
ACVRL1	NM_000020.2::chr12:52296201-52301401(+)	MA0144.2	STAT3	4206	4216	+	13.8163	1.41e-05	0.383	CTGCCTGGAAG	MA0513.1	SMAD2::SMAD3::SMAD4	1243	1255	-	12.5574	2.52e-05	0.239	GTGCCTGTCACCA	2951	None
ACVRL1	NM_000020.2::chr12:52296201-52301401(+)	MA0144.2	STAT3	4206	4216	+	13.8163	1.41e-05	0.383	CTGCCTGGAAG	MA0513.1	SMAD2::SMAD3::SMAD4	532	544	+	14.1967	8.43e-06	0.141	ctgtcttccacct	3662	None
ADA	NM_000022.3;NM_001322051.1;NM_001322050.1::chr20:43280200-43285398(-)	MA0144.2	STAT3	58	68	+	11.8163	4.35e-05	0.443	gtgccaggaag	MA0513.1	SMAD2::SMAD3::SMAD4	4547	4559	+	12.1148	3.29e-05	0.257	GAGTCTCTCACGT	4479	None
ADA	NM_000022.3;NM_001322051.1;NM_001322050.1::chr20:43280200-43285398(-)	MA0144.2	STAT3	2313	2323	-	11.6531	4.78e-05	0.455	CTGCAGGGAAA	MA0513.1	SMAD2::SMAD3::SMAD4	4547	4559	+	12.1148	3.29e-05	0.257	GAGTCTCTCACGT	2224	None
ADA	NM_000022.3;NM_001322051.1;NM_001322050.1::chr20:43280200-43285398(-)	MA0144.2	STAT3	4923	4933	+	11.8776	4.31e-05	0.443	ATTCCAGGAAA	MA0513.1	SMAD2::SMAD3::SMAD4	4547	4559	+	12.1148	3.29e-05	0.257	GAGTCTCTCACGT	364	None
ADA	NM_000022.3;NM_001322051.1;NM_001322050.1::chr20:43280200-43285398(-)	MA0144.2	STAT3	4923	4933	-	13.6531	1.65e-05	0.395	TTTCCTGGAAT	MA0513.1	SMAD2::SMAD3::SMAD4	4547	4559	+	12.1148	3.29e-05	0.257	GAGTCTCTCACGT	364	None
ADA	NM_000022.3;NM_001322051.1;NM_001322050.1::chr20:43280200-43285398(-)	MA0144.2	STAT3	414	424	-	11.6735	4.71e-05	0.455	TTTCTTGAAAG	MA0513.1	SMAD2::SMAD3::SMAD4	4547	4559	+	12.1148	3.29e-05	0.257	GAGTCTCTCACGT	4123	None
ADRB2	NM_000024.5::chr5:148201155-148206355(+)	MA0144.2	STAT3	351	361	+	15.5918	2.08e-06	0.317	CTGCTGGGAAA	MA0513.1	SMAD2::SMAD3::SMAD4	4797	4809	-	10.3279	8.51e-05	0.318	CTGGCTGGCCCCA	4436	None
ADRB2	NM_000024.5::chr5:148201155-148206355(+)	MA0144.2	STAT3	2627	2637	+	11.6122	5.01e-05	0.458	TTTATGGGAAA	MA0513.1	SMAD2::SMAD3::SMAD4	4797	4809	-	10.3279	8.51e-05	0.318	CTGGCTGGCCCCA	2160	None
ADRB3	NM_000025.2::chr8:37823985-37829183(-)	MA0144.2	STAT3	2016	2026	+	10.6735	8.45e-05	0.493	TTTTTGGGAAT	MA0513.1	SMAD2::SMAD3::SMAD4	348	360	-	10.082	9.62e-05	0.329	GTGTCTGGCAGAG	1656	None
ADRB3	NM_000025.2::chr8:37823985-37829183(-)	MA0144.2	STAT3	2016	2026	+	10.6735	8.45e-05	0.493	TTTTTGGGAAT	MA0513.1	SMAD2::SMAD3::SMAD4	2936	2948	+	12.4754	2.64e-05	0.239	gtgactcacacct	910	None
ADRB3	NM_000025.2::chr8:37823985-37829183(-)	MA0144.2	STAT3	1929	1939	-	10.5714	9.09e-05	0.495	GTGCCGGAAAG	MA0513.1	SMAD2::SMAD3::SMAD4	348	360	-	10.082	9.62e-05	0.329	GTGTCTGGCAGAG	1569	None
ADRB3	NM_000025.2::chr8:37823985-37829183(-)	MA0144.2	STAT3	1929	1939	-	10.5714	9.09e-05	0.495	GTGCCGGAAAG	MA0513.1	SMAD2::SMAD3::SMAD4	2936	2948	+	12.4754	2.64e-05	0.239	gtgactcacacct	997	None
ADRB3	NM_000025.2::chr8:37823985-37829183(-)	MA0144.2	STAT3	102	112	-	13.4286	1.88e-05	0.398	GTTCTTGGAAT	MA0513.1	SMAD2::SMAD3::SMAD4	348	360	-	10.082	9.62e-05	0.329	GTGTCTGGCAGAG	236	None
ADRB3	NM_000025.2::chr8:37823985-37829183(-)	MA0144.2	STAT3	102	112	-	13.4286	1.88e-05	0.398	GTTCTTGGAAT	MA0513.1	SMAD2::SMAD3::SMAD4	2936	2948	+	12.4754	2.64e-05	0.239	gtgactcacacct	2824	None
ADRB3	NM_000025.2::chr8:37823985-37829183(-)	MA0144.2	STAT3	619	629	-	15.2653	3.67e-06	0.344	GTTCTGGGAAG	MA0513.1	SMAD2::SMAD3::SMAD4	348	360	-	10.082	9.62e-05	0.329	GTGTCTGGCAGAG	259	None
ADRB3	NM_000025.2::chr8:37823985-37829183(-)	MA0144.2	STAT3	619	629	-	15.2653	3.67e-06	0.344	GTTCTGGGAAG	MA0513.1	SMAD2::SMAD3::SMAD4	2936	2948	+	12.4754	2.64e-05	0.239	gtgactcacacct	2307	None
ADRB3	NM_000025.2::chr8:37823985-37829183(-)	MA0144.2	STAT3	4767	4777	+	16.6735	2.49e-07	0.212	CTTCTGGGAAA	MA0513.1	SMAD2::SMAD3::SMAD4	348	360	-	10.082	9.62e-05	0.329	GTGTCTGGCAGAG	4407	None
ADRB3	NM_000025.2::chr8:37823985-37829183(-)	MA0144.2	STAT3	4767	4777	+	16.6735	2.49e-07	0.212	CTTCTGGGAAA	MA0513.1	SMAD2::SMAD3::SMAD4	2936	2948	+	12.4754	2.64e-05	0.239	gtgactcacacct	1819	None
AGA	NM_000027.3;NM_001171988.1::chr4:178363458-178368656(-)	MA0144.2	STAT3	3818	3828	-	13.1633	2.19e-05	0.403	TTGCTAGGAAA	MA0513.1	SMAD2::SMAD3::SMAD4	3854	3866	+	10.1475	9.31e-05	0.328	AAGTCTCACAACT	26	None
AGA	NM_000027.3;NM_001171988.1::chr4:178363458-178368656(-)	MA0144.2	STAT3	3818	3828	-	13.1633	2.19e-05	0.403	TTGCTAGGAAA	MA0513.1	SMAD2::SMAD3::SMAD4	4399	4411	-	11.9672	3.58e-05	0.268	CTGCCTGGCACTA	571	None
AGA	NM_000027.3;NM_001171988.1::chr4:178363458-178368656(-)	MA0144.2	STAT3	3818	3828	-	13.1633	2.19e-05	0.403	TTGCTAGGAAA	MA0513.1	SMAD2::SMAD3::SMAD4	2957	2969	+	14.3934	7.35e-06	0.129	gtggctcacacct	849	None
AGA	NM_000027.3;NM_001171988.1::chr4:178363458-178368656(-)	MA0144.2	STAT3	2592	2602	-	14.1837	1.09e-05	0.377	GTGCTGGGAAG	MA0513.1	SMAD2::SMAD3::SMAD4	3854	3866	+	10.1475	9.31e-05	0.328	AAGTCTCACAACT	1252	None
AGA	NM_000027.3;NM_001171988.1::chr4:178363458-178368656(-)	MA0144.2	STAT3	2592	2602	-	14.1837	1.09e-05	0.377	GTGCTGGGAAG	MA0513.1	SMAD2::SMAD3::SMAD4	4399	4411	-	11.9672	3.58e-05	0.268	CTGCCTGGCACTA	1797	None
AGA	NM_000027.3;NM_001171988.1::chr4:178363458-178368656(-)	MA0144.2	STAT3	2592	2602	-	14.1837	1.09e-05	0.377	GTGCTGGGAAG	MA0513.1	SMAD2::SMAD3::SMAD4	2957	2969	+	14.3934	7.35e-06	0.129	gtggctcacacct	355	None
AGA	NM_000027.3;NM_001171988.1::chr4:178363458-178368656(-)	MA0144.2	STAT3	2578	2588	-	12.9388	2.49e-05	0.407	ATGCTGGGAAG	MA0513.1	SMAD2::SMAD3::SMAD4	3854	3866	+	10.1475	9.31e-05	0.328	AAGTCTCACAACT	1266	None
AGA	NM_000027.3;NM_001171988.1::chr4:178363458-178368656(-)	MA0144.2	STAT3	2578	2588	-	12.9388	2.49e-05	0.407	ATGCTGGGAAG	MA0513.1	SMAD2::SMAD3::SMAD4	4399	4411	-	11.9672	3.58e-05	0.268	CTGCCTGGCACTA	1811	None
AGA	NM_000027.3;NM_001171988.1::chr4:178363458-178368656(-)	MA0144.2	STAT3	2578	2588	-	12.9388	2.49e-05	0.407	ATGCTGGGAAG	MA0513.1	SMAD2::SMAD3::SMAD4	2957	2969	+	14.3934	7.35e-06	0.129	gtggctcacacct	369	None
AGT	NM_000029.3::chr1:230850137-230855335(-)	MA0144.2	STAT3	3276	3286	+	10.5306	9.36e-05	0.495	CTACTGGGAAG	MA0513.1	SMAD2::SMAD3::SMAD4	478	490	+	12.7541	2.22e-05	0.229	ctgtctgtcaaca	2786	Yes
AGT	NM_000029.3::chr1:230850137-230855335(-)	MA0144.2	STAT3	3276	3286	+	10.5306	9.36e-05	0.495	CTACTGGGAAG	MA0513.1	SMAD2::SMAD3::SMAD4	5158	5170	+	12.1639	3.21e-05	0.257	CAGGCTGTCACAC	1872	Yes
AGT	NM_000029.3::chr1:230850137-230855335(-)	MA0144.2	STAT3	3276	3286	+	10.5306	9.36e-05	0.495	CTACTGGGAAG	MA0513.1	SMAD2::SMAD3::SMAD4	3437	3449	-	10.4098	8.18e-05	0.313	CTGACTATCAGCT	151	Yes
AGT	NM_000029.3::chr1:230850137-230855335(-)	MA0144.2	STAT3	239	249	-	15.4898	2.84e-06	0.324	GTTCTGGGAAA	MA0513.1	SMAD2::SMAD3::SMAD4	478	490	+	12.7541	2.22e-05	0.229	ctgtctgtcaaca	229	Yes
AGT	NM_000029.3::chr1:230850137-230855335(-)	MA0144.2	STAT3	239	249	-	15.4898	2.84e-06	0.324	GTTCTGGGAAA	MA0513.1	SMAD2::SMAD3::SMAD4	5158	5170	+	12.1639	3.21e-05	0.257	CAGGCTGTCACAC	4909	Yes
AGT	NM_000029.3::chr1:230850137-230855335(-)	MA0144.2	STAT3	239	249	-	15.4898	2.84e-06	0.324	GTTCTGGGAAA	MA0513.1	SMAD2::SMAD3::SMAD4	3437	3449	-	10.4098	8.18e-05	0.313	CTGACTATCAGCT	3188	Yes
AGT	NM_000029.3::chr1:230850137-230855335(-)	MA0144.2	STAT3	371	381	+	10.8367	7.76e-05	0.483	CAtctgggaat	MA0513.1	SMAD2::SMAD3::SMAD4	478	490	+	12.7541	2.22e-05	0.229	ctgtctgtcaaca	97	Yes
AGT	NM_000029.3::chr1:230850137-230855335(-)	MA0144.2	STAT3	371	381	+	10.8367	7.76e-05	0.483	CAtctgggaat	MA0513.1	SMAD2::SMAD3::SMAD4	5158	5170	+	12.1639	3.21e-05	0.257	CAGGCTGTCACAC	4777	Yes
AGT	NM_000029.3::chr1:230850137-230855335(-)	MA0144.2	STAT3	371	381	+	10.8367	7.76e-05	0.483	CAtctgggaat	MA0513.1	SMAD2::SMAD3::SMAD4	3437	3449	-	10.4098	8.18e-05	0.313	CTGACTATCAGCT	3056	Yes
AGT	NM_000029.3::chr1:230850137-230855335(-)	MA0144.2	STAT3	1742	1752	+	10.5102	9.51e-05	0.495	TTTATTGGAAA	MA0513.1	SMAD2::SMAD3::SMAD4	478	490	+	12.7541	2.22e-05	0.229	ctgtctgtcaaca	1252	Yes
AGT	NM_000029.3::chr1:230850137-230855335(-)	MA0144.2	STAT3	1742	1752	+	10.5102	9.51e-05	0.495	TTTATTGGAAA	MA0513.1	SMAD2::SMAD3::SMAD4	5158	5170	+	12.1639	3.21e-05	0.257	CAGGCTGTCACAC	3406	Yes
AGT	NM_000029.3::chr1:230850137-230855335(-)	MA0144.2	STAT3	1742	1752	+	10.5102	9.51e-05	0.495	TTTATTGGAAA	MA0513.1	SMAD2::SMAD3::SMAD4	3437	3449	-	10.4098	8.18e-05	0.313	CTGACTATCAGCT	1685	Yes
AGT	NM_000029.3::chr1:230850137-230855335(-)	MA0144.2	STAT3	1853	1863	+	12.9388	2.49e-05	0.407	ATGCTGGGAAG	MA0513.1	SMAD2::SMAD3::SMAD4	478	490	+	12.7541	2.22e-05	0.229	ctgtctgtcaaca	1363	Yes
AGT	NM_000029.3::chr1:230850137-230855335(-)	MA0144.2	STAT3	1853	1863	+	12.9388	2.49e-05	0.407	ATGCTGGGAAG	MA0513.1	SMAD2::SMAD3::SMAD4	5158	5170	+	12.1639	3.21e-05	0.257	CAGGCTGTCACAC	3295	Yes
AGT	NM_000029.3::chr1:230850137-230855335(-)	MA0144.2	STAT3	1853	1863	+	12.9388	2.49e-05	0.407	ATGCTGGGAAG	MA0513.1	SMAD2::SMAD3::SMAD4	3437	3449	-	10.4098	8.18e-05	0.313	CTGACTATCAGCT	1574	Yes
AGT	NM_000029.3::chr1:230850137-230855335(-)	MA0144.2	STAT3	3345	3355	+	11.1633	6.35e-05	0.474	CTTATGGGAAT	MA0513.1	SMAD2::SMAD3::SMAD4	478	490	+	12.7541	2.22e-05	0.229	ctgtctgtcaaca	2855	Yes
AGT	NM_000029.3::chr1:230850137-230855335(-)	MA0144.2	STAT3	3345	3355	+	11.1633	6.35e-05	0.474	CTTATGGGAAT	MA0513.1	SMAD2::SMAD3::SMAD4	5158	5170	+	12.1639	3.21e-05	0.257	CAGGCTGTCACAC	1803	Yes
AGT	NM_000029.3::chr1:230850137-230855335(-)	MA0144.2	STAT3	3345	3355	+	11.1633	6.35e-05	0.474	CTTATGGGAAT	MA0513.1	SMAD2::SMAD3::SMAD4	3437	3449	-	10.4098	8.18e-05	0.313	CTGACTATCAGCT	82	Yes
AGXT	NM_000030.2::chr2:241803161-241808361(+)	MA0144.2	STAT3	5046	5056	+	15.5918	2.08e-06	0.317	CTGCTGGGAAA	MA0513.1	SMAD2::SMAD3::SMAD4	2062	2074	+	15.7705	2.41e-06	0.129	ctggctcacacct	2972	None
AGXT	NM_000030.2::chr2:241803161-241808361(+)	MA0144.2	STAT3	4572	4582	-	10.8163	7.88e-05	0.484	CTGATGGGAAG	MA0513.1	SMAD2::SMAD3::SMAD4	2062	2074	+	15.7705	2.41e-06	0.129	ctggctcacacct	2498	None
ABCD1	NM_000033.3::chrX:152985322-152990522(+)	MA0144.2	STAT3	3007	3017	-	11.3673	5.72e-05	0.465	GTTCTGGAAAT	MA0513.1	SMAD2::SMAD3::SMAD4	4323	4335	+	11.3607	4.97e-05	0.284	CTGCCTCTCACAC	1306	None
ABCD1	NM_000033.3::chrX:152985322-152990522(+)	MA0144.2	STAT3	3007	3017	-	11.3673	5.72e-05	0.465	GTTCTGGAAAT	MA0513.1	SMAD2::SMAD3::SMAD4	1298	1310	+	14.0984	8.96e-06	0.142	atggctcacacct	1697	None
ABCD1	NM_000033.3::chrX:152985322-152990522(+)	MA0144.2	STAT3	3007	3017	-	11.3673	5.72e-05	0.465	GTTCTGGAAAT	MA0513.1	SMAD2::SMAD3::SMAD4	1686	1698	-	10.7705	6.86e-05	0.307	GTGGCTTACACCT	1309	None
ABCD1	NM_000033.3::chrX:152985322-152990522(+)	MA0144.2	STAT3	3007	3017	-	11.3673	5.72e-05	0.465	GTTCTGGAAAT	MA0513.1	SMAD2::SMAD3::SMAD4	891	903	+	11.1311	5.66e-05	0.296	TGGTCTGTCTCCT	2104	None
ABCD1	NM_000033.3::chrX:152985322-152990522(+)	MA0144.2	STAT3	3418	3428	-	13.2245	2.11e-05	0.402	CTGCCAGGAAA	MA0513.1	SMAD2::SMAD3::SMAD4	4323	4335	+	11.3607	4.97e-05	0.284	CTGCCTCTCACAC	895	None
ABCD1	NM_000033.3::chrX:152985322-152990522(+)	MA0144.2	STAT3	3418	3428	-	13.2245	2.11e-05	0.402	CTGCCAGGAAA	MA0513.1	SMAD2::SMAD3::SMAD4	1298	1310	+	14.0984	8.96e-06	0.142	atggctcacacct	2108	None
ABCD1	NM_000033.3::chrX:152985322-152990522(+)	MA0144.2	STAT3	3418	3428	-	13.2245	2.11e-05	0.402	CTGCCAGGAAA	MA0513.1	SMAD2::SMAD3::SMAD4	1686	1698	-	10.7705	6.86e-05	0.307	GTGGCTTACACCT	1720	None
ABCD1	NM_000033.3::chrX:152985322-152990522(+)	MA0144.2	STAT3	3418	3428	-	13.2245	2.11e-05	0.402	CTGCCAGGAAA	MA0513.1	SMAD2::SMAD3::SMAD4	891	903	+	11.1311	5.66e-05	0.296	TGGTCTGTCTCCT	2515	None
ALDOA	NM_000034.3::chr16:30059410-30064610(+)	MA0144.2	STAT3	1328	1338	+	13.6735	1.62e-05	0.395	CTTCTGGGAAC	MA0513.1	SMAD2::SMAD3::SMAD4	3589	3601	-	13.2459	1.63e-05	0.198	ATGTCTGGCTCCA	2251	None
ALDOA	NM_000034.3::chr16:30059410-30064610(+)	MA0144.2	STAT3	1328	1338	+	13.6735	1.62e-05	0.395	CTTCTGGGAAC	MA0513.1	SMAD2::SMAD3::SMAD4	712	724	+	18.8852	7.56e-08	0.129	ctgtctgtcaccc	604	None
ALDOA	NM_000034.3::chr16:30059410-30064610(+)	MA0144.2	STAT3	1328	1338	+	13.6735	1.62e-05	0.395	CTTCTGGGAAC	MA0513.1	SMAD2::SMAD3::SMAD4	3174	3186	+	14.3934	7.35e-06	0.129	gtggctcacacct	1836	None
ALDOA	NM_000034.3::chr16:30059410-30064610(+)	MA0144.2	STAT3	3783	3793	-	11.0408	6.86e-05	0.474	CTGCCTGGAAC	MA0513.1	SMAD2::SMAD3::SMAD4	3589	3601	-	13.2459	1.63e-05	0.198	ATGTCTGGCTCCA	182	None
ALDOA	NM_000034.3::chr16:30059410-30064610(+)	MA0144.2	STAT3	3783	3793	-	11.0408	6.86e-05	0.474	CTGCCTGGAAC	MA0513.1	SMAD2::SMAD3::SMAD4	712	724	+	18.8852	7.56e-08	0.129	ctgtctgtcaccc	3059	None
ALDOA	NM_000034.3::chr16:30059410-30064610(+)	MA0144.2	STAT3	3783	3793	-	11.0408	6.86e-05	0.474	CTGCCTGGAAC	MA0513.1	SMAD2::SMAD3::SMAD4	3174	3186	+	14.3934	7.35e-06	0.129	gtggctcacacct	597	None
ALDOB	NM_000035.3::chr9:104197863-104203061(-)	MA0144.2	STAT3	2813	2823	+	11.4082	5.52e-05	0.46	CTGCTGAGAAG	MA0513.1	SMAD2::SMAD3::SMAD4	1415	1427	+	12.8525	2.08e-05	0.224	cagtcTGACAGAT	1386	None
ALDOB	NM_000035.3::chr9:104197863-104203061(-)	MA0144.2	STAT3	5171	5181	+	11.1837	6.26e-05	0.474	TTTTCGGGAAA	MA0513.1	SMAD2::SMAD3::SMAD4	1415	1427	+	12.8525	2.08e-05	0.224	cagtcTGACAGAT	3744	None
ALDOB	NM_000035.3::chr9:104197863-104203061(-)	MA0144.2	STAT3	3556	3566	-	11.449	5.41e-05	0.46	TTTCCTGAAAA	MA0513.1	SMAD2::SMAD3::SMAD4	1415	1427	+	12.8525	2.08e-05	0.224	cagtcTGACAGAT	2129	None
AMPD1	NM_000036.2;NM_001172626.1::chr1:115238040-115243238(-)	MA0144.2	STAT3	1336	1346	-	10.8163	7.88e-05	0.484	CTTCAAGGAAA	MA0513.1	SMAD2::SMAD3::SMAD4	757	769	-	12.1311	3.27e-05	0.257	GTGCCTGGCTCCT	567	None
AMPD1	NM_000036.2;NM_001172626.1::chr1:115238040-115243238(-)	MA0144.2	STAT3	1336	1346	-	10.8163	7.88e-05	0.484	CTTCAAGGAAA	MA0513.1	SMAD2::SMAD3::SMAD4	706	718	-	10.2295	8.93e-05	0.324	AGGTCTCTCTCCT	618	None
AMPD1	NM_000036.2;NM_001172626.1::chr1:115238040-115243238(-)	MA0144.2	STAT3	1336	1346	-	10.8163	7.88e-05	0.484	CTTCAAGGAAA	MA0513.1	SMAD2::SMAD3::SMAD4	677	689	-	10.082	9.62e-05	0.329	GGGGCTCCCACCT	647	None
AMPD1	NM_000036.2;NM_001172626.1::chr1:115238040-115243238(-)	MA0144.2	STAT3	1336	1346	-	10.8163	7.88e-05	0.484	CTTCAAGGAAA	MA0513.1	SMAD2::SMAD3::SMAD4	5068	5080	-	10.541	7.69e-05	0.307	CTGACTGACACTA	3722	None
AMPD1	NM_000036.2;NM_001172626.1::chr1:115238040-115243238(-)	MA0144.2	STAT3	3559	3569	+	11.0612	6.79e-05	0.474	ctgttgggaaa	MA0513.1	SMAD2::SMAD3::SMAD4	757	769	-	12.1311	3.27e-05	0.257	GTGCCTGGCTCCT	2790	None
AMPD1	NM_000036.2;NM_001172626.1::chr1:115238040-115243238(-)	MA0144.2	STAT3	3559	3569	+	11.0612	6.79e-05	0.474	ctgttgggaaa	MA0513.1	SMAD2::SMAD3::SMAD4	706	718	-	10.2295	8.93e-05	0.324	AGGTCTCTCTCCT	2841	None
AMPD1	NM_000036.2;NM_001172626.1::chr1:115238040-115243238(-)	MA0144.2	STAT3	3559	3569	+	11.0612	6.79e-05	0.474	ctgttgggaaa	MA0513.1	SMAD2::SMAD3::SMAD4	677	689	-	10.082	9.62e-05	0.329	GGGGCTCCCACCT	2870	None
AMPD1	NM_000036.2;NM_001172626.1::chr1:115238040-115243238(-)	MA0144.2	STAT3	3559	3569	+	11.0612	6.79e-05	0.474	ctgttgggaaa	MA0513.1	SMAD2::SMAD3::SMAD4	5068	5080	-	10.541	7.69e-05	0.307	CTGACTGACACTA	1499	None
AMPD1	NM_000036.2;NM_001172626.1::chr1:115238040-115243238(-)	MA0144.2	STAT3	3181	3191	-	10.8776	7.56e-05	0.481	CTGCCTGAAAA	MA0513.1	SMAD2::SMAD3::SMAD4	757	769	-	12.1311	3.27e-05	0.257	GTGCCTGGCTCCT	2412	None
AMPD1	NM_000036.2;NM_001172626.1::chr1:115238040-115243238(-)	MA0144.2	STAT3	3181	3191	-	10.8776	7.56e-05	0.481	CTGCCTGAAAA	MA0513.1	SMAD2::SMAD3::SMAD4	706	718	-	10.2295	8.93e-05	0.324	AGGTCTCTCTCCT	2463	None
AMPD1	NM_000036.2;NM_001172626.1::chr1:115238040-115243238(-)	MA0144.2	STAT3	3181	3191	-	10.8776	7.56e-05	0.481	CTGCCTGAAAA	MA0513.1	SMAD2::SMAD3::SMAD4	677	689	-	10.082	9.62e-05	0.329	GGGGCTCCCACCT	2492	None
AMPD1	NM_000036.2;NM_001172626.1::chr1:115238040-115243238(-)	MA0144.2	STAT3	3181	3191	-	10.8776	7.56e-05	0.481	CTGCCTGAAAA	MA0513.1	SMAD2::SMAD3::SMAD4	5068	5080	-	10.541	7.69e-05	0.307	CTGACTGACACTA	1877	None
APOA1	NM_000039.2;NM_001318021.1::chr11:116708467-116713665(-)	MA0144.2	STAT3	3413	3423	+	11.6531	4.78e-05	0.455	ctgcagggaaa	MA0513.1	SMAD2::SMAD3::SMAD4	1922	1934	-	12.082	3.36e-05	0.259	AGGTCTGGCACAT	1479	None
APOA1	NM_000039.2;NM_001318021.1::chr11:116708467-116713665(-)	MA0144.2	STAT3	1585	1595	-	14.4898	8.55e-06	0.376	CTGCTTGGAAA	MA0513.1	SMAD2::SMAD3::SMAD4	1922	1934	-	12.082	3.36e-05	0.259	AGGTCTGGCACAT	327	None
APOA1	NM_000039.2;NM_001318021.1::chr11:116708467-116713665(-)	MA0144.2	STAT3	416	426	-	11.6122	5.01e-05	0.458	ATGCCTGGAAA	MA0513.1	SMAD2::SMAD3::SMAD4	1922	1934	-	12.082	3.36e-05	0.259	AGGTCTGGCACAT	1496	None
APOC3	NM_000040.1::chr11:116695623-116700823(+)	MA0144.2	STAT3	907	917	-	10.5102	9.51e-05	0.495	CTTCTGGAAAC	MA0513.1	SMAD2::SMAD3::SMAD4	4733	4745	-	11.7213	4.09e-05	0.273	CTGACTGGCTCCC	3816	None
APOC3	NM_000040.1::chr11:116695623-116700823(+)	MA0144.2	STAT3	907	917	-	10.5102	9.51e-05	0.495	CTTCTGGAAAC	MA0513.1	SMAD2::SMAD3::SMAD4	1249	1261	+	15.918	2.15e-06	0.129	atgtctggcacat	332	None
APOC3	NM_000040.1::chr11:116695623-116700823(+)	MA0144.2	STAT3	907	917	-	10.5102	9.51e-05	0.495	CTTCTGGAAAC	MA0513.1	SMAD2::SMAD3::SMAD4	4992	5004	+	10.7869	6.78e-05	0.307	CTGCCTGTCTGCT	4075	None
APOC3	NM_000040.1::chr11:116695623-116700823(+)	MA0144.2	STAT3	1855	1865	+	10.8163	7.88e-05	0.484	CTGATGGGAAG	MA0513.1	SMAD2::SMAD3::SMAD4	4733	4745	-	11.7213	4.09e-05	0.273	CTGACTGGCTCCC	2868	None
APOC3	NM_000040.1::chr11:116695623-116700823(+)	MA0144.2	STAT3	1855	1865	+	10.8163	7.88e-05	0.484	CTGATGGGAAG	MA0513.1	SMAD2::SMAD3::SMAD4	1249	1261	+	15.918	2.15e-06	0.129	atgtctggcacat	594	None
APOC3	NM_000040.1::chr11:116695623-116700823(+)	MA0144.2	STAT3	1855	1865	+	10.8163	7.88e-05	0.484	CTGATGGGAAG	MA0513.1	SMAD2::SMAD3::SMAD4	4992	5004	+	10.7869	6.78e-05	0.307	CTGCCTGTCTGCT	3127	None
APOE	NM_000041.3;NM_001302691.1;NM_001302688.1::chr19:45404005-45409205(+)	MA0144.2	STAT3	1029	1039	+	12.0612	3.9e-05	0.441	ATGCTTGGAAA	MA0513.1	SMAD2::SMAD3::SMAD4	4363	4375	+	11.0164	6.03e-05	0.302	cagtctccctctt	3324	Yes
APOE	NM_000041.3;NM_001302691.1;NM_001302688.1::chr19:45404005-45409205(+)	MA0144.2	STAT3	1029	1039	+	12.0612	3.9e-05	0.441	ATGCTTGGAAA	MA0513.1	SMAD2::SMAD3::SMAD4	4145	4157	-	10.2295	8.93e-05	0.324	CTGGCTGCCACAG	3106	Yes
APOE	NM_000041.3;NM_001302691.1;NM_001302688.1::chr19:45404005-45409205(+)	MA0144.2	STAT3	1029	1039	+	12.0612	3.9e-05	0.441	ATGCTTGGAAA	MA0513.1	SMAD2::SMAD3::SMAD4	1724	1736	-	14.3934	7.35e-06	0.129	GTGGCTCACACCT	685	Yes
APOE	NM_000041.3;NM_001302691.1;NM_001302688.1::chr19:45404005-45409205(+)	MA0144.2	STAT3	1029	1039	+	12.0612	3.9e-05	0.441	ATGCTTGGAAA	MA0513.1	SMAD2::SMAD3::SMAD4	3543	3555	+	11.6885	4.16e-05	0.273	CTGTCTGCCCCCA	2504	Yes
APOE	NM_000041.3;NM_001302691.1;NM_001302688.1::chr19:45404005-45409205(+)	MA0144.2	STAT3	1029	1039	+	12.0612	3.9e-05	0.441	ATGCTTGGAAA	MA0513.1	SMAD2::SMAD3::SMAD4	2253	2265	+	10.6557	7.26e-05	0.307	ACGCCTCTCACCT	1214	Yes
APOE	NM_000041.3;NM_001302691.1;NM_001302688.1::chr19:45404005-45409205(+)	MA0144.2	STAT3	1029	1039	+	12.0612	3.9e-05	0.441	ATGCTTGGAAA	MA0513.1	SMAD2::SMAD3::SMAD4	1317	1329	-	10.5246	7.74e-05	0.307	CACTCTGTCACCC	278	Yes
APOE	NM_000041.3;NM_001302691.1;NM_001302688.1::chr19:45404005-45409205(+)	MA0144.2	STAT3	1029	1039	+	12.0612	3.9e-05	0.441	ATGCTTGGAAA	MA0513.1	SMAD2::SMAD3::SMAD4	2102	2114	-	11.1148	5.71e-05	0.297	ATGGCTCACTCCT	1063	Yes
APOE	NM_000041.3;NM_001302691.1;NM_001302688.1::chr19:45404005-45409205(+)	MA0144.2	STAT3	2271	2281	-	11.4286	5.43e-05	0.46	CTGCAGGGAAG	MA0513.1	SMAD2::SMAD3::SMAD4	4363	4375	+	11.0164	6.03e-05	0.302	cagtctccctctt	2082	Yes
APOE	NM_000041.3;NM_001302691.1;NM_001302688.1::chr19:45404005-45409205(+)	MA0144.2	STAT3	2271	2281	-	11.4286	5.43e-05	0.46	CTGCAGGGAAG	MA0513.1	SMAD2::SMAD3::SMAD4	4145	4157	-	10.2295	8.93e-05	0.324	CTGGCTGCCACAG	1864	Yes
APOE	NM_000041.3;NM_001302691.1;NM_001302688.1::chr19:45404005-45409205(+)	MA0144.2	STAT3	2271	2281	-	11.4286	5.43e-05	0.46	CTGCAGGGAAG	MA0513.1	SMAD2::SMAD3::SMAD4	1724	1736	-	14.3934	7.35e-06	0.129	GTGGCTCACACCT	535	Yes
APOE	NM_000041.3;NM_001302691.1;NM_001302688.1::chr19:45404005-45409205(+)	MA0144.2	STAT3	2271	2281	-	11.4286	5.43e-05	0.46	CTGCAGGGAAG	MA0513.1	SMAD2::SMAD3::SMAD4	3543	3555	+	11.6885	4.16e-05	0.273	CTGTCTGCCCCCA	1262	Yes
APOE	NM_000041.3;NM_001302691.1;NM_001302688.1::chr19:45404005-45409205(+)	MA0144.2	STAT3	2271	2281	-	11.4286	5.43e-05	0.46	CTGCAGGGAAG	MA0513.1	SMAD2::SMAD3::SMAD4	2253	2265	+	10.6557	7.26e-05	0.307	ACGCCTCTCACCT	6	Yes
APOE	NM_000041.3;NM_001302691.1;NM_001302688.1::chr19:45404005-45409205(+)	MA0144.2	STAT3	2271	2281	-	11.4286	5.43e-05	0.46	CTGCAGGGAAG	MA0513.1	SMAD2::SMAD3::SMAD4	1317	1329	-	10.5246	7.74e-05	0.307	CACTCTGTCACCC	942	Yes
APOE	NM_000041.3;NM_001302691.1;NM_001302688.1::chr19:45404005-45409205(+)	MA0144.2	STAT3	2271	2281	-	11.4286	5.43e-05	0.46	CTGCAGGGAAG	MA0513.1	SMAD2::SMAD3::SMAD4	2102	2114	-	11.1148	5.71e-05	0.297	ATGGCTCACTCCT	157	Yes
ARG1	NM_000045.3;NM_001244438.1::chr6:131889343-131894543(+)	MA0144.2	STAT3	976	986	-	11.7755	4.4e-05	0.444	CTTCAGGGAAT	MA0513.1	SMAD2::SMAD3::SMAD4	4592	4604	-	12.6557	2.36e-05	0.236	TCGTCTGTCACAT	3606	None
ARG1	NM_000045.3;NM_001244438.1::chr6:131889343-131894543(+)	MA0144.2	STAT3	976	986	-	11.7755	4.4e-05	0.444	CTTCAGGGAAT	MA0513.1	SMAD2::SMAD3::SMAD4	3342	3354	-	15.4098	3.21e-06	0.129	CTGTCTGTCACTA	2356	None
ARG1	NM_000045.3;NM_001244438.1::chr6:131889343-131894543(+)	MA0144.2	STAT3	976	986	-	11.7755	4.4e-05	0.444	CTTCAGGGAAT	MA0513.1	SMAD2::SMAD3::SMAD4	547	559	+	13.1639	1.72e-05	0.202	CTCTCTGTCACCT	417	None
ARG1	NM_000045.3;NM_001244438.1::chr6:131889343-131894543(+)	MA0144.2	STAT3	1904	1914	-	10.6939	8.31e-05	0.489	CTGCAGGGAAT	MA0513.1	SMAD2::SMAD3::SMAD4	4592	4604	-	12.6557	2.36e-05	0.236	TCGTCTGTCACAT	2678	None
ARG1	NM_000045.3;NM_001244438.1::chr6:131889343-131894543(+)	MA0144.2	STAT3	1904	1914	-	10.6939	8.31e-05	0.489	CTGCAGGGAAT	MA0513.1	SMAD2::SMAD3::SMAD4	3342	3354	-	15.4098	3.21e-06	0.129	CTGTCTGTCACTA	1428	None
ARG1	NM_000045.3;NM_001244438.1::chr6:131889343-131894543(+)	MA0144.2	STAT3	1904	1914	-	10.6939	8.31e-05	0.489	CTGCAGGGAAT	MA0513.1	SMAD2::SMAD3::SMAD4	547	559	+	13.1639	1.72e-05	0.202	CTCTCTGTCACCT	1345	None
ARG1	NM_000045.3;NM_001244438.1::chr6:131889343-131894543(+)	MA0144.2	STAT3	5161	5171	+	11.7347	4.6e-05	0.451	ATTCCTGGAAT	MA0513.1	SMAD2::SMAD3::SMAD4	4592	4604	-	12.6557	2.36e-05	0.236	TCGTCTGTCACAT	557	None
ARG1	NM_000045.3;NM_001244438.1::chr6:131889343-131894543(+)	MA0144.2	STAT3	5161	5171	+	11.7347	4.6e-05	0.451	ATTCCTGGAAT	MA0513.1	SMAD2::SMAD3::SMAD4	3342	3354	-	15.4098	3.21e-06	0.129	CTGTCTGTCACTA	1807	None
ARG1	NM_000045.3;NM_001244438.1::chr6:131889343-131894543(+)	MA0144.2	STAT3	5161	5171	+	11.7347	4.6e-05	0.451	ATTCCTGGAAT	MA0513.1	SMAD2::SMAD3::SMAD4	547	559	+	13.1639	1.72e-05	0.202	CTCTCTGTCACCT	4602	None
ARG1	NM_000045.3;NM_001244438.1::chr6:131889343-131894543(+)	MA0144.2	STAT3	5161	5171	-	10.9184	7.44e-05	0.481	ATTCCAGGAAT	MA0513.1	SMAD2::SMAD3::SMAD4	4592	4604	-	12.6557	2.36e-05	0.236	TCGTCTGTCACAT	557	None
ARG1	NM_000045.3;NM_001244438.1::chr6:131889343-131894543(+)	MA0144.2	STAT3	5161	5171	-	10.9184	7.44e-05	0.481	ATTCCAGGAAT	MA0513.1	SMAD2::SMAD3::SMAD4	3342	3354	-	15.4098	3.21e-06	0.129	CTGTCTGTCACTA	1807	None
ARG1	NM_000045.3;NM_001244438.1::chr6:131889343-131894543(+)	MA0144.2	STAT3	5161	5171	-	10.9184	7.44e-05	0.481	ATTCCAGGAAT	MA0513.1	SMAD2::SMAD3::SMAD4	547	559	+	13.1639	1.72e-05	0.202	CTCTCTGTCACCT	4602	None
ARG1	NM_000045.3;NM_001244438.1::chr6:131889343-131894543(+)	MA0144.2	STAT3	4120	4130	-	12.9388	2.49e-05	0.407	ATGCTGGGAAG	MA0513.1	SMAD2::SMAD3::SMAD4	4592	4604	-	12.6557	2.36e-05	0.236	TCGTCTGTCACAT	462	None
ARG1	NM_000045.3;NM_001244438.1::chr6:131889343-131894543(+)	MA0144.2	STAT3	4120	4130	-	12.9388	2.49e-05	0.407	ATGCTGGGAAG	MA0513.1	SMAD2::SMAD3::SMAD4	3342	3354	-	15.4098	3.21e-06	0.129	CTGTCTGTCACTA	766	None
ARG1	NM_000045.3;NM_001244438.1::chr6:131889343-131894543(+)	MA0144.2	STAT3	4120	4130	-	12.9388	2.49e-05	0.407	ATGCTGGGAAG	MA0513.1	SMAD2::SMAD3::SMAD4	547	559	+	13.1639	1.72e-05	0.202	CTCTCTGTCACCT	3561	None
ARSB	NM_000046.3::chr5:78282158-78287356(-)	MA0144.2	STAT3	38	48	-	12.6122	2.89e-05	0.417	GTTCTAGGAAT	MA0513.1	SMAD2::SMAD3::SMAD4	3486	3498	+	10.7705	6.86e-05	0.307	gtggcttacacct	3438	None
ARSB	NM_000046.3::chr5:78282158-78287356(-)	MA0144.2	STAT3	38	48	-	12.6122	2.89e-05	0.417	GTTCTAGGAAT	MA0513.1	SMAD2::SMAD3::SMAD4	889	901	+	14.3934	7.35e-06	0.129	gtggctcacacct	841	None
ASL	NM_000048.3::chr7:65535775-65540975(+)	MA0144.2	STAT3	281	291	-	12.0612	3.9e-05	0.441	ATGCTTGGAAA	MA0513.1	SMAD2::SMAD3::SMAD4	454	466	-	10.2295	8.93e-05	0.324	CAGGCTGCCAGTT	163	None
ASL	NM_000048.3::chr7:65535775-65540975(+)	MA0144.2	STAT3	281	291	-	12.0612	3.9e-05	0.441	ATGCTTGGAAA	MA0513.1	SMAD2::SMAD3::SMAD4	4518	4530	-	11.9344	3.64e-05	0.269	GTGGCTCACAGCT	4227	None
ASL	NM_000048.3::chr7:65535775-65540975(+)	MA0144.2	STAT3	281	291	-	12.0612	3.9e-05	0.441	ATGCTTGGAAA	MA0513.1	SMAD2::SMAD3::SMAD4	1525	1537	-	14.3934	7.35e-06	0.129	GTGGCTCACACCT	1234	None
ASL	NM_000048.3::chr7:65535775-65540975(+)	MA0144.2	STAT3	281	291	-	12.0612	3.9e-05	0.441	ATGCTTGGAAA	MA0513.1	SMAD2::SMAD3::SMAD4	4271	4283	-	11.2295	5.35e-05	0.291	CAGCCTGACTCCT	3980	None
ASL	NM_000048.3::chr7:65535775-65540975(+)	MA0144.2	STAT3	281	291	-	12.0612	3.9e-05	0.441	ATGCTTGGAAA	MA0513.1	SMAD2::SMAD3::SMAD4	1025	1037	+	12.1148	3.29e-05	0.257	CTGTCTTTCTCCT	734	None
ASL	NM_000048.3::chr7:65535775-65540975(+)	MA0144.2	STAT3	281	291	-	12.0612	3.9e-05	0.441	ATGCTTGGAAA	MA0513.1	SMAD2::SMAD3::SMAD4	1614	1626	+	12.3607	2.85e-05	0.248	GAGCCTGCCACCT	1323	None
ASL	NM_000048.3::chr7:65535775-65540975(+)	MA0144.2	STAT3	3292	3302	+	13.0816	2.29e-05	0.403	ctgcctggaat	MA0513.1	SMAD2::SMAD3::SMAD4	454	466	-	10.2295	8.93e-05	0.324	CAGGCTGCCAGTT	2826	None
ASL	NM_000048.3::chr7:65535775-65540975(+)	MA0144.2	STAT3	3292	3302	+	13.0816	2.29e-05	0.403	ctgcctggaat	MA0513.1	SMAD2::SMAD3::SMAD4	4518	4530	-	11.9344	3.64e-05	0.269	GTGGCTCACAGCT	1216	None
ASL	NM_000048.3::chr7:65535775-65540975(+)	MA0144.2	STAT3	3292	3302	+	13.0816	2.29e-05	0.403	ctgcctggaat	MA0513.1	SMAD2::SMAD3::SMAD4	1525	1537	-	14.3934	7.35e-06	0.129	GTGGCTCACACCT	1755	None
ASL	NM_000048.3::chr7:65535775-65540975(+)	MA0144.2	STAT3	3292	3302	+	13.0816	2.29e-05	0.403	ctgcctggaat	MA0513.1	SMAD2::SMAD3::SMAD4	4271	4283	-	11.2295	5.35e-05	0.291	CAGCCTGACTCCT	969	None
ASL	NM_000048.3::chr7:65535775-65540975(+)	MA0144.2	STAT3	3292	3302	+	13.0816	2.29e-05	0.403	ctgcctggaat	MA0513.1	SMAD2::SMAD3::SMAD4	1025	1037	+	12.1148	3.29e-05	0.257	CTGTCTTTCTCCT	2255	None
ASL	NM_000048.3::chr7:65535775-65540975(+)	MA0144.2	STAT3	3292	3302	+	13.0816	2.29e-05	0.403	ctgcctggaat	MA0513.1	SMAD2::SMAD3::SMAD4	1614	1626	+	12.3607	2.85e-05	0.248	GAGCCTGCCACCT	1666	None
ASL	NM_000048.3::chr7:65535775-65540975(+)	MA0144.2	STAT3	2595	2605	+	11.2449	6.11e-05	0.47	attctgggaac	MA0513.1	SMAD2::SMAD3::SMAD4	454	466	-	10.2295	8.93e-05	0.324	CAGGCTGCCAGTT	2129	None
ASL	NM_000048.3::chr7:65535775-65540975(+)	MA0144.2	STAT3	2595	2605	+	11.2449	6.11e-05	0.47	attctgggaac	MA0513.1	SMAD2::SMAD3::SMAD4	4518	4530	-	11.9344	3.64e-05	0.269	GTGGCTCACAGCT	1913	None
ASL	NM_000048.3::chr7:65535775-65540975(+)	MA0144.2	STAT3	2595	2605	+	11.2449	6.11e-05	0.47	attctgggaac	MA0513.1	SMAD2::SMAD3::SMAD4	1525	1537	-	14.3934	7.35e-06	0.129	GTGGCTCACACCT	1058	None
ASL	NM_000048.3::chr7:65535775-65540975(+)	MA0144.2	STAT3	2595	2605	+	11.2449	6.11e-05	0.47	attctgggaac	MA0513.1	SMAD2::SMAD3::SMAD4	4271	4283	-	11.2295	5.35e-05	0.291	CAGCCTGACTCCT	1666	None
ASL	NM_000048.3::chr7:65535775-65540975(+)	MA0144.2	STAT3	2595	2605	+	11.2449	6.11e-05	0.47	attctgggaac	MA0513.1	SMAD2::SMAD3::SMAD4	1025	1037	+	12.1148	3.29e-05	0.257	CTGTCTTTCTCCT	1558	None
ASL	NM_000048.3::chr7:65535775-65540975(+)	MA0144.2	STAT3	2595	2605	+	11.2449	6.11e-05	0.47	attctgggaac	MA0513.1	SMAD2::SMAD3::SMAD4	1614	1626	+	12.3607	2.85e-05	0.248	GAGCCTGCCACCT	969	None
ASPA	NM_000049.2::chr17:3374295-3379495(+)	MA0144.2	STAT3	1417	1427	-	12.4898	3.14e-05	0.42	TTGCCAGGAAG	MA0513.1	SMAD2::SMAD3::SMAD4	1189	1201	+	10.9344	6.29e-05	0.307	GTGTCTGGCTCAA	216	None
ASPA	NM_000049.2::chr17:3374295-3379495(+)	MA0144.2	STAT3	4222	4232	+	11.0816	6.72e-05	0.474	ATTCTGGAAAA	MA0513.1	SMAD2::SMAD3::SMAD4	1189	1201	+	10.9344	6.29e-05	0.307	GTGTCTGGCTCAA	3021	None
ASPA	NM_000049.2::chr17:3374295-3379495(+)	MA0144.2	STAT3	2016	2026	+	12.5102	3.03e-05	0.417	cttcagggaag	MA0513.1	SMAD2::SMAD3::SMAD4	1189	1201	+	10.9344	6.29e-05	0.307	GTGTCTGGCTCAA	815	None
ATM	NM_000051.3::chr11:108088558-108093758(+)	MA0144.2	STAT3	609	619	+	10.6531	8.61e-05	0.494	TTTCCTAGAAA	MA0513.1	SMAD2::SMAD3::SMAD4	3950	3962	+	12.377	2.81e-05	0.246	CCGTCTCTCACAC	3331	None
ATM	NM_000051.3::chr11:108088558-108093758(+)	MA0144.2	STAT3	609	619	+	10.6531	8.61e-05	0.494	TTTCCTAGAAA	MA0513.1	SMAD2::SMAD3::SMAD4	1346	1358	-	10.2295	8.93e-05	0.324	CAGCCTCCCACCA	727	None
ATM	NM_000051.3::chr11:108088558-108093758(+)	MA0144.2	STAT3	609	619	-	14.2449	1.06e-05	0.377	TTTCTAGGAAA	MA0513.1	SMAD2::SMAD3::SMAD4	3950	3962	+	12.377	2.81e-05	0.246	CCGTCTCTCACAC	3331	None
ATM	NM_000051.3::chr11:108088558-108093758(+)	MA0144.2	STAT3	609	619	-	14.2449	1.06e-05	0.377	TTTCTAGGAAA	MA0513.1	SMAD2::SMAD3::SMAD4	1346	1358	-	10.2295	8.93e-05	0.324	CAGCCTCCCACCA	727	None
ATP7B	NM_000053.3;NM_001330578.1;NM_001330579.1;NM_001005918.2;NM_001243182.1::chr13:52585431-52590629(-)	MA0144.2	STAT3	3449	3459	-	11.5918	5.08e-05	0.459	CTTCTAGAAAA	MA0513.1	SMAD2::SMAD3::SMAD4	1099	1111	+	10.5246	7.74e-05	0.307	cactctgtcaccc	2338	Yes
ATP7B	NM_000053.3;NM_001330578.1;NM_001330579.1;NM_001005918.2;NM_001243182.1::chr13:52585431-52590629(-)	MA0144.2	STAT3	287	297	+	10.5306	9.36e-05	0.495	ctgcttagaaa	MA0513.1	SMAD2::SMAD3::SMAD4	1099	1111	+	10.5246	7.74e-05	0.307	cactctgtcaccc	802	Yes
BCHE	NM_000055.3::chr3:165555061-165560259(-)	MA0144.2	STAT3	25	35	-	14.6122	7.81e-06	0.376	TTTCCTGGAAA	MA0513.1	SMAD2::SMAD3::SMAD4	3529	3541	+	10.1803	9.15e-05	0.326	atgtctgacccat	3494	None
BCHE	NM_000055.3::chr3:165555061-165560259(-)	MA0144.2	STAT3	25	35	-	14.6122	7.81e-06	0.376	TTTCCTGGAAA	MA0513.1	SMAD2::SMAD3::SMAD4	3404	3416	+	10.5246	7.74e-05	0.307	cactctgtcaccc	3369	None
BCHE	NM_000055.3::chr3:165555061-165560259(-)	MA0144.2	STAT3	1292	1302	+	14.2449	1.06e-05	0.377	ATTCTGGGAAA	MA0513.1	SMAD2::SMAD3::SMAD4	3529	3541	+	10.1803	9.15e-05	0.326	atgtctgacccat	2227	None
BCHE	NM_000055.3::chr3:165555061-165560259(-)	MA0144.2	STAT3	1292	1302	+	14.2449	1.06e-05	0.377	ATTCTGGGAAA	MA0513.1	SMAD2::SMAD3::SMAD4	3404	3416	+	10.5246	7.74e-05	0.307	cactctgtcaccc	2102	None
BCHE	NM_000055.3::chr3:165555061-165560259(-)	MA0144.2	STAT3	25	35	+	13.7959	1.5e-05	0.389	tttccaggaaa	MA0513.1	SMAD2::SMAD3::SMAD4	3529	3541	+	10.1803	9.15e-05	0.326	atgtctgacccat	3494	None
BCHE	NM_000055.3::chr3:165555061-165560259(-)	MA0144.2	STAT3	25	35	+	13.7959	1.5e-05	0.389	tttccaggaaa	MA0513.1	SMAD2::SMAD3::SMAD4	3404	3416	+	10.5246	7.74e-05	0.307	cactctgtcaccc	3369	None
BCHE	NM_000055.3::chr3:165555061-165560259(-)	MA0144.2	STAT3	4310	4320	-	10.9388	7.34e-05	0.481	TTTCTTGAAAT	MA0513.1	SMAD2::SMAD3::SMAD4	3529	3541	+	10.1803	9.15e-05	0.326	atgtctgacccat	769	None
BCHE	NM_000055.3::chr3:165555061-165560259(-)	MA0144.2	STAT3	4310	4320	-	10.9388	7.34e-05	0.481	TTTCTTGAAAT	MA0513.1	SMAD2::SMAD3::SMAD4	3404	3416	+	10.5246	7.74e-05	0.307	cactctgtcaccc	894	None
BRCA2	NM_000059.3::chr13:32884616-32889816(+)	MA0144.2	STAT3	487	497	-	10.7347	8.19e-05	0.488	GTTTTGGGAAG	MA0513.1	SMAD2::SMAD3::SMAD4	564	576	-	12.6721	2.34e-05	0.235	CAGTCTGGCAACC	67	None
BRCA2	NM_000059.3::chr13:32884616-32889816(+)	MA0144.2	STAT3	487	497	-	10.7347	8.19e-05	0.488	GTTTTGGGAAG	MA0513.1	SMAD2::SMAD3::SMAD4	913	925	+	13.7705	1.14e-05	0.162	CTGCCTGTCAGCT	416	None
BRCA2	NM_000059.3::chr13:32884616-32889816(+)	MA0144.2	STAT3	487	497	-	10.7347	8.19e-05	0.488	GTTTTGGGAAG	MA0513.1	SMAD2::SMAD3::SMAD4	2922	2934	+	10.6721	7.2e-05	0.307	ctgtctcccaggc	2425	None
BRCA2	NM_000059.3::chr13:32884616-32889816(+)	MA0144.2	STAT3	487	497	-	10.7347	8.19e-05	0.488	GTTTTGGGAAG	MA0513.1	SMAD2::SMAD3::SMAD4	2601	2613	-	11.8525	3.81e-05	0.273	CAGTCTCTCTCCA	2104	None
BRCA2	NM_000059.3::chr13:32884616-32889816(+)	MA0144.2	STAT3	487	497	-	10.7347	8.19e-05	0.488	GTTTTGGGAAG	MA0513.1	SMAD2::SMAD3::SMAD4	2128	2140	+	14.3934	7.35e-06	0.129	gtggctcacacct	1631	None
BRCA2	NM_000059.3::chr13:32884616-32889816(+)	MA0144.2	STAT3	4458	4468	-	10.8163	7.88e-05	0.484	TTGCTTGAAAA	MA0513.1	SMAD2::SMAD3::SMAD4	564	576	-	12.6721	2.34e-05	0.235	CAGTCTGGCAACC	3882	None
BRCA2	NM_000059.3::chr13:32884616-32889816(+)	MA0144.2	STAT3	4458	4468	-	10.8163	7.88e-05	0.484	TTGCTTGAAAA	MA0513.1	SMAD2::SMAD3::SMAD4	913	925	+	13.7705	1.14e-05	0.162	CTGCCTGTCAGCT	3533	None
BRCA2	NM_000059.3::chr13:32884616-32889816(+)	MA0144.2	STAT3	4458	4468	-	10.8163	7.88e-05	0.484	TTGCTTGAAAA	MA0513.1	SMAD2::SMAD3::SMAD4	2922	2934	+	10.6721	7.2e-05	0.307	ctgtctcccaggc	1524	None
BRCA2	NM_000059.3::chr13:32884616-32889816(+)	MA0144.2	STAT3	4458	4468	-	10.8163	7.88e-05	0.484	TTGCTTGAAAA	MA0513.1	SMAD2::SMAD3::SMAD4	2601	2613	-	11.8525	3.81e-05	0.273	CAGTCTCTCTCCA	1845	None
BRCA2	NM_000059.3::chr13:32884616-32889816(+)	MA0144.2	STAT3	4458	4468	-	10.8163	7.88e-05	0.484	TTGCTTGAAAA	MA0513.1	SMAD2::SMAD3::SMAD4	2128	2140	+	14.3934	7.35e-06	0.129	gtggctcacacct	2318	None
BRCA2	NM_000059.3::chr13:32884616-32889816(+)	MA0144.2	STAT3	3641	3651	+	10.8163	7.88e-05	0.484	ttgcttgaaaa	MA0513.1	SMAD2::SMAD3::SMAD4	564	576	-	12.6721	2.34e-05	0.235	CAGTCTGGCAACC	3065	None
BRCA2	NM_000059.3::chr13:32884616-32889816(+)	MA0144.2	STAT3	3641	3651	+	10.8163	7.88e-05	0.484	ttgcttgaaaa	MA0513.1	SMAD2::SMAD3::SMAD4	913	925	+	13.7705	1.14e-05	0.162	CTGCCTGTCAGCT	2716	None
BRCA2	NM_000059.3::chr13:32884616-32889816(+)	MA0144.2	STAT3	3641	3651	+	10.8163	7.88e-05	0.484	ttgcttgaaaa	MA0513.1	SMAD2::SMAD3::SMAD4	2922	2934	+	10.6721	7.2e-05	0.307	ctgtctcccaggc	707	None
BRCA2	NM_000059.3::chr13:32884616-32889816(+)	MA0144.2	STAT3	3641	3651	+	10.8163	7.88e-05	0.484	ttgcttgaaaa	MA0513.1	SMAD2::SMAD3::SMAD4	2601	2613	-	11.8525	3.81e-05	0.273	CAGTCTCTCTCCA	1028	None
BRCA2	NM_000059.3::chr13:32884616-32889816(+)	MA0144.2	STAT3	3641	3651	+	10.8163	7.88e-05	0.484	ttgcttgaaaa	MA0513.1	SMAD2::SMAD3::SMAD4	2128	2140	+	14.3934	7.35e-06	0.129	gtggctcacacct	1501	None
BTD	NM_000060.4;NM_001323582.1;NM_001281724.2::chr3:15638251-15643451(+)	MA0144.2	STAT3	4617	4627	-	14.1633	1.14e-05	0.38	CTTCCTGGAAT	MA0513.1	SMAD2::SMAD3::SMAD4	2829	2841	+	14.2459	8.2e-06	0.138	CAGTCTCACAGCT	1776	Yes
BTD	NM_000060.4;NM_001323582.1;NM_001281724.2::chr3:15638251-15643451(+)	MA0144.2	STAT3	4617	4627	-	14.1633	1.14e-05	0.38	CTTCCTGGAAT	MA0513.1	SMAD2::SMAD3::SMAD4	2437	2449	+	13.2787	1.6e-05	0.196	gtgtctgtctcca	2168	Yes
BTD	NM_000060.4;NM_001323582.1;NM_001281724.2::chr3:15638251-15643451(+)	MA0144.2	STAT3	4617	4627	+	11.6531	4.78e-05	0.455	ATTCCAGGAAG	MA0513.1	SMAD2::SMAD3::SMAD4	2829	2841	+	14.2459	8.2e-06	0.138	CAGTCTCACAGCT	1776	Yes
BTD	NM_000060.4;NM_001323582.1;NM_001281724.2::chr3:15638251-15643451(+)	MA0144.2	STAT3	4617	4627	+	11.6531	4.78e-05	0.455	ATTCCAGGAAG	MA0513.1	SMAD2::SMAD3::SMAD4	2437	2449	+	13.2787	1.6e-05	0.196	gtgtctgtctcca	2168	Yes
BTD	NM_000060.4;NM_001323582.1;NM_001281724.2::chr3:15638251-15643451(+)	MA0144.2	STAT3	4891	4901	-	10.8367	7.76e-05	0.483	CTCCCGGGAAG	MA0513.1	SMAD2::SMAD3::SMAD4	2829	2841	+	14.2459	8.2e-06	0.138	CAGTCTCACAGCT	2050	Yes
BTD	NM_000060.4;NM_001323582.1;NM_001281724.2::chr3:15638251-15643451(+)	MA0144.2	STAT3	4891	4901	-	10.8367	7.76e-05	0.483	CTCCCGGGAAG	MA0513.1	SMAD2::SMAD3::SMAD4	2437	2449	+	13.2787	1.6e-05	0.196	gtgtctgtctcca	2442	Yes
BTD	NM_000060.4;NM_001323582.1;NM_001281724.2::chr3:15638251-15643451(+)	MA0144.2	STAT3	233	243	-	13.4286	1.88e-05	0.398	GTTCTTGGAAT	MA0513.1	SMAD2::SMAD3::SMAD4	2829	2841	+	14.2459	8.2e-06	0.138	CAGTCTCACAGCT	2586	Yes
BTD	NM_000060.4;NM_001323582.1;NM_001281724.2::chr3:15638251-15643451(+)	MA0144.2	STAT3	233	243	-	13.4286	1.88e-05	0.398	GTTCTTGGAAT	MA0513.1	SMAD2::SMAD3::SMAD4	2437	2449	+	13.2787	1.6e-05	0.196	gtgtctgtctcca	2194	Yes
SERPING1	NM_000062.2::chr11:57360026-57365226(+)	MA0144.2	STAT3	404	414	+	10.7755	8.12e-05	0.487	TTCCTGGGAAG	MA0513.1	SMAD2::SMAD3::SMAD4	231	243	-	13.1311	1.76e-05	0.205	CAGGCTCACACCC	161	Yes
SERPING1	NM_000062.2::chr11:57360026-57365226(+)	MA0144.2	STAT3	404	414	+	10.7755	8.12e-05	0.487	TTCCTGGGAAG	MA0513.1	SMAD2::SMAD3::SMAD4	983	995	-	10.1803	9.15e-05	0.326	CTGGCTGGCAAAT	569	Yes
SERPING1	NM_000062.2::chr11:57360026-57365226(+)	MA0144.2	STAT3	4785	4795	-	11.0408	6.86e-05	0.474	CTTTTTGGAAA	MA0513.1	SMAD2::SMAD3::SMAD4	231	243	-	13.1311	1.76e-05	0.205	CAGGCTCACACCC	4542	Yes
SERPING1	NM_000062.2::chr11:57360026-57365226(+)	MA0144.2	STAT3	4785	4795	-	11.0408	6.86e-05	0.474	CTTTTTGGAAA	MA0513.1	SMAD2::SMAD3::SMAD4	983	995	-	10.1803	9.15e-05	0.326	CTGGCTGGCAAAT	3790	Yes
SERPING1	NM_000062.2::chr11:57360026-57365226(+)	MA0144.2	STAT3	3309	3319	-	14.2449	1.06e-05	0.377	ATTCTGGGAAA	MA0513.1	SMAD2::SMAD3::SMAD4	231	243	-	13.1311	1.76e-05	0.205	CAGGCTCACACCC	3066	Yes
SERPING1	NM_000062.2::chr11:57360026-57365226(+)	MA0144.2	STAT3	3309	3319	-	14.2449	1.06e-05	0.377	ATTCTGGGAAA	MA0513.1	SMAD2::SMAD3::SMAD4	983	995	-	10.1803	9.15e-05	0.326	CTGGCTGGCAAAT	2314	Yes
[truncated: 65,334 more rows]

## Sheet: STAT3_SMAD_up5k_down200_mouse_
gene_name	promoter_region	motif_id.Stat3	motif_alt_id.Stat3	start.Stat3	stop.Stat3	strand.Stat3	score.Stat3	p.value.Stat3	q.value.Stat3	matched_sequence.Stat3	motif_id.Smad4	motif_alt_id.Smad4	start.Smad4	stop.Smad4	strand.Smad4	score.Smad4	p.value.Smad4	q.value.Smad4	matched_sequence.Smad4	motif_distance	DE_upiCAF_downmyCAF
[truncated: 57,353 more rows]
