# Supplementary figures and images for: IL1-Induced JAK/STAT Signaling Is Antagonized by TGFβ to Shape CAF Heterogeneity in Pancreatic Ductal Adenocarcinoma
Source: Oxford University Press journal article supplement (doi:10.1158/2159-8290.cd-18-0710), 2018-10-26

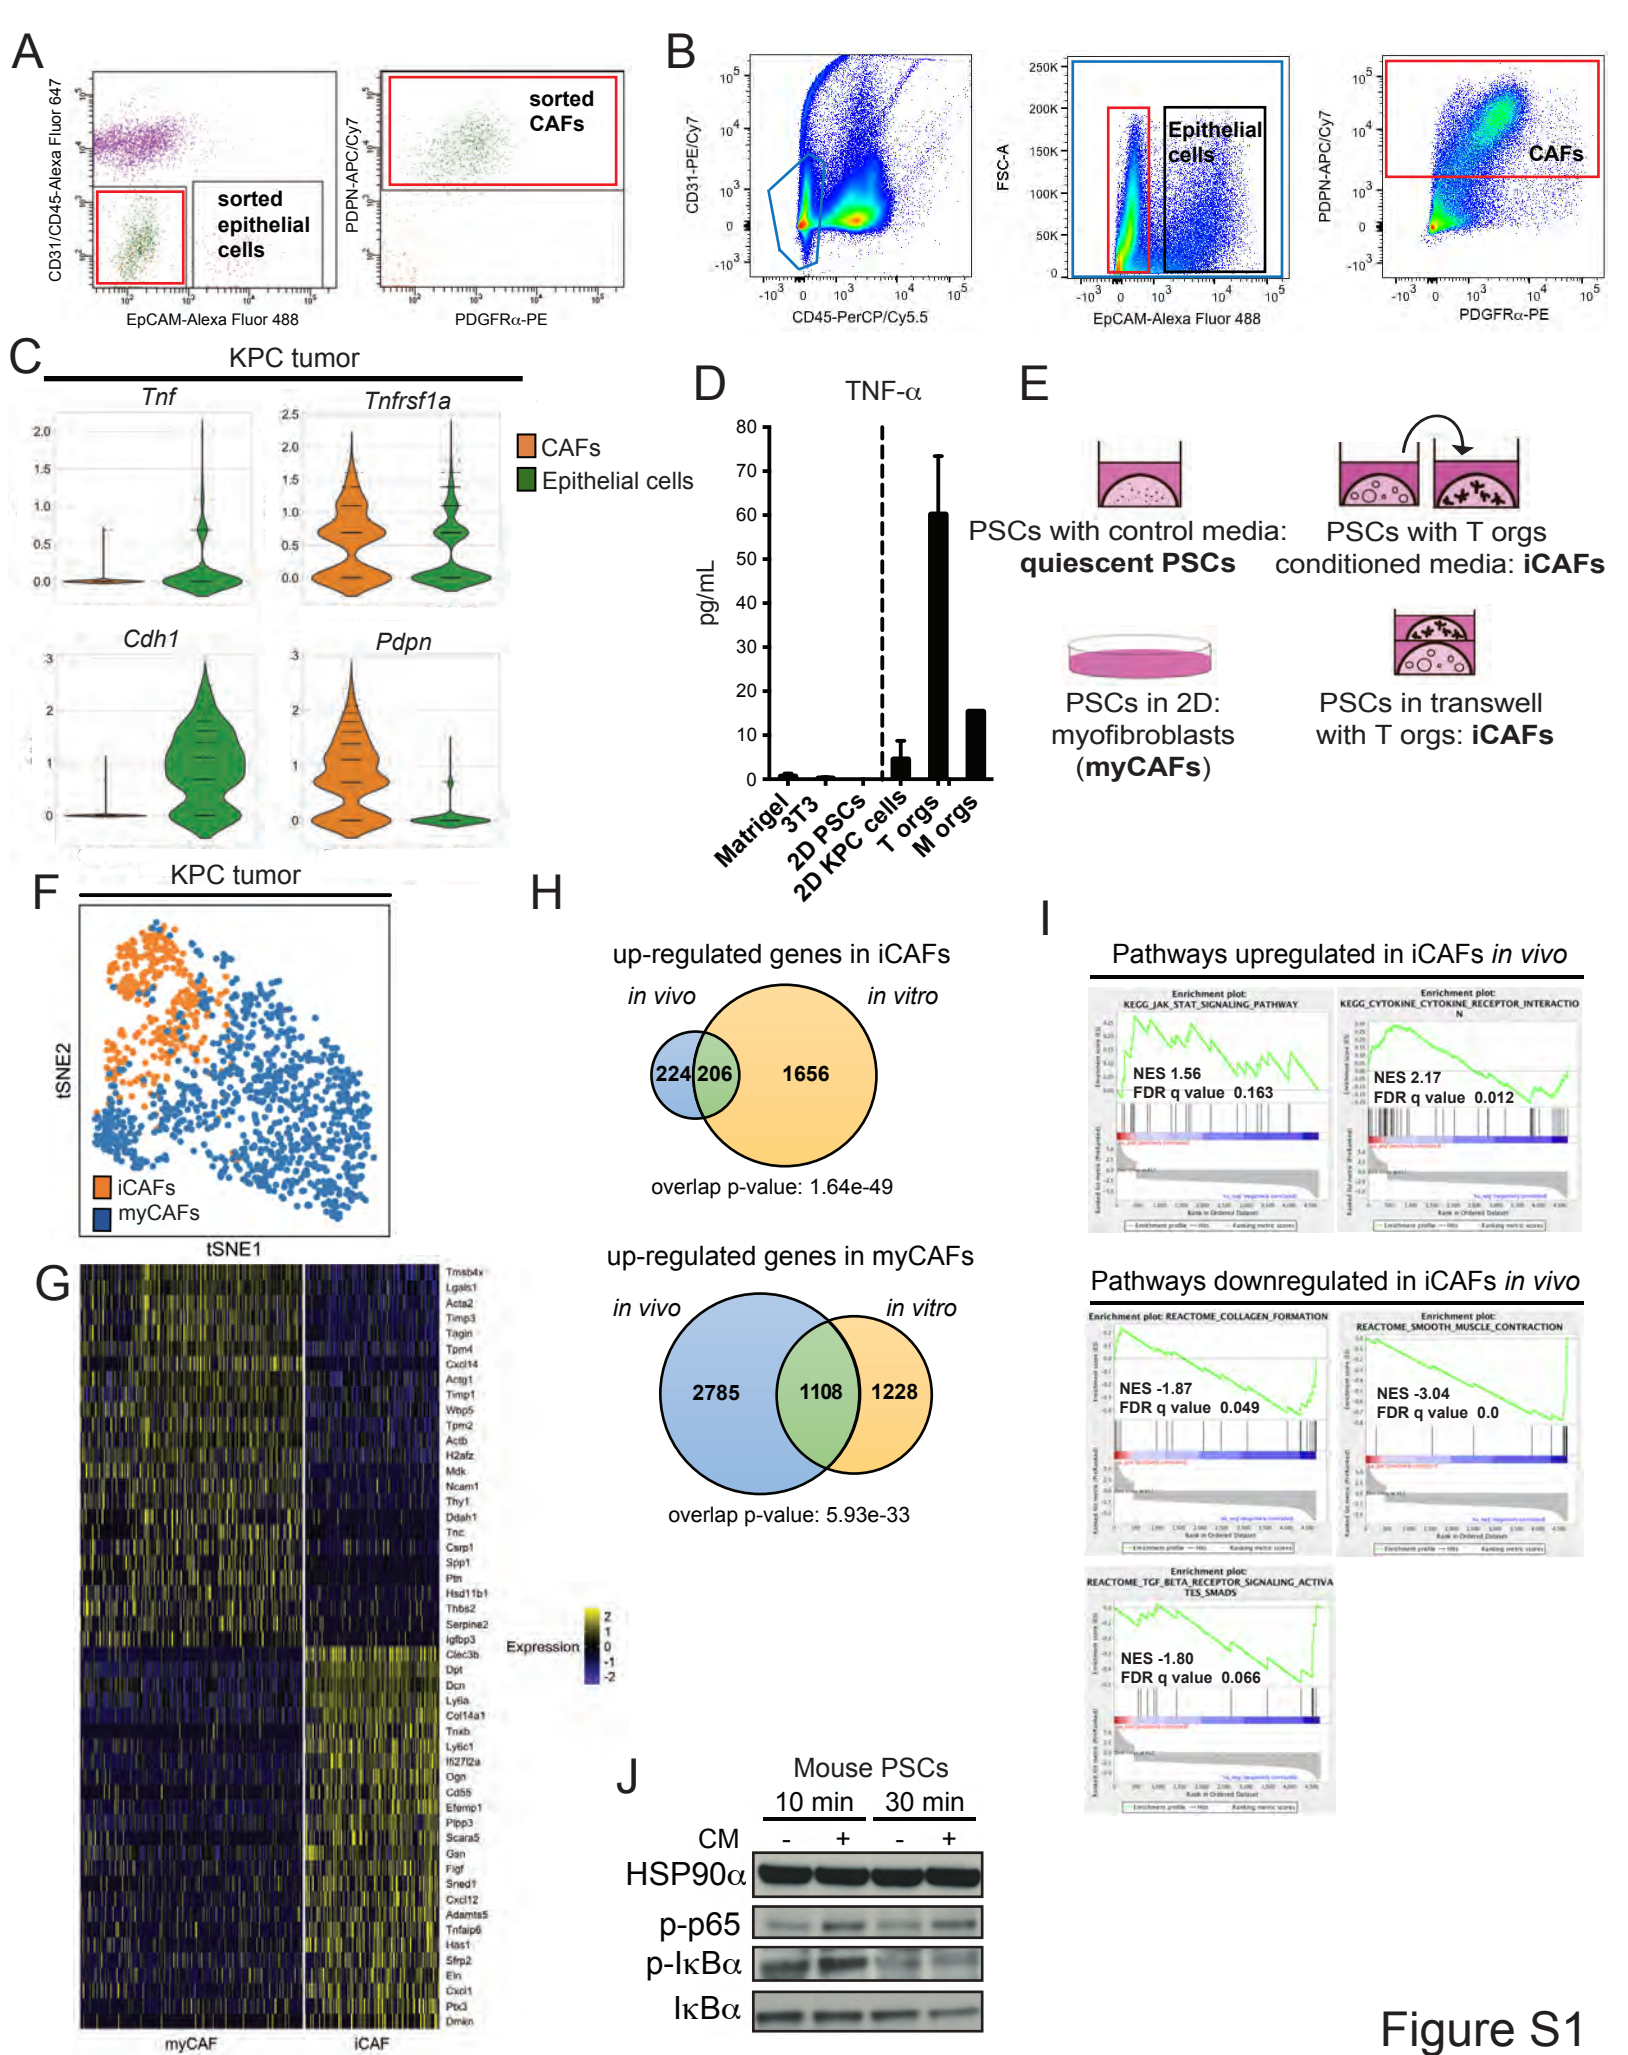

Figure S1

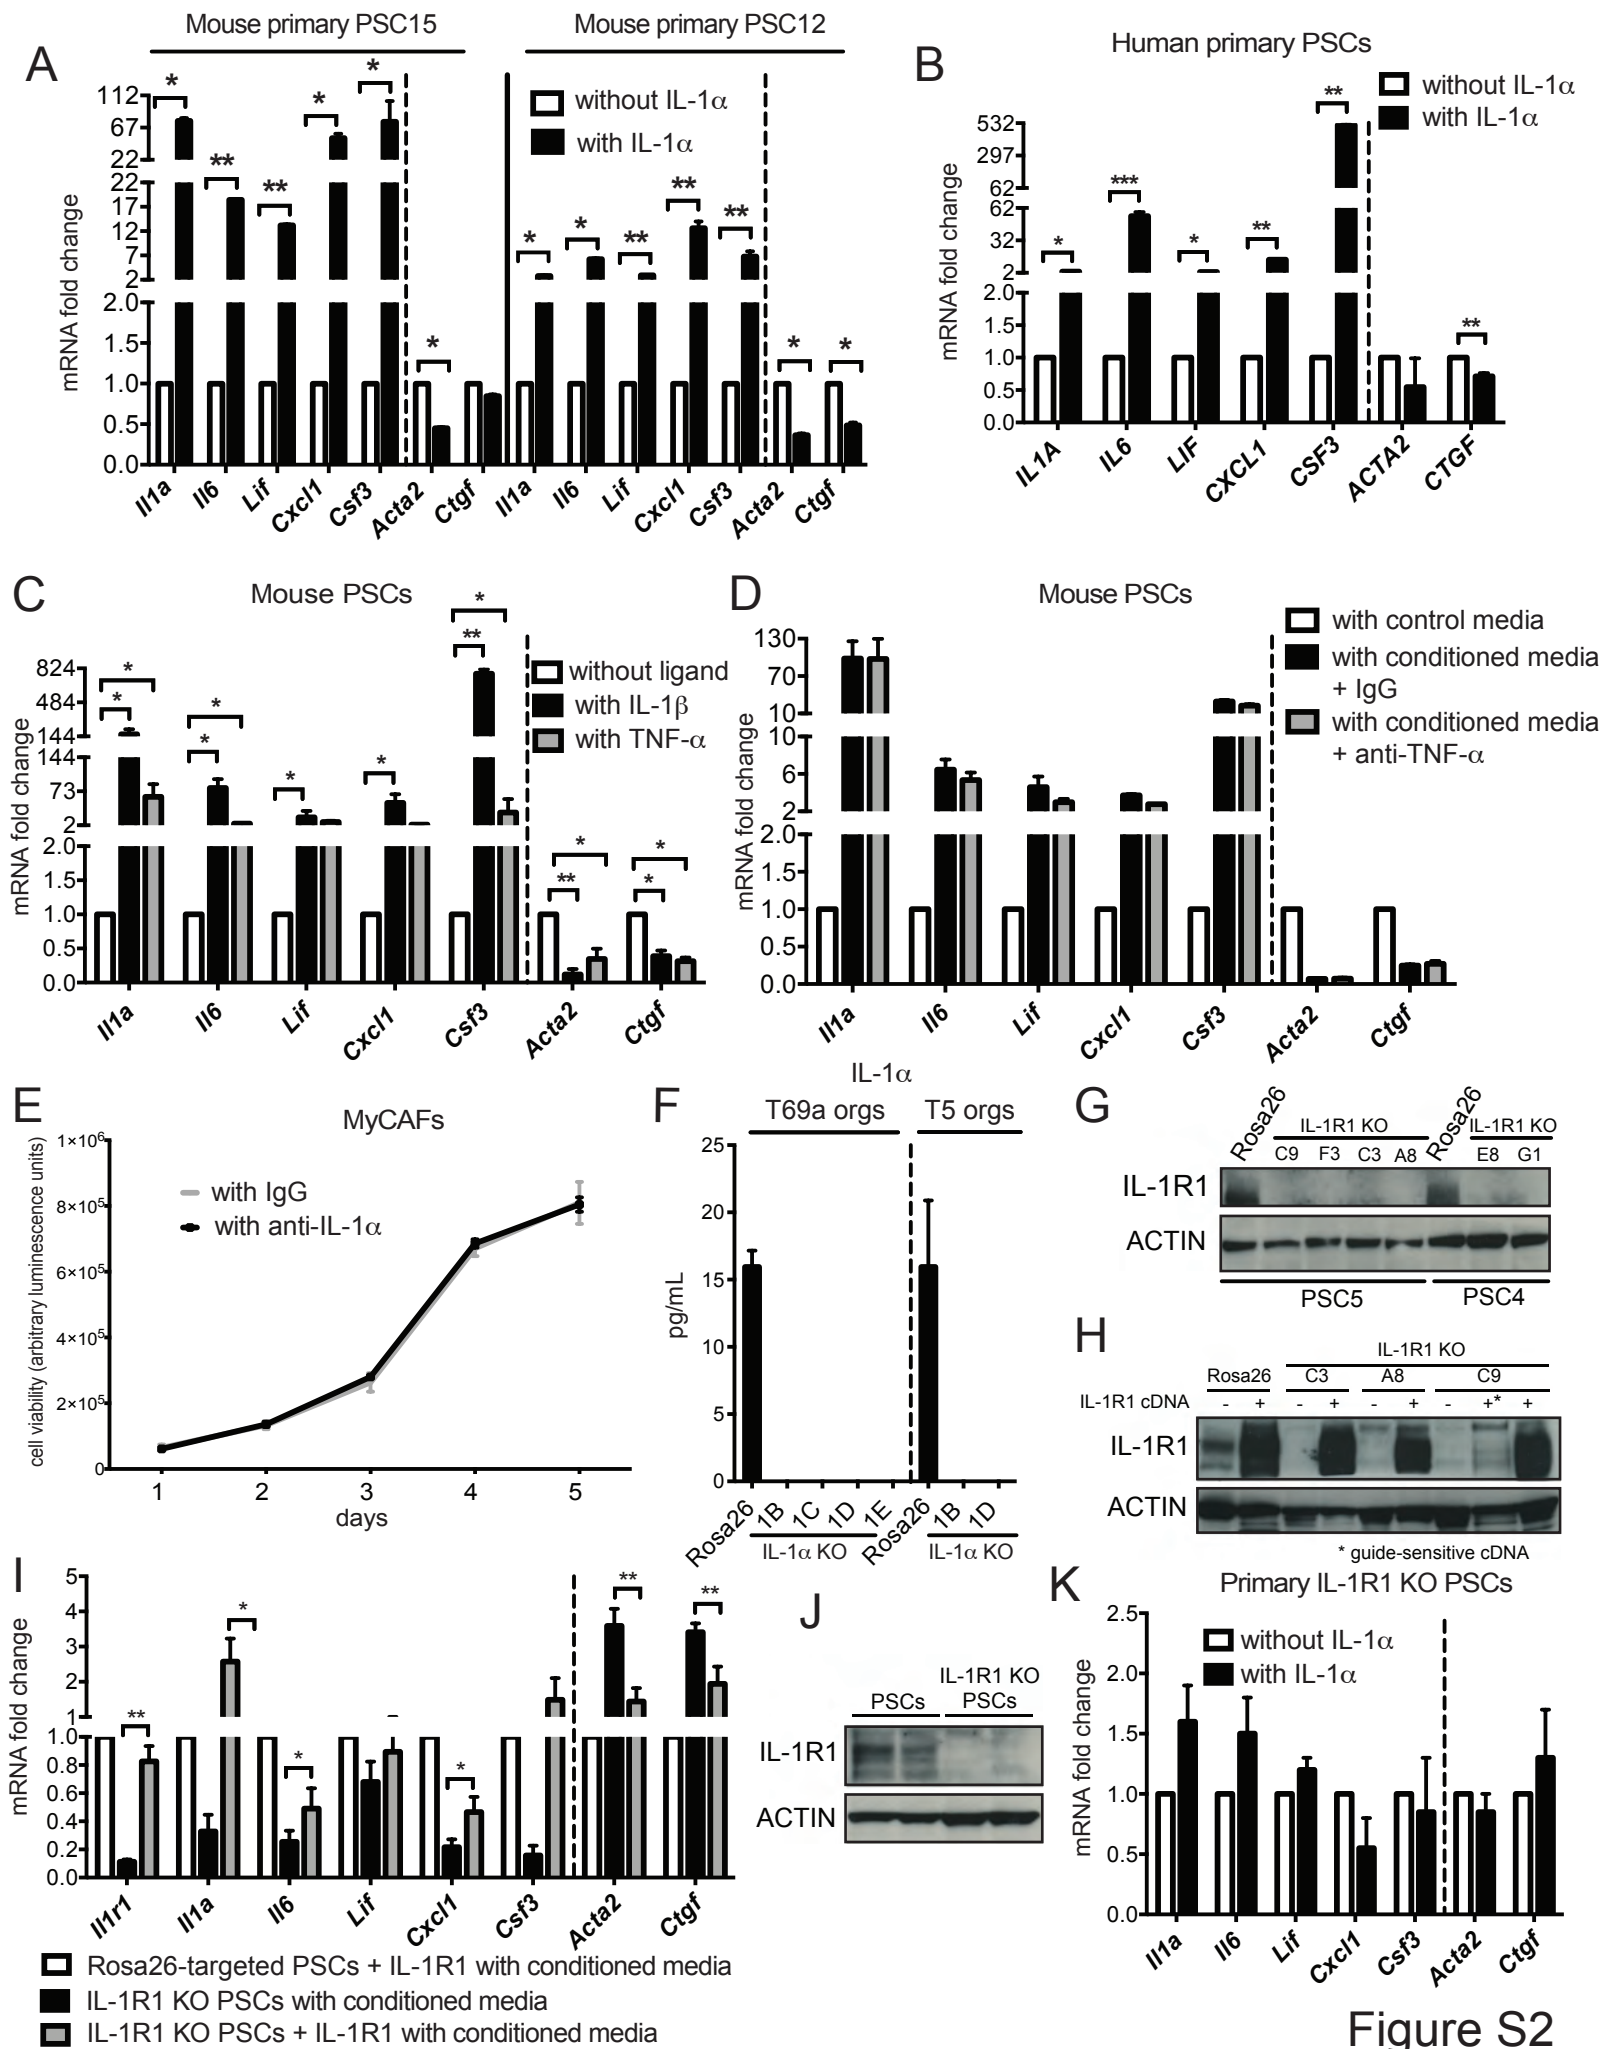

Figure S2



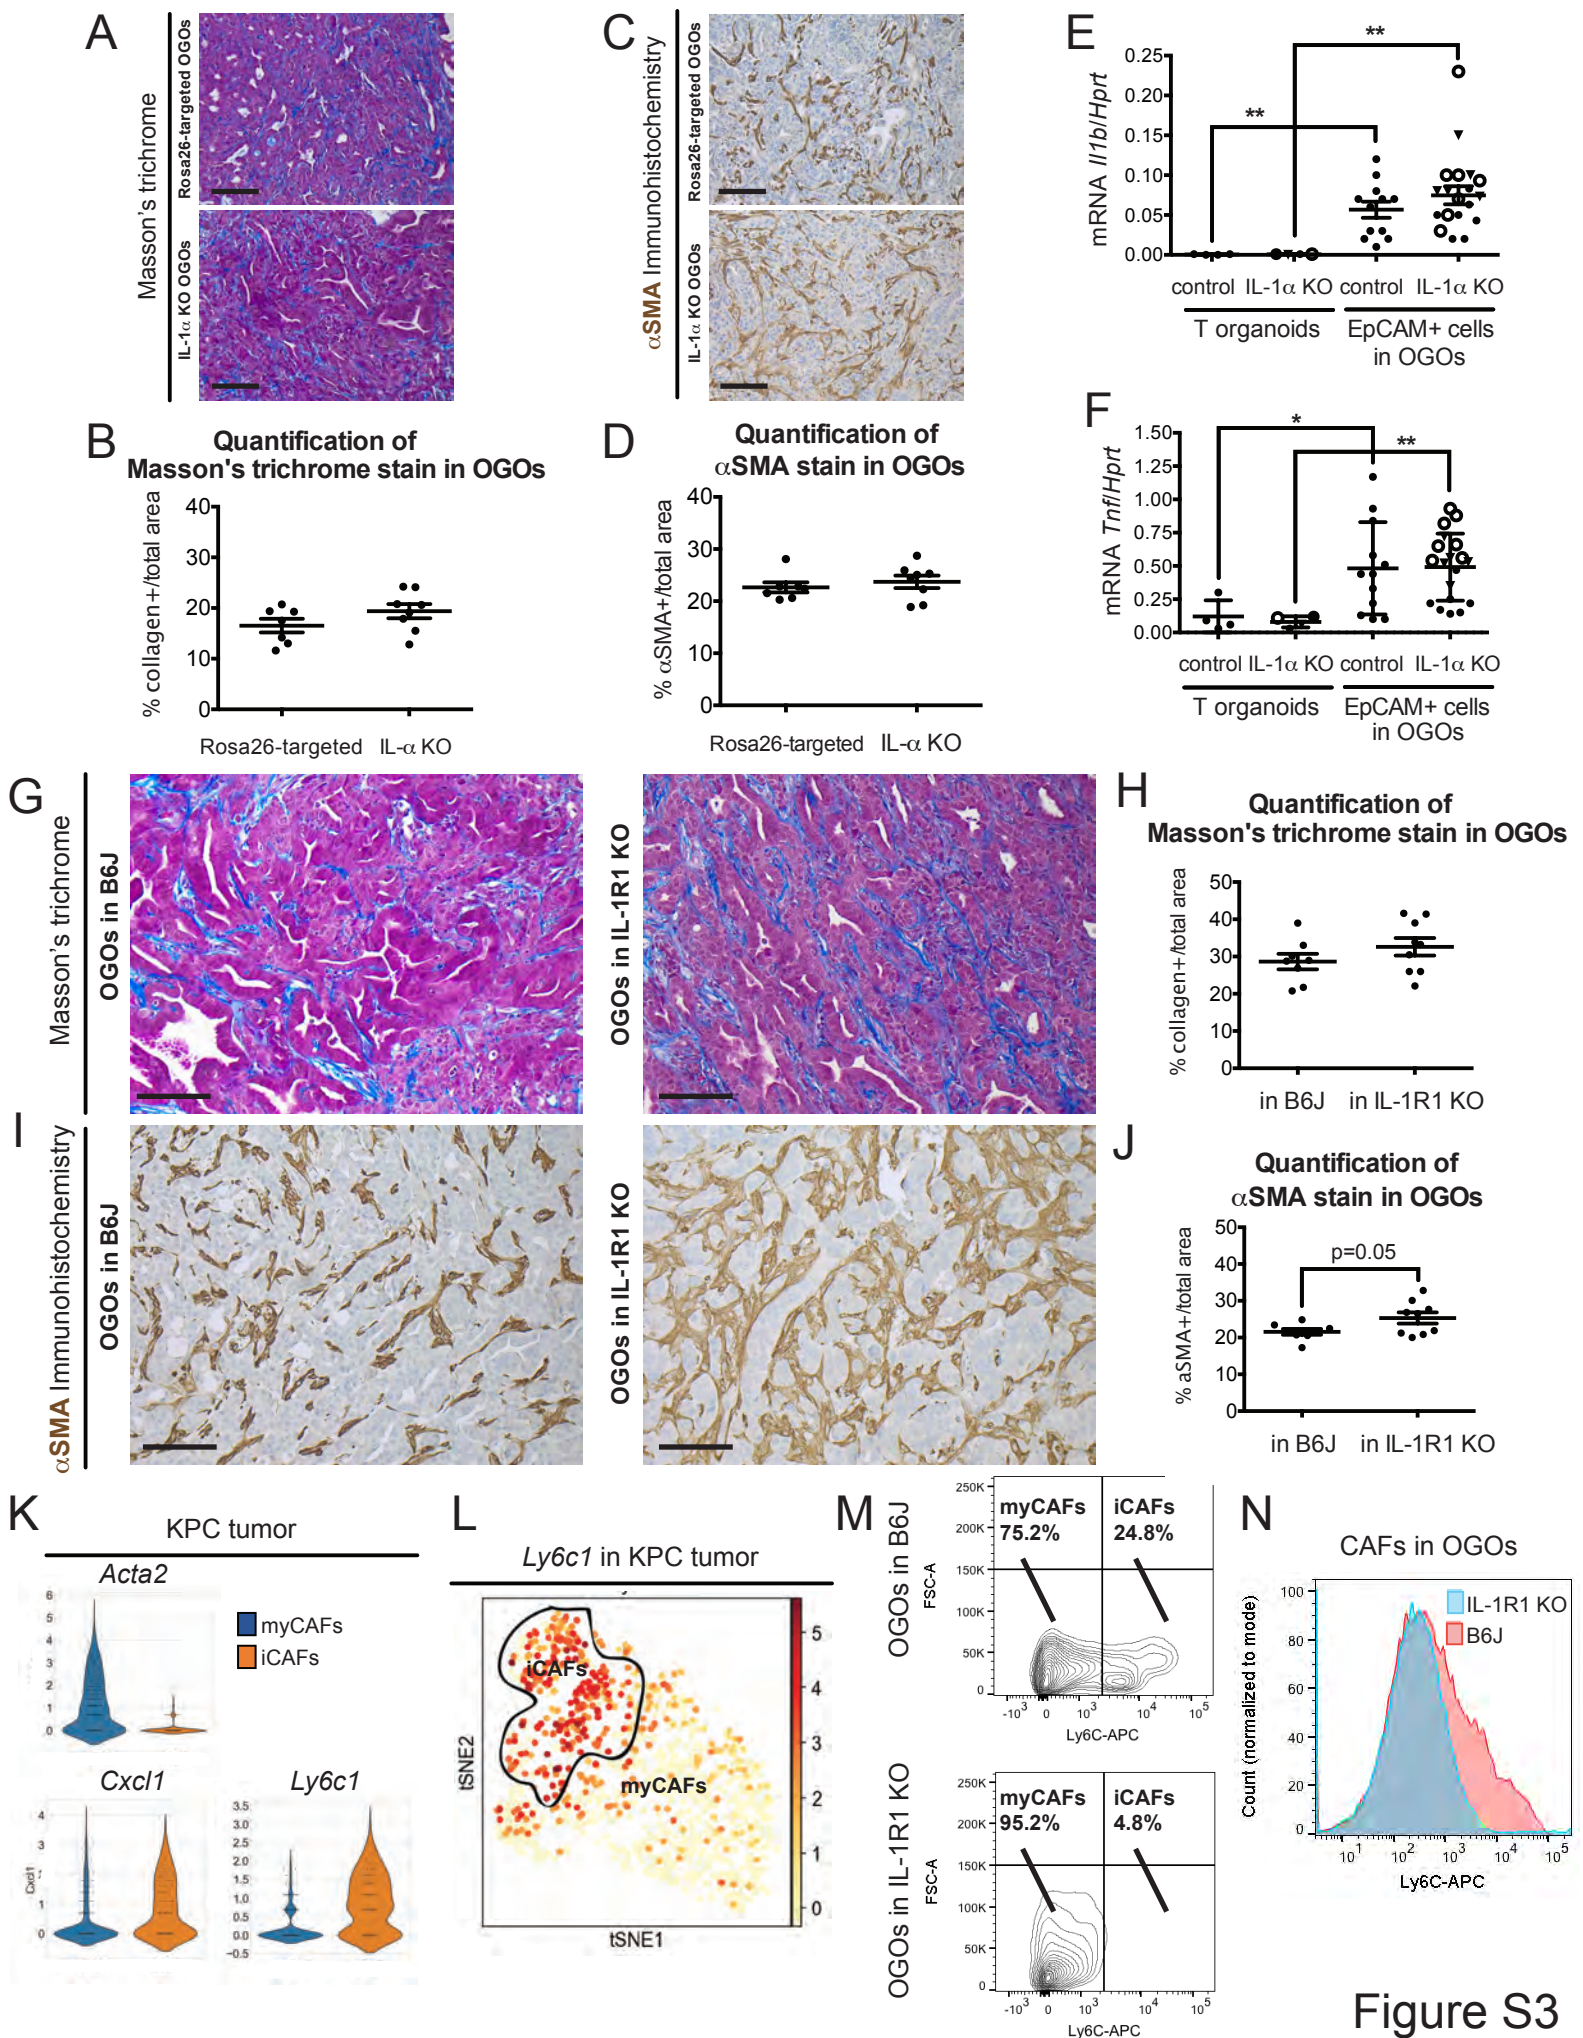

Figure S3

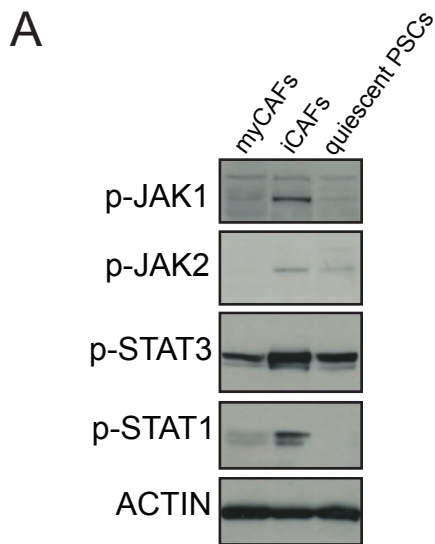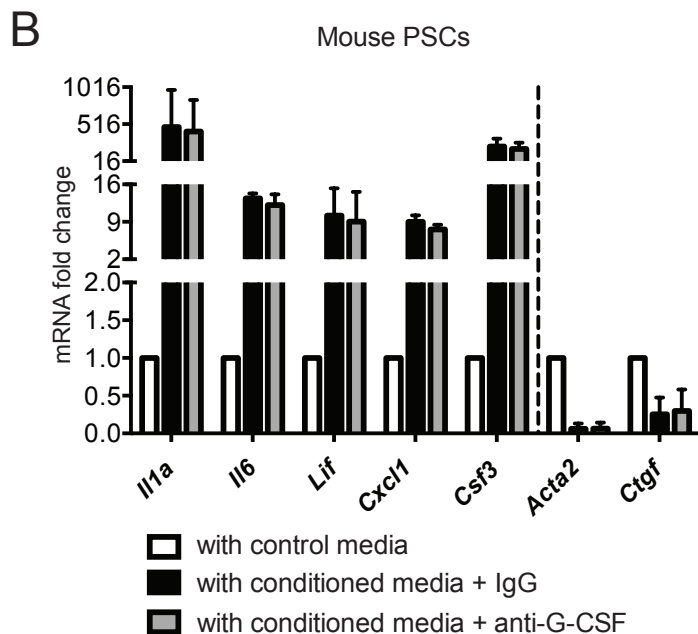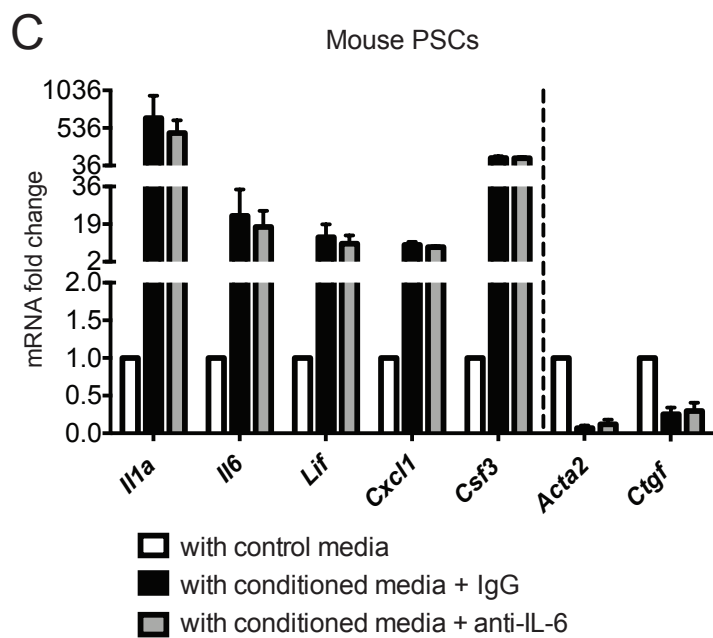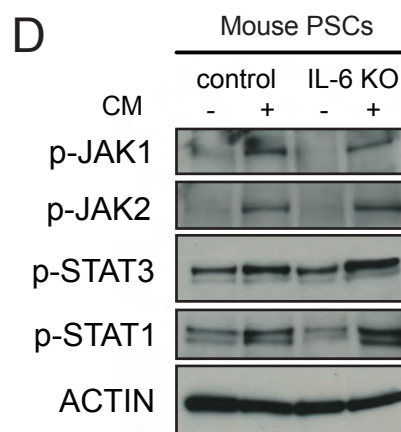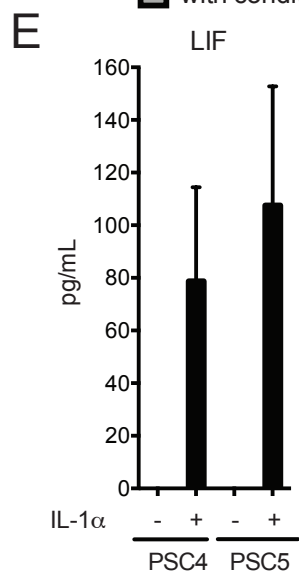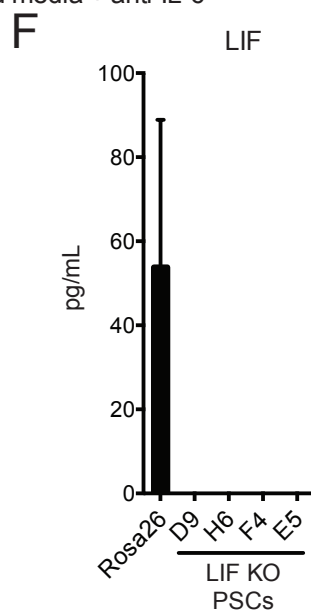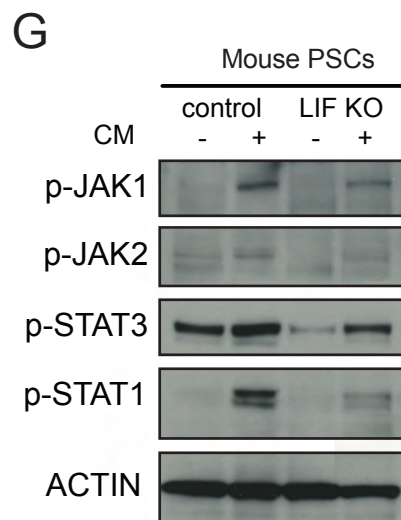

Figure S4



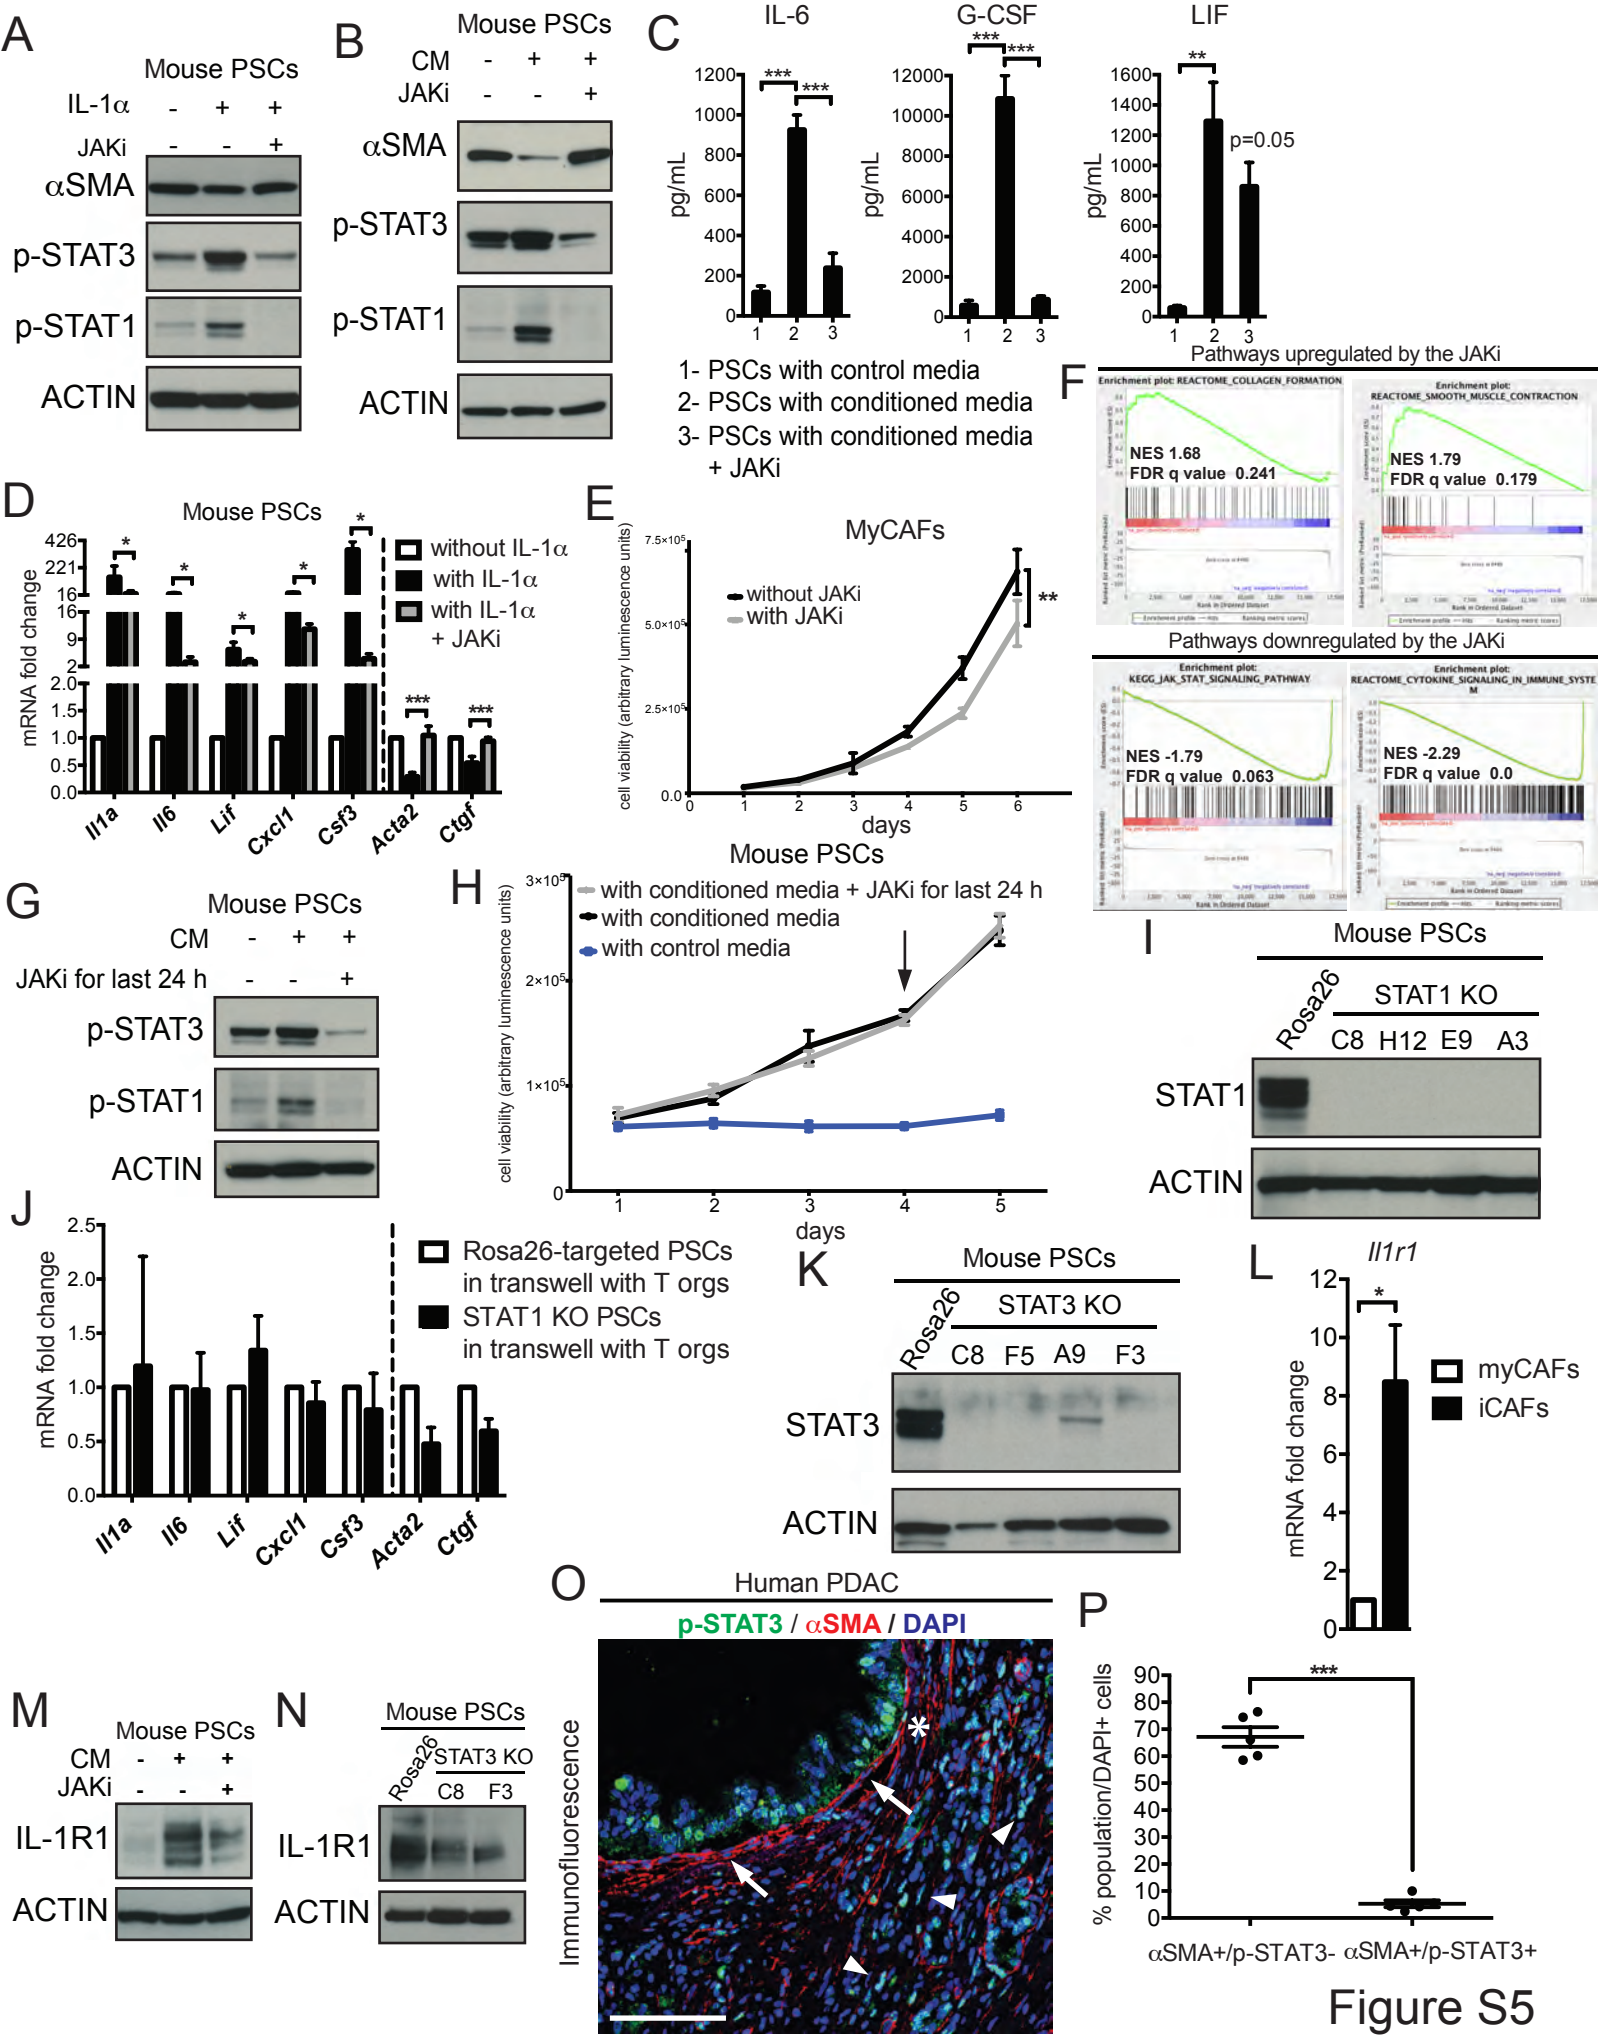

Figure S5



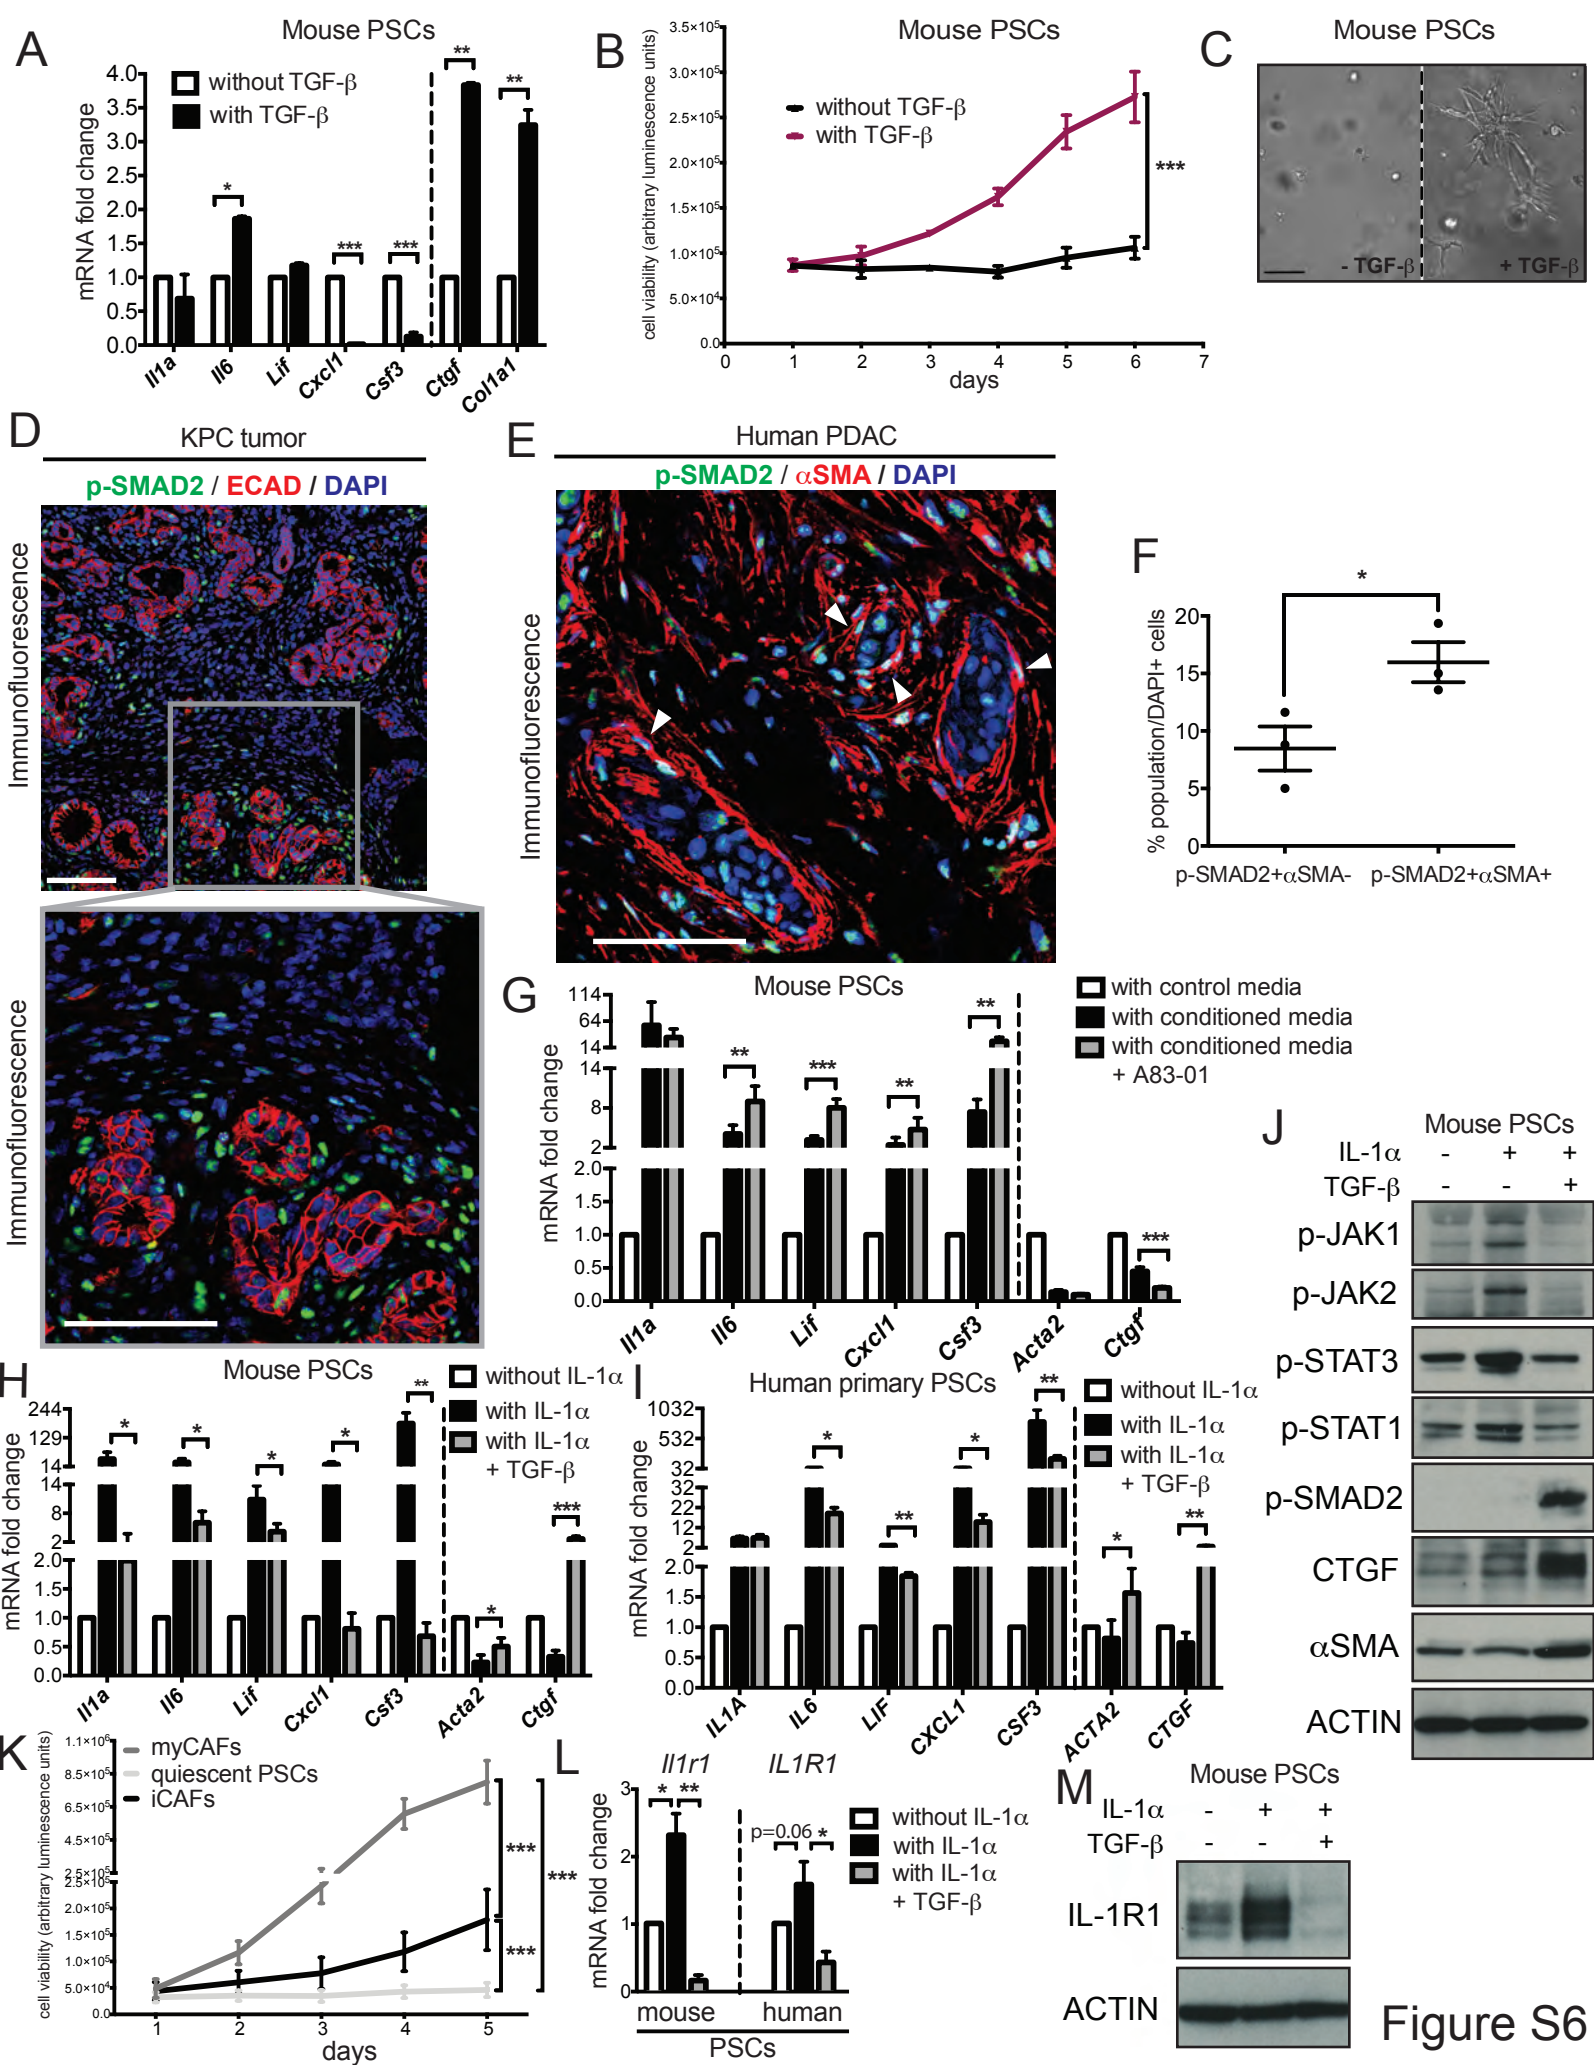

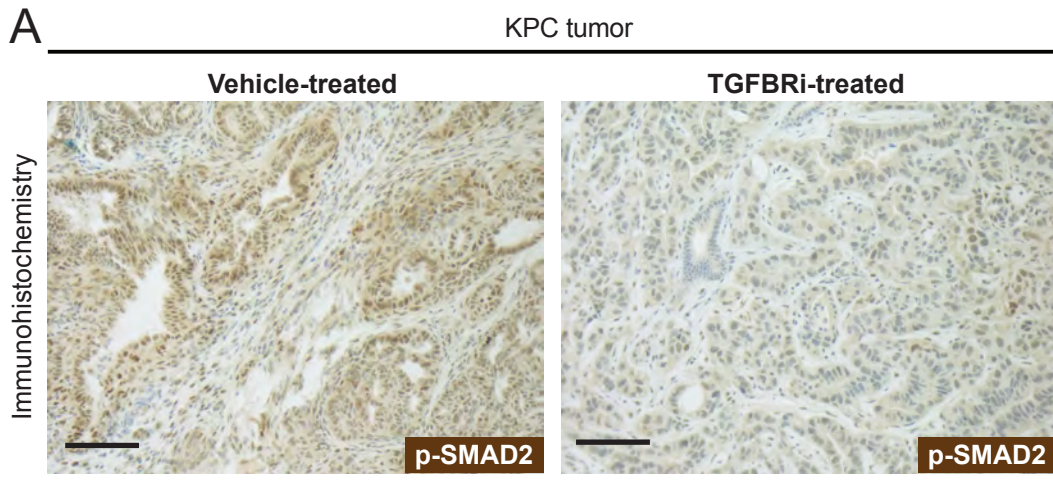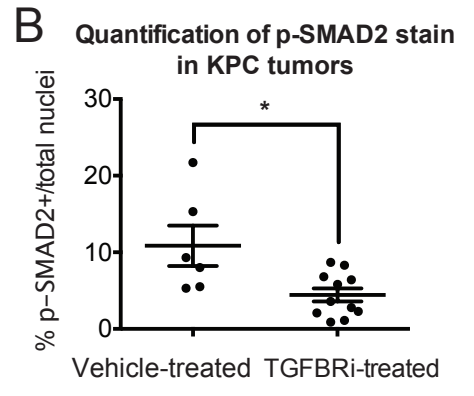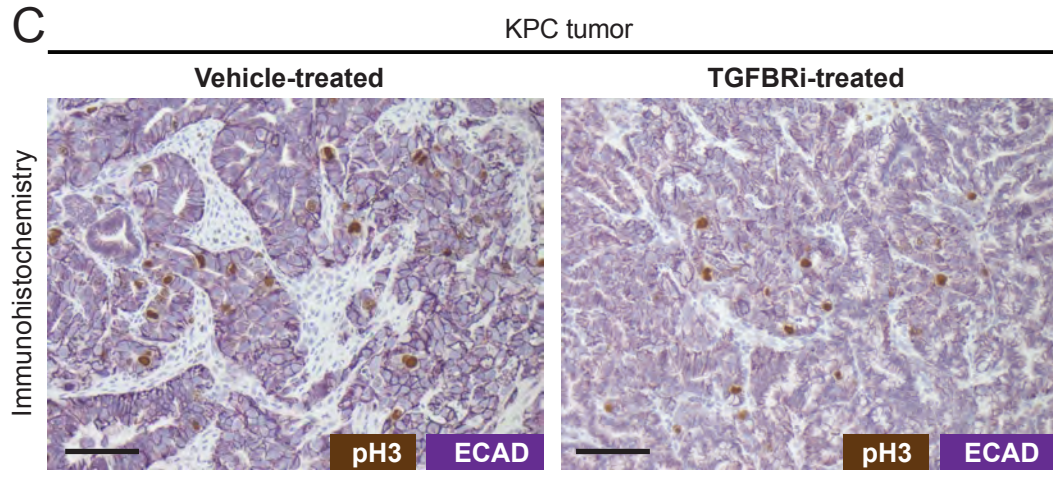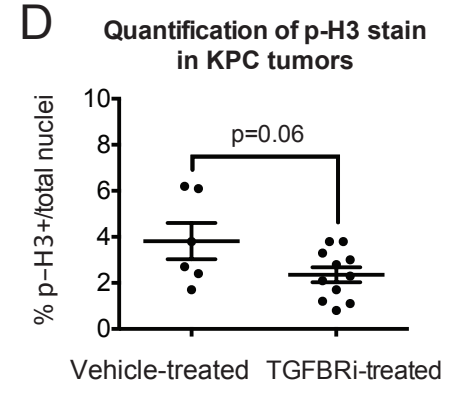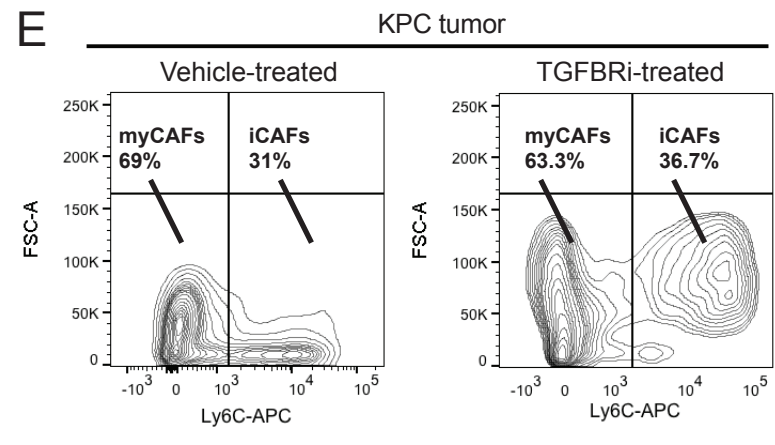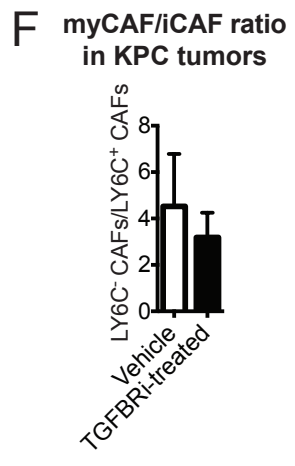

Figure S7



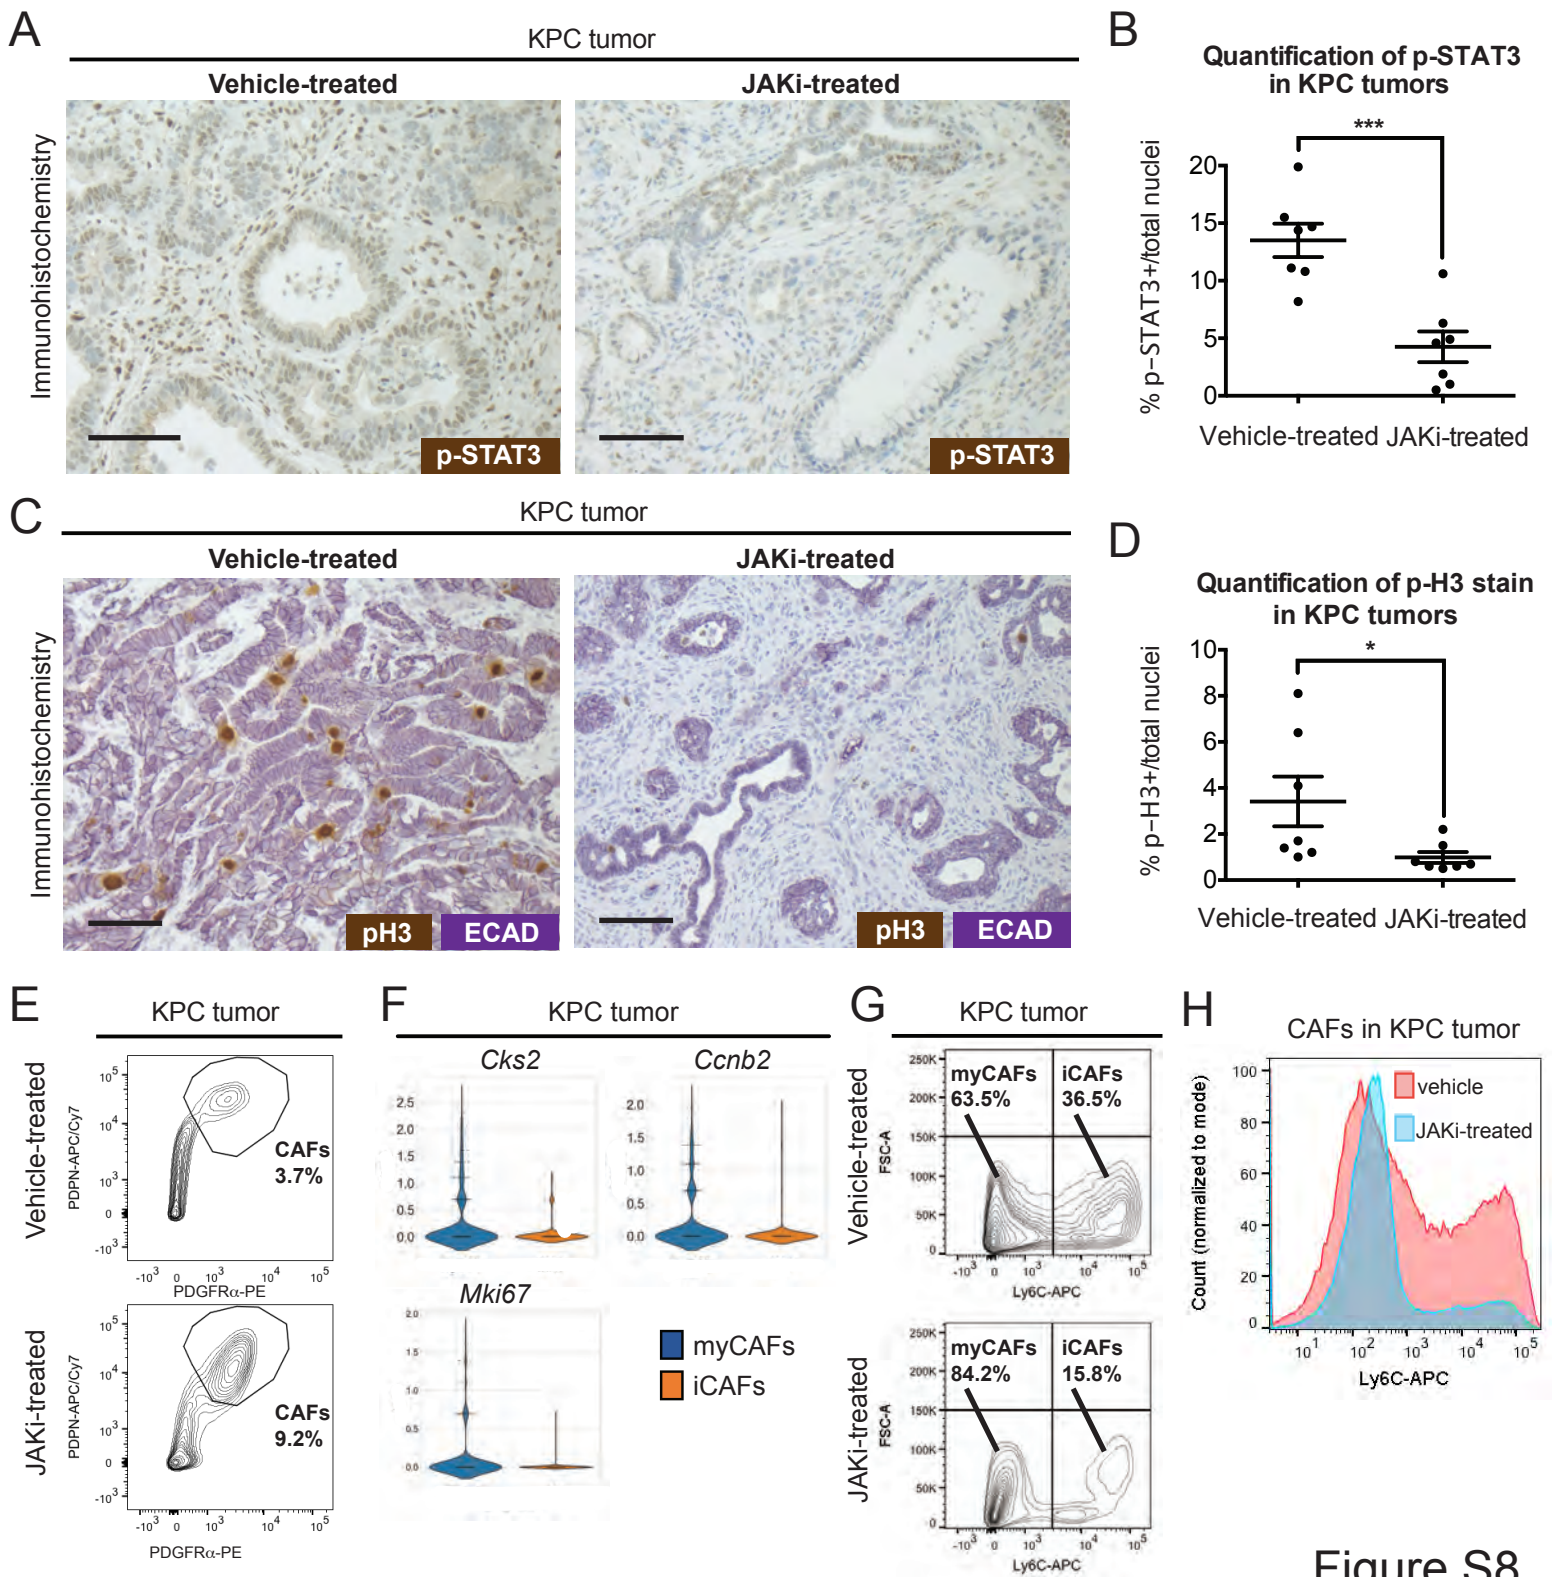

Figure S8

Supplement: 21598290cd180710-sup-204092_2_supp_5107956_pg7n6f.pdf [file 21598290cd180710-sup-204092_2_supp_5107956_pg7n6f.pdf]
